# Supplementary material for: Suitability for e-health of non-pharmacological interventions in connective tissue diseases: scoping review with a descriptive analysis
Source: HighWire-hosted journal article supplement (doi:10.1136/rmdopen-2021-001710), 2021-07-01
Supplement: rmdopen-2021-001710supp002_data_supplement.pdf [file rmdopen-2021-001710supp002_data_supplement.pdf]

**Supplement 2. Studies excluded (full-text selection).**

| Nr. | Author                               | Year | Title                                                                                                                                                                                                                                         | Reason for exclusion       |
|-----|--------------------------------------|------|-----------------------------------------------------------------------------------------------------------------------------------------------------------------------------------------------------------------------------------------------|----------------------------|
| 1   | Agarwal, et al. <sup>1</sup>         | 2015 | Lupus: Vocational aspects and the best rehabilitation practices                                                                                                                                                                               | Intervention not described |
| 2   | Alpay and Cassem <sup>2</sup>        | 1999 | Mood disorders in rheumatic disease: evaluation and management                                                                                                                                                                                | Intervention not described |
| 3   | Alpiner, et al. <sup>3</sup>         | 1995 | Rehabilitation in joint and connective tissue diseases. 1. Systemic diseases                                                                                                                                                                  | Intervention not described |
| 4   | Anolik <sup>4</sup>                  | 2012 | New hope for lupus sufferers                                                                                                                                                                                                                  | Intervention not described |
| 5   | Ayán and Martin <sup>5</sup>         | 2007 | Systemic lupus erythematosus and exercise                                                                                                                                                                                                     | Intervention not described |
| 6   | Barnes and Tanaka <sup>6</sup>       | 2012 | Cardiovascular benefits of habitual exercise in systemic lupus erythematosus: a review                                                                                                                                                        | Intervention not described |
| 7   | Bauman, et al. <sup>7</sup>          | 1989 | The unmet needs of patients with systemic lupus erythematosus: Planning for patient education                                                                                                                                                 | Intervention not described |
| 8   | Benatti and Pedersen <sup>8</sup>    | 2015 | Exercise as an anti-inflammatory therapy for rheumatic diseases-myokine regulation                                                                                                                                                            | Intervention not described |
| 9   | Brady, et al. <sup>9</sup>           | 2003 | Intervention programs for arthritis and other rheumatic diseases                                                                                                                                                                              | Intervention not described |
| 10  | Buenaver, et al. <sup>10</sup>       | 2006 | Cognitive-Behavioral Self-Help for Chronic Pain                                                                                                                                                                                               | Intervention not described |
| 11  | Carr, et al. <sup>11</sup>           | 1997 | Use of continuous passive motion to increase hand range of motion in a woman with scleroderma: a single subject study                                                                                                                         | Abstract/no details        |
| 12  | Casale, et al. <sup>12</sup>         | 1997 | Systemic sclerosis (scleroderma): an integrated challenge in rehabilitation                                                                                                                                                                   | Intervention not described |
| 13  | Clar, et al. <sup>13</sup>           | 2014 | Clinical effectiveness of manual therapy for the management of musculoskeletal and non-musculoskeletal conditions: Systematic review and update of UK evidence report                                                                         | Intervention not described |
| 14  | Connolly <sup>14</sup>               | 1984 | Scleroderma: therapeutic options                                                                                                                                                                                                              | Abstract/no details        |
| 15  | Crofts and D'Cruz <sup>15</sup>      | 1997 | Systemic lupus erythematosus. Part 2: The role of the nurse                                                                                                                                                                                   | Intervention not described |
| 16  | Daltroy <sup>16</sup>                | 2013 | Psychoeducational Approach to Improve Health in Lupus                                                                                                                                                                                         | Intervention not described |
| 17  | Daste, et al. <sup>17</sup>          | 2018 | Patient acceptable symptom state and minimal clinically important difference for patient-reported outcomes in systemic sclerosis: a secondary analysis of a randomized controlled trial comparing personalized physical therapy to usual care | Intervention not described |
| 18  | de Oliveira, et al. <sup>18</sup>    | 2017 | Aerobic and resistance exercise in systemic sclerosis: State of the art                                                                                                                                                                       | Intervention not described |
| 19  | Delisle, et al. <sup>19</sup>        | 2016 | Effect of support group peer facilitator training programmes on peer facilitator and support group member outcomes: a systematic review                                                                                                       | Abstract/no details        |
| 20  | Dorsey, et al. <sup>20</sup>         | 2004 | Health-Related Quality of Life and Support Group Attendance for Patients with Systemic Lupus Erythematosus                                                                                                                                    | Intervention not described |
| 21  | Feldman, et al. <sup>21</sup>        | 2012 | Designing an intervention for women with systemic lupus erythematosus from medically underserved areas to improve care: a qualitative study                                                                                                   | Intervention not described |
| 22  | Flournoy-Floyd, et al. <sup>22</sup> | 2018 | "We Would Still Find Things to Talk About": Assessment of Mentor Perspectives in a Systemic Lupus Erythematosus Intervention to Improve Disease Self-Management, Empowering SLE Patients.                                                     | Intervention not described |
| 23  | Fortin <sup>23</sup>                 | 2007 | HIPP Learning to Live Better With Lupus: the Health Improvement and Prevention Program in Systemic Lupus Erythematosus                                                                                                                        | Intervention not described |
| 24  | Furness, et al. <sup>24</sup>        | 2013 | Interventions for the management of dry mouth: non-pharmacological interventions                                                                                                                                                              | Wrong disease              |
| 25  | Giguère, et al. <sup>25</sup>        | 2012 | Printed educational materials: effects on professional practice and healthcare outcomes                                                                                                                                                       | Intervention not described |
| 26  | Gualano, et al. <sup>26</sup>        | 2011 | Therapeutic effects of exercise training in patients with pediatric rheumatic diseases                                                                                                                                                        | Intervention not described |
| 27  | Gumuchian, et al. <sup>27</sup>      | 2017 | Reasons for attending support groups and organizational preferences: the European scleroderma support group members survey                                                                                                                    | Intervention not described |
| 28  | Haythornthwaite <sup>28</sup>        | 2017 | Psychological Treatments for Scleroderma                                                                                                                                                                                                      | Intervention not described |
| 29  | Hoving, et al. <sup>29</sup>         | 2014 | Non-pharmacological interventions for preventing job loss in workers with inflammatory arthritis                                                                                                                                              | Intervention not described |
| 30  | Kelley, et al. <sup>30</sup>         | 2015 | Effects of exercise on depression in adults with arthritis: a systematic review with meta-analysis of randomized controlled trials                                                                                                            | Intervention not described |
| 31  | Kier, et al. <sup>31</sup>           | 2016 | How do women with lupus manage fatigue? A focus group study                                                                                                                                                                                   | Intervention not described |
| 32  | Klyszcz, et al. <sup>32</sup>        | 1999 | Biomechanical stimulation therapy. A novel physiotherapy method for systemic sclerosis                                                                                                                                                        | Bookchapter/no details     |

| Nr. | Author                                    | Year | Title                                                                                                                                                              | Reason for exclusion       |
|-----|-------------------------------------------|------|--------------------------------------------------------------------------------------------------------------------------------------------------------------------|----------------------------|
| 33  | Ko, et al. <sup>33</sup>                  | 2016 | A Comprehensive Rehabilitation Approach in a Patient With Serious Neuropsychiatric Systemic Lupus Erythematosus                                                    | Intervention not described |
| 34  | Maddali-Bongi and Del Rosso <sup>34</sup> | 2016 | Systemic sclerosis: rehabilitation as a tool to cope with disability                                                                                               | Intervention not described |
| 35  | Merz, et al. <sup>35</sup>                | 2009 | A longitudinal analysis of humor coping and quality of life in systemic sclerosis                                                                                  | Intervention not described |
| 36  | Meunier, et al. <sup>36</sup>             | 2015 | Characteristics and information searched for by French patients with systemic lupus erythematosus: A web-community data-driven online survey                       | Intervention not described |
| 37  | Miozzi, et al. <sup>37</sup>              | 2012 | Using exercise training to counterbalance chronotropic incompetence and delayed heart rate recovery in systemic lupus erythematosus: a randomized trial            | Abstract/no details        |
| 38  | Miyamoto, et al. <sup>38</sup>            | 2019 | Supervised walking improves cardiorespiratory fitness, exercise tolerance, and fatigue in women with primary Sjögren's syndrome: a randomized-controlled trial.    | Wrong disease              |
| 39  | Ng, et al. <sup>39</sup>                  | 1990 | Management of systemic sclerosis--a review                                                                                                                         | Abstract/no details        |
| 40  | O'Dwyer, et al. <sup>40</sup>             | 2017 | Exercise and physical activity in systemic lupus erythematosus: a systematic review with meta-analyses                                                             | Intervention not described |
| 41  | Otterness <sup>41</sup>                   | 2005 | Advanced practice notes. Scleroderma: a case presentation                                                                                                          | Abstract/no details        |
| 42  | Otterness <sup>42</sup>                   | 2006 | Scleroderma: a case presentation                                                                                                                                   | Abstract/no details        |
| 43  | Panchbhai, et al. <sup>43</sup>           | 2016 | Review of orofacial considerations of systemic sclerosis or scleroderma with report of analysis of 3 cases                                                         | Intervention not described |
| 44  | Peterson, et al. <sup>44</sup>            | 1993 | Effect of counselor training on skills development and psychosocial status of volunteers with systemic lupus erythematosus                                         | Intervention not described |
| 45  | Piga, et al. <sup>45</sup>                | 2017 | Telemedicine for patients with rheumatic diseases: Systematic review and proposal for research agenda                                                              | Intervention not described |
| 46  | Poiraudeau <sup>46</sup>                  | 2018 | Effects of a Personalized Standardized Rehabilitation Program on the Quality of Life of Patients With Systemic Sclerosis Patients : a Randomized Controlled Trial  | Intervention not described |
| 47  | Poole <sup>47</sup>                       | 2010 | Musculoskeletal rehabilitation in the person with scleroderma                                                                                                      | Intervention not described |
| 48  | Poole, et al. <sup>48</sup>               | 2013 | Evidence-based management of hand and mouth disability in a woman living with diffuse systemic sclerosis (scleroderma)                                             | Intervention not described |
| 49  | Ramos-Remus, et al. <sup>49</sup>         | 2000 | How important is patient education?                                                                                                                                | Intervention not described |
| 50  | Rhee, et al. <sup>50</sup>                | 2013 | Readability and suitability assessment of patient education materials in rheumatic diseases                                                                        | Intervention not described |
| 51  | Riksen, et al. <sup>51</sup>              | 1992 | Rehabilitation in systemic sclerosis. A case-report and a review of the literature                                                                                 | Abstract/no details        |
| 52  | Rizk and Park <sup>52</sup>               | 1981 | Transcutaneous electrical nerve stimulation and extensor splint in linear scleroderma knee contracture                                                             | Abstract/no details        |
| 53  | Roberts <sup>53</sup>                     | 2005 | Randomized Study of Individualized Instruction Versus Pamphlet in Systemic Lupus Erythematosus                                                                     | Intervention not described |
| 54  | Rudolph, et al. <sup>54</sup>             | 1974 | Efficacy of psychiatric management of linear scleroderma                                                                                                           | Abstract/no details        |
| 55  | Ryan <sup>55</sup>                        | 1996 | The role of the nurse in the management of scleroderma                                                                                                             | Intervention not described |
| 56  | Scalzi, et al. <sup>56</sup>              | 2018 | Improvement of medication adherence in adolescents and young adults with SLE using web-based education with and without a social media intervention, a pilot study | Intervention not described |
| 57  | Schouffoer, et al. <sup>57</sup>          | 2015 | The educational needs of people with systemic sclerosis: a cross-sectional study using the Dutch version of the Educational Needs Assessment Tool (D-ENAT)         | Intervention not described |
| 58  | Stefanantoni, et al. <sup>58</sup>        | 2016 | Occupational therapy integrated with a self-administered stretching program on systemic sclerosis patients with hand involvement.                                  | Abstract/no details        |
| 59  | Strombeck and Jacobsson <sup>59</sup>     | 2007 | The role of exercise in the rehabilitation of patients with systemic lupus erythematosus and patients with primary Sjogren's syndrome                              | Abstract/no details        |
| 60  | Sutton, et al. <sup>60</sup>              | 1984 | Systemic lupus erythematosus XI: Nonpharmacological management                                                                                                     | Abstract/no details        |
| 61  | Takei and Hokonohara <sup>61</sup>        | 1993 | Quality of life and daily management of children with rheumatic disease                                                                                            | Intervention not described |
| 62  | Tench, et al. <sup>62</sup>               | 2002 | Aerobic fitness, fatigue, and physical disability in systemic lupus erythematosus                                                                                  | Intervention not described |
| 63  | Thomas <sup>63</sup>                      | 2013 | Helpful or harmful? Potential effects of exercise on select inflammatory conditions                                                                                | Intervention not described |
| 64  | Tiffreau, et al. <sup>64</sup>            | 2016 | Postrehabilitation Functional Improvements in Patients With Inflammatory Myopathies: The Results of a Randomized Controlled Trial                                  | Intervention not described |

| Nr.                                                         | Author                              | Year | Title                                                                                                                                                                              | Reason for exclusion           |
|-------------------------------------------------------------|-------------------------------------|------|------------------------------------------------------------------------------------------------------------------------------------------------------------------------------------|--------------------------------|
| 65                                                          | Ting and Sontheimer <sup>65</sup>   | 2001 | Local therapy for cutaneous and systemic lupus erythematosus: practical and theoretical considerations                                                                             | Intervention not described     |
| 66                                                          | Van Dessel, et al. <sup>66</sup>    | 2014 | Non pharmacological interventions for somatoform disorders and medically unexplained physical symptoms (MUPS) in adults                                                            | Intervention not described     |
| 67                                                          | White <sup>67</sup>                 | 1978 | Teaching patients to manage systemic lupus erythematosus                                                                                                                           | Abstract/no details            |
| 68                                                          | White and Ziegler <sup>68</sup>     | 1980 | Patient management of systemic lupus erythematosus                                                                                                                                 | Abstract/no details            |
| 69                                                          | Willems, et al. <sup>69</sup>       | 2015 | Effectiveness of Nonpharmacologic Interventions in Systemic Sclerosis: A Systematic Review                                                                                         | Intervention not described     |
| 70                                                          | Williams, et al. <sup>70</sup>      | 2017 | Effective Self-Management Interventions for Patients With Lupus: Potential Impact of Peer Mentoring                                                                                | Intervention not described     |
| 71                                                          | Winkelmann, et al. <sup>71</sup>    | 1971 | Management of scleroderma                                                                                                                                                          | Abstract/no details            |
| 72                                                          | Yuen and Cunningham <sup>72</sup>   | 2014 | Optimal management of fatigue in patients with systemic lupus erythematosus: a systematic review                                                                                   | Intervention not described     |
| 73                                                          | Yuen, et al. <sup>73</sup>          | 2012 | The process associated with motivation of a home-based Wii Fit exercise program among sedentary African American women with systemic lupus erythematosus                           | Intervention not described     |
| <b>Updated search, excluded studies, first of July 2020</b> |                                     |      |                                                                                                                                                                                    |                                |
| 1                                                           | da Hora, et al. <sup>74</sup>       | 2019 | The effect of therapies on the quality of life of patients with systemic lupus erythematosus: a meta-analysis of randomized trials.                                                | Intervention not described     |
| 2                                                           | Dantas, et al. <sup>75</sup>        | 2020 | Mobile health technologies for the management of systemic lupus erythematosus: a systematic review.                                                                                | Intervention not described     |
| 3                                                           | Durcan, et al. <sup>76</sup>        | 2019 | Management strategies and future directions for systemic lupus erythematosus in adults.                                                                                            | Intervention not described     |
| 4                                                           | Fangtham, et al. <sup>77</sup>      | 2018 | Non-pharmacological treatment on fatigue, depression, disease activity, and quality of life of systemic lupus erythematosus: A systematic review                                   | Intervention not described     |
| 5                                                           | Fangtham, et al. <sup>78</sup>      | 2019 | Non-pharmacologic therapies for systemic lupus erythematosus;                                                                                                                      | Intervention not described     |
| 6                                                           | Fuentes-Silva, et al. <sup>79</sup> | 2019 | Let's talk about lupus live video chats with an expert: An interactive facebook resource for patient education about lupus.                                                        | Abstract/no details            |
| 7                                                           | Hoe, et al. <sup>80</sup>           | 2018 | Ergonomic interventions for preventing work-related musculoskeletal disorders of the upper limb and neck among office workers.                                                     | Wrong disease                  |
| 8                                                           | Hulme, et al. <sup>81</sup>         | 2018 | Fatigue interventions in long term, physical health conditions: A scoping review of systematic reviews.                                                                            | Intervention not described     |
| 9                                                           | Kearns, et al. <sup>82</sup>        | 2019 | New perspectives on dry needling following a medical model: are we screening our patients sufficiently?                                                                            | Clinical commentary/no details |
| 10                                                          | Kocher, et al. <sup>83</sup>        | 2019 | Developing a rare disease chronic care model: Management of systemic sclerosis (MANOSS) study protocol.                                                                            | Intervention not described     |
| 11                                                          | Kusnanto, et al. <sup>84</sup>      | 2018 | Self-care model application to improve self-care agency, self-care activities, and quality of life in patients with systemic lupus erythematosus                                   | Duplicate                      |
| 12                                                          | Kwakkenbos, et al. <sup>85</sup>    | 2018 | Randomized feasibility trial of the scleroderma patient-centered intervention network hand exercise program (SPIN-HAND).                                                           | Duplicate                      |
| 13                                                          | Liem, et al. <sup>86</sup>          | 2019 | The effect and safety of exercise therapy in patients with systemic sclerosis: a systematic review.                                                                                | Intervention not described     |
| 14                                                          | Mitropoulos, et al. <sup>87</sup>   | 2018 | Investigating the effectiveness and feasibility of exercise on microvascular reactivity and quality of life in systemic sclerosis patients: study protocol for a feasibility study | Duplicate                      |
| 15                                                          | Mitropoulos, et al. <sup>88</sup>   | 2018 | The effects of upper and lower limb exercise on the microvascular reactivity in limited cutaneous systemic sclerosis patients                                                      | Duplicate                      |
| 16                                                          | Mugii, et al. <sup>89</sup>         | 2019 | Long-term follow-up of finger passive range of motion in Japanese systemic sclerosis patients treated with self-administered stretching.                                           | Duplicate                      |
| 17                                                          | Mugii, et al. <sup>90</sup>         | 2018 | Clinical significance and usefulness of rehabilitation for systemic sclerosis.                                                                                                     | Intervention not described     |
| 18                                                          | Murphy, et al. <sup>91</sup>        | 2018 | Occupational Therapy Treatment to Improve Upper Extremity Function in Individuals with Early Systemic Sclerosis: A Pilot Study.                                                    | Duplicate                      |
| 19                                                          | Phillip, et al. <sup>92</sup>       | 2019 | Implementation and dissemination of an African American popular opinion model to improve lupus awareness: an academic-community partnership.                                       | Intervention not described     |
| 20                                                          | Poole, et al. <sup>93</sup>         | 2019 | Effectiveness of Occupational Therapy Interventions for Adults With Systemic Lupus Erythematosus: A Systematic Review.                                                             | Intervention not described     |
| 21                                                          | Rice and Thombs <sup>94</sup>       | 2019 | Support Groups in Scleroderma.                                                                                                                                                     | Intervention not described     |

| Nr. | Author                                 | Year | Title                                                                                                                                                                                                                                                                    | Reason for exclusion       |
|-----|----------------------------------------|------|--------------------------------------------------------------------------------------------------------------------------------------------------------------------------------------------------------------------------------------------------------------------------|----------------------------|
| 22  | Sieczkowska, et al. <sup>95</sup>      | 2020 | Effects of resistance training on the health-related quality of life of patients with rheumatic diseases: systematic review with meta-analysis and meta-regression.                                                                                                      | Intervention not described |
| 23  | Smith and Pauling <sup>96</sup>        | 2019 | The efficacy of dietary intervention on gastrointestinal involvement in systemic sclerosis: A systematic literature review.                                                                                                                                              | Intervention not described |
| 24  | Špiritović, et al. <sup>97</sup>       | 2018 | Non-pharmacological treatment in systemic sclerosis.                                                                                                                                                                                                                     | Intervention not described |
| 25  | Teng, et al. <sup>98</sup>             | 2018 | An evidence-based approach to pre-pregnancy counselling for patients with systemic lupus erythematosus.                                                                                                                                                                  | Intervention not described |
| 26  | Thombs, et al. <sup>99</sup>           | 2019 | Protocol for a partially nested randomized controlled trial to evaluate the effectiveness of the Scleroderma Patient-centered Intervention Network Support Group Leader Education (SPIN-SSLED) Programe                                                                  | Intervention not described |
| 27  | Thombs, et al. <sup>100</sup>          | 2019 | Scleroderma Patient-centered Intervention Network-Scleroderma Support group Leader EDucation (SPIN-SSLED) program: Non-randomised feasibility trial.                                                                                                                     | Intervention not described |
| 28  | Thombs, et al. <sup>101</sup>          | 2020 | Protocol for a partially nested randomised controlled trial to evaluate the effectiveness of the scleroderma patient-centered intervention network COVID-19 home-isolation activities together (SPIN-CHAT) program to reduce anxiety among at-risk scleroderma patients. | Intervention not described |
| 29  | Timóteo, et al. <sup>102</sup>         | 2018 | Increased flexibility, pain reduction and unaltered levels of IL-10 and CD11b + lymphocytes in patients with systemic lupus erythematosus were associated with kinesiotherapy.                                                                                           | Duplicate                  |
| 30  | Tisseverasinghe, et al. <sup>103</sup> | 2018 | Anxiety and Mood Disorders in Systemic Lupus Erythematosus: Current Insights and Future Directions.                                                                                                                                                                      | Intervention not described |

## References:

1. Agarwal N, Yasui NY, Kumar V. Lupus: Vocational aspects and the best rehabilitation practices. *Journal of Vocational Rehabilitation* 2015;43(1):83-90.
2. Alpay M, Cassem EH. Mood disorders in rheumatic disease: Evaluation and management. *The Journal of Musculoskeletal Medicine* 1999;16(11):643-43.
3. Alpiner N, Oh TH, Hinderer SR, et al. Rehabilitation in joint and connective tissue diseases. 1. Systemic diseases. *Archives of physical medicine and rehabilitation* 1995;76(5):S32-S40.
4. Anolik JH. New Hope for Lupus Sufferers—While There is No “Cure,” a Breakthrough Drug Can Make a Difference 2012 [Available from: <https://bottomlineinc.com/health/autoimmune-disease/new-hope-for-lupus-sufferers-while-there-is-no-cure-a-breakthrough-drug-can-make-a-difference>].
5. Ayán C, Martin V. Systemic lupus erythematosus and exercise. *Lupus* 2007;16(1):5-9.
6. Barnes JN, Tanaka H. Cardiovascular benefits of habitual exercise in systemic lupus erythematosus: a review. *The Physician and sportsmedicine* 2012;40(3):43-48.
7. Bauman A, Barnes C, Schrieber L, et al. The unmet needs of patients with systemic lupus erythematosus: planning for patient education. *Patient Education and Counseling* 1989;14(3):235-42.
8. Benatti FB, Pedersen BK. Exercise as an anti-inflammatory therapy for rheumatic diseases—myokine regulation. *Nature reviews rheumatology* 2015;11(2):86.
9. Brady TJ, Kruger J, Helmick CG, et al. Intervention programs for arthritis and other rheumatic diseases. *Health Education & Behavior* 2003;30(1):44-63.
10. Buenaver LF, McGuire L, Haythornthwaite JA. Cognitive-Behavioral self-help for chronic pain. *Journal of clinical psychology* 2006;62(11):1389-96.
11. Carr S, Fairleigh A, Backman C. Use of Continuous Passive Motion to Increase Hand Range of Motion in a Woman with Scleroderma: A Single Subject Study. *Physiotherapy Canada* 1997;49(4):292-96.
12. Casale R, Buonocore M, Matucci-Cerinic M. Systemic sclerosis (scleroderma): an integrated challenge in rehabilitation. *Archives of physical medicine and rehabilitation* 1997;78(7):767-73.
13. Clar C, Tsertsvadze A, Hundt GL, et al. Clinical effectiveness of manual therapy for the management of musculoskeletal and non-musculoskeletal conditions: systematic review and update of UK evidence report. *Chiropractic & manual therapies* 2014;22(1):12.
14. Connolly S. Scleroderma: therapeutic options. *Cutis* 1984;34(3):274-76.
15. Crofts P, D'Cruz D. Systemic lupus erythematosus. Part 2: The role of the nurse. *Nursing standard (Royal College of Nursing (Great Britain): 1987)* 1997;11(44):40-44.
16. Daltroy LH. A Randomized Controlled Trial of a Psychoeducational Intervention to Improve Outcomes in Systemic Lupus Erythematosus (SLE) 2013 [Available from: <https://clinicaltrials.gov/ct2/show/record/NCT00000417>].
17. Patient acceptable symptom state and minimal clinically important difference for patient-reported outcomes in systemic sclerosis: A secondary analysis of a randomized controlled trial comparing personalized physical therapy to usual care. *Seminars in arthritis and rheumatism*; 2019. Elsevier.
18. de Oliveira NC, Portes LA, Pettersson H, et al. Aerobic and resistance exercise in systemic sclerosis: state of the art. *Musculoskeletal Care* 2017;15(4):316-23.
19. Delisle VC, Gumuchian ST, Kloda LA, et al. Effect of support group peer facilitator training programmes on peer facilitator and support group member outcomes: a systematic review. *BMJ open* 2016;6(11)
20. Dorsey RR, Andresen EM, Moore TL. Health-related quality of life and support group attendance for patients with systemic lupus erythematosus. *JCR: Journal of Clinical Rheumatology* 2004;10(1):6-9.

21. Feldman CH, Bermas BL, Zibit M, et al. Designing an intervention for women with systemic lupus erythematosus from medically underserved areas to improve care: a qualitative study. *Lupus* 2013;22(1):52-62.
22. Flournoy-Floyd M, Ortiz K, Egede L, et al. "We Would Still Find Things to Talk About": Assessment of Mentor Perspectives in a Systemic Lupus Erythematosus Intervention to Improve Disease Self-Management, Empowering SLE Patients. *Journal of the National Medical Association* 2018;110(2):182-89.
23. Fortin PR. HIPP Learning to Live Better With Lupus: the Health Improvement and Prevention Program in Systemic Lupus Erythematosus 2007 [Available from: <https://clinicaltrials.gov/ct2/show/record/NCT00188357>].
24. Furness S, Bryan G, McMillan R, et al. Interventions for the management of dry mouth: non-pharmacological interventions. *Cochrane Database of Systematic Reviews* 2013(8)
25. Giguère A, Légaré F, Grimshaw J, et al. Printed educational materials: effects on professional practice and healthcare outcomes. *Cochrane Database of Systematic Reviews* 2012(10)
26. Gualano B, Pinto A, Perondi MB, et al. Therapeutic effects of exercise training in patients with pediatric rheumatic diseases. *Rev Bras Reumatol* 2011;51(5):490-96.
27. Gumuchian ST, Delisle VC, Kwakkenbos L, et al. Reasons for attending support groups and organizational preferences: the European scleroderma support group members survey. *Disability and rehabilitation* 2019;41(8):974-82.
28. Haythornthwaite JA. Psychological Treatments for Scleroderma 2017 [Available from: <https://clinicaltrials.gov/ct2/show/record/NCT00007267>].
29. Hoving JL, Lacaille D, Urquhart DM, et al. Non-pharmacological interventions for preventing job loss in workers with inflammatory arthritis. *Cochrane Database of Systematic Reviews* 2014(11)
30. Kelley GA, Kelley KS, Hootman JM. Effects of exercise on depression in adults with arthritis: a systematic review with meta-analysis of randomized controlled trials. *Arthritis research & therapy* 2015;17(1):21.
31. Kier AØ, Midtgaard J, Hougaard KS, et al. How do women with lupus manage fatigue? A focus group study. *Clinical rheumatology* 2016;35(8):1957-65.
32. Klyscz T, Rassner G, Guckenberger G, et al. Biomechanical stimulation therapy. *Rheumaderm*: Springer 1999:309-16.
33. Ko YJ, Lee YG, Park JW, et al. A comprehensive rehabilitation approach in a patient with serious neuropsychiatric systemic lupus erythematosus. *Annals of rehabilitation medicine* 2016;40(4):745.
34. Maddali-Bongi S, Del Rosso A. Systemic sclerosis: rehabilitation as a tool to cope with disability. *burns* 2016;14:15.
35. Merz EL, Malcarne VL, Hansdottir I, et al. A longitudinal analysis of humor coping and quality of life in systemic sclerosis. *Psychology, Health & Medicine* 2009;14(5):553-66.
36. Meunier B, Jourde-Chiche N, Mancini J, et al. Characteristics and information searched for by French patients with systemic lupus erythematosus: A web-community data-driven online survey. *Lupus* 2016;25(4):370-75.
37. Miossi R, Benatti FB, Lúciade de Sá Pinto A, et al. Using exercise training to counterbalance chronotropic incompetence and delayed heart rate recovery in systemic lupus erythematosus: a randomized trial. *Arthritis care & research* 2012;64(8):1159-66.
38. Miyamoto ST, Valim V, Carletti L, et al. Supervised walking improves cardiorespiratory fitness, exercise tolerance, and fatigue in women with primary Sjogren's syndrome: a randomized-controlled trial. *Rheumatol Int* 2019;39(2):227-38. doi: 10.1007/s00296-018-4213-z [published Online First: 2019/01/04]
39. Ng S, Clements P, Paulus H. Management of systemic sclerosis--a review. *Singapore medical journal* 1990;31(3):269-72.
40. Exercise and physical activity in systemic lupus erythematosus: a systematic review with meta-analyses. *Seminars in arthritis and rheumatism*; 2017. Elsevier.

41. Otterness S. Scleroderma: a case presentation. *Nephrology Nursing Journal* 2005;32(4):454.
42. Otterness S. Scleroderma: a case presentation. *Nephrology Nursing Journal* 2006;33(1):39.
43. Panchbhai A, Pawar S, Barad A, et al. Review of orofacial considerations of systemic sclerosis or scleroderma with report of analysis of 3 cases. *Indian journal of dentistry* 2016;7(3):134.
44. Peterson MG, Horton R, Engelhard E, et al. Effect of counselor training on skills development and psychosocial status of volunteers with systemic lupus erythematosus. *Arthritis & Rheumatism: Official Journal of the American College of Rheumatology* 1993;6(1):38-44.
45. Telemedicine for patients with rheumatic diseases: systematic review and proposal for research agenda. *Seminars in arthritis and rheumatism*; 2017. Elsevier.
46. Poiraudau S. Effects of a Personalized Standardized Rehabilitation Program on the Quality of Life of Patients With Systemic Sclerosis Patients : a Randomized Controlled Trial 2018
47. Poole JL. Musculoskeletal rehabilitation in the person with scleroderma. *Current opinion in rheumatology* 2010;22(2):205-12.
48. Poole JL, MacIntyre NJ, deBoer HN. Evidence-based management of hand and mouth disability in a woman living with diffuse systemic sclerosis (Scleroderma). *Physiotherapy Canada* 2013;65(4):317-20.
49. Ramos-Remus C, Salcedo-Rocha AL, Prieto-Parra RE, et al. How important is patient education? *Best Practice & Research Clinical Rheumatology* 2000;14(4):689-703.
50. Rhee RL, Von Feldt JM, Schumacher HR, et al. Readability and suitability assessment of patient education materials in rheumatic diseases. *Arthritis care & research* 2013;65(10):1702-06.
51. Riksen RJE, Smeets RJEM, Bakx WGM, et al. Rehabilitation in systemic sclerosis. A case-report and a review of the literature. 1992
52. Rizk T, Park S. Transcutaneous electrical nerve stimulation and extensor splint in linear scleroderma knee contracture. *Archives of physical medicine and rehabilitation* 1981;62(2):86-88.
53. Roberts NW. Randomized Study of Individualized Instruction Versus Pamphlet in Systemic Lupus Erythematosus 2005 [Available from: <https://clinicaltrials.gov/ct2/show/record/NCT00004756>.
54. Rudolph R, RI R, JJ L, et al. Efficacy of psychiatric management of linear scleroderma. 1974
55. Ryan S. The role of the nurse in the management of scleroderma. *Nursing Standard* 1996;10(48):39-42.
56. Scalzi LV, Hollenbeak CS, Mascuilli E, et al. Improvement of medication adherence in adolescents and young adults with SLE using web-based education with and without a social media intervention, a pilot study. *Pediatric Rheumatology* 2018;16(1):18.
57. Schouffoer A, Ndosi ME, Vlieland TPV, et al. The educational needs of people with systemic sclerosis: a cross-sectional study using the Dutch version of the Educational Needs Assessment Tool (D-ENAT). *Rheumatology international* 2016;36(2):289-94.
58. Stefanantoni K, Sciarra I, Iannace N, et al. Occupational therapy integrated with a self-administered stretching program on systemic sclerosis patients with hand involvement. *Clinical and experimental rheumatology* 2016;34(5):157-61.
59. Strombeck B, Jacobsson LT. The role of exercise in the rehabilitation of patients with systemic lupus erythematosus and patients with primary Sjogren's syndrome. *Current opinion in rheumatology* 2007;19(2):197-203.
60. Sutton J, Navarro A, Stevens M. Systemic lupus erythematosus XI: Nonpharmacological management. *Maryland state medical journal* 1984;33(6):469-72.
61. Takei S, Hokonohara M. Quality of life and daily management of children with rheumatic disease. *Acta paediatrica Japonica: Overseas edition* 1993;35(5):454-63.
62. Tench C, Bentley D, Vleck V, et al. Aerobic fitness, fatigue, and physical disability in systemic lupus erythematosus. *The Journal of rheumatology* 2002;29(3):474-81.
63. Thomas JL. Helpful or harmful? Potential effects of exercise on select inflammatory conditions. *The Physician and sportsmedicine* 2013;41(4):93-100.

64. Tiffreau V, Rannou F, Kopciuch F, et al. Postrehabilitation functional improvements in patients with inflammatory myopathies: the results of a randomized controlled trial. *Archives of physical medicine and rehabilitation* 2017;98(2):227-34.
65. Ting W, Sontheimer R. Local therapy for cutaneous and systemic lupus erythematosus: practical and theoretical considerations. *Lupus* 2001;10(3):171-84.
66. Van Dessel N, Den Boeft M, van der Wouden JC, et al. Non-pharmacological interventions for somatoform disorders and medically unexplained physical symptoms (MUPS) in adults. *Cochrane Database of Systematic Reviews* 2014(11)
67. White J. Teaching patients to manage systemic lupus erythematosus. *Nursing* 78 1978;8(9):26-34.
68. White J, Ziegler G. Patient management of systemic lupus erythematosus. *Critical care update* 1980;7(8):5-15.
69. Willems LM, Vriezেকolk JE, Schouffoer AA, et al. Effectiveness of nonpharmacologic interventions in systemic sclerosis: a systematic review. *Arthritis care & research* 2015;67(10):1426-39.
70. Williams EM, Egede L, Faith T, et al. Effective self-management interventions for patients with lupus: potential impact of peer mentoring. *The American journal of the medical sciences* 2017;353(6):580-92.
71. Management of scleroderma. Mayo Clinic Proceedings; 1971.
72. Yuen HK, Cunningham MA. Optimal management of fatigue in patients with systemic lupus erythematosus: a systematic review. *Therapeutics and clinical risk management* 2014;10:775.
73. Yuen HK, Breland HL, Vogtle LK, et al. The process associated with motivation of a home-based Wii Fit exercise program among sedentary African American women with systemic lupus erythematosus. *Disability and health journal* 2013;6(1):63-68.
74. da Hora TC, Lima K, Maciel R. The effect of therapies on the quality of life of patients with systemic lupus erythematosus: a meta-analysis of randomized trials. *Advances in Rheumatology* 2019 Jul 29;59(34):Epub 2019
75. Dantas LO, Weber S, Osani MC, et al. Mobile health technologies for the management of systemic lupus erythematosus: a systematic review. *Lupus* 2020;29(2):144-56. doi: 10.1177/0961203319897139
76. Durcan L, O'Dwyer T, Petri M. Management strategies and future directions for systemic lupus erythematosus in adults. *Lancet* 2019;393(10188):2332-43. doi: 10.1016/s0140-6736(19)30237-5 [published Online First: 2019/06/11]
77. Fangtham M, Nash JL, Hyon S, et al. Nonpharmacological treatment on fatigue, depression, disease activity, and quality of life of systemic lupus erythematosus: A systematic review. *Global Advances in Health and Medicine* 2018;7:100-01. doi: 10.1177/2164956118773837
78. Fangtham M, Kasturi S, Bannuru RR, et al. Non-pharmacologic therapies for systemic lupus erythematosus. *Lupus* 2019;28(6):703-12. doi: 10.1177/0961203319841435
79. Fuentes-Silva Y, Elera-Fitzcarrald C, Reátegui-Sokolova C, et al. Let's talk about lupus live video chats with an expert: An interactive facebook resource for patient education about lupus. *Journal of Clinical Rheumatology* 2019;25(3):S22-S23. doi: 10.1097/RHU.0000000000001070
80. Hoe VCW, Urquhart DM, Kelsall HL, et al. Ergonomic interventions for preventing work-related musculoskeletal disorders of the upper limb and neck among office workers. *Cochrane Database of Systematic Reviews* 2018(10) doi: 10.1002/14651858.CD008570.pub3
81. Hulme K, Safari R, Thomas S, et al. Fatigue interventions in long term, physical health conditions: A scoping review of systematic reviews. *PLoS ONE* 2018;13(10) doi: 10.1371/journal.pone.0203367
82. Kearns G, Fernández-De-Las-Peñas C, Brismée JM, et al. New perspectives on dry needling following a medical model: are we screening our patients sufficiently? *Journal of Manual and Manipulative Therapy* 2019;27(3):172-79. doi: 10.1080/10669817.2019.1567011
83. Kocher A, Simon M, Dwyer AA, et al. Developing a rare disease chronic care model: Management of systemic sclerosis (MANOSS) study protocol. *Journal of Advanced Nursing (John Wiley & Sons, Inc)* 2019;75(12):3774-91. doi: 10.1111/jan.14185

84. Kusnanto K, Sari NPWP, Harmayetty H, et al. Self-care model application to improve self-care agency, self-care activities, and quality of life in patients with systemic lupus erythematosus. *Journal of Taibah University Medical Sciences* 2018;13(5):472-78. doi: 10.1016/j.jtumed.2018.07.002
85. Kwakkenbos L, Carrier ME, Boutron I, et al. Randomized feasibility trial of the scleroderma patient-centered intervention network hand exercise program (SPIN-HAND). *Journal of Scleroderma and Related Disorders* 2018;3:204. doi: 10.1177/2397198317753474
86. Liem SIE, Vliet Vlieland TPM, Schoones JW, et al. The effect and safety of exercise therapy in patients with systemic sclerosis: a systematic review. *Rheumatol Adv Pract* 2019;3(2):rkz044. doi: 10.1093/rap/rkz044 [published Online First: 2019/12/21]
87. Mitropoulos A, Gumber A, Crank H, et al. Investigating the effectiveness and feasibility of exercise on microvascular reactivity and quality of life in systemic sclerosis patients: study protocol for a feasibility study. *Trials* 2018;19(1):N.PAG-N.PAG. doi: 10.1186/s13063-018-2980-1
88. Mitropoulos A, Gumber A, Crank H, et al. The effects of upper and lower limb exercise on the microvascular reactivity in limited cutaneous systemic sclerosis patients. *Arthritis Research and Therapy* 2018;20(1) doi: 10.1186/s13075-018-1605-0
89. Mugii N, Matsushita T, Oohata S, et al. Long-term follow-up of finger passive range of motion in Japanese systemic sclerosis patients treated with self-administered stretching. *Modern Rheumatology* 2019;29(3):484-90. doi: 10.1080/14397595.2018.1466635
90. Mugii N, Hamaguchi Y, Maddali-Bongi S. Clinical significance and usefulness of rehabilitation for systemic sclerosis. *Journal of Scleroderma and Related Disorders* 2018;3(1):71-80. doi: 10.1177/2397198317750043
91. Murphy SL, Barber MW, Homer K, et al. Occupational Therapy Treatment to Improve Upper Extremity Function in Individuals with Early Systemic Sclerosis: A Pilot Study. *Arthritis Care & Research* 2018;70(11):1653-60. doi: 10.1002/acr.23522
92. Phillip CR, Mancera-Cuevas K, Leatherwood C, et al. Implementation and dissemination of an African American popular opinion model to improve lupus awareness: an academic-community partnership. *Lupus* 2019;28(12):1441-51. doi: 10.1177/0961203319878803 [published Online First: 2019/10/09]
93. Poole JL, Bradford JD, Siegel P. Effectiveness of Occupational Therapy Interventions for Adults With Systemic Lupus Erythematosus: A Systematic Review. *American Journal of Occupational Therapy* 2019;73(4):1-21. doi: 10.5014/ajot.2019.030619
94. Rice DB, Thombs BD. Support Groups in Scleroderma. *Current Rheumatology Reports* 2019;21(4) doi: 10.1007/s11926-019-0808-y
95. Sieczkowska SM, Coimbra DR, Vilarino GT, et al. Effects of resistance training on the health-related quality of life of patients with rheumatic diseases: systematic review with meta-analysis and meta-regression. *Seminars in Arthritis and Rheumatism* 2020 Apr;50(2):342-353 2020
96. Smith E, Pauling JD. The efficacy of dietary intervention on gastrointestinal involvement in systemic sclerosis: A systematic literature review. *Seminars in Arthritis & Rheumatism* 2019;49(1):112-18. doi: 10.1016/j.semarthrit.2018.12.001
97. Špiritović M, Štorkánová H, Oreská S, et al. Non-pharmacological treatment in systemic sclerosis. *Ceska Revmatologie* 2018;26(1):34-44.
98. Teng YKO, Bredewold EOW, Rabelink TJ, et al. An evidence-based approach to pre-pregnancy counselling for patients with systemic lupus erythematosus. *Rheumatology* 2018;57(10):1707-20. doi: 10.1093/rheumatology/kex374
99. Thombs BD, Aguila K, Dyas L, et al. Protocol for a partially nested randomized controlled trial to evaluate the effectiveness of the Scleroderma Patient-centered Intervention Network Support Group Leader Education (SPIN-SSLED) Program. *Trials* 2019;20(1) doi: 10.1186/s13063-019-3747-z

100. Thombs BD, Dyas L, Pépin M, et al. Scleroderma Patient-centered Intervention Network-Scleroderma Support group Leader EDucation (SPIN-SSLED) program: Non-randomised feasibility trial. *BMJ Open* 2019;9(11) doi: 10.1136/bmjopen-2019-029935
101. Thombs BD, Kwakkenbos L, Carrier ME, et al. Protocol for a partially nested randomised controlled trial to evaluate the effectiveness of the scleroderma patient-centered intervention network COVID-19 home-isolation activities together (SPIN-CHAT) program to reduce anxiety among at-risk scleroderma patients. *Journal of Psychosomatic Research* 2020;135 doi: 10.1016/j.jpsychores.2020.110132
102. Timóteo RP, Silva AF, Micheli DC, et al. Increased flexibility, pain reduction and unaltered levels of IL-10 and CD11b + lymphocytes in patients with systemic lupus erythematosus were associated with kinesiotherapy. *Lupus* 2018;27(7):1159-68. doi: 10.1177/0961203318768880
103. Tisseverasinghe A, Peschken C, Hitchon C. Anxiety and Mood Disorders in Systemic Lupus Erythematosus: Current Insights and Future Directions. *Current Rheumatology Reports* 2018;20(12) doi: 10.1007/s11926-018-0797-2
