# Supplementary material for: Suitability for e-health of non-pharmacological interventions in connective tissue diseases: scoping review with a descriptive analysis
Source: HighWire-hosted journal article supplement (doi:10.1136/rmdopen-2021-001710), 2021-07-01
Supplement: rmdopen-2021-001710supp003_data_supplement.pdf [file rmdopen-2021-001710supp003_data_supplement.pdf]

**Supplement 3:** The quality of the RCTs found was assessed using the RoB 2.<sup>1</sup>

| Author                          | Diagnosis | Experimental                                                                              | Comparator             | (primary) Outcome                                                                      | Randomization process | Deviations from intended interventions | Missing outcome data | Measurement of the outcome | Selection of the reported result | Overall |
|---------------------------------|-----------|-------------------------------------------------------------------------------------------|------------------------|----------------------------------------------------------------------------------------|-----------------------|----------------------------------------|----------------------|----------------------------|----------------------------------|---------|
| Allaire, et al. <sup>2</sup>    | SLE       | Job retention intervention                                                                | Written materials only | Job loss events                                                                        | ?                     | —                                      | —                    | +                          | ?                                | —       |
| Austin, et al. <sup>3</sup>     | SLE       | Telephone intervention                                                                    | Symptom monitoring     | Health outcomes (general)                                                              | ?                     | —                                      | +                    | +                          | ?                                | —       |
| Avaux, et al. <sup>4</sup>      | SLE       | Supervised training (ST), home training (HT)                                              | No intervention        | Fatigue                                                                                | —                     | —                                      | —                    | +                          | ?                                | —       |
| Benatti, et al. <sup>5</sup>    | SLE       | Exercise training                                                                         | No intervention        | Lipid profile, composition of high-density lipoprotein (HDL)                           | —                     | —                                      | +                    | +                          | +                                | —       |
| Berdal, et al. <sup>6</sup>     | SLE       | Add-on structured goal-planning and supportive telephone follow-up rehabilitation program | Usual Care             | Quality of life                                                                        | +                     | +                                      | —                    | —                          | +                                | —       |
| Bogdanovic, et al. <sup>7</sup> | SLE       | Aerobic exercises                                                                         | Isotonic exercises     | Quality of life                                                                        | —                     | —                                      | +                    | +                          | ?                                | —       |
| Boström, et al. <sup>8</sup>    | SLE       | Physical activity                                                                         | Usual care             | Aerobic capacity                                                                       | —                     | +                                      | +                    | +                          | +                                | —       |
| Brown, et al. <sup>9</sup>      | SLE       | Cognitive behavioral therapy/ Education only                                              | No intervention        | Pain, disease adjustment and adaptation, quality of life                               | ?                     | ?                                      | +                    | +                          | ?                                | !       |
| Daltroy, et al. <sup>10</sup>   | SLE       | Exercise prescription and unsupervised home exercise                                      | No intervention        | Exercise tolerance, fatigue, depression, helplessness                                  | —                     | —                                      | —                    | +                          | ?                                | —       |
| Dobkin, et al. <sup>11</sup>    | SLE       | Brief supportive expressive group psychotherapy                                           | Usual care             | Psychological distress, medical symptoms, health care costs, improving quality of life | ?                     | ?                                      | —                    | +                          | ?                                | —       |
| Edworthy, et al. <sup>12</sup>  | SLE       | Brief supportive-expressive group psychotherapy                                           | Usual care             | Reduce illness-induced interference with valued activities and interests               | ?                     | ?                                      | +                    | +                          | ?                                | !       |

| Author                                    | Diagnosis | Experimental                                                                   | Comparator                                   | (primary) Outcome                                                                                                                                                    | Randomization process | Deviations from intended interventions | Missing outcome data | Measurement of the outcome | Selection of the reported result | Overall |
|-------------------------------------------|-----------|--------------------------------------------------------------------------------|----------------------------------------------|----------------------------------------------------------------------------------------------------------------------------------------------------------------------|-----------------------|----------------------------------------|----------------------|----------------------------|----------------------------------|---------|
| Greco, et al. <sup>13</sup>               | SLE       | Stress-reduction program                                                       | Usual care, symptom monitoring               | Pain, psychological function, physical function                                                                                                                      | ?                     | +                                      | +                    | +                          | ?                                | !       |
| Kankaya and Karadakovan <sup>14</sup>     | SLE       | Web-based education and counselling                                            | Usual Care                                   | Self-efficacy                                                                                                                                                        | ?                     | ?                                      | ?                    | ?                          | ?                                | !       |
| Karlson, et al. <sup>15</sup>             | SLE       | Psychoeducational intervention                                                 | Attention intervention                       | Patient self-efficacy and partner support                                                                                                                            | ?                     | ?                                      | +                    | +                          | ?                                | !       |
| Keramiotou, et al. <sup>16</sup>          | SLE       | Individually tailored 30-min daily upper-limb exercise programme               | Usual Care                                   | Function                                                                                                                                                             | -                     | +                                      | +                    | +                          | +                                | -       |
| Li, et al. <sup>17</sup>                  | SLE       | Physical Activity Counselling Program with Use of Wearable Tracker             | same intervention (delayed)                  | Physical activity                                                                                                                                                    | ?                     | +                                      | +                    | +                          | +                                | !       |
| Maisiak, et al. <sup>18</sup>             | SLE       | Telephone-based counseling                                                     | Usual care                                   | Psychological status                                                                                                                                                 | ?                     | ?                                      | +                    | +                          | ?                                | !       |
| Navarrete-Navarrete, et al. <sup>19</sup> | SLE       | Cognitive-behavioural intervention                                             | Usual care                                   | Stress reduction                                                                                                                                                     | ?                     | ?                                      | -                    | ?                          | ?                                | -       |
| Prado, et al. <sup>20</sup>               | SLE       | Supervised aerobic training program                                            | No intervention control AND healthy controls | Cardiorespiratory capacity                                                                                                                                           | -                     | -                                      | +                    | +                          | +                                | -       |
| Ramsey-Goldman, et al. <sup>21</sup>      | SLE       | Aerobic exercise group                                                         | ROM exercise group                           | Fatigue, functional status, lupus disease activity and prednisone dose, cardiovascular fitness, isometric strength, bone mineral density, bone biomechanical markers | ?                     | ?                                      | +                    | -                          | ?                                | -       |
| Rimmer, et al. <sup>37</sup>              | SLE       | Personalized Online Weight and Exercise Response System (POWERS) and POWERplus | Recommendation to exercise from physician    | Body weight                                                                                                                                                          | -                     | -                                      | -                    | +                          | ?                                | -       |
| Tench, et al. <sup>40</sup>               | SLE       | Graded exercise group, relaxation group                                        | No intervention                              | Fatigue                                                                                                                                                              | ?                     | -                                      | +                    | ?                          | ?                                | -       |

| Author                              | Diagnosis | Experimental                                                                   | Comparator                                                | (primary) Outcome                                                          | Randomization process | Deviations from intended interventions | Missing outcome data | Measurement of the outcome | Selection of the reported result | Overall |
|-------------------------------------|-----------|--------------------------------------------------------------------------------|-----------------------------------------------------------|----------------------------------------------------------------------------|-----------------------|----------------------------------------|----------------------|----------------------------|----------------------------------|---------|
| Wu, et al. <sup>42</sup>            | SLE       | Physical activity counselling                                                  | Usual Care                                                | Physical activity                                                          | +                     | +                                      | +                    | +                          | ?                                | !       |
| Xie, et al. <sup>43</sup>           | SLE       | Transitional care (Omaha System)                                               | Usual care                                                | Self-care, quality of life                                                 | +                     | +                                      | +                    | +                          | +                                | +       |
| Filippetti, et al. <sup>22</sup>    | SSc       | home-based minimally supervised exercise program                               | Usual Care                                                | Function                                                                   | ?                     | +                                      | +                    | +                          | ?                                | !       |
| Freedman, et al. <sup>23</sup>      | SSc       | Autogenic training                                                             | Finger temperature biofeedback, frontalis EMG biofeedback | Microcirculation                                                           | ?                     | -                                      | -                    | ?                          | ?                                | -       |
| Gregory, et al. <sup>24</sup>       | SSc       | Daily hand exercises with daily home wax bath hand treatment                   | Usual Care                                                | Function                                                                   | +                     | ?                                      | +                    | +                          | ?                                | !       |
| Khanna, et al. <sup>25</sup>        | SSc       | Internet-based self-management program                                         | Educational book                                          | Self-efficacy                                                              | ?                     | +                                      | +                    | +                          | +                                | !       |
| Kristensen, et al. <sup>26</sup>    | SSc       | Self-administered paraffin bath and exercises                                  | Lukewarm water prior to hand exercises                    | Function                                                                   | +                     | ?                                      | +                    | +                          | ?                                | !       |
| Maddali-Bongi, et al. <sup>27</sup> | SSc       | Manual lymph drainage                                                          | No intervention                                           | reducing edema, functionality of the hands, quality of life and disability | +                     | ?                                      | -                    | +                          | ?                                | -       |
| Maddali-Bongi, et al. <sup>28</sup> | SSc       | Combination of connective tissue massage and Mc Mennell joint manipulation     | Home exercises                                            | Hand function                                                              | ?                     | +                                      | +                    | ?                          | +                                | !       |
| Maddali-Bongi, et al. <sup>29</sup> | SSc       | District specific and global rehabilitation program                            | No intervention                                           | Patients' global health condition, specific body districts                 | ?                     | -                                      | +                    | ?                          | +                                | -       |
| Maddali-Bongi, et al. <sup>30</sup> | SSc       | Combination of Kabat's technique, connective tissue massage and kinesiotherapy | Home exercise program alone                               | Face functioning                                                           | ?                     | +                                      | +                    | ?                          | ?                                | !       |
| Mitropoulos, et al. <sup>31</sup>   | SSc       | High-intensity interval training cycling (CE) and arm cranking (ACE)           | No intervention                                           | Microcirculation of the digital area                                       | ?                     | ?                                      | +                    | +                          | +                                | !       |

| Author                                                                   | Diagnosis | Experimental                                                                   | Comparator                        | (primary) Outcome                                  | Randomization process | Deviations from intended interventions | Missing outcome data | Measurement of the outcome | Selection of the reported result | Overall |
|--------------------------------------------------------------------------|-----------|--------------------------------------------------------------------------------|-----------------------------------|----------------------------------------------------|-----------------------|----------------------------------------|----------------------|----------------------------|----------------------------------|---------|
| Mitropoulos, et al. <sup>32</sup> ,<br>Mitropoulos, et al. <sup>33</sup> | SSc       | High-intensity interval training (HIIT) combined with resistance training (RT) | No intervention                   | Microcirculation                                   | +                     | +                                      | +                    | +                          | +                                | +       |
| Naylor, et al. <sup>34</sup>                                             | SSc       | Facial exercises                                                               | Facial grimacing                  | Mouth opening                                      | ?                     | -                                      | -                    | -                          | ?                                | -       |
| Piga, et al. <sup>35</sup>                                               | SSc       | Telemonitoring approach to self-managed kinesiotherapy sessions                | Kinesiotherapy without monitoring | Hand function                                      | ?                     | ?                                      | -                    | -                          | ?                                | -       |
| Rannou, et al. <sup>36</sup>                                             | SSc       | Physical therapy program                                                       | Usual care                        | Disability                                         | +                     | +                                      | +                    | +                          | +                                | +       |
| Sandqvist, et al. <sup>38</sup>                                          | SSc       | Paraffin bath in combination with hand exercises                               | Hand exercises only               | Function                                           | -                     | -                                      | +                    | -                          | ?                                | -       |
| Schouffoer, et al. <sup>39</sup>                                         | SSc       | Multidisciplinary team care program                                            | Usual care                        | Body function, functional ability, quality of live | ?                     | -                                      | +                    | ?                          | ?                                | -       |
| Uras, et al. <sup>41</sup>                                               | SSc       | Educational materials and a specific "face-to-face" interventions              | Educational material              | Mouth opening                                      | +                     | +                                      | +                    | +                          | +                                | +       |
| Yuen, et al. <sup>44,45</sup>                                            | SSc       | Home orofacial exercise program                                                | Usual Care                        | Mouth opening                                      | ?                     | ?                                      | +                    | +                          | ?                                | !       |

## References

1. Sterne J, Savović J, Page M, et al. RoB 2: a revised tool for assessing risk of bias in randomised trials. *BMJ* 2019;366:14898.
2. Allaire SH, Niu J, LaValley MP. Employment and satisfaction outcomes from a job retention intervention delivered to persons with chronic diseases. *Rehabilitation Counseling Bulletin* 2005;48(2):100-09.
3. Austin JS, Maisiak RS, Macrina DM, et al. Health outcome improvements in patients with systemic lupus erythematosus using two telephone counseling interventions. *Arthritis & Rheumatism: Official Journal of the American College of Rheumatology* 1996;9(5):391-99.
4. Avaux M, Hoellinger P, Nieuwland-Husson S, et al. Effects of two different exercise programs on chronic fatigue in lupus patients. *Acta Clinica Belgica* 2016;71(6):403-06.
5. Benatti FB, Miozzi R, Passarelli M, et al. The effects of exercise on lipid profile in systemic lupus erythematosus and healthy individuals: a randomized trial. *Rheumatology international* 2015;35(1):61-69.
6. Berdal G, Ingvild Bø, Dager TN, et al. Structured Goal Planning and Supportive Telephone Follow-up in Rheumatology Care: Results From a Pragmatic, Stepped-Wedge, Cluster-Randomized Trial. *Arthritis Care and Research* 2018;70(11):1576-86. doi: 10.1002/acr.23520
7. Bogdanovic G, Stojanovich L, Djokovic A, et al. Physical activity program is helpful for improving quality of life in patients with systemic lupus erythematosus. *The Tohoku journal of experimental medicine* 2015;237(3):193-99.
8. Boström C, Elfving B, Dupre B, et al. Effects of a one-year physical activity programme for women with systemic lupus erythematosus—a randomized controlled study. *Lupus* 2016;25(6):602-16.
9. Brown RT, Shaftman SR, Tilley BC, et al. The health education for lupus study: a randomized controlled cognitive-behavioral intervention targeting psychosocial adjustment and quality of life in adolescent females with systemic lupus erythematosus. *The American journal of the medical sciences* 2012;344(4):274-82.
10. Daltroy L, Robb-Nicholson C, Iversen M, et al. Effectiveness of minimally supervised home aerobic training in patients with systemic rheumatic disease. *Rheumatology* 1995;34(11):1064-69.
11. Dobkin PL, Da Costa D, Joseph L, et al. Counterbalancing patient demands with evidence: results from a pan-Canadian randomized clinical trial of brief supportive-expressive group psychotherapy for women with systemic lupus erythematosus. *Annals of Behavioral Medicine* 2002;24(2):88-99.
12. Edworthy SM, Dobkin PL, Clarke AE, et al. Group psychotherapy reduces illness intrusiveness in systemic lupus erythematosus. *The Journal of rheumatology* 2003;30(5):1011-16.
13. Greco CM, Rudy TE, Manzi S. Effects of a stress-reduction program on psychological function, pain, and physical function of systemic lupus erythematosus patients: A randomized controlled trial. *Arthritis Care & Research* 2004;51(4):625-34.
14. Kankaya H, Karadakovan A. Effects of web-based education and counselling for patients with systemic lupus erythematosus: self-efficacy, fatigue and assessment of care. *Lupus* 2020;29(8):884-91. doi: 10.1177/0961203320928423 [published Online First: 2020/06/02]
15. Karlson EW, Liang MH, Eaton H, et al. A randomized clinical trial of a psychoeducational intervention to improve outcomes in systemic lupus erythematosus. *Arthritis & Rheumatism: Official Journal of the American College of Rheumatology* 2004;50(6):1832-41.

16. Keramiotou K, Anagnostou C, Kataxaki E, et al. The impact of upper limb exercise on function, daily activities and quality of life in systemic lupus erythematosus: A pilot randomised controlled trial. *RMD Open* 2020;6(1) doi: 10.1136/rmdopen-2019-001141
17. Li LC, Feehan LM, Xie H, et al. Efficacy of a physical activity counselling program with use of wearable tracker in people with inflammatory arthritis: a randomized controlled trial [with consumer summary]. *Arthritis Care & Research* 2020 Apr 5:Epub ahead of print 2020
18. Maisiak R, Austin J, West S, et al. The effect of person-centered counseling on the psychological status of persons with systemic lupus erythematosus or rheumatoid arthritis. A randomized, controlled trial. *Arthritis & Rheumatism: Official Journal of the American College of Rheumatology* 1996;9(1):60-66.
19. Navarrete-Navarrete N, Peralta-Ramírez M, Sabio-Sánchez J, et al. Efficacy of cognitive behavioural therapy for the treatment of chronic stress in patients with lupus erythematosus: a randomized controlled trial. *Psychotherapy and psychosomatics* 2010;79(2):107-15.
20. Prado DM, Benatti FB, de Sá-Pinto AL, et al. Exercise training in childhood-onset systemic lupus erythematosus: a controlled randomized trial. *Arthritis research & therapy* 2013;15(2):R46.
21. Ramsey-Goldman R, Schilling EM, Dunlop D, et al. A pilot study on the effects of exercise in patients with systemic lupus erythematosus. *Arthritis Care & Research* 2000;13(5):262-69.
22. Filippetti M, Cazzoletti L, Zamboni F, et al. Effect of a tailored home-based exercise program in patients with systemic sclerosis: a randomized controlled trial. *Scandinavian Journal of Medicine & Science in Sports* 2020 Apr 29:Epub ahead of print 2020
23. Freedman RR, Ianni P, Wenig P. Behavioral treatment of Raynaud's phenomenon in scleroderma. *Journal of behavioral medicine* 1984;7(4):343-53.
24. Gregory WJ, Wilkinson J, Herrick AL. A randomised controlled trial of wax baths as an additive therapy to hand exercises in patients with systemic sclerosis. *Physiotherapy* 2019;105(3):370-77. doi: 10.1016/j.physio.2018.08.008
25. Khanna D, Serrano J, Berrocal VJ, et al. Randomized Controlled Trial to Evaluate an Internet-Based Self-Management Program in Systemic Sclerosis. *Arthritis care & research* 2019;71(3):435-47.
26. Kristensen LQ, Oestergaard LG, Bovbjerg K, et al. Use of paraffin instead of lukewarm water prior to hand exercises had no additional effect on hand mobility in patients with systemic sclerosis: a randomized clinical trial. *Hand Therapy* 2019 Mar;24(1):13-21 2019
27. Maddali-Bongi S, Del Rosso A, Passalacqua M, et al. Manual lymph drainage improving upper extremity edema and hand function in patients with systemic sclerosis in edematous phase. *Arthritis care & research* 2011;63(8):1134-41.
28. Maddali-Bongi S, Del Rosso A, Galluccio F, et al. Efficacy of connective tissue massage and Mc Mennell joint manipulation in the rehabilitative treatment of the hands in systemic sclerosis. *Clinical rheumatology* 2009;28(10):1167-73.
29. Maddali-Bongi S, Del Rosso A, Galluccio F, et al. Efficacy of a tailored rehabilitation program for systemic sclerosis. *Clinical & Experimental Rheumatology* 2009;27(3):S44.
30. Maddali-Bongi S, Landi G, Galluccio F, et al. The rehabilitation of facial involvement in systemic sclerosis: efficacy of the combination of connective tissue massage, Kabat's technique and kinesitherapy: a randomized controlled trial. *Rheumatology international* 2011;31(7):895-901.
31. Mitropoulos A, Gumber A, Crank H, et al. The effects of upper and lower limb exercise on the microvascular reactivity in limited cutaneous systemic sclerosis patients. *Arthritis research & therapy* 2018;20(1):112.
32. Mitropoulos A, Gumber A, Akil M, et al. Exploring the microcirculatory effects of an exercise programme including aerobic and resistance training in people with limited cutaneous systemic sclerosis. *Microvasc Res* 2019;125:103887. doi: 10.1016/j.mvr.2019.103887 [published Online First: 2019/06/21]

33. Mitropoulos A, Gumber A, Crank H, et al. Exploring the feasibility of an exercise programme including aerobic and resistance training in people with limited cutaneous systemic sclerosis [with consumer summary]. *Clinical Rheumatology* 2020 Jun;39(6):1889-1898 2020
34. Naylor WP, Douglass CW, Mix E. The nonsurgical treatment of microstomia in scleroderma: a pilot study. *Oral surgery, oral medicine, oral pathology* 1984;57(5):508-11.
35. Piga M, Tradori I, Pani D, et al. Telemedicine applied to kinesiotherapy for hand dysfunction in patients with systemic sclerosis and rheumatoid arthritis: recovery of movement and telemonitoring technology. *The Journal of rheumatology* 2014;41(7):1324-33.
36. Rannou F, Boutron I, Mouthon L, et al. Personalized physical therapy versus usual care for patients with systemic sclerosis: a randomized controlled trial. *Arthritis care & research* 2017;69(7):1050-59.
37. Rimmer JH, Wang E, Pellegrini CA, et al. Telehealth weight management intervention for adults with physical disabilities: a randomized controlled trial. *American journal of physical medicine & rehabilitation* 2013;92(12):1084-94.
38. Sandqvist G, Åkesson A, Eklund M. Evaluation of paraffin bath treatment in patients with systemic sclerosis. *Disability and rehabilitation* 2004;26(16):981-87.
39. Schouffoer A, Ninaber M, Beart-van de Voorde L, et al. Randomized comparison of a multidisciplinary team care program with usual care in patients with systemic sclerosis. *Arthritis care & research* 2011;63(6):909-17.
40. Tench C, McCarthy J, McCurdie I, et al. Fatigue in systemic lupus erythematosus: a randomized controlled trial of exercise. *Rheumatology* 2003;42(9):1050-54.
41. Uras C, Mastroeni S, Tabolli S, et al. A comparison between two educational methods in the rehabilitation of the microstomia in systemic sclerosis: A randomized controlled trial. *Clinical Rehabilitation* 2019;33(11):1747-56.
42. Wu ML, Tsai JC, Yu KH, et al. Effects of physical activity counselling in women with systemic lupus erythematosus: A randomized controlled trial. *International Journal of Nursing Practice (John Wiley & Sons, Inc)* 2019;25(5):N.PAG-N.PAG. doi: 10.1111/ijn.12770
43. Xie X, Song Y, Yang H, et al. Effects of transitional care on self-care, readmission rates, and quality of life in adult patients with systemic lupus erythematosus: a randomized controlled trial. *Arthritis research & therapy* 2018;20(1):184.
44. Yuen HK, Marlow NM, Reed SG, et al. Effect of orofacial exercises on oral aperture in adults with systemic sclerosis. *Disability and rehabilitation* 2012;34(1):84-89.
45. Yuen HK, Weng Y, Bandyopadhyay D, et al. Effect of a multi-faceted intervention on gingival health among adults with systemic sclerosis. *Clinical and experimental rheumatology* 2011;29(2 Suppl 65):S26.
