# Supplementary material for: Suitability for e-health of non-pharmacological interventions in connective tissue diseases: scoping review with a descriptive analysis
Source: HighWire-hosted journal article supplement (doi:10.1136/rmdopen-2021-001710), 2021-07-01
Supplement: rmdopen-2021-001710supp004_data_supplement.pdf [file rmdopen-2021-001710supp004_data_supplement.pdf]

## Supplement 4. Characteristics of included studies.

| Study; Year; Design; Country                                                                                | Population                                                                                         | Intervention; Primary Outcome                                                                                                                                                | Measurement                                                                                                                                                                                                                                                                                          | n IG <sup>+</sup><br>Mean age (±SD) <sup>φ</sup> | n CG <sup>+</sup><br>Mean age (±SD) <sup>φ</sup><br>Control intervention | Results                                                                                                                                                                                                                                                                                                                                                                                                                                                                                                                                                                                                                                                                                                                                                                                                                                                                                                                                                                                                                                                                                                                               | Adverse effects                  |
|-------------------------------------------------------------------------------------------------------------|----------------------------------------------------------------------------------------------------|------------------------------------------------------------------------------------------------------------------------------------------------------------------------------|------------------------------------------------------------------------------------------------------------------------------------------------------------------------------------------------------------------------------------------------------------------------------------------------------|--------------------------------------------------|--------------------------------------------------------------------------|---------------------------------------------------------------------------------------------------------------------------------------------------------------------------------------------------------------------------------------------------------------------------------------------------------------------------------------------------------------------------------------------------------------------------------------------------------------------------------------------------------------------------------------------------------------------------------------------------------------------------------------------------------------------------------------------------------------------------------------------------------------------------------------------------------------------------------------------------------------------------------------------------------------------------------------------------------------------------------------------------------------------------------------------------------------------------------------------------------------------------------------|----------------------------------|
| Alexanderson, et al. <sup>1</sup> ; 2014; single-subject experimental design with repeated measures; Sweden | SSc<br>IG n=3<br>CG n=1                                                                            | Intensive aerobic exercise and muscle endurance training program;<br>1) Function                                                                                             | 1) Six Minute walk test (6MWT)                                                                                                                                                                                                                                                                       | n=4<br><br>Median age = 66.5 (range 41–69)       | n.a.                                                                     | After eight weeks of exercise, no participant showed a statistically significant change in physical walking distance during the 6MWT.                                                                                                                                                                                                                                                                                                                                                                                                                                                                                                                                                                                                                                                                                                                                                                                                                                                                                                                                                                                                 | No adverse events have occurred. |
| Allaire, et al. <sup>2</sup> ; 2005; RCT; USA                                                               | SLE <sup>Ⓢ</sup><br>IG n=122 <sup>Ⓢ</sup><br>CG n=120 <sup>Ⓢ</sup><br><br>Mean age = 49.49 (±9.19) | Job retention intervention;<br>1) Time to the first job loss                                                                                                                 | 1) Two types of job loss events: permanent job loss, consisting of permanent disability or premature retirement; and temporary job loss, consisting of a period of unemployment.                                                                                                                     | n=122 <sup>Ⓢ</sup>                               | n=120 <sup>Ⓢ</sup><br><br>Same written materials                         | In this study, patients with different diseases were investigated. Since no subgroup analyses were presented in the article, the effectiveness findings refer to a mixed population, which makes a conclusion related to people with SLE only impossible.<br><br>Overall 73 permanent or temporary job loss events in the full sample over 48 months of follow-up: 25 IG and 48 CG; permanent job losses alone, 12 IG vs 22 CG; temporary job losses alone, 13 IG vs 26 CG. In the Poisson regression analysis, persons in the IG had a 49% (confidence interval 17–69%, p = .007) reduction in the total number of permanent and temporary job losses compared to CG.<br>Time to job loss: At 12 months post-intervention, a greater percentage of participants of IG remained employed compared to participants in the CG. The difference increased at 18 months, was sustained over 42 months, and was significant by the log-rank statistical test, p = .03. After 24 months, the numbers of job losses are more or less equal in the two groups; however, the cumulative job loss at 48 months is greatest in the control group. | Not reported in the article.     |
| Antonioli, et al. <sup>3</sup> ; 2009; quasi-experimental study; Italy                                      | SSc<br>IG n=16<br>CG n=17<br>CG n=1                                                                | individualized rehabilitation program; primary outcome was not specified,<br>1) Functioning<br>2) Quality of life<br>3) Impaired health and perceived QOL in airways disease | 1) Health Assessment Questionnaire Disability Index (HAQDI), Hand Mobility in scleroderma (HAMIS), Six Mminute walk test (6MWT)<br>2) Short Form 36 (SF-36 PCS, MCS) <sup>¶</sup><br>3) Saint George's Respiratory Questionnaire (SGRQ), Lung function tests<br>4) Rodnan Skin thickness Score (RSS) | n=16<br>Median age [IGR] = 66.5 [63.0–70.5]      | n=17<br>Median age [IGR] = 57 [50–67]<br><br>No intervention             | CG no significant differences over time.<br>IG improvements of the Short Form 36 (PCS, MCS), of respiratory disease, of hand mobility over time.<br>1) HAQDI (median [IQR]): T0 0.63 [0.34–0.75], T2 0.56 [0.34–0.88], T4 0.44 [0.25–0.75], p=ns, HAMIS (median [IQR]): right hand T0 3.0 [2.5–4.5], T2 3.0 [2–4], T4 2.0 [0.5–2.5], T0-T2 p=ns, T2-T4 p=0.005, T0-T4 p=0.002, left hand T0 3.0 [2.5–4], T2 3.0 [1–3.5], T4 1.0 [0–3], T0-T2 p=ns, T2-T4 p=0.008, T0-T4 p=0.003<br>2) SF-36 PCS (median [IQR]): T0 39.8 [33.9–42], T2 40.1 [35.6–43.5], T4 44.0 [41.5–48], T0-T2 p=ns, T2-T4 p=0.005, T0-T4 p=0.001, SF-36 MCS                                                                                                                                                                                                                                                                                                                                                                                                                                                                                                        | Not reported in the article.     |

| Study; Year; Design; Country                      | Population                                               | Intervention; Primary Outcome                                                                                                                     | Measurement                                                                    | n IG <sup>+</sup><br>Mean age<br>(±SD) <sup>o</sup>                             | n CG <sup>+</sup><br>Mean age<br>(±SD) <sup>o</sup><br>Control<br>intervention                                                                          | Results                                                                                                                                                                                                                                                                                                                                                                                                                                                                                                                                                                                                                                                                                                                                                                                                                                                                                                                                                                                                                                                                                                                                                                                                                                                                                                                                                                             | Adverse effects                                                                                     |
|---------------------------------------------------|----------------------------------------------------------|---------------------------------------------------------------------------------------------------------------------------------------------------|--------------------------------------------------------------------------------|---------------------------------------------------------------------------------|---------------------------------------------------------------------------------------------------------------------------------------------------------|-------------------------------------------------------------------------------------------------------------------------------------------------------------------------------------------------------------------------------------------------------------------------------------------------------------------------------------------------------------------------------------------------------------------------------------------------------------------------------------------------------------------------------------------------------------------------------------------------------------------------------------------------------------------------------------------------------------------------------------------------------------------------------------------------------------------------------------------------------------------------------------------------------------------------------------------------------------------------------------------------------------------------------------------------------------------------------------------------------------------------------------------------------------------------------------------------------------------------------------------------------------------------------------------------------------------------------------------------------------------------------------|-----------------------------------------------------------------------------------------------------|
|                                                   |                                                          | 4) Skin score                                                                                                                                     |                                                                                |                                                                                 |                                                                                                                                                         | (median [IQR]): T0 46.5 [42.2–49.2], T2 46.3 [40.5–50.6], T4 50.4 [46–54.3], T0-T2 p=ns, T2-T4 p=0.004, T0-T4 p=0.013<br>3) SGRQ (median [IQR]): T0 30.9 [17.3–36.9], T2 29.2 [16.2–37.1], T4 22.7 [12.5–31.3], T0-T2 p=ns, T2-T4 p=0.016, T0-T4 p=0.012<br>4) data not shown, not significant                                                                                                                                                                                                                                                                                                                                                                                                                                                                                                                                                                                                                                                                                                                                                                                                                                                                                                                                                                                                                                                                                      |                                                                                                     |
| Attia <sup>4</sup> , 2014, single case study, USA | SSc<br>☞ IC n=1                                          | Physiotherapy;<br>1) cervical dysfunction                                                                                                         | 1) Soft tissue mobility, posture, range of motion (ROM)                        | n=1<br>Age 71                                                                   | n.a.                                                                                                                                                    | The patient was able to increase cervical ROM in left rotation to match that of the ipsilateral side, strength improved in all tested cervical and upper extremity planes, and soft tissue mobility improved.<br>Soft tissue mobility: Scores are not reported<br>Posture: "some progress", 25% of goal met<br>ROM: 75% of goal met                                                                                                                                                                                                                                                                                                                                                                                                                                                                                                                                                                                                                                                                                                                                                                                                                                                                                                                                                                                                                                                 | Not reported in the article.                                                                        |
| Austin, et al. <sup>5</sup> ; 1996; RCT; USA      | SLE<br>☞ IG n=27<br>☞ IG n=1<br>☞ CG n=26<br>☞ CG n=1    | Telephone intervention strategies; primary outcome was not specified,<br>1) Health outcomes (fatigue, physical dysfunction, psychological affect) | 1) Fatigue Severity Scale (FSS), Arthritis Impact Measurement Scales 2 (AIMS2) | n=28<br>Mean age = 53.0<br>(±SD not reported)<br><br>treatment counselling (TC) | n=27<br>Mean age = 49.6 (±SD not reported)<br><br>symptom monitoring (SM);<br>The SM and TC protocol was expected to assist patients in primary outcome | 6-month follow-up, mean AIMS2 Physical Function scale significantly improved for the TC group compared to the SM groups. The mean FSS score, AIMS2 Affect score, and AIMS2 Pain score significantly improved for both groups.<br>FSS (mean [±SD]): IG baseline (4.57 [±0.47]); 6 month (3.95 [±1.17]); ES 0.55; CG baseline (4.57 [±0.37]); 6 month (4.22 [±0.79]); ES 0.44; IG and CG baseline (4.57 [±0.42]); 6 month (4.08 [±1.00]); ES 0.50; within group p=0.001; between group p=0.319<br>AIMS2 Physical scale (mean [±SD]): IG baseline (3.91 [±1.99]); 6 month (3.12 [±2.17]); ES 0.42; within group p=0.003; CG baseline (3.40 [±1.71]); 6 month (3.77 [±2.07]); ES -0.34; within group p=0.036; IG and CG baseline (3.66 [±1.86]); 6 month (3.44 [±2.13]); ES 0.14; within group p=0.091; between group p=0.014<br>AIMS2 Affect scale (mean [±SD]): IG baseline (4.27 [±2.12]); 6 month (3.56 [±1.97]); ES 0.47; CG baseline (4.32 [±1.74]); 6 month (3.56 [±1.59]); ES 0.62; IG and CG baseline (4.30 [±1.92]); 6 month (3.56 [±1.78]); ES 0.54; within group p=0.000; between group p=0.923<br>AIMS2 Pain scale (mean [±SD]): IG baseline (4.95 [±2.80]); 6 month (4.44 [±2.59]); ES 0.21; CG baseline (6.22 [±2.55]); 6 month (5.48 [±1.90]); ES 0.44; IG and CG baseline (5.57 [±2.73]); 6 month (4.95 [±2.32]); ES 0.30; within group p=0.029; between group p=0.507 | Physical function seemed to worsen in the SM group while it improved significantly in the TC group. |
| Avaux, et al. <sup>6</sup> ; 2016; RCT; Belgium   | SLE<br>☞ IG (HT) n=16<br>☞ IG (ST) n=15<br>☞ IG (HT) n=2 | Supervised training (ST) compared to home training (HT);<br>1) Fatigue                                                                            | 1) Fatigue severity scale (FSS)                                                | HT n=18<br>Mean age = 37 (±7)<br><br>ST n=15<br>Mean age = 43 (±7)              | n=9<br>Mean age = 46 (±11)<br><br>No intervention                                                                                                       | ST and HT, but not the CG, improved their FSS at month 3, compliance was similar and low (±50%) in both exercise groups. Moreover, less compliant patients improved their fatigue as much as more compliant patients. Detailed data are not shown in the article.                                                                                                                                                                                                                                                                                                                                                                                                                                                                                                                                                                                                                                                                                                                                                                                                                                                                                                                                                                                                                                                                                                                   | Not reported in the article.                                                                        |

| Study; Year; Design; Country                     | Population                                                                                                                                                                                                                                                                                                     | Intervention; Primary Outcome                                                                                                                                                                                                                                | Measurement                                                                                                                                                                                                                     | n IG <sup>±</sup><br>Mean age<br>(±SD) <sup>Ⓟ</sup> | n CG <sup>±</sup><br>Mean age<br>(±SD) <sup>Ⓟ</sup><br>Control<br>intervention                               | Results                                                                                                                                                                                                                                                                                                                                                                                                                                                                                                                                                                                                                                                                                                                                                                                                                                                                                                                                                                                                                                                                                                                                                                                                                                                                                                                                                                                                                                                                                                                                                                                                                   | Adverse effects                  |
|--------------------------------------------------|----------------------------------------------------------------------------------------------------------------------------------------------------------------------------------------------------------------------------------------------------------------------------------------------------------------|--------------------------------------------------------------------------------------------------------------------------------------------------------------------------------------------------------------------------------------------------------------|---------------------------------------------------------------------------------------------------------------------------------------------------------------------------------------------------------------------------------|-----------------------------------------------------|--------------------------------------------------------------------------------------------------------------|---------------------------------------------------------------------------------------------------------------------------------------------------------------------------------------------------------------------------------------------------------------------------------------------------------------------------------------------------------------------------------------------------------------------------------------------------------------------------------------------------------------------------------------------------------------------------------------------------------------------------------------------------------------------------------------------------------------------------------------------------------------------------------------------------------------------------------------------------------------------------------------------------------------------------------------------------------------------------------------------------------------------------------------------------------------------------------------------------------------------------------------------------------------------------------------------------------------------------------------------------------------------------------------------------------------------------------------------------------------------------------------------------------------------------------------------------------------------------------------------------------------------------------------------------------------------------------------------------------------------------|----------------------------------|
|                                                  |  IG (ST)<br>n=0<br> CG n=9<br> CG n=0                       |                                                                                                                                                                                                                                                              |                                                                                                                                                                                                                                 |                                                     |                                                                                                              |                                                                                                                                                                                                                                                                                                                                                                                                                                                                                                                                                                                                                                                                                                                                                                                                                                                                                                                                                                                                                                                                                                                                                                                                                                                                                                                                                                                                                                                                                                                                                                                                                           |                                  |
| Ball <sup>7</sup> ; 2010; single case study; UK  | SLE<br> IG n=2                                                                                                                                                                                                                | Fascial Release Therapy (FRT) and structural integration (SI); no primary outcome defined,<br>1) Reducing pain, stiffness, fatigue, anxiety.<br>2) Enhancing functional mobility, autonomy, quality of life, emotional state, autonomic and immune function. | 1) and 2) Pain, on a 0-10 reported scale (NRS), functional mobility/ROM, functional autonomy, episodes of exhaustion, emotional state, Quality of life, only case 1: use of pain medication, only case 2: GI tract malfunction. | n=2<br>Age: 55 and 22 years                         | n.a.                                                                                                         | <p><b>CASE 1:</b> pain decreased from 8.5 to 1.5; Use of pain medication was reduced from 9.2 to 1.9; Functional mobility/RoM rose from 2.0 to 8.1; RoM in specifically, unilaterally restricted joints, directions of movement, and/or body areas increased to at least 80-90% of the contralateral side, where RoM gains had likewise been achieved; Functional autonomy (daily, leisure, social activities) improved from 2.5 to 7.8; Episodes of exhaustion diminished from 9.3 to 3.5; Positive emotional state improved from 1.0 to 7.5; Quality of life recovered from 2.2 to 7.8.</p> <p><b>CASE 2:</b> pain decreased from 8.0 to 2.0; GI tract malfunction regressed from 7.5 to 3.8; Functional mobility/RoM rose from 2.8 to 7.5; R trunk side-bending improved by 20% and spinal 'elevation' by over 2 cm after Session 1; bilateral ankle plantar/dorsiflexion increased by an estimated 20%+, as did 'true' hallux extension; L hip extension and lateral rotation attained over 90% of RoM on the R; Functional autonomy improved from 4.5 to 8.0; Episodes of exhaustion diminished from 9.1 to 4.0; Positive emotional state improved from 2.8 to 8.0; Quality of life recovered from 3.9 to 7.5</p> <p>In addition, both had fascia-related improvements: Softness, pliability, extensibility, and mobility of the skin, subcutaneous, and superficial ('deep investing layer') fasciae; Softness and 'fluidity' of areolar fascia; Independent gliding between adjacent fasciae and structures; Muscle tone, resting length, softness, flexibility, proprioception, recruitment, and performance.</p> | Not reported in the article.     |
| Benatti, et al. <sup>8</sup> ; 2014; RCT; Brazil | SLE<br> IG n=16<br> CG n=17<br> healthy controls n=10 | Exercise training program;<br>1) Lipid profile, composition of high-density lipoprotein (HDL)<br>HDL2 and HDL3                                                                                                                                               | 1) Blood samples                                                                                                                                                                                                                | n=16<br><br>Mean age = 31.3 (±5.9)                  | n=17<br>Mean age = 29.7 (±5.3)<br>no intervention<br><br>healthy controls (same training program as IG) n=10 | IG: trend toward lower Apo B levels (p = 0.06, ES = -0.3, within-group comparison), no other significant changes in any of the variables<br>CG: no changes in any variables (p > 0.05, within-group comparisons)<br>Healthy controls: significantly (cholesterol p = 0.036, ES = 2.06; triglyceride p = 0.038, ES = 1.77; and HDL2p = 0.0021, ES = 2.37 within-group comparisons), Apo A-I not significance in the healthy control group (p = 0.17, ES = 1.10; within-group comparison between-group comparison), it was significantly higher than in the IG group (p = 0.02, ES = -1.5,)                                                                                                                                                                                                                                                                                                                                                                                                                                                                                                                                                                                                                                                                                                                                                                                                                                                                                                                                                                                                                                 | No adverse events have occurred. |

| Study; Year; Design; Country                                                            | Population                 | Intervention; Primary Outcome                                                                                                                    | Measurement                                               | n IG <sup>+</sup><br>Mean age<br>(±SD) <sup>o</sup>     | n CG <sup>+</sup><br>Mean age<br>(±SD) <sup>o</sup><br>Control<br>intervention | Results                                                                                                                                                                                                                                                                                                                                                                                                                                                                                                                                                                                                                                                                                                                                                                                                                                                                                                                                                                               | Adverse effects                  |
|-----------------------------------------------------------------------------------------|----------------------------|--------------------------------------------------------------------------------------------------------------------------------------------------|-----------------------------------------------------------|---------------------------------------------------------|--------------------------------------------------------------------------------|---------------------------------------------------------------------------------------------------------------------------------------------------------------------------------------------------------------------------------------------------------------------------------------------------------------------------------------------------------------------------------------------------------------------------------------------------------------------------------------------------------------------------------------------------------------------------------------------------------------------------------------------------------------------------------------------------------------------------------------------------------------------------------------------------------------------------------------------------------------------------------------------------------------------------------------------------------------------------------------|----------------------------------|
|                                                                                         |                            |                                                                                                                                                  |                                                           |                                                         | Mean age = 30.9 (±7.2)                                                         |                                                                                                                                                                                                                                                                                                                                                                                                                                                                                                                                                                                                                                                                                                                                                                                                                                                                                                                                                                                       |                                  |
| Berdal, et al. <sup>9</sup> ; 2018; RCT; Norway                                         | SLE<br>IG = 2<br>CG = 13   | Structured Goal Planning and Supportive Telephone Follow-up;<br>1) Health-related quality of life (HRQoL)                                        | 1) Patient Generated Index (range 0–100, where 0 = low)   | n=2<br>Mean age not reported for SLE patients           | n=13<br>Mean age not reported for SLE patients<br>Usual care                   | In this study, patients with different diseases were investigated. Since no subgroup analyses were presented in the article, the effectiveness findings refer to a mixed population, which makes a conclusion related to people with SLE only impossible.<br><br>Significant treatment effect of the add-on intervention on HRQoL was found on discharge (mean difference 3.32 [95% confidence interval 0.27, 6.37]; P = 0.03). No significant between-group differences were found after 6 or 12 months. Both groups showed positive changes in HRQoL following rehabilitation, which gradually declined, although the values remained at higher levels after 6 and 12 months compared with baseline values.<br>6 months: mean CG 48.4 (95% CI 45.9, 50.8); mean IG 50.3 (95% CI 47.8, 52.8); mean difference 1.91 (95% CI -1.19, 5.02), p=0.23<br>12 months: mean CG 49.3 (95% CI 46.8, 51.8); mean IG 48.8 (95% CI 46.2, 51.3); mean difference -0.58 (95% CI -3.75, 2.60), p=0.72 | Not reported in the article.     |
| Bogdanovic, et al. <sup>10</sup> ; 2015; RCT; Serbia                                    | SLE<br>IG n=30<br>CG n=30  | Different types of physical activity;<br>1) Quality of life                                                                                      | 1) Questionnaire on quality of life Short Form 36 (SF-36) | n=30<br>aerobic training<br><br>Mean age = 38.8 (±12.6) | n=30<br>isotonic exercises <sup>①</sup><br><br>Mean age = 47.9 (±11.5)         | In all domains of quality of life, the questionnaire SF36 high statistical difference before and after physical activity both types (p < 0.001); results of comparison of physical activity on the bicycle ergometer and isotonic no significant difference. Other data regarding Quality of Life not shown.                                                                                                                                                                                                                                                                                                                                                                                                                                                                                                                                                                                                                                                                          | Not reported in the article.     |
| Boström, et al. <sup>11</sup> ; 2016; RCT; Sweden                                       | SLE<br>IG n=18<br>CG n=17  | physical activity programme; 1) Aerobic capacity                                                                                                 | 1) Maximal oxygen uptake (VO2max)                         | n=18<br>Mean age = 52 (±10)                             | n=17<br>Mean age = 53 (±9)<br><br>Usual care                                   | VO2 max. increased between baseline and month 3 (p<0.0001), between months 3 and 6 (p=0.01) and the increase was sustained at month 12, but not significant.<br>1) VO2 max. (l/min; displayed in estimated means and standard errors) (base IG 1.34 ±0.07; CG 1.41 ±0.07; month 3 IG 1.56 ±0.07; CG 1.54 ±0.08; month 6 IG 1.62 ±0.07, CG 1.65 ±0.08, month 12 IG 1.62 ±0.07, CG 1.63 ±0.08, Time p<0.0001, group p=0.95)                                                                                                                                                                                                                                                                                                                                                                                                                                                                                                                                                             | No adverse events have occurred. |
| Braden, et al. <sup>12</sup> ; 1993; uncontrolled, longitudinal experimental study, USA | SLE<br>IG n=299<br>CG n=14 | Systemic Lupus Erythematosus Self-Help Course; primary outcome was not specified,<br>1) Psychosocial concerns, depression, enabling skill, rest, | 1) Self-developed questionnaire                           | n=313<br>Mean age = 45.8 (±13.5)                        | n.a.                                                                           | Depression and enabling skill had a significant mean change over time. Perception of limitation concerns was not significant.<br>Limitation (mean ±SD): Time_1 2.3 (±0.7), Time_2 2.2 (±0.6), Time_3 2.2 (±0.6)<br>Depression (mean ±SD): Time_1 176.1 (±98), Time_2 147 (±90.7), Time_3 2 154 (±96.7)<br>Enabling skills (mean ±SD): Time_1 397.8 (±125.7), Time_2 419.7 (±113.3), Time_3 432.8 (±111.4)                                                                                                                                                                                                                                                                                                                                                                                                                                                                                                                                                                             | Not reported in the article.     |

| Study; Year; Design; Country                                                                                    | Population                                      | Intervention; Primary Outcome                                                                                                                               | Measurement                                                                                                                                                                                                | n IG <sup>+</sup><br>Mean age<br>(±SD) <sup>o</sup>                        | n CG <sup>+</sup><br>Mean age<br>(±SD) <sup>o</sup><br>Control<br>intervention | Results                                                                                                                                                                                                                                                                                                                                                                                                                                                                                                                       | Adverse effects                  |
|-----------------------------------------------------------------------------------------------------------------|-------------------------------------------------|-------------------------------------------------------------------------------------------------------------------------------------------------------------|------------------------------------------------------------------------------------------------------------------------------------------------------------------------------------------------------------|----------------------------------------------------------------------------|--------------------------------------------------------------------------------|-------------------------------------------------------------------------------------------------------------------------------------------------------------------------------------------------------------------------------------------------------------------------------------------------------------------------------------------------------------------------------------------------------------------------------------------------------------------------------------------------------------------------------|----------------------------------|
|                                                                                                                 |                                                 | relaxation, heat and exercise activities                                                                                                                    |                                                                                                                                                                                                            |                                                                            |                                                                                |                                                                                                                                                                                                                                                                                                                                                                                                                                                                                                                               |                                  |
| Broadbent, et al. <sup>13</sup> ; 2014; single case study; Australia                                            | SSc<br>IG n=1                                   | Nintendo Wii Fit exercises; no primary outcomes defined<br>1) Functional capacity<br>2) Exercise tolerance<br>3) Strength<br>4) Balance                     | 1) -4) 6-minute walk test (6MWT). Timed Up and Go (TUG). 30-second sit to stand. Hand grip strength. Tinetti Balance and Gait Assessment (TBGA). Falls Efficacy Scale–International (FES-I) questionnaire. | n=1<br>Age = 77                                                            | n.a.                                                                           | Improvements in 6-minute walk test (6MWT) (100%); Timed Up and Go (TUG) (5.3%); 30-second sit to stand (25%); hand grip strength (right 21%; left 8.6%); ankle plantarflexion (right 16.7%; left 33.3%) and dorsiflexion (right 125%; left 88.9%), Tinetti Balance and Gait Assessment (balance score 35.5%; falls efficacy scale score 21.4%); resting systolic blood pressure (5.1%); and oxygen saturation (3.3%). The average movement of centre of pressure decreased post-intervention, but average velocity increased. | No adverse events occurred.      |
| Brown <sup>14</sup> ; 2010; expert-opinion; UK                                                                  | SSc                                             | Role of the nurse specialist in the management of digital ulcers;<br>1) Digital ulcers                                                                      | n.a.                                                                                                                                                                                                       | n.a.                                                                       | n.a.                                                                           | n.a.                                                                                                                                                                                                                                                                                                                                                                                                                                                                                                                          | n.a.                             |
| Brown, et al. <sup>15</sup> ; 2012; RCT; USA                                                                    | SLE<br>IG (CBT) n=27<br>IG (EO) n=10<br>CG n=16 | Cognitive behavioral therapy OR Education only; no primary outcome defined,<br>1) Manage pain<br>2) Disease adjustment and adaptation<br>3) Quality of life | 1) McGill Pain Questionnaire – Short Form (SF-MPQ)<br>2) Behavior Assessment System for Children (BASC).<br>3) PedsQL                                                                                      | n=27<br>CBT<br>Mean age = 15.4 (±3.0)<br>n=10<br>EO Mean age = 15.0 (±3.3) | n=16<br>Mean age = 15.9 (±2.0)<br><br>No intervention                          | Primary comparison was between the CBT group and the no-contact control group at the 7th week assessment. Results of the primary analysis of the GST that compared the CBT group and the no-contact control group at post-testing revealed that the CBT group did not exhibit significant overall improvement compared to the no-contact control group (T = -0.34, p = 0.63). CBT (n=27) vs. CG (n = 16), post-test t=-0.34; p=0.63                                                                                           | Not reported in the article.     |
| Carrera, et al. <sup>16</sup> ; Soriano-Maldonado, et al. <sup>17</sup> ; 2019; quasi-experimental study; Spain | SLE<br>IG n=26<br>CG n=32                       | 12-week aerobic exercise intervention;<br>1) Arterial stiffness                                                                                             | 1) Pulse wave velocity (PWV)                                                                                                                                                                               | n=26<br>Mean age = 43.0 (±15.1)                                            | n=32<br>Mean age = 44.8 (±13.1)<br>Usual care                                  | No between-group differences in the changes in arterial stiffness (median PWV difference -0.034, 95% CI -0.42 to 0.36 m/s; p = 0.860) at week 12.                                                                                                                                                                                                                                                                                                                                                                             | No adverse events have occurred. |
| Carrier, et al. <sup>18</sup> ; 2018; study protocol; Canada                                                    | SSc                                             | Scleroderma patient-centered intervention network hand exercise program (SPIN-HAND);<br>1) hand functioning                                                 | 1) 18-item Cochin Hand Function Scale (CHFS)                                                                                                                                                               | n.a.                                                                       | n.a.                                                                           | n.a.                                                                                                                                                                                                                                                                                                                                                                                                                                                                                                                          | n.a.                             |
| Carrier, et al. <sup>19</sup> ; 2020;                                                                           | SSc                                             | Scleroderma Patient-Centered                                                                                                                                | 1) Self-Efficacy for Managing Chronic Disease Scale score (SEMCD)                                                                                                                                          | n.a.                                                                       | n.a.                                                                           | n.a.                                                                                                                                                                                                                                                                                                                                                                                                                                                                                                                          | n.a.                             |

| Study; Year; Design; Country                                                            | Population                    | Intervention; Primary Outcome                                                                                                                                                                         | Measurement                                                                                                                                                                                                                              | n IG <sup>‡</sup><br>Mean age<br>(±SD) <sup>¶</sup> | n CG <sup>‡</sup><br>Mean age<br>(±SD) <sup>¶</sup><br>Control<br>intervention | Results                                                                                                                                                                                                                                                                                                                                                                                                                                                                                                                                                                                                                                                                                                                                                                                                                                                                                                                                                                                                                                                                                                                                                                                                                                                                                                                                                                                                                                                                                                                                                                                                                                                                                                                                                                                                                                        | Adverse effects              |
|-----------------------------------------------------------------------------------------|-------------------------------|-------------------------------------------------------------------------------------------------------------------------------------------------------------------------------------------------------|------------------------------------------------------------------------------------------------------------------------------------------------------------------------------------------------------------------------------------------|-----------------------------------------------------|--------------------------------------------------------------------------------|------------------------------------------------------------------------------------------------------------------------------------------------------------------------------------------------------------------------------------------------------------------------------------------------------------------------------------------------------------------------------------------------------------------------------------------------------------------------------------------------------------------------------------------------------------------------------------------------------------------------------------------------------------------------------------------------------------------------------------------------------------------------------------------------------------------------------------------------------------------------------------------------------------------------------------------------------------------------------------------------------------------------------------------------------------------------------------------------------------------------------------------------------------------------------------------------------------------------------------------------------------------------------------------------------------------------------------------------------------------------------------------------------------------------------------------------------------------------------------------------------------------------------------------------------------------------------------------------------------------------------------------------------------------------------------------------------------------------------------------------------------------------------------------------------------------------------------------------|------------------------------|
| study protocol; Canada                                                                  |                               | Intervention Network Self-Management Program (SPIN-SELF);<br>1) Self-efficacy                                                                                                                         |                                                                                                                                                                                                                                          |                                                     |                                                                                |                                                                                                                                                                                                                                                                                                                                                                                                                                                                                                                                                                                                                                                                                                                                                                                                                                                                                                                                                                                                                                                                                                                                                                                                                                                                                                                                                                                                                                                                                                                                                                                                                                                                                                                                                                                                                                                |                              |
| Carvalho, et al. <sup>20</sup> ; 2005; quasi-experimental study; Brazil                 | SLE<br>Ⓔ IC n=41<br>Ⓔ CG n=19 | supervised cardiovascular training; primary outcome was not specified,<br>1) Exercise tolerance<br>2) Aerobic capacity<br>3) Fatigue<br>4) Depression<br>5) Functional capacity<br>6) Quality of life | 1) Maximum exercise tolerance in minutes<br>2) VO2max in ml/kg/minute<br>3) Fatigue severity scale (FSS)<br>4) Beck Depression Inventory questionnaire (BDI)<br>5) The Health Assessment Questionnaire (HAQ)<br>6) Short Form 36 (SF-36) | n=41<br>Mean age = 36.22 (±10.79)                   | n=19<br>Mean age = 35.21 (±9.13)<br><br>No training.                           | IG significant improvement aerobic capacity measured by anaerobic threshold VO2 (14.67± 3.03 versus 17.08± 3.35 ml/kg/minute, P < 0.001). Comparison of the training group and control group after 12 weeks showed a significant difference relating to VO2max (24.31±4.61 versus 21.21±3.88 ml/kg/minute, P= 0.01) and anaerobic threshold VO2 (17.08±3.35 versus 13.66± 2.82 ml/kg/minute, P < 0.0001). After cardiovascular training, we found a significant improvement of Beck inventory score (8.37±12.79 versus 2.90±3.00, P < 0.001) and HAQ score (0.14±0.21 versus 0.06±0.19, P < 0.01) in the training group<br>1) Maximum exercise tolerance, mean (±SD): IG baseline 10.46 (±1.63), post-intervention 11.93 (±1.65), within p=0.001; CG baseline 10.91 (±1.64), post-intervention 11.11 (±1.51), within p=0.555<br>2) VO2max, mean (±SD): IG baseline 22.63 (±4.25), post-intervention 24.31 (±4.61), within p=0.02; CG baseline 22.40 (±4.69), post-intervention 21.21 (±3.88), within p=0.164<br>3) FSS, mean (±SD): IG baseline 3.57 (±1.47), post-intervention 2.68 (±1.33), within p=0.001; CG baseline 3.28 (±1.33), post-intervention 3.29 (±1.47), within p=0.97, between groups p=0.10<br>4) BDI, mean (±SD): IG baseline 8.37 (±12.79), post-intervention 2.90 (±3.00), within p=0.001; CG baseline 5.79 (±6.44), post-intervention 6.63 (±8.50), within p=0.89, between groups p=0.15<br>5) HAQ, mean (±SD): IG baseline 0.14 (±0.21), post-intervention 0.06 (±0.19), within p=0.01; CG baseline 0.23 (±0.27), post-intervention 0.38 (±1.14), within p=0.88, between groups p=0.03<br>6) SF-36 (general health status), mean (±SD): IG baseline 63.32 (±22.38), post-intervention 73.17 (±18.97), within p=0.001; CG baseline 63.47 (±22.76), post-intervention 62.37 (±26.08), within p=0.97, between groups p=0.14 | Not reported in the article. |
| Clarke-Jenssen, et al. <sup>21</sup> ; 2005; one-group pretest–post test design; Norway | SLE <sup>£</sup><br>Ⓔ IG n=6  | Aerobic exercise program; primary outcome was not specified.<br>1) Pain and fatigue<br>2) Disease activity<br>3) Aerobic capacity<br>4) Physical function                                             | 1) Short Form Health Survey (SF-36)<br>2) Systemic Lupus Erythematosus Disease Activity Index (SLEDAI)<br>3) Maximum oxygen uptake [VO2max]<br>4) Modified Health Assessment Questionnaire (MHAQ).                                       | n=6<br>Mean age = 47 <sup>£</sup>                   | n.a.                                                                           | No aggravation in disease activity.<br>Score differed significantly from baseline after exercise:<br>1) SF-36 physical function pre-post (p=0.03 <sup>¶</sup> ), follow-up (p=0.03 <sup>¶</sup> )<br>2) VO2 after exercise pre-post (p=0.05 <sup>¶</sup> ), follow-up (p=0.03 <sup>¶</sup> )<br>No changes in the SF-36 pain score (p=0.1) and MHAQ score (p=0.08) after exercise compared with baseline.                                                                                                                                                                                                                                                                                                                                                                                                                                                                                                                                                                                                                                                                                                                                                                                                                                                                                                                                                                                                                                                                                                                                                                                                                                                                                                                                                                                                                                      | Not reported in the article. |

| Study; Year; Design; Country                                                                             | Population                             | Intervention; Primary Outcome                                                                                                                                                                            | Measurement                                                                                                                                                                                                                                                                                                                          | n IG <sup>‡</sup><br>Mean age<br>(±SD) <sup>¶</sup> | n CG <sup>‡</sup><br>Mean age<br>(±SD) <sup>¶</sup><br>Control<br>intervention | Results                                                                                                                                                                                                                                                                                                                                                                                                                                                                                                                                                                                                                                                                                                                                                                                                    | Adverse effects              |
|----------------------------------------------------------------------------------------------------------|----------------------------------------|----------------------------------------------------------------------------------------------------------------------------------------------------------------------------------------------------------|--------------------------------------------------------------------------------------------------------------------------------------------------------------------------------------------------------------------------------------------------------------------------------------------------------------------------------------|-----------------------------------------------------|--------------------------------------------------------------------------------|------------------------------------------------------------------------------------------------------------------------------------------------------------------------------------------------------------------------------------------------------------------------------------------------------------------------------------------------------------------------------------------------------------------------------------------------------------------------------------------------------------------------------------------------------------------------------------------------------------------------------------------------------------------------------------------------------------------------------------------------------------------------------------------------------------|------------------------------|
| Cunningham, et al. <sup>22</sup> ; 2018; Cunningham, et al. <sup>23</sup> ; 2019; qualitative study; USA | cSLE<br>IG n=14                        | Treatment and Education Approach for Childhood-onset Lupus (TEACH); primary outcome not specified;<br>1) Disease activity,<br>2) Fatigue,<br>3) Depression,<br>4) Anxiety,<br>5) Pain                    | 1) Systemic Lupus Erythematosus Disease Activity Index (SLEDAI)<br>2) Patient reported outcomes measurement information system (PROMIS)<br>3) Children's Depression Inventory 2nd Edition (CDI2); Beck Depression Inventory-II (BDI-II)<br>4) Screen for Child Anxiety Related Disorders (SCARED)<br>5) Numerical Rating Scale (NRS) | n=14<br>Mean age = 16.21 (±2.1)                     | n.a.                                                                           | Statistically significant reduction in fatigue (Z = - 2.81, p=0.005) and depressive symptoms (Z = - 2.69, p=0.007). Not significant reductions in pain (Z = - 1.91, p=0.06) and anxiety (Z = - 1.95, p=0.05).                                                                                                                                                                                                                                                                                                                                                                                                                                                                                                                                                                                              | Not reported in the article. |
| Daltroy, et al. <sup>24</sup> ; 1995; RCT; USA                                                           | SLE<br>IG n=16 <sup>¶</sup><br>CG n=18 | Exercise prescription and unsupervised home exercise programme; primary outcome was not specified,<br>1) Exercise tolerance<br>2) Fatigue<br>3) Depression<br>4) Helplessness                            | 1) Graded exercise test (ETT)<br>2) MAC Fatigue Scale, POMS Fatigue Scale<br>3) National Institute of Health CES-D Depression Scale<br>4) Arthritis Helplessness Index                                                                                                                                                               | n=16                                                | n=18<br><br>No intervention.                                                   | Analysis included RA also – no differentiation only for SLE possible (data pooled). Exercise group did better than controls on all outcomes— exercise tolerance, fatigue, depression and helplessness. However, none of the differences achieved statistical significance at the p=0.01 level, and a multivariate test for overall intervention effect was not significant (p= 0.34).<br>ETT (min) (mean, SD not reported): IG 9.6, CG 9.2, p=0.33<br>MAC (mean, SD not reported): IG 16.5, CG 18.9, p=0.10<br>POMS (mean, SD not reported): IG 7.6, CG 10.3, p=0.03<br>CES-D (mean, SD not reported): IG 11.3, CG 15.0, p=0.07<br>Helplessness Index (mean, SD not reported): IG 30.0, CG 31.9, p=0.11                                                                                                    | Not reported in the article. |
| Dobkin, et al. <sup>25</sup> ; 2002; RCT; Canada                                                         | SLE<br>IG n=64<br>CG n=69              | Brief Supportive-Expressive Group Psychotherapy; primary outcome was not specified, reducing<br>1) Psychological distress<br>2) Medical symptoms<br>3) Health care costs<br>4) Improving quality of life | 1) Symptom Checklist 90–Revised (SCL–90–R)<br>2) Systemic Lupus Activity Measure–Revised (SLAM–R)<br>3) Stanford Health Assessment Questionnaire (HAQ)<br>4) Short Form–36 (SF–36)                                                                                                                                                   | n=64<br>Mean age = 42.0 (±11.2)                     | n=69<br>Mean age = 43.0 (±10.4)<br>Usual care                                  | Intention-to-treat analyses revealed that there were no clinically important group differences on any of the outcome measures.<br>1) (Time 3 – Time 1) the coefficient for group was 0.01, with 95% CI = 0.13, 0.11, high distress was predicted by more distress at initial assessment, as well as increases in emotion oriented coping and stress but not by treatment group.<br>2) Within-subject changes indicated that 50.8% improved, 40.32% got worse, and 8.8% did not change over the 15-month period (–0.38, 95% CI 1.78-1.03).<br>3) No clinically meaningful between-group differences.<br>4) The group variable did not predict either health status dimension, indicating that the psychosocial intervention did not influence physical or mental health status at 12 months post treatment. | Not reported in the article. |
| Doerfler, et al. <sup>26</sup> ; 2017; one-group pretest–posttest design; USA                            | SSc<br>IG n=16<br>CG n=2               | Medical nutrition therapy (MNT) intervention; primary outcome was not specified (associated Effects).                                                                                                    | 1) Weight, height, and waist circumference (WC); dual-energy x-ray absorptiometry (DXA); Appendicular lean height (ALH)<br>2) 3-question (3Q) assessment tool<br>3) UCLA Scleroderma Clinical Trial Consortium Gastrointestinal Tracker 2.0                                                                                          | n=18<br>Mean age = 51 (±11)                         | n.a.                                                                           | 1) Significant decreases nutrition symptom scores (pre [12.8]; post [7.6]; p < .05); improvements in ALH (pre [5.6 ± 0.8]; post [5.8 ± 0.8]; p = 0.05); Sarcopenia (pre [n=7, 54%]; post [5, 39%]; p = 0.02); n.s. <sup>‡</sup> weight (pre [53.5 ± 9.2]; post [53.6 ± 9.0]; p=0.35), waist circumference (pre [76.2 ± 9.9]; post [75.2 ± 9.8]; p=0.84)<br>2) Physical activity (pre [2.4 ± 2.1]; post [2.5 ± 2.6]; p=0.56)                                                                                                                                                                                                                                                                                                                                                                                | Not reported in the article. |

| Study; Year; Design; Country                                                  | Population                | Intervention; Primary Outcome                                                                                                                      | Measurement                                                                                                                                                                                                                                                                                                                    | n IG <sup>‡</sup><br>Mean age<br>(±SD) <sup>¶</sup>                      | n CG <sup>‡</sup><br>Mean age<br>(±SD) <sup>¶</sup><br>Control<br>intervention | Results                                                                                                                                                                                                                                                                                                                                                                                                                                                                                                                                                                                                                                                                                                                                                                                                                                                                                  | Adverse effects              |
|-------------------------------------------------------------------------------|---------------------------|----------------------------------------------------------------------------------------------------------------------------------------------------|--------------------------------------------------------------------------------------------------------------------------------------------------------------------------------------------------------------------------------------------------------------------------------------------------------------------------------|--------------------------------------------------------------------------|--------------------------------------------------------------------------------|------------------------------------------------------------------------------------------------------------------------------------------------------------------------------------------------------------------------------------------------------------------------------------------------------------------------------------------------------------------------------------------------------------------------------------------------------------------------------------------------------------------------------------------------------------------------------------------------------------------------------------------------------------------------------------------------------------------------------------------------------------------------------------------------------------------------------------------------------------------------------------------|------------------------------|
|                                                                               |                           | 1) Body composition<br>2) Physical activity,<br>3) GI symptoms<br>4) Health related quality of life                                                | 4) The Centres for Disease Control and Prevention (CDC) Health-Related QOL 4 (HRQOL-4)                                                                                                                                                                                                                                         |                                                                          |                                                                                | 3) UCLA SCGI score (pre [0.87 ± 0.44]; post [0.66 ± 0.49]; p=0.20)<br>4) Health related quality of life (pre [7.7 ± 6.6]; post [6.6 ± 6.5]; p=0.34)                                                                                                                                                                                                                                                                                                                                                                                                                                                                                                                                                                                                                                                                                                                                      |                              |
| Drenkard, et al. <sup>27</sup> ; 2020; survey; USA                            | SLE<br>IG n=168           | Chronic Disease Self-Management Program (CDSMP); primary outcome not specified;<br>1) Quality of life<br>2) Self-Management<br>3) Disease severity | 1) PROMIS (Patient-Reported Outcome Measurement Information System Short Form)<br>2) PROMIS (Patient-Reported Outcome Measurement Information System Short Form); PAM (Patient Activation Measure); Stanford Scale<br>3) SA-BILD (Self-Administered Brief Index of Lupus Damage); SLAQ (Systemic Lupus Activity Questionnaire) | n=168<br>Mean age = 47.3<br>(±14.0)                                      | n.a.                                                                           | Not applicable. Study focussed barriers to recruitment and retention to this program.                                                                                                                                                                                                                                                                                                                                                                                                                                                                                                                                                                                                                                                                                                                                                                                                    | Not reported in the article. |
| Drenkard, et al. <sup>28</sup> ; 2012; one-group pretest–posttest design; USA | SLE<br>IG n=49            | Chronic Disease Self-Management Program (CDSMP); primary outcome was not specified,<br>1) Health status<br>2) Self-efficacy<br>3) Self-management  | 1) SF-36 v2 Health Survey (MCS, PCS) <sup>¶</sup> , Centre for Epidemiologic Studies Depression Scale (CES-D)<br>2) Self-efficacy for Managing Chronic Disease Scale<br>3) Cognitive Symptom Management Scale, Exercise Behaviors Scale, Communication with Physicians Scale, Self-reported Medication-taking Scale            | n=49<br>Mean age = 43.8 <sup>¶</sup> ; Median age (IQR) 44.7 (34.9–52.3) | n.a.                                                                           | Significant improvements in the SF-36 physical; self-efficacy, cognitive symptoms management, communication with physicians and treatment adherence.<br>1) PCS (mean ±SD: pre [32.2 ±8.6]; post [34.6 ±9.6], p=0.032), MCS (mean ±SD: pre [42.7 ±14.0]; post [45.3 ±14.1], p=0.10), CES-D (mean ±SD: pre [21.0 ±15.0]; post [19.8 ±13.7], p=0.44)<br>2) Self-efficacy managing chronic disease (mean ±SD: pre [5.5 ±2.5]; post [6.0 ±2.3], p=0.035)<br>3) Cognitive symptom management (mean ±SD: pre [2.3 ±1.0]; post [2.6 ±0.9], p=0.036), Stretching/strengthening exercised (mean ±SD: pre [47.0 ±70.0]; post [45.4 ±60.3], p=0.88), Aerobic exercised (mean ±SD: pre [84.5 ±116.5]; post [79.1 ±81.3], p=0.72), Communication with physicians (mean ±SD: pre [2.8 ±1.1]; post [3.2 ±1.3], p=0.011), Medication-Taking Measures (mean ±SD: pre [2.2 ±1.4]; post [2.6 ±1.3], p=0.012) | Not reported in the article. |
| Edworthy, et al. <sup>29</sup> ; 2003; RCT; Canada                            | SLE<br>IG n=58<br>CG n=66 | Brief supportive-expressive group psychotherapy;<br>1) Reduce illness-induced interference with valued activities and interests                    | 1) Illness Intrusiveness Ratings Scale (IIRS): 3 life domains:<br>(1) Relationships and personal development (family relationships, other social relationships, self-expression),<br>(2) Intimacy (relationship with spouse, sex life), and/or<br>(3) Instrumental life (work, finances, active recreation).                   | n=58<br>Mean age = 42.0<br>(±11.2)                                       | n=66<br>Mean age = 43.0 (±10.4)<br>usual care                                  | IIRS was measured pre-treatment, post treatment, 6 month follow-up, and 12 month follow-up.<br><br>Significant reductions in illness intrusiveness for 2 of 3 domains:<br>(1) relationships and personal development and<br>(2) Intimacy. Benefits were evident at 6 and 12 month follow-ups; supportive-expressive group psychotherapy greater reductions in illness intrusiveness, overall (F = 5.282; p = 0.012), and this was accounted for primarily by the IIRS Intimacy (F = 5.057; p = 0.013) and Relationships and Personal Development subscales (F = 2.34; p = 0.065). Instrumental activities related to health,                                                                                                                                                                                                                                                             | Not reported in the article. |



| Study; Year; Design; Country                                                     | Population                                                                                                   | Intervention; Primary Outcome                                                                                                                               | Measurement                                                                                                               | n IG <sup>‡</sup><br>Mean age<br>(±SD) <sup>¶</sup> | n CG <sup>‡</sup><br>Mean age<br>(±SD) <sup>¶</sup><br>Control<br>intervention | Results                                                                                                                                                                                                                                                                                                                                                                                                                                                                                                                                                                                                                                                                                                                                                                                                                                                                                                                                                                                                                                                                                                                                                                                                                                                                                                                                                                                                                                                                                                                                                                                                                                                                                                                                                                                                                                                                                                                          | Adverse effects                                     |
|----------------------------------------------------------------------------------|--------------------------------------------------------------------------------------------------------------|-------------------------------------------------------------------------------------------------------------------------------------------------------------|---------------------------------------------------------------------------------------------------------------------------|-----------------------------------------------------|--------------------------------------------------------------------------------|----------------------------------------------------------------------------------------------------------------------------------------------------------------------------------------------------------------------------------------------------------------------------------------------------------------------------------------------------------------------------------------------------------------------------------------------------------------------------------------------------------------------------------------------------------------------------------------------------------------------------------------------------------------------------------------------------------------------------------------------------------------------------------------------------------------------------------------------------------------------------------------------------------------------------------------------------------------------------------------------------------------------------------------------------------------------------------------------------------------------------------------------------------------------------------------------------------------------------------------------------------------------------------------------------------------------------------------------------------------------------------------------------------------------------------------------------------------------------------------------------------------------------------------------------------------------------------------------------------------------------------------------------------------------------------------------------------------------------------------------------------------------------------------------------------------------------------------------------------------------------------------------------------------------------------|-----------------------------------------------------|
|                                                                                  |                                                                                                              |                                                                                                                                                             |                                                                                                                           |                                                     |                                                                                | work, and finances were not significantly affected by the intervention. No more details reported.                                                                                                                                                                                                                                                                                                                                                                                                                                                                                                                                                                                                                                                                                                                                                                                                                                                                                                                                                                                                                                                                                                                                                                                                                                                                                                                                                                                                                                                                                                                                                                                                                                                                                                                                                                                                                                |                                                     |
| Everett, et al.<br><sup>30</sup> ; 2015;<br>quasi-<br>experimental<br>study; USA | SLE<br>IG n=41<br>IG n=30 <sup>‡</sup><br><br>□ n=63<br>□ n=8<br>Mean age <sup>¶</sup> =<br>39.7<br>(±12.82) | patient-centered<br>nutrition counselling;<br>no primary outcome<br>defined,<br>1) Select nutrient<br>2) Anthropometric<br>outcomes<br>3) Clinical outcomes | six-month changes in<br>1) Nutrient intake<br>2) Weight, body mass index (BMI), waist<br>circumference<br>3) Lipid levels | n=41                                                | n=30<br><br>Non attenders                                                      | (1) IG reduced their intake of sodium (p=0.006), total calories (p=0.07), and percent calories from fat (p=0.011) and saturated fat (p=0.068), were more likely to report increases in eating a diet rich in fruits and vegetables (p<0.001), a high fiber diet (p=0.011), equal or more than two servings of fish/week (p=0.002), and a low cholesterol diet (p=0.034)<br>(2) Had decreased weight (-1.64 kg, p=0.025), no changes in BMI and clinical outcomes<br><br>Between groups: at six months IG followed a high-fiber diet (p=0.03), consumed two or more servings of fish per week (p=0.01), followed a low-cholesterol diet (p=0.03), and achieved a greater weight loss (p=0.04)<br><br>Calories (kcal), mean (SD): baseline 1687.64 (±515.59); six-month 1522.91 (±440.78); difference 164.73 (±568.71); p=0.071<br>%Calories from fat: baseline 32.93 (±8.71); six-month 28.18 (±8.24); difference 4.13 (±9.88); p=0.011<br>%Calories from saturated fat: baseline 10.37 (±4.19); six-month 9.22 (±3.32); difference 1.15 (±3.91); p=0.068<br>Cholesterol (grams), mean (SD): baseline 277.71 (±204.23); six-month 231.38 (±149.74); difference 46.34 (±225.32); p=0.195<br>Sodium (grams), mean (SD): baseline 2518.28 (±883.53); six-month 2009.94 (±977.74); difference 508.34 (±1359.82); p=0.006<br>Omega-6 fatty acids (grams), mean (SD): baseline 9.02 (±4.97); six-month 8.53 (±8.24); difference 0.49 (±6.78); p=0.647<br>Omega-3 fatty acids (grams), mean (SD): baseline 0.33 (±0.66); six-month 0.29 (±0.43); difference 0.04 (±0.81); p=0.739<br>Fiber (grams), mean (SD): baseline 18.04 (±8.62); six-month 18.38 (±9.33); difference 0.34 (±9.33); p=0.823<br>Sugar (grams), mean (SD): baseline 82.52 (±53.17); six-month 76.72 (±38.93); difference 5.80 (±51.93); p=0.479<br>Folate (mg), mean (SD): baseline 365.16 (±193.66); six-month 334.89 (±211.13); difference 30.27 (±261.11); p=0.462 | Not reported in the article.                        |
| Filippetti, et al.<br><sup>31</sup> ; 2020;<br>RCT; Italy                        | SSc <sup>‡</sup><br>IG n=22<br>CG n=22                                                                       | Home-based<br>minimally supervised<br>exercise program;                                                                                                     | 1) 6 minutes walking test (6MWD)                                                                                          | n=22<br>Mean age = 63.6<br>(±10.4)                  | n=22<br>Mean age =<br>61.8 (±14.4)                                             | At 6 months, the distance walked in 6 minutes increased by 46m (baseline 486, 95% CI 458-513m; 6 months 532, 95% CI 504-561m) in IG, whereas it decreased by 5m (baseline 464, 95% CI 431-497m; 6                                                                                                                                                                                                                                                                                                                                                                                                                                                                                                                                                                                                                                                                                                                                                                                                                                                                                                                                                                                                                                                                                                                                                                                                                                                                                                                                                                                                                                                                                                                                                                                                                                                                                                                                | Patients were asked about their side effects to the |

| Study; Year; Design; Country                    | Population                                                                                     | Intervention; Primary Outcome                                                                                                                                                     | Measurement                                                                                                                                                                                                                                                                                                                                                                                                                                                                                                | n IG <sup>+</sup><br>Mean age<br>(±SD) <sup>o</sup> | n CG <sup>+</sup><br>Mean age<br>(±SD) <sup>o</sup><br>Control<br>intervention                                                            | Results                                                                                                                                                                                                                                                                                                                                                                                                                                                                                                                                                                                                                                                                                                                                                                                                                                                                                                                                                                                                                                                                                                                                                                                                                                                                                                                                                                                                                                                                                                                                                                                                                            | Adverse effects                            |
|-------------------------------------------------|------------------------------------------------------------------------------------------------|-----------------------------------------------------------------------------------------------------------------------------------------------------------------------------------|------------------------------------------------------------------------------------------------------------------------------------------------------------------------------------------------------------------------------------------------------------------------------------------------------------------------------------------------------------------------------------------------------------------------------------------------------------------------------------------------------------|-----------------------------------------------------|-------------------------------------------------------------------------------------------------------------------------------------------|------------------------------------------------------------------------------------------------------------------------------------------------------------------------------------------------------------------------------------------------------------------------------------------------------------------------------------------------------------------------------------------------------------------------------------------------------------------------------------------------------------------------------------------------------------------------------------------------------------------------------------------------------------------------------------------------------------------------------------------------------------------------------------------------------------------------------------------------------------------------------------------------------------------------------------------------------------------------------------------------------------------------------------------------------------------------------------------------------------------------------------------------------------------------------------------------------------------------------------------------------------------------------------------------------------------------------------------------------------------------------------------------------------------------------------------------------------------------------------------------------------------------------------------------------------------------------------------------------------------------------------|--------------------------------------------|
|                                                 |                                                                                                | primary outcome not specified;<br>1) Functional capacity                                                                                                                          |                                                                                                                                                                                                                                                                                                                                                                                                                                                                                                            |                                                     | Usual care                                                                                                                                | months 459, 95% CI 427-490m) in CG; significantly different between-groups comparison (P < .001).<br>6MWD (m) IG baseline 486 (CI95% 458;513); 3 months 518 (CI95% 492;544); 6 months 532 (CI95% 504;561);CG: baseline 464 (CI95% 431;497); 3 months 461 (CI95% 432;489); 6 months 459 (CI95% 427;490); between groups p<.0001                                                                                                                                                                                                                                                                                                                                                                                                                                                                                                                                                                                                                                                                                                                                                                                                                                                                                                                                                                                                                                                                                                                                                                                                                                                                                                     | exercise program.<br>More is not reported. |
| Freedman, et al. <sup>32</sup> ; 1984; RCT; USA | SSc<br>IG n=22<br>CG n=2                                                                       | 1) Autogenic training;<br>2) Finger temperature biofeedback, 3) frontalis EMG biofeedback;<br>1) Microcirculation                                                                 | 1) Finger-temperature: Distal end of the middle finger of the dominant hand using a Yellow Springs No. 729 thermistor and a Thermivolt bridge circuit.                                                                                                                                                                                                                                                                                                                                                     | Groups are not reported. Age not reported.          | Groups are not reported. Age not reported.                                                                                                | Finger temperatures from the post-training voluntary control session showed significant effects for Minutes [F (15,315) = 3.15, P< 0.0001] and Groups x Minutes [F(30,315) = 1.65, P< 0.05]. The temperature feedback group again showed a significant (P < 0.05) increase in finger temperature between min 17 and min 32, while the other two groups did not. More detailed data are not presented.                                                                                                                                                                                                                                                                                                                                                                                                                                                                                                                                                                                                                                                                                                                                                                                                                                                                                                                                                                                                                                                                                                                                                                                                                              | Not reported in the article.               |
| Greco <sup>33</sup> , 2015; study protocol, USA | SLE                                                                                            | Mind-Body Skills Training<br>1) Mental health                                                                                                                                     | 1) Centre for Epidemiologic Studies Depression scale (CES-D)                                                                                                                                                                                                                                                                                                                                                                                                                                               | n.a                                                 | n.a                                                                                                                                       | n.a                                                                                                                                                                                                                                                                                                                                                                                                                                                                                                                                                                                                                                                                                                                                                                                                                                                                                                                                                                                                                                                                                                                                                                                                                                                                                                                                                                                                                                                                                                                                                                                                                                | n.a                                        |
| Greco, et al. <sup>34</sup> ; 2004; RCT; USA    | SLE<br>IG<br>BF/CBT n=30<br>IG<br>BF/CBT n=2<br>IG SMS n=32<br>IG SMS n=1<br>CG n=25<br>CG n=2 | Stress-reduction program: BF /CBT (biofeedback/cognitive behavioural therapy); primary outcome was not specified,<br>1) Pain<br>2) Psychological function<br>3) Physical function | 1) The Revised Arthritis Impact Measurement Scales, pain subscale (AIMS2-Pain), The pain interference scale of the Multidimensional Pain Inventory (MPI-I)<br>2) The Center for Epidemiological Studies Depression scale (CES-D), Arthritis Self-Efficacy Scales, pain and other symptoms Subscale (ASES), Cohen's Perceived Stress Scale (STRESS)<br>3) Short Form 36 Health Survey (SF-36), the physical function scale of the SF-36 (SF-36-PF), the Fatigue Severity Scale (FSS), VAS (patients global) | BF/CBT n=32<br>Mean age = 48.2 (±9.1)               | SMS n=33<br>Mean age = 46.7 (±11.7)<br><br>symptom-monitoring support<br><br>UC n=27<br>Mean age = 47.0 (±10.5)<br><br>usual medical care | BF/CBT significant reductions in pain and psychological dysfunction compared with SMS (pain, p=0.044; psychological functioning, p<0.001) and UC (pain, P=0.028; psychological functioning, p<0.001).<br>BF/CBT significant improvement physical function compared UC (p=0.035), at 9-month (FU) follow up BF/CBT benefit compared with UC psychological functioning (p=0.023).<br>1) AIMS2-Pain (ES <sup>o</sup> ) (BF/CBT pre-post 0.74, pre-FU 0.63; SMS pre-post 0.37, pre-FU 0.47; UC pre-post 0.36, pre-FU 0.27); MPI-I (ES) (BF/CBT pre-post 0.72, pre-FU 0.59; SMS pre-post 0.25, pre-FU 0.35; UC pre-post 0.19, pre-FU 0.19); pre-post BF/CBT > UC p=0.028; pre-post BF/CBT > SMS p=0.044; pre-FU BF/CBT > UC p=0.305; pre-FU BF/CBT > SMS p=0.718<br>2) CES-D (ES) (BF/CBT pre-post 0.50, pre-FU 0.48; SMS pre-post 0.11, pre-FU 0.32; UC pre-post -0.10, pre-FU 0.18); ASES (ES <sup>o</sup> ) (BF/CBT pre-post 1.05, pre-FU 0.68; SMS pre-post 0.03, pre-FU 0.10; UC pre-post -0.17, pre-FU -0.08); STRESS (ES <sup>o</sup> ) (BF/CBT pre-post 0.49, pre-FU 0.41; SMS pre-post -0.06, pre-FU 0.32; UC pre-post -0.18, pre-FU -0.07); pre-post BF/CBT > UC p<0.001; pre-post BF/CBT > SMS p=0.001; pre-FU BF/CBT > UC p=0.023; pre-FU BF/CBT > SMS p=0.215<br>3) SF-36-PF (ES) (BF/CBT pre-post 0.42, pre-FU 0.33; SMS pre-post 0.03, pre-FU 0.07; UC pre-post 0.11, pre-FU -0.05); FSS (ES) (BF/CBT pre-post 0.36, pre-FU 0.15; SMS pre-post 0.28, pre-FU 0.31; UC pre-post 0.09, pre-FU 0.13); VAS (ES) (BF/CBT pre-post 0.61, pre-FU 0.60; SMS pre-post 0.07, pre-FU 0.24; UC pre-post -0.23, pre-FU 0.14); pre-post | Not reported in the article.               |

| Study; Year; Design; Country                                                  | Population                                    | Intervention; Primary Outcome                                                                                                          | Measurement                                                                                                                                                                                                           | n IG <sup>+</sup><br>Mean age<br>(±SD) <sup>o</sup> | n CG <sup>+</sup><br>Mean age<br>(±SD) <sup>o</sup><br>Control<br>intervention        | Results                                                                                                                                                                                                                                                                                                                                                                                                                                                                                                                                                                                                                                                                                                                                                                                                                                                                                                                                                          | Adverse effects              |
|-------------------------------------------------------------------------------|-----------------------------------------------|----------------------------------------------------------------------------------------------------------------------------------------|-----------------------------------------------------------------------------------------------------------------------------------------------------------------------------------------------------------------------|-----------------------------------------------------|---------------------------------------------------------------------------------------|------------------------------------------------------------------------------------------------------------------------------------------------------------------------------------------------------------------------------------------------------------------------------------------------------------------------------------------------------------------------------------------------------------------------------------------------------------------------------------------------------------------------------------------------------------------------------------------------------------------------------------------------------------------------------------------------------------------------------------------------------------------------------------------------------------------------------------------------------------------------------------------------------------------------------------------------------------------|------------------------------|
|                                                                               |                                               |                                                                                                                                        |                                                                                                                                                                                                                       |                                                     |                                                                                       | BF/CBT > UC p=0.035; pre-post BF/CBT > SMS p=0.097; pre-FU BF/CBT > UC p=0.125; pre-FU BF/CBT > SMS p=0.227                                                                                                                                                                                                                                                                                                                                                                                                                                                                                                                                                                                                                                                                                                                                                                                                                                                      |                              |
| Gregory, et al. <sup>35</sup> ; 2019; RCT; UK                                 | SSc<br>IG n=12<br>IG n=7<br>CG n=13<br>CG n=4 | Daily hand exercises with daily home wax bath hand treatment;<br>1) Function (hand)                                                    | 1) Hand Mobility in Scleroderma test (HAMIS)                                                                                                                                                                          | n=19<br>Median age = 64.4 (IQR 53.3 to 67.3)        | n=17<br>Median age = 66.4 (IQR 56.3 to 71.7)<br>Daily hand exercises without wax bath | Between group comparisons showed no significant difference; experimental-control -1.47 (-3.55 to 0.61), P=0.16) or at 18-week follow up experimental-control 1.94 (-1.07 to 4.95), P=0.20).                                                                                                                                                                                                                                                                                                                                                                                                                                                                                                                                                                                                                                                                                                                                                                      | Not reported                 |
| Harrison, et al. <sup>36</sup> ; 2005; one-group pretest–posttest design; USA | SLE<br>IG n=17                                | MINDFUL (Mastering the Intellectual Navigation of Daily Functioning and Undoing the Limitations of Lupus);<br>1) Cognitive dysfunction | 1) The Metamemory in Adulthood Questionnaire (MIA). The Memory Functioning Questionnaire (MFQ)                                                                                                                        | n=17<br>Mean age = 46.07 (±10.0)                    | n.a.                                                                                  | Changes in MIA scores were recorded for overall metamemory (p< 0.001), capacity (p = 0.004), change in memory (p< 0.001), strategy (p=0.047), and locus of control (p= 0.004) immediately after MINDFULL. Changes in memory functioning were also recorded for the kinds of memory problems (p=0.003), mnemonic usage (p=0.032), and retrospective functioning (p=0.020). No changes were noted in frequency or seriousness of forgetting.<br>MIA, mean (SD): Total score pre 3.42 (0.14), post 3.65 (0.20), p=0.00003<br>MFQ, mean (SD): Kinds of memory problems pre 2.88 (0.96), post 3.94 (0.85), p=0.003<br>MFQ, mean (SD): Frequency of forgetting pre 4.16 (0.58), post 4.47 (0.81), p=0.123<br>MFQ, mean (SD): Seriousness of forgetting pre 2.98 (0.68), post 3.10 (0.85), p=0.649<br>MFQ, mean (SD): Mnemonic usage pre 2.30 (0.88), post 1.84 (0.59), p=0.032<br>MFQ, mean (SD): Retrospective functioning pre 2.29 (0.97), post 3.08 (1.29), p=0.020 | Not reported in the article. |
| Haupt, et al. <sup>37</sup> ; 2005; quasi-experimental study; Germany         | SLE<br>IG n=24<br>IG n=2<br>CG n=7<br>CG n=1  | Psychological intervention;<br>1) Improving coping                                                                                     | 1) Freiburg questionnaire on coping with illness (FKV), self-acceptance registration scale (SESA), the hospital anxiety and depression scale–German version (HADS-D), symptom checklist 90 revised version (SCL-90-R) | n=26<br>Mean age = 40.15 (±12.96)                   | n=8<br>Mean age = 47.63 (±11.19)<br><br>No intervention                               | 34 SLE patients (91% female, mean age 42 years) improved significantly over a 6 month period on most of the psychological measuring instruments (within group)<br>SCL-90-R (mean (SD), only Global values presented here): Overall mental burden (GSI) baseline 59.74 (7.45); 3 month 56.15 (6.77, p<0.01), 6 month 55.59 (7.44, p<0.001), 12 month 55.41 (9.54, p<0.01)<br>HADS-D Anxiety, mean (SD): baseline 7.18 (3.72); 3 month 6.09 (3.05, p=ns), 6 month 5.53 (3.47, p<0.01), 12 month 5.71 (4.06, p<0.05)<br>HADS-D Depression, mean (SD): baseline 7.26 (4.60); 3 month 5.97 (3.95, p<0.01), 6 month 5.38 (3.67, p<0.01), 12 month 5.41 (3.99, p<0.01)                                                                                                                                                                                                                                                                                                  | Not reported in the article. |

| Study; Year; Design; Country                                         | Population                | Intervention; Primary Outcome                                                                                                                                                   | Measurement                                                                                 | n IG <sup>+</sup><br>Mean age<br>(±SD) <sup>o</sup>         | n CG <sup>+</sup><br>Mean age<br>(±SD) <sup>o</sup><br>Control<br>intervention | Results                                                                                                                                                                                                                                                                                                                                                                                                                                                                                                                                                                                                                                                                                                                                                                                                                                                                                                                          | Adverse effects                  |
|----------------------------------------------------------------------|---------------------------|---------------------------------------------------------------------------------------------------------------------------------------------------------------------------------|---------------------------------------------------------------------------------------------|-------------------------------------------------------------|--------------------------------------------------------------------------------|----------------------------------------------------------------------------------------------------------------------------------------------------------------------------------------------------------------------------------------------------------------------------------------------------------------------------------------------------------------------------------------------------------------------------------------------------------------------------------------------------------------------------------------------------------------------------------------------------------------------------------------------------------------------------------------------------------------------------------------------------------------------------------------------------------------------------------------------------------------------------------------------------------------------------------|----------------------------------|
|                                                                      |                           |                                                                                                                                                                                 |                                                                                             |                                                             |                                                                                | FKV Depressive coping, mean (SD): baseline 2.45 (.77); 3 month 2.24 (.71, p<0.05), 6 month 2.14 (.80, p<0.05), 12 month 2.05 (.65, p<0.01)<br>FKV Active problem oriented, mean (SD): baseline coping 3.41 (.73); 3 month 3.40 (.83, p=ns), 6 month 3.45 (.85, p=ns), 12 month 3.46 (.72, p=ns)<br>FKV Distraction/self-encouragement, mean (SD): baseline 3.23 (.98); 3 month 3.26 (.72, p=ns), 6 month 3.35 (.63, p=ns), 12 month 3.24 (.65, p=ns)<br>FKV Religiousness/search for meaning, mean (SD): baseline 2.86 (.79); 3 month 2.85 (.83, p=ns), 6 month 2.92 (.87, p=ns), 12 month 2.88 (.92, p=ns)<br>FKV Playing down/wishful thinking, mean (SD): baseline 2.61 (.98); 3 month 2.40 (1.01, p=ns), 6 month 2.25 (.88, p<0.05), 12 month 2.22 (.88, p<0.001)<br>SESA Self-acceptance, mean (SD): baseline 108.74 (20.06); 3 month 111.00 (19.05, p=ns), 6 month 113.06 (19.26, p<0.05), 12 month 115.91 (18.03, p<0.01) |                                  |
| Herschman, et al. <sup>38</sup> ; 2014; development al study; Canada | SLE                       | mobile app for adolescents to improve<br>1) Autonomy<br>2) Enabling symptom tracking<br>3) Facilitating communication with care providers and peers                             | n.a.                                                                                        | n.a.                                                        | n.a.                                                                           | Report describes the development of a mobile (smartphone) app for adolescents with lupus                                                                                                                                                                                                                                                                                                                                                                                                                                                                                                                                                                                                                                                                                                                                                                                                                                         | n.a.                             |
| Horton, et al. <sup>39</sup> ; 1997; survey; USA                     | SLE<br>IG n=145<br>IG n=8 | Lupus Line (telephone peer counselling service);<br>1) Intervention aimed to support people with SLE emotionally (in this case the satisfaction with the program was evaluated) | 1) Self-developed questionnaire                                                             | n=153<br>Mean age<br>Between 30<br>and 49 years<br>(64.5%). | n.a.                                                                           | High levels of satisfaction with 92% reporting at least moderate satisfaction with the service; 60% of respondents who reported a change in 6 "feeling" categories attributed this change to using Lupus Line. Fewer users reported a change in 4 specific behaviors since using the service, but more respondents attributed changes, when they occurred, to Lupus Line.                                                                                                                                                                                                                                                                                                                                                                                                                                                                                                                                                        | Not reported in the article.     |
| Horváth, et al. <sup>40</sup> ; 2017; quasi-experimental             | SSc<br>IG n=29<br>IG n=2  | hand physical therapy;<br>1) Hand function                                                                                                                                      | 1) Health Assessment Questionnaire (HAQ), Disabilities of the Arm, Shoulder and Hand (DASH) | n=31<br>Mean age = 59.7<br>(±14.5)                          | n=22<br>Mean age = 62.1 (±8.4)                                                 | 6 months IG improvement in HAQ and DASH scores compared to the baseline values (p<0.05). The improvement in median HAQ value (25%-75% quartiles) reached the clinical meaningful rate (baseline 1.125 /0.625-1.625/ versus 0.75 /0.25-1.5/ at six months). However,                                                                                                                                                                                                                                                                                                                                                                                                                                                                                                                                                                                                                                                              | No adverse events have occurred. |

| Study; Year; Design; Country                              | Population                                            | Intervention; Primary Outcome                                                                                      | Measurement                                                                                                                                            | n IG <sup>+</sup><br>Mean age<br>(±SD) <sup>o</sup> | n CG <sup>+</sup><br>Mean age<br>(±SD) <sup>o</sup><br>Control<br>intervention | Results                                                                                                                                                                                                                                                                                                                                                                                                                                                                                                                                                                                                                                                                                                                                                                                                                                                                                                                                                                                  | Adverse effects                  |
|-----------------------------------------------------------|-------------------------------------------------------|--------------------------------------------------------------------------------------------------------------------|--------------------------------------------------------------------------------------------------------------------------------------------------------|-----------------------------------------------------|--------------------------------------------------------------------------------|------------------------------------------------------------------------------------------------------------------------------------------------------------------------------------------------------------------------------------------------------------------------------------------------------------------------------------------------------------------------------------------------------------------------------------------------------------------------------------------------------------------------------------------------------------------------------------------------------------------------------------------------------------------------------------------------------------------------------------------------------------------------------------------------------------------------------------------------------------------------------------------------------------------------------------------------------------------------------------------|----------------------------------|
| study;<br>Hungary                                         | 👤 CG n=11<br>👤 IG n=11                                |                                                                                                                    |                                                                                                                                                        |                                                     | Similar therapy for their large joints                                         | comparing the results between the patients and the control groups, there were no significant difference in the values of the functional tests, both at baseline and at six-month follow-up.<br>IG: HAQ (median [IQR]): T0 (Baseline 1.125 [0.6-1.6]); T1 (3 weeks 0.937 [0.5-1.5]); T2 (6 months 0.75 [0.25-1.5]); TO-T1 p=0.042; TO-T2 p=0.017; DASH (median [IQR]): T0 (Baseline 34.2 [18.3-55.0]); T1 (3 weeks 29.3 [12.9-49.1]); T2 (Six months 32.5 [10.0-45.8]); TO-T1 p=0.001; TO-T2 p=0.023<br>CG: HAQ (median [IQR]): T0 (Baseline 0.875 [0.4-1.2]); T1 (3 weeks 1.18 [0.7-1.5]); T2 (6 months 0.875 [0.4-1.4]); TO-T1 p=0.378; TO-T2 p=0.442; DASH (median [IQR]): T0 (Baseline 37.5 [26.5-46.7]); T1 (3 weeks 38.7 [20.2-49.3]); T2 (6 months 37.8 [18.6-52.9]); TO-T1 p=0.007; TO-T2 p=0.948<br>Between groups (change in mean [95%CI]): HAQ-DI: IG -0.206 [-0.37 to -0.04]; CG 0.007 [-0.36 to 0.38]; p=0.217; DASH: IG -5.2[-9.3 to -1.1]; CG -2.29 [-8.5 to 4.0]; p=0.414 |                                  |
| Kankaya and Karadakovan <sup>41</sup> ; 2020; RCT; Turkey | SLE<br>👤 IG n=38<br>👤 IG n=2<br>👤 CG n=38<br>👤 CG n=2 | Web-based education and counselling; no primary outcome;<br>1) Self-efficacy<br>2) Fatigue<br>3) Care satisfaction | 1) Self-Efficacy for Managing Chronic Disease 6-Item Scale<br>2) Fatigue Severity Scale (FSS)<br>3) Patient Assessment of Chronic Illness Care (PACIC) | n=40<br>Mean age = 35.58 (±8.40)                    | n=40<br>Mean age = 39.00 (±12.71)<br>Usual care                                | Significant improvement in fatigue, self-efficacy and assessment of chronic illness care in the experimental group at the end of the study (p<0.05).<br>1) Post-intervention (month 6): IG 5.17 (1.87); CG 4.29 (2.15); p=0.04<br>2) Post-intervention (month 6): IG 3.88 (1.25); CG 5.03 (1.43); p=0.001<br>3) Post-intervention (month 6): IG 2.59 (0.33); CG 1.99 (0.34); p=0.000                                                                                                                                                                                                                                                                                                                                                                                                                                                                                                                                                                                                     | Not reported                     |
| Karlson, et al. <sup>42</sup> ; 2004; RCT; USA            | SLE<br>👤 IG n=63<br>👤 IG n=1<br>👤 CG n=56<br>👤 CG n=2 | Psychoeducational intervention;<br>1) Patient self-efficacy and partner support                                    | 1) Medical Outcomes Study Short Form 36 (SF-36) questionnaire                                                                                          | n=64<br>Mean age = 42.7 (±22.8)                     | n=58<br>Mean age = 40.8 (±11.1)<br>Attention intervention                      | Global mental health status at 12 months, as measured by the Short Form 36 survey, was 69 points in the experimental group compared with 58 points in the control group (p=0.04).<br>SF-36, global mental health (base: IG [61±23]; CG [61±23]; p=1.0; T6: IG [61±25]; CG [61±25]; p=1.0; T12: IG [69±26]; CG [58±23]; p=0.04)<br>SF-36, global physical function (base: IG [48±24]; CG [49±25]; p=0.9; T6: IG [52±26]; CG [47±24]; p=0.4; T12: IG [55±25]; CG [48±25]; p=0.2)                                                                                                                                                                                                                                                                                                                                                                                                                                                                                                           | Not reported in the article.     |
| Keramiotou, et al. <sup>43</sup> ; 2020; RCT; Greece      | SLE<br>👤 IG n=31<br>👤 IG n=1<br>👤 CG n=27<br>👤 CG n=3 | Individually tailored 30-min daily upper-limb exercise programme;<br>1) Function                                   | 1) Disabilities of Arm, Shoulder and Hand (DASH)                                                                                                       | n=32<br>Mean age = 43.34 (±8.90)                    | n=30<br>Mean age = 48.77 (±12.38)<br>Usual care                                | There was statistically significant difference between the comparison groups (exercise vs control) in relation to percentage change of DASH variable from baseline to 6 weeks (-33.72% vs -1.25%, p<0.001), 12 weeks (-43.41% vs -11.23%, p<0.001) and 24 weeks (-51.86% vs -7.10%, p<0.001).<br>DASH: Exercise group: baseline 39.02 (16.10); 6 weeks 27.82 (14.18), 12 weeks 21.49 (16.19), 24 weeks 19.09 (14.52); Control group: baseline 43.08 (16.39); 6 weeks 43.45 (19.36), 12 weeks 38.38 (16.29), 24 weeks 38.85 (18.90)                                                                                                                                                                                                                                                                                                                                                                                                                                                       | No adverse events have occurred. |

| Study; Year; Design; Country                                                        | Population                                        | Intervention; Primary Outcome                                                                                                                 | Measurement                                                                                                                                                                                       | n IG <sup>+</sup><br>Mean age<br>(±SD) <sup>o</sup> | n CG <sup>+</sup><br>Mean age<br>(±SD) <sup>o</sup><br>Control<br>intervention | Results                                                                                                                                                                                                                                                                                                                                                                                                                                                                                                                                                                                                                                                                                                                   | Adverse effects                  |
|-------------------------------------------------------------------------------------|---------------------------------------------------|-----------------------------------------------------------------------------------------------------------------------------------------------|---------------------------------------------------------------------------------------------------------------------------------------------------------------------------------------------------|-----------------------------------------------------|--------------------------------------------------------------------------------|---------------------------------------------------------------------------------------------------------------------------------------------------------------------------------------------------------------------------------------------------------------------------------------------------------------------------------------------------------------------------------------------------------------------------------------------------------------------------------------------------------------------------------------------------------------------------------------------------------------------------------------------------------------------------------------------------------------------------|----------------------------------|
| Khanna <sup>44</sup> ; 2019; study protocol, USA                                    | SSc                                               | Internet-based self-management program<br>1) Enhancing self-management                                                                        | 1) Managing Symptoms Scale on the PROMIS® Self-efficacy Short Form 8                                                                                                                              | n.a                                                 | n.a                                                                            | n.a                                                                                                                                                                                                                                                                                                                                                                                                                                                                                                                                                                                                                                                                                                                       | n.a                              |
| Khanna, et al. <sup>45</sup> ; 2020; RCT; USA                                       | SSc<br>IG n=123<br>IG n=11<br>CG n=120<br>CG n=13 | Internet-Based Self-Management Program;<br>1) Self-efficacy                                                                                   | 1) PROMIS Self-Efficacy for Managing Chronic Conditions instrument                                                                                                                                | n=134<br>Mean age = 54.3<br>(±10.1)                 | n=133<br>Mean age = 52.9 (±13.1)<br>Usual care                                 | No statistical differences between the 2 groups for the primary outcome (Patient-Reported Outcomes Measurement Information System Self-Efficacy for Managing Symptoms: mean change of 0.35 in the internet group versus 0.94 in the control group; P = 0.47). PROMIS self-efficacy; Managing symptoms: baseline: IG 47.41 (±9.15), CG 47.58 (±7.81), p=0.87; 16 weeks follow up: IG 47.53 (±8.50), CG 48.61 (±8.70). p=0.32; changes: IG 0.35 (±6.12), CG 0.94 (±6.79), p=0.47                                                                                                                                                                                                                                            | Not reported                     |
| Kristensen, et al. <sup>46</sup> ; 2019; RCT; Denmark                               | SSc<br>IG n=36<br>IG n=7<br>CG n=27<br>CG n=16    | Paraffin prior to hand exercises;<br>1) Function (hand)                                                                                       | 1) Hand Mobility in Scleroderma (HAMIS)                                                                                                                                                           | n=43<br>Mean age = 57.8<br>(±11.0)                  | n=43<br>Mean age = 60.4 (±10.5)<br>lukewarm water prior to hand exercises      | No statistically significant differences, within both groups, hand mobility improved on the HAMIS 6 months post baseline with -2.6 points (95% CI: -4.4; -0.8) in the paraffin group and -3.3 points (95% CI: -5.2; -1.5) in the water group. Improvements were maintained at 12-month follow-up. Significant improvements within groups at 6 and 12 months for both groups.<br>HAMIS<br>3 months: IG -0.4 (-2.2;1.5); CG -1.8 (-3.6;-0.1); difference between groups -0.6 (-4.3;3.0); p=0.7<br>6 months: IG -2.6 (-4.4;-0.8); CG 28 -3.3 (-5.2;-1.5); difference between groups 28 -1.3 (-4.7;2.1); p=0.5<br>12 months: IG -3.0 (-4.8;-1.2); CG 28 -2.9 (-4.6;-1.1); difference between groups 28 -2.1 (-5.5;1.3); p=0.2 | No adverse events have occurred. |
| Kusnanto, et al. <sup>47</sup> ; 2018; one-group pretest–posttest design; Indonesia | SLE<br>IG n=36                                    | Orem’s self-care model; primary outcome was not specified,<br>1) Self-care agency (SCA)<br>2) Self-care operation<br>3) Quality of life (QoL) | 1) Exercise of Self-Care Agency Scale<br>2) Self-Rated Abilities for Health Practices Scale<br>3) LupusPRO                                                                                        | n=36<br>Age range=19-44 years                       | n.a.                                                                           | Exercise of Self-Care Agency Scale: increased by an average of 19.93% (p < 0.001)<br>Self-Rated Abilities for Health Practices Scale: increased by an average of 17.53% (p < 0.001)<br>LupusPRO: increase by an average of 12.19% (p < 0.001)                                                                                                                                                                                                                                                                                                                                                                                                                                                                             | Not reported in the article.     |
| Kwakkenbos, et al. <sup>48</sup> ; 2014, single case study, The Netherlands         | SSc<br>IG n=1                                     | Cognitive-Behavioural Therapy;<br>1) Reduce emotional distress<br>2) Reduce concerns about the future                                         | 1) Not defined<br>2) Not defined<br>Measures used in the study:<br>- Depression (CES-D)<br>- Fear of progression (FoP-Q-SF)<br>- Anxiety (STAI short form)<br>- Fear of negative evaluation (FNE) | n=1<br>Age = 53                                     | n.a.                                                                           | Depression (CES-D) baseline: 27; post-treatment (change %): 24 (-11.1%); Follow-up (change %): 21 (-22.2%)<br>Fear of progression (FoP-Q-SF) baseline: 34; post-treatment (change %): 27 (-20.6 %); Follow-up (change %): 27 (-20.6 %)<br>Anxiety (STAI short form) baseline: 29; post-treatment (change %): 26 (-10.3 %); Follow-up (change %): 24 (-17.2 %)                                                                                                                                                                                                                                                                                                                                                             | Not reported in the article.     |

| Study; Year; Design; Country                                                                | Population                                    | Intervention; Primary Outcome                                                                                                                                 | Measurement                                                                                                                                                                                                                                        | n IG <sup>+</sup><br>Mean age<br>(±SD) <sup>o</sup> | n CG <sup>+</sup><br>Mean age<br>(±SD) <sup>o</sup><br>Control<br>intervention | Results                                                                                                                                                                                                                                                                                                                                                                                                                                                                                                                                                                                                                                                                                                                                                                                                                                                                                                                                                                                                                             | Adverse effects                                        |
|---------------------------------------------------------------------------------------------|-----------------------------------------------|---------------------------------------------------------------------------------------------------------------------------------------------------------------|----------------------------------------------------------------------------------------------------------------------------------------------------------------------------------------------------------------------------------------------------|-----------------------------------------------------|--------------------------------------------------------------------------------|-------------------------------------------------------------------------------------------------------------------------------------------------------------------------------------------------------------------------------------------------------------------------------------------------------------------------------------------------------------------------------------------------------------------------------------------------------------------------------------------------------------------------------------------------------------------------------------------------------------------------------------------------------------------------------------------------------------------------------------------------------------------------------------------------------------------------------------------------------------------------------------------------------------------------------------------------------------------------------------------------------------------------------------|--------------------------------------------------------|
|                                                                                             |                                               |                                                                                                                                                               |                                                                                                                                                                                                                                                    |                                                     |                                                                                | Fear of negative evaluation (FNE) baseline: 56; post-treatment (change %): 46 (-17.8 %): Follow-up (change %): 52 (-7.1 %)                                                                                                                                                                                                                                                                                                                                                                                                                                                                                                                                                                                                                                                                                                                                                                                                                                                                                                          |                                                        |
| Kwakkenbos, et al. <sup>49</sup> ; 2011; one-group pretest–posttest design; The Netherlands | SSc<br>IG n=34<br>CG n=7                      | Group-based psycho-educational programme; primary outcome was not specified,<br>1) Disease related cognitions<br>2) Depressed mood<br>3) Physical functioning | 1) Illness Cognitions Questionnaire (ICQ) and Acceptance Limitations Scale (ALS)<br>2) Depressed Mood subscale of the Impact of Rheumatic Diseases on General Health and Lifestyle (IRGL)<br>3) Scleroderma Health Assessment Questionnaire (SHAQ) | n=41<br><br>Mean age = 52.8 (±12.2)                 | n.a.                                                                           | Patients reported less helplessness after the intervention, and higher acceptance of their limitations. However, no difference in depressed mood and physical functioning was observed.<br>Acceptance (ICQa), mean(±SD), [95% CI]: pre 15.7 (±3.8), diff pre-post 0.53 [-0.43, 1.49], ES 0.13, diff pre-post 0.75 [-0.14, 1.65], ES 0.21, p=0.13<br>Helplessness (ICQa), mean(±SD), [95% CI]: pre 13.1 (±4.2), diff pre-post -1.24 [-2.27, -0.22], ES -0.32, diff pre-post -1.05 [-2.03, -0.08], ES -0.26, p=0.02<br>Acceptance of limitations (ALSb), mean(±SD), [95% CI]: pre 29.0 (±4.9), diff pre-post -1.60 [-3.22, 0.02], ES -0.28, diff pre-post -2.24 [-3.73, -0.75], ES -0.44, p=0.01<br>Depressive mood (IRGLc), mean(±SD), [95% CI]: pre 4.2 (±4.6), diff pre-post 0.13 [-1.07, 1.32], ES 0.02, diff pre-post -.05 [-1.47, 1.37], ES -0.02, p=0.48<br>Physical functioning (HAQ-DId), mean(±SD), [95% CI]: pre 0.89 (±0.6), diff pre-post 0.03 [-0.07, 0.14], ES -0.06, diff pre-post -.05 [-0.06, 17], ES -0.09, p=0.52 | Not reported in the article.                           |
| Landim, et al. <sup>50</sup> ; 2019; one-group pretest–posttest design; Brazil              | SSc<br>IG n=19<br>CG n=3                      | Home-based self-management program (Hands on-a hand care guide in SSc); no primary outcome specified;<br>1) Hand pain<br>2) Hand function                     | 1) Visual Analogue Scale (VAS)<br>2) Cochin Hand Function Scale (CHFS)                                                                                                                                                                             | n=22<br>Mean age = 48.09 (±11.67)                   | n.a.                                                                           | Significant improvements for hand pain (3.97 vs 2.21, ES: 0.69) and Cochin Hand Function Scale (19.24 vs 12.48, ES: 0.48).<br>Pain-VAS: baseline: 3.97 (±2.92); 4 weeks 2.61 (±2.11); 8 weeks 2.21 (±2.07); p=.0022; ES=0.6953<br>CHFS: baseline: 19.24 (±15.78); 4 weeks 16.86 (±15.42); 8 weeks 12.48 (±12.04); p<.0001; ES=0.4816.                                                                                                                                                                                                                                                                                                                                                                                                                                                                                                                                                                                                                                                                                               | No adverse events have occurred.                       |
| Landim, et al. <sup>51</sup> ; 2020; quasi-experimental study; Brazil                       | SSc<br>IG n=35<br>CG n=5<br>CG n=16<br>CG n=1 | Home-based self-management programme (same as in Landim, et al. <sup>50</sup> ); No primary outcome specified;<br>1) Hand pain<br>2) Hand function            | 1) Visual Analogue Scale (VAS)<br>2) Cochin Hand Function Scale (CHFS)                                                                                                                                                                             | n=40<br>Mean age = 47.6 (±9.8)                      | n=17<br>Mean age = 49.8 (±10.7)<br>No intervention                             | Outcome improvements were noted in the IG, CG did not change or had worsened.<br>VAS-pain: CG baseline 3.47 (±3.12), follow up 4.35 (±3.32); IG baseline 4.82 (±2.75), follow up 1.93 (±1.99); comparison between groups p=0.5310, between times p=0.0040, interaction group vs time p<.0001, ES=-1.48<br>CHFS: CG baseline 24.12 (±16.60), follow up 27.76 (±18.03); IG baseline 24.30 (±17.50), follow up 11.00 (±12.21); comparison between groups p=0.0561, between times p=0.0005, interaction group vs time p<.0001, ES=-1.06                                                                                                                                                                                                                                                                                                                                                                                                                                                                                                 | Not reported                                           |
| Li, et al. <sup>52</sup> ; 2020; RCT; Canada                                                | SLE<br>IG n=13                                | Physical Activity Counselling Program                                                                                                                         | 1) SenseWear Mini (BodyMedia, Inc., Pittsburgh, PA.)                                                                                                                                                                                               | n=16<br>Mean age = 49.9 (±12.2)                     | n=16<br>Mean age = 47.1 (±13.8)                                                | No significant between-group difference was found in any outcomes in participants with SLE.                                                                                                                                                                                                                                                                                                                                                                                                                                                                                                                                                                                                                                                                                                                                                                                                                                                                                                                                         | After starting the program, 23 of the 118 participants |

| Study; Year; Design; Country                           | Population                                                                                                                                                                                                                                                                        | Intervention; Primary Outcome                                                                                          | Measurement                                                                                                                                                                                                                                                                                                                                            | n IG <sup>±</sup><br>Mean age<br>(±SD) <sup>o</sup> | n CG <sup>±</sup><br>Mean age<br>(±SD) <sup>o</sup><br>Control<br>intervention | Results                                                                                                                                                                                                                                                                                                                                                                                                                                                                                                                                                                                                                                                                                                                                                                                                                                                                                                                                                                                                                                                                                                                                                                                                                                                                                                                                                                                                          | Adverse effects                                                                                                                                                                                                                                                                                                                                            |
|--------------------------------------------------------|-----------------------------------------------------------------------------------------------------------------------------------------------------------------------------------------------------------------------------------------------------------------------------------|------------------------------------------------------------------------------------------------------------------------|--------------------------------------------------------------------------------------------------------------------------------------------------------------------------------------------------------------------------------------------------------------------------------------------------------------------------------------------------------|-----------------------------------------------------|--------------------------------------------------------------------------------|------------------------------------------------------------------------------------------------------------------------------------------------------------------------------------------------------------------------------------------------------------------------------------------------------------------------------------------------------------------------------------------------------------------------------------------------------------------------------------------------------------------------------------------------------------------------------------------------------------------------------------------------------------------------------------------------------------------------------------------------------------------------------------------------------------------------------------------------------------------------------------------------------------------------------------------------------------------------------------------------------------------------------------------------------------------------------------------------------------------------------------------------------------------------------------------------------------------------------------------------------------------------------------------------------------------------------------------------------------------------------------------------------------------|------------------------------------------------------------------------------------------------------------------------------------------------------------------------------------------------------------------------------------------------------------------------------------------------------------------------------------------------------------|
|                                                        |  IG n=3<br> CG n=14<br> CG n=2 | with Use of Wearable Tracker;<br>1) Time spent in moderate/vigorous physical activity (MVPA [mins/day])                |                                                                                                                                                                                                                                                                                                                                                        |                                                     | Same intervention delayed                                                      | MVPA [mins/day]: IG baseline 21.8 (±28.5), 9 weeks 32.2 (±31.0); CG baseline 43.9 (±49.1), 9 weeks 46.3 (±45.8); Adjusted mean difference between groups (95% CI) 2.0 (-17.3, 21.3)                                                                                                                                                                                                                                                                                                                                                                                                                                                                                                                                                                                                                                                                                                                                                                                                                                                                                                                                                                                                                                                                                                                                                                                                                              | reported adverse events due to physical activity: 19 muscle pain (Immediate: n=10, Delay: n=9) and 4 ligament sprain (Immediate: n=3, Delay: n=1). Falls were reported by 5 participants in the Immediate Group (none happened during exercise), and 4 in the Delay Group (all happened during the waiting period). No other adverse events were reported. |
| Maddali-Bongi, et al. <sup>53</sup> ; 2011; RCT; Italy | SSc<br> IG n=20<br> CG n=15                                                                                     | Manual lymph drainage (MLD)<br>1) Reducing edema<br>2) Functionality of the hands<br>3) Quality of life and disability | 1) Volumetric test performed by slowly dipping the hand in a cylinder full of water<br>2) Hand Mobility in Scleroderma (HAMIS), perception of hand disability was scored by 4 visual analog scales (VAS)<br>3) Physical synthetic index (PSI) and the Mental synthetic index (MSI) of the Short Form 36 (SF-36), Health Assessment Questionnaire (HAQ) | n=20<br>Mean age = 57.2 (±10.23)                    | n=15<br>Mean age = 57.35 (±12.6)<br>observation group<br><br>No intervention   | In the intervention group, hand volume, the HAMIS test, and the 4 VAS were improved significantly at the end of treatment (P < 0.001). The results were maintained at T2 (P < 0.001). The HAQ and the PSI and MSI of the SF-36 also improved significantly at T1 (P < 0.001), but only PSI improvement was maintained at T2 (P < 0.001). In the observation group, no improvement at T1 and at T2 was observed. All of the patients were evaluated at enrolment (T0), at the end of the treatment (T1), and after a follow-up of 9 weeks (T2).<br>Hand volume, cm <sup>3</sup> , mean (SD): IG T0 340.0 (±59.51), T1 310.7 (±51.84), T2 316.6 (±61.76), within p=0.0001(T0-T1), p=0.0001(T0-T2), p=ns(T1-T2); OG T0 343.7 (±51.25), T1 345.3 (±46.56), T2 350.2 (±46.90), within p=ns(T0-T1), p=ns(T0-T2), p=ns(T1-T2); between groups p=ns(T0-T1), p<0.05(T0-T2), p<0.01(T1-T2)<br>HAMIS test, right hand, mean (SD): IG T0 8.15 (±4.28), T1 4.75 (±3.22), T2 5.7 (±4.27), within p=0.0001(T0-T1), p=0.0001(T0-T2), p=ns(T1-T2); OG T0 8.4 (±5.14), T1 8.53 (±4.53), T2 8.93 (±4.7), within p=ns(T0-T1), p=n(T0-T2), p=ns(T1-T2); between groups p=ns(T0-T1), p<0.01(T0-T2), p<0.05(T1-T2)<br>HAMIS test, left hand, mean (SD): IG T0 8.1 (±4.14), T1 4.35 (±3.17), T2 5.5 (±4.25), within p=0.0001(T0-T1), p=0.0001(T0-T2), p=ns(T1-T2); OG T0 8.33 (±4.80), T1 8.47 (±4.51), T2 8.73 (±5.06), within p=ns(T0- | No adverse events occurred.                                                                                                                                                                                                                                                                                                                                |



| Study; Year; Design; Country                           | Population                                    | Intervention; Primary Outcome                                                                                                                                       | Measurement                                                                                                                                                                                                                           | n IG <sup>‡</sup><br>Mean age<br>(±SD) <sup>¶</sup> | n CG <sup>‡</sup><br>Mean age<br>(±SD) <sup>¶</sup><br>Control<br>intervention | Results                                                                                                                                                                                                                                                                                                                                                                                                                                                                                                                                                                                                                                                                                                                                                                                                                                                                                                                                                                                                                                                                                                                                                                                 | Adverse effects              |
|--------------------------------------------------------|-----------------------------------------------|---------------------------------------------------------------------------------------------------------------------------------------------------------------------|---------------------------------------------------------------------------------------------------------------------------------------------------------------------------------------------------------------------------------------|-----------------------------------------------------|--------------------------------------------------------------------------------|-----------------------------------------------------------------------------------------------------------------------------------------------------------------------------------------------------------------------------------------------------------------------------------------------------------------------------------------------------------------------------------------------------------------------------------------------------------------------------------------------------------------------------------------------------------------------------------------------------------------------------------------------------------------------------------------------------------------------------------------------------------------------------------------------------------------------------------------------------------------------------------------------------------------------------------------------------------------------------------------------------------------------------------------------------------------------------------------------------------------------------------------------------------------------------------------|------------------------------|
|                                                        |                                               |                                                                                                                                                                     |                                                                                                                                                                                                                                       |                                                     |                                                                                | T1), p=ns(T0-T2), p=ns(T1-T2); between groups p=ns(T0-T1), p<0.01(T0-T2), p<0.05(T1-T2)<br>HAQ, mean (SD): IG T0 1.56 (±0.8), T1 0.88 (±0.7), T2 1.4 (±0.82), within p<0.001(T0-T1), p=ns(T0-T2), p<0.05(T1-T2); OG 1.47 (±0.90), T1 1.49 (±0.81), T2 1.53 (±0.94), within p=ns(T0-T1), p=ns(T0-T2), p=ns(T1-T2); between groups p=ns(T0-T1), p<0.05(T0-T2), p=ns(T1-T2), within p<0.0001(T0-T1), p<0.0001(T0-T2), p=ns(T1-T2); OG 39.19 (±6.95), T1 38.95 (±7.35), T2 37.01 (±5.34), within p=ns(T0-T1), p<0.05(T0-T2), p=ns(T1-T2); between groups p=ns(T0-T1), p<0.05(T0-T2), p<0.01<br>SF-36 PSI, mean (SD): IG T0 38.77 (±7.91), T1 44.79 (±8.27), T2 44.10 (±7.25), within p<0.0001(T0-T1), p<0.0001(T0-T2), p=ns(T1-T2); OG 39.19 (±6.95), T1 38.95 (±7.35), T2 37.01 (±5.34), within p=ns(T0-T1), p<0.05(T0-T2), p=ns(T1-T2); between groups p=ns(T0-T1), p<0.05(T0-T2), p<0.01<br>SF-36 MSI, mean (SD): IG T0 38.21 (±6.69), T1 44.43 (±6.84), T2 39.72 (±5.82), within p<0.0001(T0-T1), p=ns(T0-T2), p<0.0001(T1-T2); OG 37.15 (±6.38), T1 38.76 (±6.46), T2 37.30 (±6.41), within p=ns(T0-T1), p=ns(T0-T2), p<0.0001(T1-T2); between groups p=ns(T0-T1), p<0.01(T0-T2), p=ns |                              |
| Maddali-Bongi, et al. <sup>54</sup> ; 2009; RCT, Italy | SSc<br>IG n=16<br>IG n=4<br>CG n=14<br>CG n=6 | Combination of connective tissue massage and Mc Mennell joint manipulation;<br>1) Hand function                                                                     | 1) Hand Mobility in Scleroderma (HAMIS) test, Cochin hand functional disability scale, ROM (hand opening and fist closing expressed in centimetres were used to assess hand function)                                                 | n=20<br>Mean age = 56.4 (±10.2)                     | n=20<br>Mean age = 58.1 (±13.4)<br><br>Home exercises only                     | IG fist closure, HAMIS test and Cochin hand functional disability scale improved (p<0.0001); CG only fist closure at the end of the treatment (p<0.0001).<br><br>HAMIS test, mean (SD): IG pre 11.40 (±6.58), post 7.00 (±6.77), follow up 7.80 (±6.38); T0-T1 p<0.0001; T0-T2 p<0.0001; CG 10.75 (±4.60), post 11.10 (±4.61), follow up 10.95 (±3.97); T0-T1 p=ns; T0-T2 p=ns<br>Cochin hand functional disability scale, mean (SD): IG 33.05 (±24.89), post 20.30 (±21.56), follow up 22.10 (±21.01); T0-T1 p<0.0001; T0-T2 p<0.0001; CG 31.80 (±18.81), post 32.50 (±18.40), follow up 33.25 (±17.97); T0-T1 p=ns; T0-T2 p=ns<br>Hand opening, mean (SD): IG 15.60 (±1.09), post 16.03 (±1.40), follow up 15.57 (±1.60); T0-T1 p=ns; T0-T2 p=ns; CG 15.34 (±1.30), post 15.18 (±1.28), follow up 15.29 (±1.55); T0-T1 p=ns; T0-T2 p=ns<br>First closure, mean (SD): IG 2.24 (±1.60), post 1.47 (±1.42), follow up 1.45 (±1.25); T0-T1 p<0.0001; T0-T2 p<0.0001; CG 2.20 (±1.08), post 1.19 (±1.00), follow up 2.19 (±1.09); T0-T1 p<0.0001; T0-T2 p=ns                                                                                                                               | Not reported in the article. |
| Maddali-Bongi, et al. <sup>55</sup> ; 2009; RCT, Italy | SSc<br>IG n=6<br>IG n=4<br>CG n=7<br>CG n=3   | District specific and global rehabilitation program; no primary outcome defined,<br>1) Patients' global health condition<br>2) Specific body districts (hand, face) | Baseline (T0); end of the 9-week rehabilitation period (T1); IG 9-week follow-up (T2).<br>1) Medical Outcomes Survey Short Form (SF-36), Health Assessment Questionnaire Disability index (HAQ-DI)<br>2) Hand Mobility in Scleroderma | n=10<br>Mean age = 58.0 (±15.1)                     | n=10<br>Mean age = 55.7 (±14.9)<br><br>No intervention                         | IG, patients improved significantly at the end of the treatment, however, the significance was lost at the 9-week follow-up (excluded the HAMIS test (p<0.01) and mouth opening (p<0.01)).<br>CG did not show any significant improvement in general health condition, hands and face measures at the end of the study (no details displayed in the article). No between-groups testings.<br><br>Changes in the IG:                                                                                                                                                                                                                                                                                                                                                                                                                                                                                                                                                                                                                                                                                                                                                                     | Not reported in the article. |

| Study; Year; Design; Country                  | Population                                    | Intervention; Primary Outcome                                                                  | Measurement                                                                                                                                                               | n IG <sup>‡</sup><br>Mean age<br>(±SD) <sup>¶</sup> | n CG <sup>‡</sup><br>Mean age<br>(±SD) <sup>¶</sup><br>Control<br>intervention | Results                                                                                                                                                                                                                                                                                                                                                                                                                                                                                                                                                                                                                                                                                                                                                                                                                                                                                                                                                                                                                                                                                                | Adverse effects              |
|-----------------------------------------------|-----------------------------------------------|------------------------------------------------------------------------------------------------|---------------------------------------------------------------------------------------------------------------------------------------------------------------------------|-----------------------------------------------------|--------------------------------------------------------------------------------|--------------------------------------------------------------------------------------------------------------------------------------------------------------------------------------------------------------------------------------------------------------------------------------------------------------------------------------------------------------------------------------------------------------------------------------------------------------------------------------------------------------------------------------------------------------------------------------------------------------------------------------------------------------------------------------------------------------------------------------------------------------------------------------------------------------------------------------------------------------------------------------------------------------------------------------------------------------------------------------------------------------------------------------------------------------------------------------------------------|------------------------------|
|                                               |                                               |                                                                                                | (HAMIS) Test, Duruoz scale, range of motion [ROM] (hand opening, fist closing), water volumetric test, mouth opening, 16-Item VAS-face                                    |                                                     |                                                                                | MSI (SF-36), IG, mean (SD): T0 36.9 (±6.0), T1 44.6 (±6.0); T2 34.7 (±4.6); within T0-T1 p<0.005; within T0-T2 p=ns<br>PSI (SF-36), IG, mean (SD): T0 37.9 (±7.9), T1 44.9 (±8.6); T2 39.0 (±7.9); within T0-T1 p<0.05; within T0-T2 p=ns<br>HAQ, IG, mean (SD): T0 1.2 (±1.2), T1 0.9 (±1.1 0.8); T2 (±1.2); within T0-T1 p<0.05; within T0-T2 p=ns<br>HAMIS TEST, IG, mean (SD): T0 10.2 (±4.8), T1 6.0 (±3.7); T2 6.4 (±7.4); within T0-T1 p<0.005; within T0-T2 p<0.01<br>DURUOZ SCALE, IG, mean (SD): T0 23.3 (±19.9), T1 14.0 (±16.0); T2 17.3 (±17.2); within T0-T1 p<0.01; within T0-T2 p=ns<br>Hand opening* (cm), IG, mean (SD): T0 16.7 (±1.3), T1 16.4 (±1.7); T2 14.7 (±3.1); within T0-T1 p=ns; within T0-T2 p=ns<br>Fist closure* (cm), IG, mean (SD): T0 1.4 (±2.2), T1 0.4 (±0.9); T2 0.5 (±0.8); within T0-T1 p<0.05; within T0-T2 p=ns<br>Mouth opening (cm), IG, mean (SD): T0 3.4 (±1.1), T1 4.0 (±1.2); T2 4.8 (±1.4); within T0-T1 p<0.05; within T0-T2 p<0.01<br>FACE-VAS, IG, mean (SD): T0 3.7 (±1.3), T1 3.1 (±1.1); T2 3.8 (±0.9); within T0-T1 p<0.002; within T0-T2 p=ns |                              |
| Maddali-Bongi, et al.<br>56; 2010; RCT; Italy | SSc<br>IG n=18<br>IG n=2<br>CG n=16<br>CG n=4 | Combination of Kabat's technique, connective massage and kinesitherapy;<br>1) Face functioning | Baseline (T0), end of the treatment (T1) and 9 weeks of follow-up (T2)<br>1) Mouth Handicap in Systemic Sclerosis (MHSS); Mouth opening in centimeters, Rodnan skin score | n=20<br>Mean age = 57.20 (±10.23)                   | n=20<br>Mean age = 57.35 (±12.60)<br><br>home exercise program alone           | At T1, both groups improved in mouth opening (P < 0.05), but at T2 only in IG maintained.<br>IG, facial skin score ameliorated at T1 and maintained at T2 (P < 0.05 vs. T0), no changes in CG.<br>No changes in SF-36 and HAQ for both groups.<br>MHSS improved in IG at T1 (P < 0.001), no changes in CG.<br><br>Mouth opening (cm), mean (SD): IG T0 3.80 (±1.06); T1 4.28 (±0.99); T2 4.58 (±1.16); between groups T0-T1 p<0.05; T0-T2 p<0.001<br>Skin score, mean (SD): IG T0 3.90 (±1.55); T1 1.60 (±0.99); T2 1.75 (±1.02); between groups T0-T1 p<0.001; T0-T2 p<0.001<br>MHSS, mean (SD): IG T0 17.20 (±5.15); T1 16.25 (±5.64); T2 18.50 (±5.23); between groups T0-T1 p<0.001; T0-T2 p=ns<br><br>Mouth opening (cm), mean (SD): CG T0 4.00 (±1.09); T1 4.48 (±1.04); T2 4.20 (±1.05); between groups T0-T1 p<0.001; T0-T2 p=ns<br>Skin score, mean (SD): CG T0 3.55 (±1.43); T1 3.15 (±1.63); T2 3.35 (±1.18); between groups T0-T1 p=ns; T0-T2 p=ns<br>MHSS, mean (SD): CG T0 18.10 (±5.36); T1 18.00 (±4.97); T2 17.90 (±4.03); between groups T0-T1 p=ns; T0-T2 p=ns                      | Not reported in the article. |
| Maisiak, et al.<br>57; 1996; RCT; USA         | SLE<br>IG n=8                                 | telephone-based counselling intervention:                                                      | 1) Arthritis Impact Measurement Scales (AIMS)                                                                                                                             | n=8                                                 | n=7                                                                            | significantly improved the psychological status of the SLE patients (P < 0.05, effect size = 1.13, responsiveness = 0.77) in comparison to usual care.                                                                                                                                                                                                                                                                                                                                                                                                                                                                                                                                                                                                                                                                                                                                                                                                                                                                                                                                                 | Not reported in the article  |

| Study; Year; Design; Country                                                   | Population                   | Intervention; Primary Outcome                                                                                                                | Measurement                                                                                                                | n IG <sup>+</sup><br>Mean age<br>(±SD) <sup>o</sup> | n CG <sup>+</sup><br>Mean age<br>(±SD) <sup>o</sup><br>Control<br>intervention | Results                                                                                                                                                                                                                                                                                                                                                                                                                                                                                                                                                                                                                                                                                                                                                                                                           | Adverse effects              |
|--------------------------------------------------------------------------------|------------------------------|----------------------------------------------------------------------------------------------------------------------------------------------|----------------------------------------------------------------------------------------------------------------------------|-----------------------------------------------------|--------------------------------------------------------------------------------|-------------------------------------------------------------------------------------------------------------------------------------------------------------------------------------------------------------------------------------------------------------------------------------------------------------------------------------------------------------------------------------------------------------------------------------------------------------------------------------------------------------------------------------------------------------------------------------------------------------------------------------------------------------------------------------------------------------------------------------------------------------------------------------------------------------------|------------------------------|
|                                                                                | 👤 CG n=7                     | 1) Improving psychological status                                                                                                            |                                                                                                                            | Mean age = 37.13 (SD not reported)                  | Mean age = 40.43 (SD not reported) usual care                                  | AIMS Psychological Dysfunction, mean (SD not reported): IG pre 3.81, post 4.30 (adjusted mean for baseline=4.52), CG pre 4.76, post 3.76 (adjusted mean for baseline=3.49); ES 1.13, p=0.02                                                                                                                                                                                                                                                                                                                                                                                                                                                                                                                                                                                                                       |                              |
| Mancuso and Poole <sup>58</sup> ; 2009; series of single-case studies; USA     | SSc<br>👤 IG n=3              | Paraffin and active hand exercises;<br>1) Improve activity and participation                                                                 | 1) Duruoz Hand Index (DHI), Scleroderma Functional Assessment Questionnaire (SFAQ), Applied Dexterity items from the AHFT. | n=3<br>Age = 83, 47, 61 years                       | n.a.                                                                           | Case 1: no improvements in hand function during daily activities on most items included on the DHI and SFAQ. The participant did, however, report that she felt the intervention helped overall in her daily activities, including playing the piano, which was a daily hobby for this participant.<br>Case 2: no improvements in hand function related to activity/participation on most items included on the DHI and SFAQ. The participant did report, however, that she felt the intervention helped overall in her daily activities at both work and home.<br>Case 3: experienced improvements in measures of both body function/structure and measures of activity/participation. Additionally, this participant reported improvements in several daily activities not reflected in the DHI and SFAQ tools. | Not reported in the article. |
| Martin <sup>59</sup> ; 2009; single case study; Brazil                         | SSc<br>👤 IG n=1              | Myofascial release; primary outcome was not specified,<br>1) Functionality of temporomandibular joint<br>2) Functionality of the fingers/arm | 1) functionality (pain and clicking noise), mouth opening<br>2) Goniometer/centimeters                                     | n=1<br>no age reported                              | n.a.                                                                           | 1) Pre-intervention: pain and bilateral clicking noises; post-intervention the absence of pain and a sensation of “normality” in the TMJ when eating<br>Mouth opening: pre-intervention distance between the upper and lower teeth 26mm; post-intervention 34mm<br>2) Pre-intervention: edema throughout the RUL, especially the extensor tendons (radial and ulnar) of the wrist; edema on fascia of the palm of the hand; reduction in the length of the fingers and the distance between them, decrease in ROM; post-intervention: remaining nodules, pain in the fingers and the muscles of the wrist, during activities and on intense touch.                                                                                                                                                                | Not reported in the article. |
| McNearney, et al. <sup>60</sup> ; 2013; one-group pretest–posttest design; USA | SSc<br>👤 IG n=14<br>👤 IG n=3 | Transcutaneous electrical nerve stimulation (TENS);<br>1) Neurogastric functioning                                                           | 1) Multi-channel surface electrogastrigraphy (EGG);                                                                        | n=17<br>Mean age = 55 (±2.28)                       | n.a.                                                                           | Only after prolonged TENS, the percentages of normal slow waves and average slow wave coupling (especially channels 1, 2 reflecting gastric pacemaker and corpus regions) were significantly increased (visit 2 compared to visit 1 for baseline 82.1±4.2% vs. 63.4±5.6%, respectively, p=0.02 and modest increases in postprandial intervals (83.05±4.29% vs. 78.4±0.49%, respectively, p=NS). The percentage of normal slow waves was significantly correlated to sympathovagal balance.                                                                                                                                                                                                                                                                                                                        | Not reported in the article. |
| Miljeteig and Graue <sup>61</sup> ; 2009; action research                      | SLE<br>👤 IG n=13             | Educational program; primary outcome was not specified,<br>1) Pain                                                                           | 1) Visual analogue scale (VAS)<br>2) Visual analogue scale (VAS)<br>3) Medical Outcome Scale Short Form-36 (SF-36)         | n=13<br>Mean age = 35.3 (±10.5)                     | n.a.                                                                           | The mean scale score for general health (SF-36) improved significantly (p = 0.029) from 47.3 (SD 17.5) to 56.0 (SD 13.2) (n = 13). Mean mental health scale score showed an insignificant increase (p = 0.091) from                                                                                                                                                                                                                                                                                                                                                                                                                                                                                                                                                                                               | Not reported in the article. |

| Study; Year; Design; Country                                                                     | Population                                                                | Intervention; Primary Outcome                                                                                | Measurement                                                                                         | n IG <sup>+</sup><br>Mean age<br>(±SD) <sup>o</sup>                                         | n CG <sup>+</sup><br>Mean age<br>(±SD) <sup>o</sup><br>Control<br>intervention | Results                                                                                                                                                                                                                                                                                                                                                                                    | Adverse effects                  |
|--------------------------------------------------------------------------------------------------|---------------------------------------------------------------------------|--------------------------------------------------------------------------------------------------------------|-----------------------------------------------------------------------------------------------------|---------------------------------------------------------------------------------------------|--------------------------------------------------------------------------------|--------------------------------------------------------------------------------------------------------------------------------------------------------------------------------------------------------------------------------------------------------------------------------------------------------------------------------------------------------------------------------------------|----------------------------------|
| approach;<br>Norway                                                                              |                                                                           | 2) Fatigue<br>3) Quality of life                                                                             |                                                                                                     |                                                                                             |                                                                                | 76.7 (SD 16.3) to 84.0 (SD 10.9 (n = 13). The results related to scale scores for pain, fatigue and physical well-being were non-significant.                                                                                                                                                                                                                                              |                                  |
| Mitropoulos, et al. <sup>62</sup> ;<br>Mitropoulos, et al. <sup>63</sup> ;<br>2019; RCT;<br>UK   | SSc<br>👤 n=29<br>👤 n=3Ω                                                   | High-intensity interval training (HIIT) combined with resistance training (RT);<br>1) Microvascular function | 1) Laser Doppler Fluximetry and Iontophoresis                                                       | n=16<br>Mean age = 69.6 (±11.4)                                                             | n=16<br>Mean age = 63.6 (±12.2)<br>No intervention                             | Compared to control group after the exercise intervention, the time to peak endothelial-dependent (91 ±42 s, d=1.06, p=0.007), the endothelial-independent function (3.16 ± 2, d=1.17, p=0.005), and baseline (5.71 ± 4.4, p < 0.05) and peak (15.4 ± 7.5, p < 0.05) transcutaneous oxygen pressure were significantly improved.                                                           | No adverse events have occurred. |
| Mitropoulos, et al. <sup>64</sup> ;<br>2018;<br>RCT;<br>United Kingdom                           | SSc<br>👤 n=31 <sup>o</sup><br>👤 n=3                                       | High-intensity interval training (HIIT) and arm cranking (ACE);<br>1) Microcirculation of the digital area   | 1) Laser Doppler Fluximetry and Iontophoresis technique in a temperature-controlled room (22–24 °C) | IG (ACE) n=11<br>Mean age (ACE) = 69.1 (±9.7)<br>IG (CE) n=11<br>Mean age (CE) = 65.1 (±10) | n=12<br>Mean age = 62.2 (±14.3)<br>No exercise intervention                    | Endothelial-dependent vasodilation improvement was greater in the arm-cranking (p < 0.05, d = 1.07) in comparison to other groups.                                                                                                                                                                                                                                                         | No adverse events have occurred. |
| Mouthon and Thombs <sup>65</sup> ;<br>2020; study protocol,<br>Canada                            | SSc                                                                       | SPIN-HAND Program<br>1) Difference in Cochin Hand Function Scale                                             | 1) Cochin Hand Function Scale (CHFS)                                                                | n.a                                                                                         | n.a                                                                            | n.a                                                                                                                                                                                                                                                                                                                                                                                        | n.a                              |
| Mugii, et al. <sup>66</sup> ;<br>2006;<br>quasi-experimental study;<br>Japan                     | SSc<br>👤 IC n=39<br>👤 IC n=6<br>👤 CG n=16<br>👤 CG n=5<br>healthy controls | Self-administered stretching of each finger;<br>1) Functionality                                             | 1) Passive Range of motion (pROM), Health assessment questionnaire disability index (HAQ-DI)        | n=45<br>Mean age = 48.6 (±17.3)                                                             | n=21<br>Mean age = 49.0 (±13.0)<br>healthy controls<br>No intervention         | The total pROM was significantly improved in each finger after 1 month of finger stretching. The total pROM was further improved or maintained within 1 year after the first visit.<br>HAQ-DI total not significant (baseline 0.48 ± 0.45; 1 year 0.38 ± 0.47)                                                                                                                             | Not reported in the article.     |
| Mugii, et al. <sup>67</sup> ;<br>2018;<br>retrospective,<br>observational cohort study;<br>Japan | SSc<br>👤 IC n=35<br>👤 IG n=8                                              | Self-administered stretching of each finger;<br>1) Functionality                                             | 1) Passive Range of motion (pROM), Health assessment questionnaire disability index (HAQ-DI)        | n=43<br>Median age = 51 (range 7-73)                                                        | n.a.                                                                           | pROM significantly improved in each finger after 1 year and further improved or maintained within 3 years; in 37 of 43 patients (86%) improved or maintained total pROM and hand function within 9 years; improvement of total pROM was lost in 6 of 43 SSc patients (14%); HAQ-DI also increased in these 6 patients.<br>HAQ-DI was analyzed in 29 patients; no significant improvements. | Not reported in the article.     |
| Murphy <sup>68</sup> ;<br>2019; study protocol, USA                                              | SSc                                                                       | Intensive treatment<br>1) improve arm function                                                               | 1) physical function and symptoms with the self-report questionnaire, quickDASH                     | n.a                                                                                         | n.a                                                                            | n.a                                                                                                                                                                                                                                                                                                                                                                                        | n.a                              |
| Murphy, et al. <sup>69</sup> ;<br>2018;<br>one-group                                             | SSc<br>👤 IG n=18<br>👤 IG n=3                                              | Occupational therapy<br>1) Extremity function (contractures)                                                 | 1) QuickDASH questionnaire                                                                          | n=21                                                                                        | n.a.                                                                           | At 8 weeks significant improvement in the QuickDASH (P = 0.0012). Approximately one-half of participants in the sample achieved                                                                                                                                                                                                                                                            | No adverse events occurred.      |

| Study; Year; Design; Country                                           | Population                                            | Intervention; Primary Outcome                                                              | Measurement                                                                                                                                                              | n IG <sup>+</sup><br>Mean age<br>(±SD) <sup>o</sup> | n CG <sup>+</sup><br>Mean age<br>(±SD) <sup>o</sup><br>Control<br>intervention | Results                                                                                                                                                                                                                                                                                                                                                                                                                                                                                                                                                                                                                                                                                                                                                                                                                                                                                                                                                                                                                                                                                                                                                                                                                                                                                                                                                                                                                                                                                                                                                                                                                                                                                                                                                   | Adverse effects              |
|------------------------------------------------------------------------|-------------------------------------------------------|--------------------------------------------------------------------------------------------|--------------------------------------------------------------------------------------------------------------------------------------------------------------------------|-----------------------------------------------------|--------------------------------------------------------------------------------|-----------------------------------------------------------------------------------------------------------------------------------------------------------------------------------------------------------------------------------------------------------------------------------------------------------------------------------------------------------------------------------------------------------------------------------------------------------------------------------------------------------------------------------------------------------------------------------------------------------------------------------------------------------------------------------------------------------------------------------------------------------------------------------------------------------------------------------------------------------------------------------------------------------------------------------------------------------------------------------------------------------------------------------------------------------------------------------------------------------------------------------------------------------------------------------------------------------------------------------------------------------------------------------------------------------------------------------------------------------------------------------------------------------------------------------------------------------------------------------------------------------------------------------------------------------------------------------------------------------------------------------------------------------------------------------------------------------------------------------------------------------|------------------------------|
| pretest–<br>posttest<br>design; USA                                    |                                                       |                                                                                            |                                                                                                                                                                          | Mean age = 47.9<br>(±16.1)                          |                                                                                | improvement in the QuickDASH that exceeded minimally important differences.<br>QuickDASH score (squares mean (SE) changes over time) baseline 49.3 (4.6); 4 weeks 42.7 (4.8); 8 weeks 35.2 (4.8), p=0.0012                                                                                                                                                                                                                                                                                                                                                                                                                                                                                                                                                                                                                                                                                                                                                                                                                                                                                                                                                                                                                                                                                                                                                                                                                                                                                                                                                                                                                                                                                                                                                |                              |
| Navarrete-<br>Navarrete, et<br>al. <sup>70</sup> ; 2010;<br>RCT; Spain | SLE<br>👤 IC n=17<br>👤 IC n=4<br>👤 CG n=23<br>👤 CG n=1 | Cognitive-<br>behavioural<br>intervention;<br>1) Stress reduction                          | 1) Stress Vulnerability Inventory (SVI), Survey of Recent Life Experiences (SRLE), Beck Depression Inventory (BDI), Spielberger's State-Trait Anxiety Inventory (STAI-T) | n=21<br>Mean age =<br>43.77 (±89.88)                | n=24<br>Mean age =<br>40.41 (±10.67)<br><br>Usual care                         | significantly reduced stress, anxiety and depression; after therapy, levels of anxiety and depression were considerably lower and even fell below the population average.<br><b>SVI</b> , mean (±SD): T0 IG 12.5 (±4.9), CG 12.5 (±5.9), p=0.963; T3 IG 7.8 (±4), CG 11.6 (±6), p=0.017; T9 IG 7.5 (±6.6), CG 11.3 (±6.1), p=0.050; T15 IG 6.3 (±6.3), CG 12.1 (±5.5), p=0.001: within groups IG T0–T3 (ES 1.07, p<0.008); T0–T9 (ES 0.86, p<0.008); T0–T15 (ES 1.09, p<0.008); within groups CG T0–T3 (ES 0.13, p=ns); T0–T9 (ES 0.19, p=ns); T0–T15 (ES 0.06, p=ns)<br><b>SRLE</b> , mean (±SD): T0 IG 90 (±21.6), CG 91.9 (±19.8), p=0.776; T3 IG 79.2 (±6.7), CG 93 (±17.7), p=0.012; T9 IG 79.5 (±16.7), CG 94.4 (±20.1), p=0.011; T15 IG 82.3 (±16.4), CG 99.2 (±26.3), p=0.016: within groups IG T0–T3 (ES 0.57, p=ns); T0–T9 (ES 0.55, p=ns); T0–T15 (ES 0.41, p=ns); within groups CG T0–T3 (ES 0.05, p=ns); T0–T9 (ES 0.12, p=ns); T0–T15 (ES 0.31, p=ns)<br><b>BDI</b> , mean (±SD): T0 IG 13.3 (±10), CG 16.6 (±11.2), p=0.308; T3 IG 7.8 (±6.6), CG 17.1 (±13.1), p=0.006; T9 IG 10.3 (±9.4), CG 14.8 (±11), p=0.161; T15 IG 7.6 (±7.2), CG 16.5 (±10.8), p=0.003: within groups IG T0–T3 (ES 0.66, p=ns); T0–T9 (ES 0.31, p=ns); T0–T15 (ES 0.66, p=ns); within groups CG T0–T3 (ES 0.03, p=ns); T0–T9 (ES 0.16, p=ns); T0–T15 (ES 0.00, p=ns)<br><b>STAI-T</b> , mean (±SD): T0 IG 63 (±28.2), CG 68.8 (±24), p=0.465; T3 IG 44 (±31), CG 69.1 (±26.3), p=0.008; T9 IG 43.4 (±33.6), CG 62.2 (±30.4), p=0.064; T15 IG 42.4 (±26.4), CG 66.5 (±27.3), p=0.007a: within groups IG T0–T3 (ES 0.63, p=ns); T0–T9 (ES 0.63, p=ns); T0–T15 (ES 0.75, p=ns); within groups CG T0–T3 (ES 0.01, p=ns); T0–T9 (ES 0.2, p=ns); T0–T15 (ES 0.09, p=ns) | Not reported in the article. |
| Naylor <sup>71</sup> ;<br>1982; single<br>case study;<br>USA           | SSc<br>👤 IG n=1                                       | Oral augmentation<br>program (exercises);<br>Improve<br>1) Mastication and<br>oral hygiene | 1) Mouth opening: The oral opening was measured from the incisal edge of the maxillary right central incisor to the incisal edge of the mandibular right lateral incisor | n=1<br>Age = 38                                     | n.a.                                                                           | 6-mm (27.3%) increase in the oral aperture obtained in this case was achieved in only 12 weeks.                                                                                                                                                                                                                                                                                                                                                                                                                                                                                                                                                                                                                                                                                                                                                                                                                                                                                                                                                                                                                                                                                                                                                                                                                                                                                                                                                                                                                                                                                                                                                                                                                                                           | No adverse effects occurred. |
| Naylor, et al.<br><sup>72</sup> ; 1984; RCT;<br>USA                    | SSc<br>IG n=5<br>CG n=4<br>Gender not<br>reported.    | Comparison of two<br>different exercise<br>programs<br>1) Oral opening                     | 1) Mouth opening                                                                                                                                                         | n=5<br>Age not<br>reported.                         | n=4<br>Age not<br>reported.                                                    | IG mean improvement 5.6 mm (range, 3 to 8 mm) CG 3.0 mm (range, 0 to 6 mm), p=ns                                                                                                                                                                                                                                                                                                                                                                                                                                                                                                                                                                                                                                                                                                                                                                                                                                                                                                                                                                                                                                                                                                                                                                                                                                                                                                                                                                                                                                                                                                                                                                                                                                                                          | Not reported in the article. |

| Study; Year; Design; Country                                                       | Population                | Intervention; Primary Outcome                                                                                                                                           | Measurement                                                                                                                                                                                                          | n IG <sup>‡</sup><br>Mean age<br>(±SD) <sup>¶</sup>   | n CG <sup>‡</sup><br>Mean age<br>(±SD) <sup>¶</sup><br>Control<br>intervention | Results                                                                                                                                                                                                                                                                                                                                                                                                                                                                                                                                                | Adverse effects                                                                                                                                                                                |
|------------------------------------------------------------------------------------|---------------------------|-------------------------------------------------------------------------------------------------------------------------------------------------------------------------|----------------------------------------------------------------------------------------------------------------------------------------------------------------------------------------------------------------------|-------------------------------------------------------|--------------------------------------------------------------------------------|--------------------------------------------------------------------------------------------------------------------------------------------------------------------------------------------------------------------------------------------------------------------------------------------------------------------------------------------------------------------------------------------------------------------------------------------------------------------------------------------------------------------------------------------------------|------------------------------------------------------------------------------------------------------------------------------------------------------------------------------------------------|
|                                                                                    |                           |                                                                                                                                                                         |                                                                                                                                                                                                                      |                                                       | "facial grimacing" exercises                                                   |                                                                                                                                                                                                                                                                                                                                                                                                                                                                                                                                                        |                                                                                                                                                                                                |
| Neville, et al. <sup>73</sup> ; 2016; qualitative interview study; Canada          | SLE<br>IG n=43            | Development of the Lupus Interactive Navigator (LIN), a web-based self-management program for persons with SLE, and;<br>1) Test the LIN for usability and acceptability | 1) Number of log-ins, duration of each session, contacted for a 30-minute telephone interview to assess their opinions about the LIN and to identify areas for improvement.                                          | n=43<br>Mean age = 43.6 (±15.9)                       | n.a.                                                                           | Median time spent on LIN 16.3 minutes (interquartile range [IQR]:13.7, 53.5), median number of sessions 2 (IQR: 1, 3). Interview: LIN was easy to use, would recommend, 73% of the participants rated all topics helpful to very helpful, useful to those newly diagnosed with SLE.                                                                                                                                                                                                                                                                    | Not reported in the article.                                                                                                                                                                   |
| Ng and Chan <sup>74</sup> ; 2007; quasi-experimental study; China                  | SLE<br>IG n=56<br>CG n=20 | Group Psychosocial Program;<br>1) Psychological Well-Being                                                                                                              | 1) Self-administered questionnaire designed, including mental health (Chinese version of General Health Questionnaire-30 (GHQ-30)), and self-esteem (Chinese version of the Rosenberg Self-Esteem Scale (RSE))       | n=56<br>Mean age = 42.5 (range 20 to 55) <sup>¶</sup> | n=20<br>Mean age = 42.5 (range 20 to 55) <sup>¶</sup><br>no intervention       | Better scores in self-esteem (p < 0.001) and GHQ (p < 0.001) after the group (within groups).<br>RSE IG pre 24.50, post 28.14, p<0.001; CG pre 23.45, post 18.45, p<0.001<br>GHQ-30 IG pre 38.23, post 19.02, p<0.001; CG pre 31.05, post 66.45, p<0.001                                                                                                                                                                                                                                                                                               | Not reported in the article.                                                                                                                                                                   |
| O'Riordan, et al. <sup>75</sup> ; 2017; mixed methods; Ireland                     | SLE<br>IG n=21            | Fatigue and Activity Management Education (FAME); primary outcome was not specified,<br>1) Occupational participation<br>2) Fatigue                                     | 1) Frenchay Activities Index (FIA)<br>2) Fatigue Severity Scale (FSS)                                                                                                                                                | n=21<br>Mean age = 48.05 (±15.25)                     | n.a.                                                                           | No significant differences in the FIA or the FSS scores over time. Data collection occurred before intervention: Time 1 (T1); immediately after intervention: Time 2 (T2); and eight weeks after completion of FAME: Time 3 (T3).<br>FAI 31, median (range): T1 (22–41), T2 32 (16–41), T3 29 (14–39); T1-T2 p=0.726; T2-T3 p=0.609; T1-T3 p=0.753<br>FSS, median (range): T1 5.33 (1.9–6.9), T2 5.11 (3.4–6.4), T3 5.11 (2.9–6.2); T1-T2 p=0.370; T2-T3 p=1.000; T1-T3 p=0.306                                                                        | FAI scores either remained the same or reduced slightly; This could be viewed as an adverse event given the importance of occupational participation for physical and psychological wellbeing. |
| O'Connor, et al. <sup>76</sup> ; 2016; series of single-case studies (ABA); Canada | SSc<br>IG n=6             | Osteopathic manipulative treatment (OMT); no primary outcome defined,<br>1) Hand function<br>2) Disease symptoms<br>3) Functional status                                | 1) Hand stiffness, range of motion of the fingers (ROM), distal upper limbs skin score, disease symptoms (pain, dyspnea and fatigue), hand and global disability, work disability and health-related quality of life | n=6<br>Mean age = 50.17 (±9.85)                       | n.a.                                                                           | All participants (n=6/6) improved in hand stiffness and in range of motion of the fingers, and most improved on distal upper limbs skin score (n=4/6). Disease symptoms improved (pain: n=6/6, dyspnea: n=3/4, fatigue: n=4/6) as did functional status (global disability: n=5/5, work disability: n=4/6, health related quality of life, physical (n=6/6) and mental (n=4/6) components). When comparisons were possible, almost all observed improvements were greater than minimal clinically important differences suggested for this population. | No adverse events occurred.                                                                                                                                                                    |

| Study; Year; Design; Country                                                  | Population                                       | Intervention; Primary Outcome                                                         | Measurement                                                                                                                                                                                                                                                                                                                                 | n IG <sup>+</sup><br>Mean age<br>(±SD) <sup>o</sup> | n CG <sup>+</sup><br>Mean age<br>(±SD) <sup>o</sup><br>Control<br>intervention | Results                                                                                                                                                                                                                                                                                                                                                                                                                                                                                                                                                                                                                                                                                                                                                                                                                                                                                                                                                | Adverse effects                                          |
|-------------------------------------------------------------------------------|--------------------------------------------------|---------------------------------------------------------------------------------------|---------------------------------------------------------------------------------------------------------------------------------------------------------------------------------------------------------------------------------------------------------------------------------------------------------------------------------------------|-----------------------------------------------------|--------------------------------------------------------------------------------|--------------------------------------------------------------------------------------------------------------------------------------------------------------------------------------------------------------------------------------------------------------------------------------------------------------------------------------------------------------------------------------------------------------------------------------------------------------------------------------------------------------------------------------------------------------------------------------------------------------------------------------------------------------------------------------------------------------------------------------------------------------------------------------------------------------------------------------------------------------------------------------------------------------------------------------------------------|----------------------------------------------------------|
| Oliveira, et al. <sup>77</sup> ; 2009; quasi-experimental study; Brazil       | SSc<br>☉ IC n=7<br>☉ CG n=7<br>healthy controls  | Aerobic exercise;<br>1) Aerobic capacity                                              | 1) Cardiopulmonary stress test, blood lactate concentration assessment, oxygen saturation assessment                                                                                                                                                                                                                                        | n=7<br>Mean age = 45.57 (±8.22)                     | n=7 healthy controls<br>Mean age = 43.29 (±4.89)<br><br>Same as IG             | After 8 weeks SSc patients and controls significant improvement in VO2 peak (19.72 ± 3.51 vs. 22.27 ± 2.53 and 22.94 ± 4.70 vs. 24.55 ± 3.00, respectively; p = 0.006 time effect; and p = 0.468 interaction effect); no differences between groups (p = 0.149); SSc and control higher exercise intensity (1.43 ± 0.51 vs. 1.84 ± 0.33 and 1.11 ± 0.45 vs. 1.59 ± 0.25, respectively; p = 0.01 for time effect; p = 0.088 for group effect; and p = 0.848 for interaction effect) measured by peak blood lactate; resting oxygen saturation did not improve with exercise for either the SSc or the control group when compared to baseline data (90.71 ± 5.79 vs. 92.43 ± 8.42 and 97.00 ± 1.15 vs. 97.43 ± 0.53, respectively; p = 0.481 for time effect; p = 0.671 for interaction effect; and p = 0.032 for group effect).                                                                                                                        | No worsening of the disease because of the intervention. |
| Parisi, et al. <sup>78</sup> ; 2017; one-group pretest-posttest design; Italy | SSc<br>☉ IG n=53                                 | Neuromuscular Taping;<br>1) Hand functioning                                          | (T0) and immediately at the end of the treatment (T1) and after one month (T2) three months (T3) and six months (T4)<br><br>1) Cochin Hand Functional Disability scale (CHFDS), Modified Rodnan Skin Score (MRSS), Hand Mobility in Scleroderma (HAMIS), Dreiser Algo - Functional Index (IAFD), pain using the Visual Analogic scale (VAS) | n=53<br>Mean age = 50.79 (±8.89)                    | n.a.                                                                           | Cochin Hand Functional Disability scale, Hand Mobility in Sclerodermia, Modified Rodnan Skin Score and Dreiser Algo - Functional Index scores showed statistical significant differences during all the period; moreover, a reduction of pain has been observed.<br>CHFDS: T0 34 (30-38); T1 19 (15-24); T2 23 (21-26); T3 27 (24-32); T4 31 (27-39); p T0/T4 0,000; P T4-T0 0,000; P T1-T0 0,000<br>MRSS: T0 15,0 (13-19); T1 10 (8-14); T2 13 (10-15); T3 15 (12-17); T4 15 (13-19); p T0/T4 0,000; P T4-T0 0,31; P T1-T0 0,000<br>HAMIS: T0 12 (10-17); T1 7 (5-10); T2 9 (8-12); T3 10 (8-14); T4 12 (9-16); p T0/T4 0,000; P T4-T0 0,31; P T1-T0 0,000<br>IAFD: T0 21 (18-29); T1 13 (11-16); T2 15 (14-17); T3 19 (16-21); T4 21 (19-25); p T0/T4 0,000; P T4-T0 0,18; P T1-T0 0,000<br>VAS: T0 60,6 (40,4-77,5); T1 10,6 (6,2-20,5); T2 20,2 (11,5-32,9); T3 36,8 (24,2-48,1); T4 53,7 (41,5-62,5); p T0/T4 0,000; P T4-T0 0,000; P T1-T0 0,000 | No adverse events occurred.                              |
| Perandini, et al. <sup>79</sup> ; 2014; quasi-experimental study; Brazil      | SLE<br>☉ IG n=8<br>☉ CG n=10<br>healthy controls | 12-week exercise training program;<br>1) Cytokines and soluble TNF receptors (sTNFRs) | 1) Cytokines and sTNFRs. IFN-, IL-10, IL-6, TNF, sTNFR1, and sTNFR2 were measured by a multiplex human panel using a Luminex 200 apparatus.                                                                                                                                                                                                 | n=8<br>Mean age = 35.8 (±6.5)                       | n=10 (healthy controls)<br>Mean age = 30.6 (±5.2)<br><br>Same Exercises        | After exercise training program, a decrease in resting TNFR2 levels (p=0.025) and a tend to reduction interleukin (IL)-10 levels (p=0.093); resting levels of IL-6, IL-10, and TNF-α reached HC levels (p=0.05). Detailed values are not reported (figures only).                                                                                                                                                                                                                                                                                                                                                                                                                                                                                                                                                                                                                                                                                      | Not reported in the article.                             |
| Piga, et al. <sup>80</sup> ; 2014; RCT; Italy                                 | SSc<br>☉ IC n=9<br>☉ CG n=8                      | Recovery of Movement and Telemonitoring (Re.Mo.Te.); telemonitoring approach to self- | 1) Dreiser's index (Functional Index for Hand OA, FIHOA), Health Assessment Questionnaire (HAQ), the Hand Mobility in Scleroderma (HAMIS) test                                                                                                                                                                                              | n=9<br>Mean age = 57.0 (±10.0)                      | n=8<br>Mean age = 57.4 (±11.7)                                                 | Patients with SSc showed an improvement of FIHOA in both arms (p < 0.01) but the HAQ (p = 0.016) and the HAMIS test (right hand p = 0.016, left hand p = 0.075) improved significantly only in the experimental arm.<br>Dreiser's Index, mean (±SD): IG baseline 13.9 (± 6.0); IG 6th week 9.9 (± 6.8); IG 12th week 7.7 (± 5.2); withingroup p=0.006; CG baseline 14.0 (±                                                                                                                                                                                                                                                                                                                                                                                                                                                                                                                                                                             | No adverse events have occurred.                         |

| Study; Year; Design; Country                                                   | Population                   | Intervention; Primary Outcome                                                                                                                        | Measurement                                                                                                                                                                                                             | n IG <sup>+</sup><br>Mean age<br>(±SD) <sup>o</sup>        | n CG <sup>+</sup><br>Mean age<br>(±SD) <sup>o</sup><br>Control<br>intervention | Results                                                                                                                                                                                                                                                                                                                                                                                                                                                                                                                                                                                                                                                                                                                                                                                                                                          | Adverse effects                  |
|--------------------------------------------------------------------------------|------------------------------|------------------------------------------------------------------------------------------------------------------------------------------------------|-------------------------------------------------------------------------------------------------------------------------------------------------------------------------------------------------------------------------|------------------------------------------------------------|--------------------------------------------------------------------------------|--------------------------------------------------------------------------------------------------------------------------------------------------------------------------------------------------------------------------------------------------------------------------------------------------------------------------------------------------------------------------------------------------------------------------------------------------------------------------------------------------------------------------------------------------------------------------------------------------------------------------------------------------------------------------------------------------------------------------------------------------------------------------------------------------------------------------------------------------|----------------------------------|
|                                                                                |                              | managed kinesiotherapy sessions;<br>1) Hand function                                                                                                 |                                                                                                                                                                                                                         |                                                            | Kinesiotherapy, no monitoring                                                  | 6.4); CG 6th week 12.0 (± 6.5); CG 12th week 9.50 (± 5.2), within p=0.006, between groups p=0.496<br>HAQ, mean (±SD): IG baseline 1.49 (± 0.4); IG 6th week 0.76 (± 0.6); IG 12th week 0.81 (± 0.6); withingroup p=0.016; CG baseline 1.56 (± 0.7); CG 6th week 1.06 (± 0.6); CG 12th week 1.09 (± 0.5), within p=0.063, between groups p=0.287<br>HAMIS R hand, mean (±SD): IG baseline 5.2 (± 6.2); IG 6th week 3.8 (± 6.6); IG 12th week 3.3 (± 6.0); withingroup p=0.016; CG baseline 4.7 (±3.0); CG 6th week 3.2 (± 2.4); CG 12th week 3.2 (± 2.4), within p=0.104, between groups p=0.832<br>HAMIS L hand, mean (±SD): IG baseline 4.7 (± 4.1); IG 6th week 3.1 (± 4.3); IG 12th week 2.2 (± 3.2); withingroup p=0.075; CG baseline 2.2 (± 2.0); CG 6th week 1.6 (± 2.0); CG 12th week 1.7 (± 2.1), within p=0.529, between groups p=0.401 |                                  |
| Pinto, et al. <sup>81</sup> ; 2011; one-group pretest–post test design; Brazil | SSc<br>♀ IG n=11             | Exercise Training Program; primary outcome was not specified.<br>1) Muscle strength<br>2) Muscle function<br>3) Muscle damage<br>4) Aerobic capacity | 1) One-Repetition-Maximum test (1-RM)<br>2) Timed up-and-go (TUG), and timed-stands tests<br>3) Blood concentration of creatine kinase (CK) and aldolase<br>4) Cardiopulmonary Exercise Test (VO <sub>2</sub> peak, HR) | n=11<br>Mean age = 44 (±13)                                | n.a.                                                                           | 1) Leg press (mean kg) (pre 67 [±23]; post 95 [±27]; p=0.0006 ES=1.6)<br>Bench press (mean kg) (pre 37 [±17]; post 42 [±17]; p=0.08 ES=0.5)<br>Handgrip (mean kg) (pre 20 [±9]; post 22 [±11]; p=0.02 ES=0.2)<br>Low back strength (mean kg) (pre 59 [±27]; post 73 [±24]; p=0.001 ES=1.4)<br>2) Timed-up-and-go (mean s) (pre 6.9 [±0.7]; post 6.3 [±0.7]; p=0.12 ES=0.6)<br>Timed-stands (mean n) (pre 15 [±2]; post 17 [±3]; p=0.04 ES=1.3)<br>3) CK (pre 5.2 [±2.3]; post 5.4 [±2.3]);<br>Aldolase (pre 113 [±87]; post 122 [±90]; p=0.1 and ES=0.2)<br>4) VO <sub>2</sub> peak (pre 21.6 [±1.2], post 22.1 [±1.6]; p = 0.7; ES = 0.2)<br>Heart rate after the exercise training program (pre 101.7 [±3.5], post: 92.8 [±5.1]; p = 0.02; ES = 0.8).                                                                                          | No adverse events have occurred. |
| Pizzo, et al. <sup>82</sup> ; 2003; quasi-experimental study; Italy            | SSc<br>♀ IG n=10             | Exercise program (mouth-stretching and oral augmentation exercises);<br>1) mouth opening                                                             | 1) Distance between the incisal edge of upper and lower first incisors                                                                                                                                                  | n=5<br>Dentate subjects<br><br>Mean age = 48.0 (±8.51)     | n=5<br>Edentulous subjects <sup>①</sup><br><br>Mean age = 65.6 (±3.97)         | After 18 weeks mouth opening improved in subjects, without significant differences between groups.<br>Dentate mouth opening mm (mean±SD) (T0 [26.6±2.3]; T1 [36.4±2.51]; change in mm [37.3±9.88]; p<0.001)<br>Edentulous mouth opening mm (mean±SD) (T0 [25.4±0.89]; T1 [37±1.58]; change in mm [45.78±7.26]; p<0.001)<br>All mouth opening mm (mean±SD) (T0 [26±1.76]; T1 [6.7±2]; change in mm [41.54±9.32]; p<0.001)                                                                                                                                                                                                                                                                                                                                                                                                                         | No adverse events have occurred. |
| Poole, et al. <sup>83</sup> ; 2013; one-group pretest–post test design; USA    | SSc<br>♀ IG n=54<br>♂ IG n=7 | Mail-delivered self-management program; primary outcome was not specified,                                                                           | 1) Health log, Arthritis Self-Efficacy Scale (ASS), The Health Assessment Questionnaire (HAQ), Scleroderma Functional Assessment Questionnaire, Multidimensional Assessment of Fatigue Scale, The Center for            | n=61<br>Mean age (only for completers n=49) = 53.9 (±12.5) | n.a.                                                                           | Only statistically significant improvement was in self-efficacy for pain.<br>Self-efficacy pain (mean[SD]): pre 5.2 [±2.7]; post [6.4 [±2.7]; change 1.2 [±2.9]; p=0.006<br>Self-efficacy function (mean[SD]): pre 7.6 [±3.0]; post [7.4 [±2.2]; change -0.2 [±2.8]; p=0.59                                                                                                                                                                                                                                                                                                                                                                                                                                                                                                                                                                      | Not reported in the article.     |



| Study; Year; Design; Country                                                   | Population                   | Intervention; Primary Outcome                                                                                                 | Measurement                                                                                                                                                                                                                                                                        | n IG <sup>+</sup><br>Mean age<br>(±SD) <sup>o</sup> | n CG <sup>+</sup><br>Mean age<br>(±SD) <sup>o</sup><br>Control<br>intervention | Results                                                                                                                                                                                                                                                                                                                                                                                                                                                                                                                                                                                                                                                                                                                                                                                                                                                                                                                                                                                                                                                                                                                                    | Adverse effects              |
|--------------------------------------------------------------------------------|------------------------------|-------------------------------------------------------------------------------------------------------------------------------|------------------------------------------------------------------------------------------------------------------------------------------------------------------------------------------------------------------------------------------------------------------------------------|-----------------------------------------------------|--------------------------------------------------------------------------------|--------------------------------------------------------------------------------------------------------------------------------------------------------------------------------------------------------------------------------------------------------------------------------------------------------------------------------------------------------------------------------------------------------------------------------------------------------------------------------------------------------------------------------------------------------------------------------------------------------------------------------------------------------------------------------------------------------------------------------------------------------------------------------------------------------------------------------------------------------------------------------------------------------------------------------------------------------------------------------------------------------------------------------------------------------------------------------------------------------------------------------------------|------------------------------|
|                                                                                |                              | 1) Effectiveness of the program                                                                                               | Epidemiologic Studies Depression Scale (CES-D), Program evaluation interviews                                                                                                                                                                                                      |                                                     |                                                                                | Self-efficacy other (mean[SD]): pre 6.4 [±2.6]; post [7.0 [±2.2]; change 0.6[±3.0]; p=0.18<br>Self-efficacy total (mean[SD]): pre 6.6 [±2.1]); post [6.5 [±2.5]; change -0.1 [±2.8]; p=0.86<br>Multidimensional fatigue scale (MAF) (mean[SD]): pre 26.1 [±11.5]; post [24.6 [±11.6]; change -1.5 [±8.1]; p=0.20<br>Depression (CES-D) (mean[SD]): pre 14.4 [±10.9]; post [14.3 [±10.8]; change -0.1 [±7.9]; p=0.93<br>Activity disability (HAQ) (mean[SD]): pre 0.9 [±0.7]; post [0.9 [±0.7]; change 0.0 [±0.4]; p=0.56<br>Pain (mean[SD]): pre 2.9 [±2.6]; post [2.8 [±2.6]; change -0.05 [±1.9]; p=0.87<br>Hand disability (SFAQ) (mean[SD]): pre 6.8 [±5.8]; post [6.4 [±5.5]; change -0.3 [±2.8]; p=0.39<br>Number doctor visits (mean[SD]): pre 6.6 [±6.5]; post [5.9 [±6.2]; change -0.6 [±5.5]; p=0.19<br>Number ED visits (mean[SD]): pre 0.2 [±0.6]; post [0.2 [±0.6]; change 0 [±0]; p=1.0<br>Number of overnight stays in hospital (mean[SD]): pre 0.0 [±0.2]; post [0.1 [±0.5]; change 0.1 [±0.5]; p=0.38<br>Total number of nights spent in hospital (mean[SD]): pre 0.1 [±0.4]; post [0.4 [±1.8]; change 0.3 [±1.8]; p=0.38 |                              |
| Poole, et al.<br><sup>84</sup> ; 2014; one-group pretest–post test design; USA | SSc<br>♀ IG n=14<br>♂ IG n=2 | interactive internet-based SSc self-management program; primary outcome was not specified,<br>1) Effectiveness of the program | 1) The Chronic Disease Self-Efficacy Scale (SE Scale), The Health Education Impact Questionnaire (heiQ), The Patient Activation Measure (PAM), The Center for Epidemiologic Studies Depression Scale (CES-D), The Health Assessment Questionnaire (HAQ) disability index, pain VAS | n=16<br>Mean age = 52.2 (±10.2)                     | n.a.                                                                           | There were significant improvements in mean scores for ability to manage care (effect size [ES] 0.62, P = 0.025) and health efficacy (ES 0.72, P = 0.012), and significant decreases in fatigue (ES -0.55, P = 0.045) and depression (ES -0.71, P 0.013).<br>SE Scale (mean[SD]): pre 57.3 [±11.7]; post 63.9 [±13.1]; change 6.52; ES 0.46; p=0.084<br>heiQ (mean[SD]): pre 114.6 [±9.9]; post 120.6 [±7.7]; change 6.03; ES 0.72; p=0.012<br>PAM (mean[SD]): pre 38.5 [±5.2]; post 41.5 [±5.0]; change 3.00; ES 0.62; p=0.025<br>CES-D (mean[SD]): pre 20.7 [±9.6]; post 16.4 [±8.9]; change -4.25; ES -0.71; p=0.013<br>HAQ DI (mean[SD]): pre 1.0 [±0.6]; post 1.1 [±0.5]; change 0.01; ES 0.02; p=0.93<br>Pain VAS (mean[SD]): pre 6.7 [±1.6]; post 6.3 [±1.5]; change -0.48; ES -0.31; p=0.24<br>Fatigue VAS (mean[SD]): pre 8.1 [±1.4]; post 7.6 [±1.4]; change -0.52; ES -0.55; p=0.05                                                                                                                                                                                                                                             | Not reported in the article. |

| Study; Year; Design; Country                                                | Population                                                                     | Intervention; Primary Outcome                                                                                                                                                                                                         | Measurement                                                                                                                                                                                                                                                                                                                                                                                                                                                                                                                          | n IG <sup>+</sup><br>Mean age<br>(±SD) <sup>o</sup> | n CG <sup>+</sup><br>Mean age<br>(±SD) <sup>o</sup><br>Control<br>intervention                                     | Results                                                                                                                                                                                                                                                                                                                                                                                                                                                                                                                                                                                                                                                                                                                                                                                                                                                                                                                                                                                         | Adverse effects                  |
|-----------------------------------------------------------------------------|--------------------------------------------------------------------------------|---------------------------------------------------------------------------------------------------------------------------------------------------------------------------------------------------------------------------------------|--------------------------------------------------------------------------------------------------------------------------------------------------------------------------------------------------------------------------------------------------------------------------------------------------------------------------------------------------------------------------------------------------------------------------------------------------------------------------------------------------------------------------------------|-----------------------------------------------------|--------------------------------------------------------------------------------------------------------------------|-------------------------------------------------------------------------------------------------------------------------------------------------------------------------------------------------------------------------------------------------------------------------------------------------------------------------------------------------------------------------------------------------------------------------------------------------------------------------------------------------------------------------------------------------------------------------------------------------------------------------------------------------------------------------------------------------------------------------------------------------------------------------------------------------------------------------------------------------------------------------------------------------------------------------------------------------------------------------------------------------|----------------------------------|
|                                                                             |                                                                                |                                                                                                                                                                                                                                       |                                                                                                                                                                                                                                                                                                                                                                                                                                                                                                                                      |                                                     |                                                                                                                    | Self-rated health (mean[SD]): pre 3.8 [±0.8]; post 3.8 [±0.7]; change 0; ES 0                                                                                                                                                                                                                                                                                                                                                                                                                                                                                                                                                                                                                                                                                                                                                                                                                                                                                                                   |                                  |
| Poole, et al. <sup>85</sup> ; 2010; one-group pretest–post test design; USA | SSc<br>♀ IG n=15<br>♂ IG n=2                                                   | Structured oral hygiene instructions and facial and hand exercises;<br>1) Oral hygiene                                                                                                                                                | 1) Patient Hygiene Performance Index (PHP).                                                                                                                                                                                                                                                                                                                                                                                                                                                                                          | n=17<br>Mean age = 54,0<br>(±SD not reported)       | n.a.                                                                                                               | At 6-month intervention, there was a significant decrease (improvement) in mean PHP scores.<br><br>PHP score (mean [±SD]): baseline (3.3 [±0.64], range (1.8–4.2); pre-intervention (2.9 [±0.64], range 1.7–3.8); post-intervention (2.7 [+0.51], range 1.8–3.7); p<0.05 from baseline to post-intervention                                                                                                                                                                                                                                                                                                                                                                                                                                                                                                                                                                                                                                                                                     | Not reported in the article.     |
| Prado, et al. <sup>86</sup> ; 2013; RCT; Brazil                             | SLE (childhood onset)<br><br>IC n=10 <sup>o</sup><br>CG n=9<br>Healthy CG n=10 | Supervised aerobic training program<br>1) Improving the cardiorespiratory capacity                                                                                                                                                    | 1) Cardiorespiratory exercise test was performed on a treadmill (Oxygen consumption (VO2) and carbon dioxide output, Heart Rate (HR), Peak oxygen consumption (peak VO2), VAT and RCP                                                                                                                                                                                                                                                                                                                                                | IC n=10<br><br>Mean age = 12.9<br>(±2.3)            | CG n=9<br><br>Mean age = 13.0 (±1.8)<br><br>No training<br><br>Healthy controls n=10<br><br>Mean age = 12.0 (±1.8) | exercise training program was effective in promoting significant increases in time-to exhaustion (P = 0.01; ES = 1.07), peak speed (P = 0.01; ES = 1.08), peak VO2 (P = 0.04; ES = 0.86), CR (P = 0.06; ES = 0.83), and in ΔHRR1 and ΔHRR2 (P = 0.003; ES = 1.29 and P = 0.0008; ES = 1.36, respectively) compared with CG; cardiorespiratory parameters were comparable to healthy controls: ANOVA analysis (P > 0.05). SLEDAI-2K scores remained stable throughout the study.                                                                                                                                                                                                                                                                                                                                                                                                                                                                                                                 | No adverse events have occurred. |
| Prado, et al. <sup>87</sup> ; 2011; single case study; Brazil               | Juvenile SLE (JSLE) and antiphospho lipid syndrome<br>♂ IG n=1                 | Exercise training; primary outcome was not specified,<br>1) Physical capacity<br>2) Functioning                                                                                                                                       | 1) V02max, time to exhaustion, peak exercise intensity<br>2) Visual analog scale scores (VAS)                                                                                                                                                                                                                                                                                                                                                                                                                                        | n=1<br><br>Age: 15                                  | n.a.                                                                                                               | All the cardiopulmonary parameters improved: V02max pre 30.6, post 41.6, change +36.0%<br>time to exhaustion pre 7.15, post 12, change +67.8%<br>peak exercise intensity pre 3-0, post 3.5-0, change +16.7%<br>VAS improved patient's evaluation (pre = 8, post = 10), parents' evaluation (pre = 8 post = 10), physicians' evaluation (pre = 6 post = 9)                                                                                                                                                                                                                                                                                                                                                                                                                                                                                                                                                                                                                                       | No adverse events have occurred. |
| Ramsey-Goldman, et al. <sup>88</sup> , 2000; pilot RCT; USA                 | SLE<br>♀ IG n=5 (AER)<br>♂ IG n=5 (ROM)                                        | AER= aerobic exercise group;<br>ROM= ROM exercise group;<br>1) Fatigue,<br>2) Functional status,<br>3) Lupus disease activity and prednisone dose,<br>4) Cardiovascular fitness,<br>5) Isometric strength<br>6) Bone mineral density, | 1) Fatigue Severity Scale (FSS)<br>2) Short-Form 36 (SF-36) physical function scale<br>3) Systemic Lupus Activity Measure (SLAM)<br>4) Exercise treadmill, following the Naughton protocol with max. exercise in METS<br>5) Two lower extremity muscle groups (knee flexors and extensors): isokinetic exercise machine, the CYBEX<br>6) Bone densitometry measurements of lumbar spine and femoral neck (hip): QDR-2000 bone densitometer<br>7) Parathyroid hormone: IncStar N-tact PTH SP Kit Assay (iPTH IRMA) Osteocalcin: Metra | N=5<br>Mean age = 33.89 (range 24.16-49.88)         | N=5<br>Mean age = 43.16 (range 19.11-64.23)                                                                        | Patients in both exercise groups showed some improvement in fatigue, functional status, cardiovascular fitness, and muscle strength. Both groups showed increased bone turnover, but BMD was unchanged. <b>Baseline:</b> SLAM: IG AER: mean 4.40 range 1-12; IG ROM: mean 5.60 range 2-8. <b>METS:</b> IG AER: mean 8.82 range 6.3-11.5; IG ROM: mean 7.34 range 3.5-10.1. <b>FSS:</b> IG AER: mean 4.45 range 2.8-6.0; IG ROM: 4.73 range 4.4-5.2; <b>SF-36:</b> IG AER: mean 80.00 range 65-95; IG ROM: mean 73.00 range 55-100. <b>Muscle strength</b> (newton-meters) Hamstring (mean R and L): IG AER: mean 53.33 range 41.8-71.6; IG ROM: mean 41.87 range 29.7-60.8; Quadriceps (mean R and L): IG AER: mean 84.09 range 64.8-99-9; IG ROM: mean 74.79 range 45.9-109.3. <b>Bone density</b> (T-score): Lumbar %: IG AER: mean 93.80 range 75-112; IG ROM: mean 98.20 range 74-139; Hip %: IG AER: mean 93.60 range 79-108; IG ROM: mean 85.40 range 71-97. <b>Bone chemistries:</b> PTH | n.a.                             |

| Study; Year; Design; Country                                    | Population                                      | Intervention; Primary Outcome                                       | Measurement                                                                                    | n IG <sup>+</sup><br>Mean age<br>(±SD) <sup>o</sup> | n CG <sup>+</sup><br>Mean age<br>(±SD) <sup>o</sup><br>Control<br>intervention | Results                                                                                                                                                                                                                                                                                                                                                                                                                                                                                                                                                                                                                                                                                                                                                                                                                                                                                                                                                                                                                                                                                                                                                                                                                                                                                                                                                                                                                                                                                                                                                                                                                                                                                                 | Adverse effects                                                                                                                                                                                 |
|-----------------------------------------------------------------|-------------------------------------------------|---------------------------------------------------------------------|------------------------------------------------------------------------------------------------|-----------------------------------------------------|--------------------------------------------------------------------------------|---------------------------------------------------------------------------------------------------------------------------------------------------------------------------------------------------------------------------------------------------------------------------------------------------------------------------------------------------------------------------------------------------------------------------------------------------------------------------------------------------------------------------------------------------------------------------------------------------------------------------------------------------------------------------------------------------------------------------------------------------------------------------------------------------------------------------------------------------------------------------------------------------------------------------------------------------------------------------------------------------------------------------------------------------------------------------------------------------------------------------------------------------------------------------------------------------------------------------------------------------------------------------------------------------------------------------------------------------------------------------------------------------------------------------------------------------------------------------------------------------------------------------------------------------------------------------------------------------------------------------------------------------------------------------------------------------------|-------------------------------------------------------------------------------------------------------------------------------------------------------------------------------------------------|
|                                                                 |                                                 | 7) Bone biomechanical markers (Parathyroid hormone and osteocalcin) | Biosystems Novocalcin immunoassay (Metra Biosystems, Inc., Mountain View, CA)                  |                                                     |                                                                                | (pg/ml): IG AER: mean 31.20 range 16-42; IG ROM: 25.80 range 5-67; Osteocalcin (mg/ml): IG AER: mean 3.32 range 1.6-4.6; IG ROM: mean 1.96 range 0.7-038.<br><i>Change Phase I – baseline: SLAM:</i> IG AER: mean -0.80 (95%CI) -2.78, 1.18, IG ROM: mean -0.80 (95%CI) -1.98, 0.38; <b>METS:</b> IG AER: mean 0.86 (95%CI) 0.48, 1.24; IG ROM: mean 0.47 (95%CI) -0.01, 0.96. <b>FSS:</b> IG AER: mean -0.78 (95%CI) -1.07, -0.49; IG ROM: mean -0.47 (95%CI) -1.26, 0.32. <b>SF:</b> IG AER: mean 10.0 (95%CI) 3.71, 16.29; IG ROM: mean 6.00 (95%CI) -12.94, 24.94;<br><i>Phase II – baseline: SLAM:</i> IG AER: mean 2.80 (95%CI) 0.90, 4.70; IG ROM: mean 0.40 (95%CI) -2.27, 3.07. <b>METS:</b> IG AER: mean 0.64 (95%CI) -0.11, 1.39; IG ROM: mean 1.40 (95%CI) -4.68, 7.48. <b>FSS:</b> IG AER: mean -0.71 (95%CI) -1.23, -0.18; IG ROM: mean -0.68 (95%CI) -1.22, -0.13; <b>SF-36:</b> IG AER: mean 7.00 (95%CI) -4.80, 18.80; IG ROM: mean 2.5 (95%CI) -23.11, 28.11. <b>Muscle strength</b> (newton-meters) Hamstring (mean R and L): IG AER: mean 11.28 (95%CI) 3.31-19.24; IG ROM: mean 19.25 (95%CI) 8.63, 29.87; Quadriceps (mean R and L): IG AER: mean 12.21 (95%CI) -3.04, 27.46; IG ROM: mean 22.64 (95%CI) 13.44, 31.84. <b>Bone mineral density</b> (% T-score difference): Lumbar: IG AER: mean -0.20 (95%CI) -2.26, 1.86; IG ROM: mean -5.00 (95%CI) -15.00, 5.00; Hip: IG AER: mean 1.40 (95%CI) -7.43, 10.23; IG ROM: mean -0.75 (95%CI) -2.88, 1.38. <b>Bone chemistries:</b> PTH (pg/ml): IG AER: mean 6.60 (95%CI) -6.43, 19.63; IG ROM: mean 5.75 (95%CI) -7.45, 18.95; Osteocalcin (mg/ml): IG AER: mean -0.28 (95%CI) -0.92, 0.36; IG ROM: mean 0.90 (95%CI) 0.24, 1.56. |                                                                                                                                                                                                 |
| Rannou, et al. <sup>89</sup> ; 2016; RCT; France                | SSc<br>IG n=95<br>IG n=15<br>CG n=86<br>CG n=22 | Physical therapy program;<br>1) Disability                          | 1) Health assessment Questionnaire Disability Index (HAQ DI) score at 12 months                | n=110<br><br>Mean age = 52.7 (±14.8)                | n=108<br><br>Mean age = 53.1 (±14.4)<br><br>Usual care                         | No differences in the primary outcome (adjusted between-group difference at 12 months -0.01 [95% CI -0.15, 0.13]; p=0.86); at 1 month significant, (HAQ DI between-group difference -0.14 [95% CI -0.24, -0.03]; p=0.01); at 6 months not significant -0.12 (95% CI -0.23, 0.01); p=0.054).                                                                                                                                                                                                                                                                                                                                                                                                                                                                                                                                                                                                                                                                                                                                                                                                                                                                                                                                                                                                                                                                                                                                                                                                                                                                                                                                                                                                             | 2 patients reported fatigue during the supervised program, 1 patient reported hip pain after aerobic exercise, and 1 patient reported calf pain 5 days after the end of the supervised program. |
| Reis and Trevisani <sup>90</sup> ; 2014; study protocol, Brazil | SLE                                             | Aerobic exercise;<br>1) Improving Sleep                             | 1) Sleep efficiency will be evaluate with actigraph, the Pittsburgh Sleep Quality Index (PSQI) | n.a.                                                | n.a.                                                                           | n.a.                                                                                                                                                                                                                                                                                                                                                                                                                                                                                                                                                                                                                                                                                                                                                                                                                                                                                                                                                                                                                                                                                                                                                                                                                                                                                                                                                                                                                                                                                                                                                                                                                                                                                                    | n.a.                                                                                                                                                                                            |

| Study; Year; Design; Country                                                         | Population                                     | Intervention; Primary Outcome                                                                                                                           | Measurement                                                                          | n IG <sup>+</sup><br>Mean age<br>(±SD) <sup>o</sup>                                      | n CG <sup>+</sup><br>Mean age<br>(±SD) <sup>o</sup><br>Control<br>intervention   | Results                                                                                                                                                                                                                                                                                                                                                                                                                                                                                                                                                                                                                                                                                                                                                                                                                                                                                                                                                                            | Adverse effects                  |
|--------------------------------------------------------------------------------------|------------------------------------------------|---------------------------------------------------------------------------------------------------------------------------------------------------------|--------------------------------------------------------------------------------------|------------------------------------------------------------------------------------------|----------------------------------------------------------------------------------|------------------------------------------------------------------------------------------------------------------------------------------------------------------------------------------------------------------------------------------------------------------------------------------------------------------------------------------------------------------------------------------------------------------------------------------------------------------------------------------------------------------------------------------------------------------------------------------------------------------------------------------------------------------------------------------------------------------------------------------------------------------------------------------------------------------------------------------------------------------------------------------------------------------------------------------------------------------------------------|----------------------------------|
| Reis-Neto, et al. <sup>91</sup> ; 2013; quasi-experimental study; Brazil             | SLE<br>IG n=23<br>CG n=21                      | Supervised physical exercise; primary outcome was not specified,<br>1) Endothelial function<br>2) Ergospirometric test variables<br>3) Disease activity | 1) Flow-mediated dilation (FMD)<br>2) Ergospirometry<br>3) disease activity (SLEDAI) | n=23<br><br>Mean age = 35.3 (±6.8)                                                       | n=21<br><br>Mean age = 30.8 (±7.2)<br><br>No intervention.                       | 1) 16 weeks increase FMD IG [pre 6.3 (6.7)%, post 14.1 (9.1)%, p=0.006], no increase CG [pre 8.4 (8.2)%, post 9.4 (5.7)%, p=0.598]; between groups IG significant increase [pre 7.8 (8.8)%, post 1.1 (8.8)%, p=0.026].<br>2) ergospirometric test, IG improvement in exercise tolerance [pre 12.3 (2.4), post 13.4 (2.6) min, p=0.027], maximum speed [pre 7.7 (1.0), post 8.3 (1.2) km/h, p=0.027] and threshold speed [pre 5.6 (0.7), post 6.1 (0.9) km/h, p=0.005] no differences in CG. IG significant increase exercise tolerance to CG: [pre 1.1 (1.8), post -0.2 (1.6) min, p=0.026], maximum speed [pre 0.6 (1.0), post -0.1 (0.8) km/h, p=0.019] and VT1 speed [pre 0.5 (0.5), post -0.2 (0.6) km/h, p=0.002] compared with the CG at the end of 16 weeks. There<br>3) no difference in the SLEDAI score in both groups: IG [mean (S.D.) pre 2.0 (2.1), post 2.4 (2.3), p=0.196] or in the CG [pre 2.4 (2.3), post 3.1 (5.3), p=0.833], between groups at T16 (P = 0.652) | Not reported in the article.     |
| Rimmer, et al. <sup>92</sup> ; 2013; RCT; USA                                        | SLE<br>IG n=44<br>IG n=15<br>CG n=25<br>CG n=7 | Personalized Online Weight and Exercise Response System (POWERS);<br>1) Weight management                                                               | 1) Body weight, kg                                                                   | POWERS n=32<br>Mean age = 46.2 (±14.0)<br><br>POWERSplus n=27<br>Mean age = 44.3 (±12.8) | n=32<br>Mean age = 48.8 (±11.1)<br><br>Recommendation to exercise from physician | In this study, patients with different diseases were investigated. Since no subgroup analyses were presented in the article, the effectiveness findings refer to a mixed population, which makes a conclusion related to people with SLE only impossible.<br><br>Post-intervention differences in body weight were found between the groups. There was a significant group x time interaction (P G 0.01) in post-intervention body weight, with both the POWERS and POWERSplus groups demonstrating greater reduction in body weight compared with the control group (POWERS: -2.1 ± 5.5 kg, -2.4 ± -5.9%; POWERSplus: -0.5 ± 5.0 kg, -0.6 ± 4.3%; control: +2.6 ± 5.3 kg, 3.1 ± 7.4%).                                                                                                                                                                                                                                                                                            | No adverse events have occurred. |
| Sahebalzamani, et al. <sup>93</sup> ; 2016; one-group pretest–post test design; Iran | SLE<br>IC n=32<br>IG n=2                       | Continuous care model (CCM);<br>1) Knowledge Scores (patient's knowledge and patient's perception of family awareness and knowledge)                    | 1) Self-developed questionnaire                                                      | n=34<br>Mean age = 37.64 (±12.77)                                                        | n.a.                                                                             | Continuous care model significantly improved patients' knowledge level and their perceptions of their family members' awareness of their disease.<br>Patients' knowledge, mean (±SD): Pre-intervention 3.02 (±5.31), Post-intervention 26.85 (±14.18), mean difference (95% CI) 23.82 (18.84–28.80), ES 0.742, p<0.001<br>Families' awareness (Patients' perception), mean (±SD): Pre-intervention 15.91 (±7.04), Post-intervention 22.64 (±4.84), mean difference (95% CI) 6.73 (4.30–9.16), ES 0.492, p<0.001                                                                                                                                                                                                                                                                                                                                                                                                                                                                    | Not reported in the article.     |
| Samuelson and Ahlmén <sup>94</sup> ; 2003; series of                                 | SSc<br>IG n=6                                  | Patient education program;<br>1) Self-efficacy                                                                                                          | 1) Swedish version of the Arthritis Self-Efficacy Scale (ASES)                       | n=6<br>Mean age = 62 (range 47–74)                                                       | n.a.                                                                             | ASES: small number of study subjects did not permit a proper statistical analysis. The SEP of 3 patients with obvious pain at baseline was higher at the end of the course, indicating improvement. The SEF scores seemed stable. An increase in perceived self-efficacy to cope with                                                                                                                                                                                                                                                                                                                                                                                                                                                                                                                                                                                                                                                                                              | Not reported in the article.     |

| Study; Year; Design; Country                                         | Population                                                               | Intervention; Primary Outcome                                                                                                                                                                                                                           | Measurement                                                                                                                                                                                                                                                                                                                                                                                                                                                                                                                                                                                                                                                | n IG <sup>+</sup><br>Mean age<br>(±SD) <sup>g</sup> | n CG <sup>+</sup><br>Mean age<br>(±SD) <sup>g</sup><br>Control<br>intervention | Results                                                                                                                                                                                                                                                                                                                                                                                                                                                                                                                                                                                                                                                                      | Adverse effects                                                                                                              |
|----------------------------------------------------------------------|--------------------------------------------------------------------------|---------------------------------------------------------------------------------------------------------------------------------------------------------------------------------------------------------------------------------------------------------|------------------------------------------------------------------------------------------------------------------------------------------------------------------------------------------------------------------------------------------------------------------------------------------------------------------------------------------------------------------------------------------------------------------------------------------------------------------------------------------------------------------------------------------------------------------------------------------------------------------------------------------------------------|-----------------------------------------------------|--------------------------------------------------------------------------------|------------------------------------------------------------------------------------------------------------------------------------------------------------------------------------------------------------------------------------------------------------------------------------------------------------------------------------------------------------------------------------------------------------------------------------------------------------------------------------------------------------------------------------------------------------------------------------------------------------------------------------------------------------------------------|------------------------------------------------------------------------------------------------------------------------------|
| single-case studies; Sweden                                          |                                                                          |                                                                                                                                                                                                                                                         |                                                                                                                                                                                                                                                                                                                                                                                                                                                                                                                                                                                                                                                            |                                                     |                                                                                | physical and psychological symptoms of the disease, SEOS, was noted in 5 patients, while the sixth patient had excellent scores from the start.                                                                                                                                                                                                                                                                                                                                                                                                                                                                                                                              |                                                                                                                              |
| Sandqvist, et al. <sup>95</sup> ; 2004; RCT; Sweden                  | SSc<br>IG n=15<br>IG n=2<br>(CG was the other hand of the same subjects) | Paraffin bath in combination with hand exercises;<br>1) Function                                                                                                                                                                                        | 1) Range of motion (ROM; Extension deficits of digits II–V; volar abduction of the thumb; Finger flexion deficit of digits II–V)                                                                                                                                                                                                                                                                                                                                                                                                                                                                                                                           | n=17<br>Median age = 53<br>(range 30-66)            | n=17 (=the other hand of the same subjects)<br><br>Hand exercises only         | 1-month follow-up, finger flexion and extension, thumb abduction had improved in the paraffin-treated hand compared with the baseline values (p=0.05) independent of skin score and disease; a statistically significant change in the group as a whole was obtained for finger flexion only (p=0.046).<br>1) Finger flexion deficit (digits II–V, mm, median [range]): Baseline 30 (12.5 – 80); 1 month 22.5 (5 – 56.3); p<0.01<br>Finger extension deficit (digits II–V, mm, median [range]): Baseline 6.3 (0 – 35); 1 month 5 (0 – 31.3); p<0.01<br>Thumb abduction (mm, median [range]): Baseline 140 (100 – 165); 1 month 140 (105 – 170); p<0.05                       | Not reported in the article. Some patients had a worse outcome in some joints.                                               |
| Schouffoer, et al. <sup>96</sup> ; 2011; RCT; Netherlands            | SSc <sup>+</sup><br>IG n=19<br>CG n=21<br>IG n=9<br>CG n=4               | Multidisciplinary team care program; primary outcome was not specified.<br>1) Body function<br>2) Functional ability<br>3) Quality of Live                                                                                                              | 1) Hand Mobility in Scleroderma (HAMIS) test, Jamar dynamometer, maximal mouth opening (MMO), 6-minute walk distance (6MWD), maximum aerobic capacity (VO2max), Checklist Individual Strength 20 (CIS-20)<br>2) Health Assessment Questionnaire (HAQ)<br>3) Short Form Health Survey 36 (SF-36)                                                                                                                                                                                                                                                                                                                                                            | n=28<br>Mean age = 53.9 <sup>f</sup>                | n=25<br>Mean age = 51.7<br><br>Usual care                                      | IG at 12 weeks improvement in grip strength (2.2 versus -1.8 kg; p=0.001), MMO (1.4 versus -0.9 mm; p=0.011), 6MWD (42.8 versus 3.9 meters; p=0.021), and HAQ score (-0.18 versus 0.13; p=0.025) other outcome measures did not reach significance <b>12 weeks (mean change) IG:</b> improvement of grip strength (IG 2.2 [95% 0.6, 3.8], CG -1.8 [-3.4, -0.1], p=0.001), MMO (IG 1.4 [95% 0, 2.8], CG -0.9 [-2.1, 0.5], p=0.011), 6MWD (IG 42.8 [95% 22.1, 63.6], CG 3.9 [-20.8, 28.5], p=0.021), and the HAQ (IG -0.18 [95% -0.36, -0.01], CG 0.13 [-0.02, 0.27], p=0.025)<br><b>24 weeks (mean change) IG:</b> MMO (IG 1.4 [95% -0.3, 3.0], CG -0.4 [-1.5, 0.7], p=0.004) | IG 2 patients: progressively painful skin in 3 weeks; Achilles tendon rupture during the circuit training in the second week |
| Sheffield Hallam University <sup>97</sup> ; 2019, study protocol, UK | SSc                                                                      | Arm cranking, cycling;<br>1) Part I Mikrocirculation in the digital area<br>2) Part II (Feasibility study): Feasibility of a combined exercise protocol (aerobic with resistance training)<br>3) Part II (Feasibility study) Assessment of Quality time | 1. Microcirculation will be assessed via the combination of iontophoresis and laser doppler fluximetry in order to assess the microvascular reactivity pre and post the exercise intervention in the digital area.<br>2. The feasibility of the exercise protocol will be assessed via the acceptability of the exercise protocol which will be measured with certain questionnaires, individual experiences from the exercise sessions and compliance criteria<br>3. QoL with a modified version of EQ-5D-5L questionnaire, 6 minute-walking test will assess the functional capacity to perform daily activities and individual experiences (interviews) | n.a                                                 | n.a                                                                            | n.a                                                                                                                                                                                                                                                                                                                                                                                                                                                                                                                                                                                                                                                                          | n.a                                                                                                                          |

| Study; Year; Design; Country                                                 | Population                                                                                | Intervention; Primary Outcome                                                                                                                                        | Measurement                                                                                                                                                                                                                                                                                              | n IG <sup>±</sup><br>Mean age<br>(±SD) <sup>Ⓟ</sup> | n CG <sup>±</sup><br>Mean age<br>(±SD) <sup>Ⓟ</sup><br>Control<br>intervention | Results                                                                                                                                                                                                                                                                                                                                                                                                                                                                                                                                                                                                                                                                                                                                                 | Adverse effects                                         |
|------------------------------------------------------------------------------|-------------------------------------------------------------------------------------------|----------------------------------------------------------------------------------------------------------------------------------------------------------------------|----------------------------------------------------------------------------------------------------------------------------------------------------------------------------------------------------------------------------------------------------------------------------------------------------------|-----------------------------------------------------|--------------------------------------------------------------------------------|---------------------------------------------------------------------------------------------------------------------------------------------------------------------------------------------------------------------------------------------------------------------------------------------------------------------------------------------------------------------------------------------------------------------------------------------------------------------------------------------------------------------------------------------------------------------------------------------------------------------------------------------------------------------------------------------------------------------------------------------------------|---------------------------------------------------------|
| Sheikh, et al. <sup>98</sup> ; 2019; one-group pretest–post test design; USA | SLE<br>Ⓟ IG n=45<br>Ⓟ IG n=3                                                              | Walk with Ease (WWE); no primary outcome specified;<br>1) Pain<br>2) Stiffness<br>3) Fatigue                                                                         | 1) – 3) Visual Analogue Scale (VAS)<br>3) The Functional Assessment of Chronic Illness Therapy-Fatigue (FACIT-fatigue)                                                                                                                                                                                   | n=48<br>Mean age = 44.7<br>(±14.3)                  | n.a.                                                                           | At 6 weeks, 48 of the 75 recruited participants completed the WWE program. Participants experienced modest improvements in stiffness and fatigue (ES=0.12 and ES=0.23, respectively, for VAS scores; ES=0.16 for FACIT-fatigue score).<br>FACIT-fatigue: baseline 27.86 (29.34), follow up 32.81 (30.36), ES 0.16 (-0.24, 0.57)<br>VAS Fatigue: baseline 49.54 (71.03), follow up 33.35 (71.00), ES 0.23 (-0.19, 0.64)<br>VAS Pain: baseline 32.98 (54.85), follow up 29.28 (54.37), ES 0.07 (-0.34, 0.47)<br>VAS Stiffness: baseline 41.66 (67.12), follow up 33.52 (65.53), ES 0.12 (-0.28, 0.53)                                                                                                                                                     | Not reported. 27 patients were non-completers.          |
| Sohng <sup>99</sup> ; 2003; quasi-experimental study; South Korea            | SLE<br>Ⓟ IG n=21<br>Ⓟ CG n=20                                                             | Self-management course; primary outcome was not specified,<br>1) Fatigue<br>2) Coping skills<br>3) Self-efficacy<br>4) Depression<br>5) Pain<br>6) Disease activity. | 1) Multidimensional Assessment of Fatigue scale (MAF)<br>2) Numerical rating scales from 1 to 10 (NRS)<br>3) Numerical rating scales from 1 to 10 (NRS)<br>4) Beck Depression Inventory (BDI)<br>5) Visual analogue scale (VAS)<br>6) C3, C4, and anti-dsDNA antibody in mg/dL measured by nephelometry. | n=21<br>Mean age = 32.9 (±11.8)                     | n=20<br>Mean age = 32.3(±10.9)<br><br>No intervention.                         | 1) Fatigue: significant improvement in fatigue (p=0.049): IG decreased from 27.7 (±10.3) to 24.8 (±10.4) after the intervention, CG increased from 21.7 (±9.6) to 24.5 (±10.1)<br>2) Coping skills: significant improvement (p=0.007), IG pre-intervention 65.2 (±19.8) and 68.2 (±20.3) after the intervention; CG decreased from 71.7 (±16.1) to 68.6 (±16.3)<br>3) Self-efficacy (p=0.001), IG increase from 40.2 (±10.0) to 44.8 (±10.8); CG from 42.5 (±7.5) to 43.1 (±7.7)<br>4) Depression (p=0.025), IG decrease from 12.8 (±9.1) to 11.1 (±9.0); CG increased from 8.3 (±7.3) to 10.9 (±5.0)<br>5) Pain not significant (p=0.469), IG from 2.1 (±2.2) to 2.2 (±0.6), CG from 8.3 (±7.3) to 10.9 (±4.0)<br>6) Disease activity not significant. | Not reported in the article.                            |
| Tench, et al. <sup>100</sup> ; 2003; RCT; UK                                 | SLE<br>Ⓟ IG (EX) n=33<br>Ⓟ IG (RX) n=29<br>Ⓟ CG n=32<br>Mean age <sup>v</sup> = 39 (±0.8) | graded aerobic exercise programme (exercises [EX], relaxation [RX]);<br>1) Fatigue                                                                                   | 1) Self-rated clinical global impression change score, 7 levels                                                                                                                                                                                                                                          | (EX) n=33<br><br>(RX) n=29                          | n=32<br><br>No intervention                                                    | 16 of the 33 (49%) patients in the EX rated 'much' or 'very much' better compared to 8 of 29 (28%) in the RX and 5 of 32 (16%) in the CG (x <sup>2</sup> =8.3, df=2, P=0.02).                                                                                                                                                                                                                                                                                                                                                                                                                                                                                                                                                                           | No flare in disease activity, no serious adverse events |
| Thombs, et al. <sup>101</sup> , 2018; study protocol, Canada                 | SSc                                                                                       | SPIN-SSLED Program<br>1) Participant Feedback on Usability of Program Materials<br>2) Participant Feedback on Ease of Use of the Go-To                               | 1) Participants Interviews<br>2) Participants Interviews<br>3) Participants Interviews<br>4) Time logs<br>5) the number presented represents the total time required                                                                                                                                     | n.a                                                 | n.a                                                                            | n.a                                                                                                                                                                                                                                                                                                                                                                                                                                                                                                                                                                                                                                                                                                                                                     | n.a                                                     |

| Study; Year; Design; Country                                            | Population              | Intervention; Primary Outcome                                                                                                                                                                                                                                                                                                | Measurement                                                                                                                                                                                                                                                                                                                                                               | n IG <sup>±</sup><br>Mean age (±SD) <sup>o</sup> | n CG <sup>±</sup><br>Mean age (±SD) <sup>o</sup><br>Control<br>intervention | Results                                                                                                                                                                                                                                                                                                                                                                                                                                                                                                                                                                                                                                                                                                                                                                                                                                                                                                                                                                                                                                                                  | Adverse effects              |
|-------------------------------------------------------------------------|-------------------------|------------------------------------------------------------------------------------------------------------------------------------------------------------------------------------------------------------------------------------------------------------------------------------------------------------------------------|---------------------------------------------------------------------------------------------------------------------------------------------------------------------------------------------------------------------------------------------------------------------------------------------------------------------------------------------------------------------------|--------------------------------------------------|-----------------------------------------------------------------------------|--------------------------------------------------------------------------------------------------------------------------------------------------------------------------------------------------------------------------------------------------------------------------------------------------------------------------------------------------------------------------------------------------------------------------------------------------------------------------------------------------------------------------------------------------------------------------------------------------------------------------------------------------------------------------------------------------------------------------------------------------------------------------------------------------------------------------------------------------------------------------------------------------------------------------------------------------------------------------------------------------------------------------------------------------------------------------|------------------------------|
|                                                                         |                         | Videocon-ferencing Program<br>3) Participant Feedback on Ease of Use of the Online Forum<br>4) Personnel Requirements<br>5) Duration of Management of Online Training Group Participation<br>6) Percentage of Topics Adequately Covered in the Sessions<br>7) Number of Participants That Reported no Technological Problems | 6) observation of entire sessions for a randomly selected sample of 25% of video-recorded sessions. Adherence to session's goals and content using a checklist coding systems based on a standardized format.<br>7) Log of technological problems maintained and reported                                                                                                 |                                                  |                                                                             |                                                                                                                                                                                                                                                                                                                                                                                                                                                                                                                                                                                                                                                                                                                                                                                                                                                                                                                                                                                                                                                                          |                              |
| Timóteo, et al. <sup>102</sup> ; 2018; quasi-experimental study; Brazil | SLE<br>IG n=5<br>CG n=9 | Kinesiotherapy; primary outcome was not specified,<br>1) Functional capacity (posture, anthropometry, quality of life, strength, flexibility, walking and balance)<br>2) Quality of life<br>3) Serum levels of immune system markers                                                                                         | 1) Posture chart, height, body mass, skin folds, Tinetti gait and balance evaluation test, Sanny fleximeter, Wells test, 10 maximal repetitions test (10 RM)<br>2) Medical Outcomes Study 36 questionnaire (SF-36 short health survey form)<br>3) Blood collection and determination of cytokine levels, PI, and numbers of CD11b+ and CXCR2+ neutrophils and lymphocytes | n=5<br>Median age = 38.0 (IQR 30.0–41.5)         | n=9<br>Median age = 45.0 (IQR 31.5–52.0)<br>usual care                      | Increases of flexibility and strength, as well as a reduction in pain, kinesiotherapy did not influence immune parameters.<br>1)<br>Bench press (kg), median (IQR): CG pre 10.0 (7.0–12.0), post 12.0 (9.0–12.0), p=ns; IG pre 8.0 (7.5–8.0), post 20.0 (12.0–24.0), p=0.068<br>Leg extensions (kg), median (IQR): CG pre 20.0 (10.0–26.0), post 19.0 (11.5–24.0), p=ns; IG pre 11.0 (7.0–18.0), post 21.0 (19.0–33.0), p=0.062<br>Lying legs curls (kg), median (IQR): CG pre 7.0 (5.0–8.0), post 5.0 (4.0–9.0), p=ns; IG pre 3.0 (2.0–11.0), post 12.0 (11.0–14.0), p=0.062<br>Wells test (cm), median (IQR): CG pre 7.5 (5.0–22.5), post 10.0 (3.0–17.25), p=ns; IG pre 19.0 (2.5–20.0), post 27.0 (11.0–35.25), p<0.001<br>Right hamstring stretching test (degree) median (IQR): CG pre 75.0 (51.0–71.25), post 62.5 (57.5–71.25), p=ns; IG pre 65.0 (47.5–77.0), post 65.0 (47.5–77.0), p=ns<br>Left hamstring stretching test (degree), median (IQR): CG pre 67.5 (53.74–75.0), post 65.0 (52.0–75.0), p=ns; IG pre 80.0 (65.0–85.0), post 80.0 (65.0–86.0), p=ns | Not reported in the article. |

| Study; Year; Design; Country                                                                 | Population     | Intervention; Primary Outcome                                                                | Measurement   | n IG <sup>‡</sup><br>Mean age<br>(±SD) <sup>§</sup> | n CG <sup>‡</sup><br>Mean age<br>(±SD) <sup>§</sup><br>Control<br>intervention | Results                                                                                                                                                                                                                                                                                                                                                                                                                                                                                                                                                                                                                                                                                                                                                                                                                                                                                                                                                                                                                                                                                                                                                                                                                                                                                                                                                                                                                                                                                                                                                                                                                                                                                                                                                                                                                                                                                                                                                                                                                                                                                                                                                                                                                                                        | Adverse effects |
|----------------------------------------------------------------------------------------------|----------------|----------------------------------------------------------------------------------------------|---------------|-----------------------------------------------------|--------------------------------------------------------------------------------|----------------------------------------------------------------------------------------------------------------------------------------------------------------------------------------------------------------------------------------------------------------------------------------------------------------------------------------------------------------------------------------------------------------------------------------------------------------------------------------------------------------------------------------------------------------------------------------------------------------------------------------------------------------------------------------------------------------------------------------------------------------------------------------------------------------------------------------------------------------------------------------------------------------------------------------------------------------------------------------------------------------------------------------------------------------------------------------------------------------------------------------------------------------------------------------------------------------------------------------------------------------------------------------------------------------------------------------------------------------------------------------------------------------------------------------------------------------------------------------------------------------------------------------------------------------------------------------------------------------------------------------------------------------------------------------------------------------------------------------------------------------------------------------------------------------------------------------------------------------------------------------------------------------------------------------------------------------------------------------------------------------------------------------------------------------------------------------------------------------------------------------------------------------------------------------------------------------------------------------------------------------|-----------------|
|                                                                                              |                |                                                                                              |               |                                                     |                                                                                | <p>Pectoral strength test (degree), median (IQR): CG pre 30.0 (13.75–32.5), post 30.0 (17.40–40.0), p=ns; IG pre 20.0 (10.0–37.5), post 25.0 (17.5–40.0), p=ns</p> <p>2)</p> <p>Physical functioning, median (IQR): CG pre 65.0 (60.0–87.5), post 72.50 (48.75–92.5), p=ns; IG pre 70.00 (40.0–82.5), post 80.00 (49.0–90.0), p=ns</p> <p>Role physical, median (IQR): CG pre 100.0 (37.5–100.0), post 50.0 (12.5–87.5), p=ns; IG pre 25.0 (0.0–87.5), post 100.0 (50.0–100.0), p=ns</p> <p>Bodily pain, median (IQR): CG pre 61.0 (28.25–68.0), post 42.0 (20.5–73.0), p=ns; IG pre 52.0 (20.5–74.0), post 84.0 (59.0–100.0), p=0.02</p> <p>General health, median (IQR): CG pre 57.0 (39.5–92.0), post 65.0 (38.5–82.0), p=ns; IG pre 52.0 (30.0–68.5), post 65.0 (48.5–81.0), p=ns</p> <p>Vitality, median (IQR): CG pre 40.0 (30.0–50.0), post 40.0 (31.25–45.0), p=ns; IG pre 45.0 (17.5–82.0), post 60.0 (35.0–78.0), p=ns</p> <p>Social functioning, median (IQR): CG pre 62.5 (37.5–75.0), post 62.5 (43.75–75.0), p=ns; IG pre 50.0 (31.25–93.75), post 62.50 (18.75–100.0), p=ns</p> <p>Role emotional, median (IQR): CG pre 33.3 (0.0–100.0), post 66.6 (0.0–100.0), p=ns; IG pre 66.6 (0.0–100.0), post 100.0 (16.65–100.0), p=ns</p> <p>Mental health, median (IQR): CG pre 52.00 (34.0–70.0), post 48.0 (32.0–69.0), p=ns; IG pre 64.0 (38.0–84.0), post 72.0 (36.0–88.0), p=ns</p> <p>3)</p> <p>IL-2, median (IQR): CG pre 7.20 (6.75–8.95), post 0.0 (0.0–0.0), p=ns; IG pre 12.80 (5.60–21.45), post 0.0 (0.0–0.0), p=ns</p> <p>IL-5, median (IQR): CG pre 4.0 (2.50–10.50), post 0.0 (0.0–0.0), p=0.003; IG pre 5.10 (2.95–10.60), post 0.95 (0.21–1.92), p=ns</p> <p>IL-6, median (IQR): CG pre 6.90 (6.15–17.10), post 5.13 (2.47–6.07), p=0.007; IG pre 5.20 (2.60–7.35), post 1.30 (0.22–4.89), p=ns</p> <p>IL-8, median (IQR): CG pre 21.5 (11.95–46.5), post 10.20 (9.12–20.95), p=0.054; IG pre 21.10 (19.05–45.50), post 8.70 (7.13–179.9), p=ns</p> <p>IL-10, median (IQR): CG pre 16.10 (2.80–19.95), post 6.13 (3.22–9.50), p=0.034; IG pre 4.90 (0.0–14.85), post 4.86 (0.17–16.03), p=ns</p> <p>TNF-α, median (IQR): CG pre 1.70 (0.0–3.27), post 0.0 (0.0–2.02), p=ns; IG pre 0.93 (0.35–3.60), post 0.12 (0.0–2.63), p=ns</p> |                 |
| Twumasi, et al. <sup>103</sup> ; Twumasi, et al. <sup>104</sup> 2020; qualitative study; USA | SLE<br>IG n=24 | Chronic Disease Self-Management Program (CDSMP), primary outcome n.a.;<br>1) Self-management | 1) Interviews | n=24<br>Mean age = 48.6 (±13.5)                     | n.a.                                                                           | Study participants perceived the CDSMP to be a valuable resource that helped them improve self-management behaviors, including exercise, relaxation, diet, and medication adherence.                                                                                                                                                                                                                                                                                                                                                                                                                                                                                                                                                                                                                                                                                                                                                                                                                                                                                                                                                                                                                                                                                                                                                                                                                                                                                                                                                                                                                                                                                                                                                                                                                                                                                                                                                                                                                                                                                                                                                                                                                                                                           | Not reported    |



| Study; Year; Design; Country                                                                                                  | Population                | Intervention; Primary Outcome                                                                                                                     | Measurement                                                                                                                                                                                                                                                                                                                                                                                                                 | n IG <sup>‡</sup><br>Mean age<br>(±SD) <sup>¶</sup>                                                                            | n CG <sup>‡</sup><br>Mean age<br>(±SD) <sup>¶</sup><br>Control<br>intervention | Results                                                                                                                                                                                                                                                                                                                                                                                                                                                                                                                                                                                                                                                                                                                                                                                         | Adverse effects              |
|-------------------------------------------------------------------------------------------------------------------------------|---------------------------|---------------------------------------------------------------------------------------------------------------------------------------------------|-----------------------------------------------------------------------------------------------------------------------------------------------------------------------------------------------------------------------------------------------------------------------------------------------------------------------------------------------------------------------------------------------------------------------------|--------------------------------------------------------------------------------------------------------------------------------|--------------------------------------------------------------------------------|-------------------------------------------------------------------------------------------------------------------------------------------------------------------------------------------------------------------------------------------------------------------------------------------------------------------------------------------------------------------------------------------------------------------------------------------------------------------------------------------------------------------------------------------------------------------------------------------------------------------------------------------------------------------------------------------------------------------------------------------------------------------------------------------------|------------------------------|
| Uras, et al.<br><sup>105</sup> ; 2019;<br>RCT; Italy                                                                          | SSc<br>IG n=32<br>CG n=31 | Educational materials and a specific “face-to-face” interventions<br>1) Mouth opening                                                             | 1) Mouth opening, cm                                                                                                                                                                                                                                                                                                                                                                                                        | n=32<br>Mean age = 54.6<br>(±15.8)                                                                                             | n=31<br>Mean age = 55.2 (±13.3)<br>Educational materials alone                 | Compared to baseline, IC mouth opening increased of 0.31 cm (95% confidence interval: 0.13–0.49), p=0.003; control group, the increase was 0.13 cm (95% confidence interval: 0.01–0.25), p=0.06; between the two groups was not statistically significant (p=0.10 [intention-to-treat analysis]; however, reached statistical significance in the per-protocol analysis (39 patients, p=0.02).<br>Experimental group - mouth opening, cm (mean [±SD]): baseline 3.69 (±0.65), 12 months follow up 4.00 (±0.76), mean difference (95% CI) 0.31 (0.13–0.49) p=0.003, difference (95% CI) to control group 0.18 (–0.03 to –0.39) p=0.10<br>Control group - mouth opening, cm (mean [±SD]): baseline 3.48 (0.60), 12 months follow up 3.61 (0.65), mean difference (95% CI) 0.13 (0.01–0.25) p=0.06 | Not reported                 |
| Vitali, et al.<br><sup>106</sup> ; 2019;<br>single case study; Italy                                                          | SSc<br>IG n=4             | Oral exercises;<br>1) Oral Motor functions                                                                                                        | 1) Maximal mouth opening (MMO) (distance between the incisal edge of the upper and lower first incisors); tongue protrusion (Tprot) (distance between the position of tongue at rest and maximum Tprot. subjects were asked to push the rod connected to the strain gauge dial as far as possible by the tongue); tongue strength (Tstren) (force exerted by the tongue); lip strength (Lstren) (force exerted by the lips) | n=4<br>Mean age = 56.5<br>(±14.6)                                                                                              | n.a.                                                                           | The mean phase differences between assessment and treatment phases across subjects were from 0.88 to 9.56 mm in MMO, from 2.03 to 12.3 mm in Tprot, from –0.12 to 5.35 N in Tstren, and from –0.84 to 5.19 N in Lstren; 3 subjects crossed the 5th percentile discriminating normal from abnormal performances for both Tstren and Tprot, while this occurred in 2 subjects for MMO and Lstren.                                                                                                                                                                                                                                                                                                                                                                                                 | Not reported                 |
| Williams, et al.<br><sup>107</sup> ;<br>Williams, et al.<br><sup>108</sup> ; 2019;<br>one-group pretest–post test design; USA | SLE<br>IG n=20            | Peer Approaches to Lupus Self-management (PALS); no primary outcome specified;<br>1) Quality of Life<br>2) Self-management<br>3) Disease activity | 1) Lupus quality of life questionnaire (LUP-QOL)<br>2) Patient Activation Measure<br>3) Systemic Lupus Activity Questionnaire (SLAQ), immunologic evidence as Th1/Th2 cytokine balance                                                                                                                                                                                                                                      | n=20<br>Mean age not reported                                                                                                  | n.a.                                                                           | statistically significant decreases in patient-reported disease activity and improved trends in patient activation or patient engagement in their disease and management. Other numbers not reported.<br><br>Disease activity (SLAQ): baseline mean (95% CI) 28.2 (13.83–42.57), post-intervention (95% CI) 6.25 (5.20–7.30), p=0.004                                                                                                                                                                                                                                                                                                                                                                                                                                                           | Not reported                 |
| Williams, et al.<br><sup>109</sup> ; 2017;<br>one-group pretest–post test design; USA                                         | SLE<br>IG n=23            | Peer Approaches to Lupus Self-Management (PALS) project; primary outcome was not specified,<br>1) PROs (self-management, Quality of Life, disease | 1) Interviews; Patient Activation Measure (PAM); Lupus Quality of Life (LUP-QOL) questionnaire; Systemic Lupus Activity Questionnaire (SLAQ); along with standardized measures of stress (PSS), anxiety (GAD-7), and depression (PHQ-9).<br>2) Peripheral blood                                                                                                                                                             | 23<br>Mean age 35+<br>Age <25 n=2(8.7%), 25–34 n=2(8.7%), 35–44 n=8(34.8%), 45–54 n=5(21.7%), 55–64 n=1(4.4%), >65 n=5(21.7%); | n.a.                                                                           | Strongest correlations were between the Generalized Anxiety Disorder measure and Th1/Th2 cytokine balance. Weaker correlations existed between depression and the Th1/Th2 cytokine balance. Significant improvements in depression and anxiety and these variables were also significantly associated with improved cytokine balance.                                                                                                                                                                                                                                                                                                                                                                                                                                                           | Not reported in the article. |

| Study; Year; Design; Country                                        | Population                                    | Intervention; Primary Outcome                                                                                                                                                                                                   | Measurement                                                                                                                                                                                                                                                                      | n IG <sup>±</sup><br>Mean age<br>(±SD) <sup>o</sup> | n CG <sup>±</sup><br>Mean age<br>(±SD) <sup>o</sup><br>Control<br>intervention | Results                                                                                                                                                                                                                                                                                                                                                                                                                                                                                                                                                                                                                                                                                                                                                                                                                  | Adverse effects              |
|---------------------------------------------------------------------|-----------------------------------------------|---------------------------------------------------------------------------------------------------------------------------------------------------------------------------------------------------------------------------------|----------------------------------------------------------------------------------------------------------------------------------------------------------------------------------------------------------------------------------------------------------------------------------|-----------------------------------------------------|--------------------------------------------------------------------------------|--------------------------------------------------------------------------------------------------------------------------------------------------------------------------------------------------------------------------------------------------------------------------------------------------------------------------------------------------------------------------------------------------------------------------------------------------------------------------------------------------------------------------------------------------------------------------------------------------------------------------------------------------------------------------------------------------------------------------------------------------------------------------------------------------------------------------|------------------------------|
|                                                                     |                                               | activity, stress, anxiety, depression)<br>2) Th1/ Th2 balance                                                                                                                                                                   |                                                                                                                                                                                                                                                                                  | mean age more than 35 years                         |                                                                                |                                                                                                                                                                                                                                                                                                                                                                                                                                                                                                                                                                                                                                                                                                                                                                                                                          |                              |
| Williams, et al. <sup>110</sup> ; 2016; study protocol; USA         | SLE Protocol, not inclusions                  | Improve quality of life for African-American lupus patients (IQAN);<br>1) Self-management (health behaviors, health status, health care utilization, biological markers)                                                        | 1) The Arthritis Self-Efficacy Scale (ASES), the Personal Health Questionnaire Depression Scale (PHQ-9), the Lupus Quality of Life Questionnaire (LUP-QOL), the Systemic Lupus Activity Questionnaire (SLAQ), and the Stanford Patient Education Research Center Questionnaires. | n.a.                                                | n.a.                                                                           | n.a.                                                                                                                                                                                                                                                                                                                                                                                                                                                                                                                                                                                                                                                                                                                                                                                                                     | n.a.                         |
| Wolff, et al. <sup>111</sup> ; 2014; description of an intervention | SSc Not experimental                          | SMART framework for long term management of chronic hand conditions; confidence and the ability to self-management                                                                                                              | n.a.                                                                                                                                                                                                                                                                             | n.a.                                                | n.a.                                                                           | n.a.                                                                                                                                                                                                                                                                                                                                                                                                                                                                                                                                                                                                                                                                                                                                                                                                                     | n.a.                         |
| Wu, et al. <sup>112</sup> ; 2019; RCT; Taiwan                       | SLE<br>IG n=38<br>CG n=38                     | Physical activity counselling (The 5 A's model to improve physical activity in patients with SLE); no primary outcome specified;<br>1) Physical activity<br>2) Disease activity<br>3) Quality of Life<br>4) Fatigue<br>5) Sleep | 1) Agoss Health Pedometer<br>2) Systemic Lupus Erythematosus Disease Activity Index-2000 (SLEDAI-2K)<br>3) 36-item Short Form Health Survey (SF-36)<br>4) Fatigue Severity Scale (FSS)<br>5) Pittsburgh Sleep Quality Index (PSQI)                                               | n=38<br>Mean age = 43.76 (±9.92)                    | n=38<br>Mean age = 43.45 (±12.70)<br>Usual care                                | Daily steps, quality of sleep, and vitality were significantly improved in the intervention group compared with the control group (at week 8 and 12), mental health at week 8.<br>1) Physical activity: baseline IG 5820 (±2430) steps, CG 5942 (2659); post intervention IG increased 1309 steps per day, CG 286; p<0.001<br>2) Disease activity: not reported<br>3) Quality of Life: Significant improvements in vitality at the eighth week (B = 7.20, P = .01) and 12th week (B = 9.15, P < .01) and mental health at the eighth week (B = 4.34, P < .05). No significant differences in other domains.<br>4) Fatigue: not significant (B = -0.18, P = .47 and B = -0.14, P = 0.64)<br>5) Sleep: significant improvement from baseline to the eighth week and 12th week (B = -1.08, P < .01 and B = -1.24, P < 0.01) | Not reported                 |
| Xie, et al. <sup>113</sup> ; 2018; RCT; China                       | SLE<br>IG n=57<br>IG n=7<br>CG n=54<br>CG n=7 | Transitional care (Omaha System); no primary outcome specified<br>1) Self-care<br>2) Quality of life                                                                                                                            | 1) Exercise of Self-Care Agency Scale (ESCA)<br>2) Medical Outcomes Study Short Form 36-item Health Survey (SF-36)                                                                                                                                                               | n=64<br>Mean age = 35.9 (±12.3)                     | n=61<br>Mean age = 38.4 (±15.8)<br>Usual care                                  | IG greater improvement in self-care and quality of life.<br>Self-care agency, total score, mean (SD): CG pre 95.7 (9.6); CG post 100.9 (8.5); IG pre 92.9 (10.8); IG post 112.9 (6.8); p<0.001<br>Quality of life, SF-36 PCS, mean (SD): CG pre 50.0 (11.9); CG post 60.5 (12.3); IG pre 48.8 (12.4); IG post 63.7 (10.9); P=0.046<br>Quality of life, SF-36 MCS, mean (SD): CG pre 49.8 (13.1); CG post 57.4 (9.3); IG pre 45.4 (14.3); IG post 61.1 (9.1); P=0.001                                                                                                                                                                                                                                                                                                                                                     | Not reported in the article. |

| Study; Year; Design; Country                                                                            | Population                                      | Intervention; Primary Outcome                                                                                 | Measurement                                                                                                                                | n IG <sup>+</sup><br>Mean age<br>(±SD) <sup>o</sup> | n CG <sup>+</sup><br>Mean age<br>(±SD) <sup>o</sup><br>Control<br>intervention                         | Results                                                                                                                                                                                                                                                                                                                                                                                                                                                                                                                                                                                                                                                                  | Adverse effects                  |
|---------------------------------------------------------------------------------------------------------|-------------------------------------------------|---------------------------------------------------------------------------------------------------------------|--------------------------------------------------------------------------------------------------------------------------------------------|-----------------------------------------------------|--------------------------------------------------------------------------------------------------------|--------------------------------------------------------------------------------------------------------------------------------------------------------------------------------------------------------------------------------------------------------------------------------------------------------------------------------------------------------------------------------------------------------------------------------------------------------------------------------------------------------------------------------------------------------------------------------------------------------------------------------------------------------------------------|----------------------------------|
| Yelnik, et al.<br><sup>114</sup> ; 2016;<br>uncontrolled,<br>longitudinal<br>experimental<br>study; USA | SLE<br>IG n=108<br>IG n=13                      | Cardiovascular<br>disease (CVD)<br>prevention<br>counselling program;<br>1) Prevalence of CVD<br>risk factors | 1) blood pressure, blood glucose, cholesterol<br>profile, bodymass index (BMI), smoking,<br>lifestyle habits (diet and physical activity). | n=121<br><br>Mean age = 41.4<br>(±13.7)             | n.a.                                                                                                   | Blood pressure no significant changes: odds ratio (OR) 1.00 (0.98–1.02); blood glucose no significant changes, percentage of patients with abnormal blood glucose significantly increased over time: OR 1.11 (1.08–1.15); cholesterol profile only mean HDL improved, Abnormal lipid profile (%) 0.99 (0.97–1.01), significant improvement in the number of patients with abnormal cholesterol profile (OR 0.90, 95% CI 0.92–0.96); BMI no significant changes: OR 1.03 (0.98–1.08); Smoking no significant changes: OR 0.94 (0.86–10.2); poor diet habits increased significantly: OR 0.94 (0.93–0.96); physical activity significantly decreased: OR 0.94 (0.92–0.96). | Not reported in the article.     |
| Young, et al.<br><sup>115</sup> ; 2002;<br>survey; UK                                                   | SLE<br>IG n=510<br>IG n=36                      | LupusHelp;<br>1) Patient<br>information                                                                       | 1) Knowledge questionnaires                                                                                                                | n=510<br>age range: 15-70                           | n.a.                                                                                                   | 510 participants completed an online questionnaire that showed that for some users it was their first use of the internet to gather lupus information, but the majority (58.9%) accessed it at least monthly for this purpose. We also found that, while most users (56.9%) found current disease information was at an appropriate level, 37.5% thought it was too basic. Knowledge questionnaires from 42 participants before and after using the site showed a significant rise in users' knowledge of the areas covered by the site.                                                                                                                                 | n.a.                             |
| Yuen, et al.<br><sup>116</sup> ; 2011;<br>one-group<br>pretest–post<br>test design;<br>USA              | SLE<br>IG n=15                                  | Home-based exercise<br>program;<br>1) Fatigue                                                                 | 1) Fatigue Severity Scale (FSS)                                                                                                            | n=15<br><br>Mean age = 46.7<br>(±14.4)              | n.a.                                                                                                   | There was a significant reduction in fatigue at the post 10-week Wii Fit exercise assessment (FSS baseline [53.9±7.2]; T1 [44.0±11.2]; p=0.002).                                                                                                                                                                                                                                                                                                                                                                                                                                                                                                                         | No adverse events have occurred. |
| Yuen, et al.<br><sup>117</sup> ; 2011;<br>RCT; USA                                                      | SSc<br>IG n=21<br>IG n=5<br>CG n=17<br>CG n=5   | home orofacial<br>exercise program;<br>1) Size of oral<br>aperture                                            | 1) Change in the maximum oral aperture<br>from baseline to the 3- and 6-months post                                                        | 26<br>Mean age = 51.9<br>(±14.3)                    | 22<br>Mean age =<br>49.2 (±11.4)<br><br>Usual care                                                     | Significantly increase in oral aperture for participants received the orofacial exercise program was found when compared to those in the usual care at 3 months, but not at 6-months evaluation. Baseline-T1 (overall change; mean, ±SD; p-value): IG (1.44 ±2.83; within-group p=0.02); CG (-0.09 ±3.16; within-group p=0.71); between group p=0.04<br>Baseline-T2 (overall change; mean, ±SD; p-value): IG (2.14 ±2.88; within-group p=0.001); CG (2.26 ±4.28; within-group p=0.02); between group p=0.19                                                                                                                                                              | Not reported in the article.     |
| Yuen, et al.<br><sup>118</sup> ; 2011;<br>RCT; USA                                                      | SSc<br>(same<br>patients as<br><sup>117</sup> ) | Adaptive oral hygiene<br>devices and orofacial<br>home-exercise;<br>1) Improve gingival<br>health             | 1) Löe-Silness gingival index (GI)                                                                                                         | (same patients<br>as <sup>117</sup> )               | (same patients<br>as <sup>117</sup> )<br><br>Manual<br>toothbrush<br>(Oral-B®<br>Complete<br>Advantage | Change in the mean gingival index (GI) scores (whole mouth) 0–3 Months Entire Sample (IG 0.05, p<0.05; CG 0.14, p<0.05; Difference -0.09), Subgroups with Oral Aperture < 40 mm (IG 0.08, p<0.05; CG 0.08, p<0.05; Difference 0.00)<br>0–6 Months Entire Sample (IG 0.12, p<0.05; CG 0.06, p<0.025; Difference 0.07, p<0.025), Subgroups with Oral Aperture < 40 mm (IG 0.16, p<0.05; CG -0.02; Difference 0.18, p<0.025)                                                                                                                                                                                                                                                | Not reported in the article.     |

| Study; Year; Design; Country                                           | Population                                                               | Intervention; Primary Outcome                          | Measurement                                                                                    | n IG <sup>‡</sup><br>Mean age<br>(±SD) <sup>Ⓔ</sup> | n CG <sup>‡</sup><br>Mean age<br>(±SD) <sup>Ⓔ</sup><br>Control<br>intervention | Results                                                                                                                                                                                                                                                                                                                                                                                                                                                                                                                | Adverse effects              |
|------------------------------------------------------------------------|--------------------------------------------------------------------------|--------------------------------------------------------|------------------------------------------------------------------------------------------------|-----------------------------------------------------|--------------------------------------------------------------------------------|------------------------------------------------------------------------------------------------------------------------------------------------------------------------------------------------------------------------------------------------------------------------------------------------------------------------------------------------------------------------------------------------------------------------------------------------------------------------------------------------------------------------|------------------------------|
|                                                                        |                                                                          |                                                        |                                                                                                |                                                     | Deep Clean toothbrush) and dental floss (Crest® glide shred guard floss)       | Both groups showed significant reduction in GI scores at 6 months (P<0.005). Reduction in GI scores of the intervention group at 6 months was 20.8% which is considered to be clinically significant. Compared to the control group, the intervention group showed a significant and larger reduction in GI score by 8% at 6 months (P=0.0007).                                                                                                                                                                        |                              |
| Zanatta, et al. <sup>119</sup> ; 2017; quasi-experimental study; Italy | SSc<br>♂ IG n=10<br>♀ CG n=10<br><br>Mean age <sup>Ⓜ</sup> = 50.8 (±9.6) | Occupational therapy;<br>1) Activities of daily living | 1) Health assessment questionnaire (HAQ);<br>Evaluation of Daily Activity Questionnaire (EDAQ) | n=10                                                | n=10<br><br>Information meeting                                                | T0-T1 comparison: lower HAQ score, though this was not statistically significant, the total score of the EDAQ significantly decreased (p<0.05). Comparing the two groups of women, both the HAQ and the EDAQ scores significantly improved in the occupational therapy group (p<0.05).<br>HAQ mean±SD (IG T0 [14.9±11.3]; T1 [11.8±7.1]; CG T0 [13.3±13.1]; T1 [13.9±13.5]; between groups p<0.05)<br>EDAQ total mean±SD (CG T0 [66.7±42.9]; T1 [50.3±33.5]; CG T0 [72.4±73.0]; T1 [71.5±72.3]; between groups p<0.05) | Not reported in the article. |

<sup>Ⓔ</sup>SD = Standard deviation

<sup>Ⓕ</sup>SD not reported

<sup>Ⓖ</sup>RCT = Randomised Controlled Trial

<sup>Ⓗ</sup>SSc = Systemic Sclerosis

<sup>Ⓕ</sup>SLE = Systemic Lupus Erythematosus

♂ = male

♀ = female

<sup>‡</sup>IG and CG = Intervention-group and Control-group

<sup>Ⓐ</sup>No effect-sizes in the study reported

<sup>Ⓓ</sup>Gender distribution per group not reported

<sup>Ⓜ</sup>n.s. = not significant

<sup>††</sup>SF-36 v2 Health Survey (Mental component summary, Physical component summary)

<sup>Ⓒ</sup>ES=Effect size Cohen's d

<sup>Ⓜ</sup>mean age was only reported for all patients

① Both groups were intervention groups. Comparison between two different interventions.

② Number of SLE patients not reported

## References

- Alexanderson H, Bergegård J, Björnådal L, et al. Intensive aerobic and muscle endurance exercise in patients with systemic sclerosis: a pilot study. *BMC research notes* 2014;7(1):86.
- Allaire SH, Niu J, LaValley MP. Employment and satisfaction outcomes from a job retention intervention delivered to persons with chronic diseases. *Rehabilitation Counseling Bulletin* 2005;48(2):100-09.

3. Antonioli CM, Bua G, Frigè A, et al. An individualized rehabilitation program in patients with systemic sclerosis may improve quality of life and hand mobility. *Clinical rheumatology* 2009;28(2):159-65.
4. Attia MW. Evidence-Based Physical Therapy Practice for Patients with Scleroderma. Florida Gulf Coast University, 2014.
5. Austin JS, Maisiak RS, Macrina DM, et al. Health outcome improvements in patients with systemic lupus erythematosus using two telephone counseling interventions. *Arthritis & Rheumatism: Official Journal of the American College of Rheumatology* 1996;9(5):391-99.
6. Avaux M, Hoellinger P, Nieuwland-Husson S, et al. Effects of two different exercise programs on chronic fatigue in lupus patients. *Acta Clinica Belgica* 2016;71(6):403-06.
7. Ball TM. Structural integration-based fascial release efficacy in systemic lupus erythematosus (SLE): two case studies. *Journal of bodywork and movement therapies* 2011;15(2):217-25.
8. Benatti FB, Miossi R, Passarelli M, et al. The effects of exercise on lipid profile in systemic lupus erythematosus and healthy individuals: a randomized trial. *Rheumatology international* 2015;35(1):61-69.
9. Berdal G, Ingvild Bø, Dager TN, et al. Structured Goal Planning and Supportive Telephone Follow-up in Rheumatology Care: Results From a Pragmatic, Stepped-Wedge, Cluster-Randomized Trial. *Arthritis Care and Research* 2018;70(11):1576-86. doi: 10.1002/acr.23520
10. Bogdanovic G, Stojanovich L, Djokovic A, et al. Physical activity program is helpful for improving quality of life in patients with systemic lupus erythematosus. *The Tohoku journal of experimental medicine* 2015;237(3):193-99.
11. Boström C, Elfving B, Dupre B, et al. Effects of a one-year physical activity programme for women with systemic lupus erythematosus—a randomized controlled study. *Lupus* 2016;25(6):602-16.
12. Braden CJ, McGlone K, Pennington F. Specific psychosocial and behavioral outcomes from the systemic lupus erythematosus self-help course. *Health Education Quarterly* 1993;20(1):29-41.
13. Broadbent S, Crowley-McHattan Z, Zhou S, et al. The effect of the Nintendo Wii Fit on exercise capacity and gait in an elderly woman with CREST syndrome. *International Journal of Therapy and Rehabilitation* 2014;21(11):539-46.
14. Brown S. Management of digital ulcers related to systemic sclerosis. *Nursing Standard (through 2013)* 2010;24(32):53.
15. Brown RT, Shaftman SR, Tilley BC, et al. The health education for lupus study: a randomized controlled cognitive-behavioral intervention targeting psychosocial adjustment and quality of life in adolescent females with systemic lupus erythematosus. *The American journal of the medical sciences* 2012;344(4):274-82.
16. Carrera BG, Vargas-Hitos JA, Morillas-De-Laguno P, et al. Might A 12-week aerobic exercise intervention improve patient-reported outcomes in women with systemic lupus erythematosus? *Annals of the Rheumatic Diseases* 2019;78:798. doi: 10.1136/annrheumdis-2019-eular.6789
17. Soriano-Maldonado A, Morillas-de-Laguno P, Sabio JM, et al. Effects of 12-week aerobic exercise on arterial stiffness, inflammation, and cardiorespiratory fitness in women with systemic LUPUS erythematosus: non-randomized controlled trial. *Journal of clinical medicine* 2018;7(12):477.
18. Carrier ME, Kwakkenbos L, Boutron I, et al. Randomized feasibility trial of the Scleroderma patient-centered intervention network hand exercise program (SPIN-HAND): Study protocol. *Journal of Scleroderma and Related Disorders* 2018;3(1):91-97. doi: 10.5301/jsrd.5000263
19. Carrier ME, Kwakkenbos L, Nielson WR, et al. The Scleroderma Patient-Centered Intervention Network Self-Management Program: Protocol for a Randomized Feasibility Trial. *JMIR Res Protoc* 2020;9(4):e16799. doi: 10.2196/16799 [published Online First: 2020/04/25]

20. Carvalho MRPd, Sato EI, Tebexreni AS, et al. Effects of supervised cardiovascular training program on exercise tolerance, aerobic capacity, and quality of life in patients with systemic lupus erythematosus. *Arthritis Care & Research: Official Journal of the American College of Rheumatology* 2005;53(6):838-44.
21. Clarke-Jenssen AC, Fredriksen PM, Lilleby V, et al. Effects of supervised aerobic exercise in patients with systemic lupus erythematosus: a pilot study. *Arthritis Care & Research: Official Journal of the American College of Rheumatology* 2005;53(2):308-12.
22. Cunningham N, Moorman E, Fussner L, et al. Development of the treatment and education approach for childhood-onset lupus (TEACH) intervention for adolescents and young adults. *Pediatric Rheumatology* 2018;16 doi: 10.1186/s12969-018-0252-y
23. Cunningham NR, Fussner LM, Moorman E, et al. Development and pilot testing of the treatment and education approach for childhood-onset lupus (TEACH): a cognitive behavioral treatment. *Pediatric Rheumatology* 2019;17(1):9.
24. Daltroy L, Robb-Nicholson C, Iversen M, et al. Effectiveness of minimally supervised home aerobic training in patients with systemic rheumatic disease. *Rheumatology* 1995;34(11):1064-69.
25. Dobkin PL, Da Costa D, Joseph L, et al. Counterbalancing patient demands with evidence: results from a pan-Canadian randomized clinical trial of brief supportive-expressive group psychotherapy for women with systemic lupus erythematosus. *Annals of Behavioral Medicine* 2002;24(2):88-99.
26. Doerfler B, Allen TS, Southwood C, et al. Medical nutrition therapy for patients with advanced systemic sclerosis (MNT PASS): a pilot intervention study. *Journal of Parenteral and Enteral Nutrition* 2017;41(4):678-84.
27. Drenkard C, Easley K, Bao G, et al. Overcoming barriers to recruitment and retention of African-American women with SLE in behavioural interventions: lessons learnt from the WELL study. *Lupus Sci Med* 2020;7(1) doi: 10.1136/lupus-2020-000391 [published Online First: 2020/06/14]
28. Drenkard C, Dunlop-Thomas C, Easley K, et al. Benefits of a self-management program in low-income African-American women with systemic lupus erythematosus: results of a pilot test. *Lupus* 2012;21(14):1586-93.
29. Edworthy SM, Dobkin PL, Clarke AE, et al. Group psychotherapy reduces illness intrusiveness in systemic lupus erythematosus. *The Journal of rheumatology* 2003;30(5):1011-16.
30. Everett ST, Wolf R, Contento I, et al. Short-term patient-centered nutrition counseling impacts weight and nutrient intake in patients with systemic lupus erythematosus. *Lupus* 2015;24(12):1321-26.
31. Filippetti M, Cazzoletti L, Zamboni F, et al. Effect of a tailored home-based exercise program in patients with systemic sclerosis: a randomized controlled trial. *Scandinavian Journal of Medicine & Science in Sports* 2020 Apr 29:Epub ahead of print 2020
32. Freedman RR, Ianni P, Wenig P. Behavioral treatment of Raynaud's phenomenon in scleroderma. *Journal of behavioral medicine* 1984;7(4):343-53.
33. Greco CM. Reducing Depressive Symptoms in Systemic Lupus Erythematosus [ClinicalTrials.gov identifier: NCT01120652]: ClinicalTrials.gov; 2015 [access year 2020].
34. Greco CM, Rudy TE, Manzi S. Effects of a stress-reduction program on psychological function, pain, and physical function of systemic lupus erythematosus patients: A randomized controlled trial. *Arthritis Care & Research* 2004;51(4):625-34.
35. Gregory WJ, Wilkinson J, Herrick AL. A randomised controlled trial of wax baths as an additive therapy to hand exercises in patients with systemic sclerosis. *Physiotherapy* 2019;105(3):370-77. doi: 10.1016/j.physio.2018.08.008
36. Harrison M, Morris K, Horton R, et al. Results of intervention for lupus patients with self-perceived cognitive difficulties. *Neurology* 2005;65(8):1325-27.

37. Haupt M, Millen S, Jänner M, et al. Improvement of coping abilities in patients with systemic lupus erythematosus: a prospective study. *Annals of the rheumatic diseases* 2005;64(11):1618-23.
38. Herschman J, Kasenberg T, Levy D, et al. Development of a smartphone app for adolescents with lupus: a collaborative meeting-based methodology inclusive of a wide range of stakeholders. *Revista Panamericana de Salud Pública* 2014;35:471-76.
39. Horton R, Peterson MG, Powell S, et al. Users evaluate lupusline a telephone peer counseling service. *Arthritis & Rheumatism: Official Journal of the American College of Rheumatology* 1997;10(4):257-63.
40. Horváth J, Bálint Z, Szép E, et al. Efficacy of intensive hand physical therapy in patients with systemic sclerosis. *Clin Exp Rheumatol* 2017;35(Suppl 106):159-66.
41. Kankaya H, Karadakovan A. Effects of web-based education and counselling for patients with systemic lupus erythematosus: self-efficacy, fatigue and assessment of care. *Lupus* 2020;29(8):884-91. doi: 10.1177/0961203320928423 [published Online First: 2020/06/02]
42. Karlson EW, Liang MH, Eaton H, et al. A randomized clinical trial of a psychoeducational intervention to improve outcomes in systemic lupus erythematosus. *Arthritis & Rheumatism: Official Journal of the American College of Rheumatology* 2004;50(6):1832-41.
43. Keramiotou K, Anagnostou C, Kataxaki E, et al. The impact of upper limb exercise on function, daily activities and quality of life in systemic lupus erythematosus: A pilot randomised controlled trial. *RMD Open* 2020;6(1) doi: 10.1136/rmdopen-2019-001141
44. Khanna D. Taking Charge of Systemic Sclerosis (TOSS) [ClinicalTrials.gov identifier: NCT02494401] 2019 [
45. Khanna D, Serrano J, Berrocal VJ, et al. Randomized Controlled Trial to Evaluate an Internet-Based Self-Management Program in Systemic Sclerosis. *Arthritis Care & Research* 2019;71(3):435-47. doi: 10.1002/acr.23595
46. Kristensen LQ, Oestergaard LG, Bovbjerg K, et al. Use of paraffin instead of lukewarm water prior to hand exercises had no additional effect on hand mobility in patients with systemic sclerosis: a randomized clinical trial. *Hand Therapy* 2019 Mar;24(1):13-21 2019
47. Kusnanto K, Sari NPWP, Harmayetty H, et al. Self-care model application to improve self-care agency, self-care activities, and quality of life in patients with systemic lupus erythematosus. *Journal of Taibah University medical sciences* 2018;13(5):472-78.
48. Kwakkenbos L, Willems LM, van den Hoogen FH, et al. Cognitive-behavioural therapy targeting fear of progression in an interdisciplinary care program: a case study in systemic sclerosis. *Journal of clinical psychology in medical settings* 2014;21(4):297-312.
49. Kwakkenbos L, Bluysen S, Vonk M, et al. Addressing patient health care demands in systemic sclerosis: pre-post assessment of a psycho-educational group programme. *Clinical and Experimental Rheumatology-Incl Supplements* 2011;29(2):S60.
50. Landim SF, Bertolo MB, Marcatto de Abreu MF, et al. The evaluation of a home-based program for hands in patients with systemic sclerosis. *Journal of Hand Therapy* 2019;32(3):313-21. doi: 10.1016/j.jht.2017.10.013
51. Landim S, Bertolo M, Del Rio AP, et al. Sustained efficacy of a concise self-management programme for hands in systemic sclerosis: a longitudinal case-control observational study. *Rheumatology* 2020
52. Li LC, Feehan LM, Xie H, et al. Efficacy of a physical activity counselling program with use of wearable tracker in people with inflammatory arthritis: a randomized controlled trial [with consumer summary]. *Arthritis Care & Research* 2020 Apr 5:Epub ahead of print 2020
53. Maddali-Bongi S, Del Rosso A, Passalacqua M, et al. Manual lymph drainage improving upper extremity edema and hand function in patients with systemic sclerosis in edematous phase. *Arthritis care & research* 2011;63(8):1134-41.

54. Maddali-Bongi S, Del Rosso A, Galluccio F, et al. Efficacy of connective tissue massage and Mc Menell joint manipulation in the rehabilitative treatment of the hands in systemic sclerosis. *Clinical rheumatology* 2009;28(10):1167-73.
55. Maddali-Bongi S, Del Rosso A, Galluccio F, et al. Efficacy of a tailored rehabilitation program for systemic sclerosis. *Clinical & Experimental Rheumatology* 2009;27(3):S44.
56. Maddali-Bongi S, Landi G, Galluccio F, et al. The rehabilitation of facial involvement in systemic sclerosis: efficacy of the combination of connective tissue massage, Kabat's technique and kinesitherapy: a randomized controlled trial. *Rheumatology international* 2011;31(7):895-901.
57. Maisiak R, Austin J, West S, et al. The effect of person-centered counseling on the psychological status of persons with systemic lupus erythematosus or rheumatoid arthritis. A randomized, controlled trial. *Arthritis & Rheumatism: Official Journal of the American College of Rheumatology* 1996;9(1):60-66.
58. Mancuso T, Poole JL. The effect of paraffin and exercise on hand function in persons with scleroderma: a series of single case studies. *Journal of Hand Therapy* 2009;22(1):71-78.
59. Martin MM. Effects of the myofascial release in diffuse systemic sclerosis. *Journal of bodywork and movement therapies* 2009;13(4):320-27.
60. McNearney TA, Sallam HS, Hunnicutt SE, et al. Prolonged treatment with transcutaneous electrical nerve stimulation (TENS) modulates neuro-gastric motility and plasma levels of vasoactive intestinal peptide (VIP), motilin and interleukin-6 (IL-6) in systemic sclerosis. *Clin Exp Rheumatol* 2013;31(2 suppl 76):140-50.
61. Miljeteig K, Graue M. Evaluation of a multidisciplinary patient education program for people with systemic lupus erythematosus. *Journal of Nursing and Healthcare of Chronic Illness* 2009;1(1):87-95.
62. Mitropoulos A, Gumber A, Akil M, et al. Exploring the microcirculatory effects of an exercise programme including aerobic and resistance training in people with limited cutaneous systemic sclerosis. *Microvasc Res* 2019;125:103887. doi: 10.1016/j.mvr.2019.103887 [published Online First: 2019/06/21]
63. Mitropoulos A, Gumber A, Crank H, et al. Exploring the feasibility of an exercise programme including aerobic and resistance training in people with limited cutaneous systemic sclerosis [with consumer summary]. *Clinical Rheumatology* 2020 Jun;39(6):1889-1898 2020
64. Mitropoulos A, Gumber A, Crank H, et al. The effects of upper and lower limb exercise on the microvascular reactivity in limited cutaneous systemic sclerosis patients. *Arthritis research & therapy* 2018;20(1):112.
65. Mouthon L, Thombs BD. Scleroderma Patient-centered Intervention Network (SPIN) Hand Program (SPIN-HAND) [ClinicalTrials.gov identifier: NCT03419208]: ClinicalTrials.gov; 2020 [access year 2020].
66. Mugii N, Hasegawa M, Matsushita T, et al. The efficacy of self-administered stretching for finger joint motion in Japanese patients with systemic sclerosis. *The Journal of rheumatology* 2006;33(8):1586-92.
67. Mugii N, Matsushita T, Oohata S, et al. Long-term follow-up of finger passive range of motion in Japanese systemic sclerosis patients treated with self-administered stretching. *Modern rheumatology* 2019;29(3):484-90.
68. Murphy S. Rehabilitation for Arm Coordination and Hand Movement in Systemic Sclerosis (REACH) [ClinicalTrials.gov identifier: NCT03482219]: ClinicalTrials.gov; 2019 [access year 2020].
69. Murphy SL, Barber MW, Homer K, et al. Occupational therapy treatment to improve upper extremity function in individuals with early systemic sclerosis: a pilot study. *Arthritis care & research* 2018;70(11):1653-60.



70. Navarrete-Navarrete N, Peralta-Ramírez M, Sabio-Sánchez J, et al. Efficacy of cognitive behavioural therapy for the treatment of chronic stress in patients with lupus erythematosus: a randomized controlled trial. *Psychotherapy and psychosomatics* 2010;79(2):107-15.
71. Naylor WP. Oral management of the scleroderma patient. *The Journal of the American Dental Association* 1982;105(5):814-17.
72. Naylor WP, Douglass CW, Mix E. The nonsurgical treatment of microstomia in scleroderma: a pilot study. *Oral surgery, oral medicine, oral pathology* 1984;57(5):508-11.
73. Neville C, Da Costa D, Rochon M, et al. Development of the Lupus interactive navigator as an empowering web-based eHealth tool to facilitate Lupus management: users perspectives on usability and acceptability. *JMIR research protocols* 2016;5(2):e44.
74. Ng P, Chan W. Group psychosocial program for enhancing psychological well-being of people with systemic lupus erythematosus. *Journal of Social Work in Disability & Rehabilitation* 2007;6(3):75-87.
75. O'Riordan R, Doran M, Connolly D. Fatigue and activity management education for individuals with systemic lupus erythematosus. *Occupational therapy international* 2017;2017
76. O'Connor S, Durand M-J, Hudson M, et al. Effects of osteopathic manipulative treatment on hand function, disease symptoms and functional status in systemic sclerosis: a series of single-case studies in working women. *International Journal of Osteopathic Medicine* 2016;22:21-32.
77. Oliveira N, dos Santos Sabbag L, de Sa Pinto A, et al. Aerobic exercise is safe and effective in systemic sclerosis. *International journal of sports medicine* 2009;30(10):728-32.
78. Parisi S, Celletti C, Scarati M, et al. Neuromuscular taping enhances hand function in patients with systemic sclerosis: a pilot study. *La Clinica Terapeutica* 2017;168(6):e371-e75.
79. Perandini LA, Sales-de-Oliveira D, Mello SB, et al. Exercise training can attenuate the inflammatory milieu in women with systemic lupus erythematosus. *Journal of Applied Physiology* 2014;117(6):639-47.
80. Piga M, Tradori I, Pani D, et al. Telemedicine applied to kinesiotherapy for hand dysfunction in patients with systemic sclerosis and rheumatoid arthritis: recovery of movement and telemonitoring technology. *The Journal of rheumatology* 2014;41(7):1324-33.
81. Pinto AL, Oliveira NC, Gualano B, et al. Efficacy and safety of concurrent training in systemic sclerosis. *The Journal of Strength & Conditioning Research* 2011;25(5):1423-28.
82. Pizzo G, Scardina G, Messina P. Effects of a nonsurgical exercise program on the decreased mouth opening in patients with systemic scleroderma. *Clinical oral investigations* 2003;7(3):175-78.
83. Poole JL, Skipper B, Mendelson C. Evaluation of a mail-delivered, print-format, self-management program for persons with systemic sclerosis. *Clinical rheumatology* 2013;32(9):1393-98.
84. Poole JL, Mendelson C, Skipper B, et al. Taking charge of systemic sclerosis: A pilot study to assess the effectiveness of an internet self-management program. *Arthritis care & research* 2014;66(5):778-82.
85. Poole J, Conte C, Brewer C, et al. Oral hygiene in scleroderma: the effectiveness of a multi-disciplinary intervention program. *Disability and rehabilitation* 2010;32(5):379-84.
86. Prado DM, Benatti FB, de Sá-Pinto AL, et al. Exercise training in childhood-onset systemic lupus erythematosus: a controlled randomized trial. *Arthritis research & therapy* 2013;15(2):R46.

87. Prado DM, Gualano B, Pinto A, et al. Exercise in a child with systemic lupus erythematosus and antiphospholipid syndrome. *Medicine and science in sports and exercise* 2011;43(12):2221-23.
88. Ramsey-Goldman R, Schilling EM, Dunlop D, et al. A pilot study on the effects of exercise in patients with systemic lupus erythematosus. *Arthritis Care & Research* 2000;13(5):262-69.
89. Rannou F, Boutron I, Mouthon L, et al. Personalized physical therapy versus usual care for patients with systemic sclerosis: a randomized controlled trial. *Arthritis care & research* 2017;69(7):1050-59.
90. Reis LK, Trevisani VF. Aerobic Exercise on Improving Sleep in Systemic Lupus Erythematosus. (EFEXO) [ClinicalTrials.gov identifier: NCT02037971]: ClinicalTrials.gov; 2014 [access year 2020].
91. Reis-Neto ETd, Silva AEd, Monteiro CMdC, et al. Supervised physical exercise improves endothelial function in patients with systemic lupus erythematosus. *Rheumatology* 2013;52(12):2187-95.
92. Rimmer JH, Wang E, Pellegrini CA, et al. Telehealth weight management intervention for adults with physical disabilities: a randomized controlled trial. *American journal of physical medicine & rehabilitation* 2013;92(12):1084-94.
93. Sahebalzamani M, Farahani H, Tabatabaee Jamarani M, et al. Effects of a Continuous Care Model on Patients' Knowledge and Health-Related Quality of Life in Systemic Lupus Erythematosus. *Rehabilitation Nursing* 2016
94. Samuelson UK, Ahlmén EM. Development and evaluation of a patient education program for persons with systemic sclerosis (scleroderma). *Arthritis Care & Research* 2000;13(3):141-48.
95. Sandqvist G, Åkesson A, Eklund M. Evaluation of paraffin bath treatment in patients with systemic sclerosis. *Disability and rehabilitation* 2004;26(16):981-87.
96. Schouffoer A, Ninaber M, Beart-van de Voorde L, et al. Randomized comparison of a multidisciplinary team care program with usual care in patients with systemic sclerosis. *Arthritis care & research* 2011;63(6):909-17.
97. Sheffield Hallam University. The Effects of Exercise in Patients With Systemic Sclerosis [ClinicalTrials.gov identifier: NCT03058887]: ClinicalTrials.gov; 2019 [access year 2020].
98. Sheikh SZ, Kaufman K, Gordon BB, et al. Evaluation of the self-directed format of Walk With Ease in patients with systemic lupus erythematosus: the Walk-SLE Pilot Study. *Lupus* 2019;28(6):764-70. doi: 10.1177/0961203319846387 [published Online First: 2019/05/02]
99. Sohng KY. Effects of a self-management course for patients with systemic lupus erythematosus. *Journal of Advanced Nursing* 2003;42(5):479-86.
100. Tench C, McCarthy J, McCurdie I, et al. Fatigue in systemic lupus erythematosus: a randomized controlled trial of exercise. *Rheumatology* 2003;42(9):1050-54.
101. Thombs BD, Dyas L, Pepin M, et al. Scleroderma Patient-centered Intervention Network-Scleroderma Support group Leader EDucation (SPIN-SSLED) program: non-randomised feasibility trial. *BMJ open* 2019;9(11):e029935. doi: 10.1136/bmjopen-2019-029935 [published Online First: 2019/11/14]
102. Timóteo RP, Silva AF, Micheli DC, et al. Increased flexibility, pain reduction and unaltered levels of IL-10 and CD11b+ lymphocytes in patients with systemic lupus erythematosus were associated with kinesiotherapy. *Lupus* 2018;27(7):1159-68.
103. Twumasi AA, Shao A, Dunlop-Thomas C, et al. Exploring the Perceived Impact of the Chronic Disease Self-Management Program on Self-Management Behaviors among African American Women with Lupus: A Qualitative Study. *ACR Open Rheumatology* 2020;2(3):147-57. doi: 10.1002/acr2.11117

104. Twumasi AA, Shao A, Dunlop-Thomas C, et al. Health service utilization among African American women living with systemic lupus erythematosus: perceived impacts of a self-management intervention. *Arthritis Res Ther* 2019;21(1):155. doi: 10.1186/s13075-019-1942-7 [published Online First: 2019/06/27]
105. Uras C, Mastroeni S, Tabolli S, et al. A comparison between two educational methods in the rehabilitation of the microstomia in systemic sclerosis: A randomized controlled trial. *Clinical Rehabilitation* 2019;33(11):1747-56.
106. Vitali C, Baldanzi C, Crispiatico V, et al. Effect of Impairment-Oriented and Function-Oriented Exercises on Mouth Function in Subjects with Systemic Sclerosis. *Folia Phoniater Logop* 2019;1-13. doi: 10.1159/000502643 [published Online First: 2019/09/25]
107. Williams EM, Dismuke CL, Faith TD, et al. Cost-effectiveness of a peer mentoring intervention to improve disease self-management practices and self-efficacy among African American women with systemic lupus erythematosus: analysis of the Peer Approaches to Lupus Self-management (PALS) pilot study. *Lupus* 2019;28(8):937-44. doi: 10.1177/0961203319851559
108. Williams EM, Egede L, Oates JC, et al. Peer approaches to self-management (PALS): comparing a peer mentoring approach for disease self-management in African American women with lupus with a social support control: study protocol for a randomized controlled trial. *Trials* 2019;20(1):N.PAG-N.PAG. doi: 10.1186/s13063-019-3580-4
109. Williams EM, Hyer JM, Viswanathan R, et al. Cytokine balance and behavioral intervention; findings from the Peer Approaches to Lupus Self-Management (PALS) project. *Human immunology* 2017;78(9):574-81.
110. Williams EM, Lorig K, Glover S, et al. Intervention to Improve Quality of life for African-American lupus patients (IQAN): study protocol for a randomized controlled trial of a unique a la carte intervention approach to self-management of lupus in African Americans. *BMC health services research* 2016;16(1):339.
111. Wolff A, Weinstock-Zlotnick G, Gordon J. SSc management—In person appointments and remote therapy (SMART): A framework for management of chronic hand conditions. *Journal of Hand Therapy* 2014;27(2):143-51.
112. Wu ML, Tsai JC, Yu KH, et al. Effects of physical activity counselling in women with systemic lupus erythematosus: A randomized controlled trial. *International Journal of Nursing Practice (John Wiley & Sons, Inc)* 2019;25(5):N.PAG-N.PAG. doi: 10.1111/ijn.12770
113. Xie X, Song Y, Yang H, et al. Effects of transitional care on self-care, readmission rates, and quality of life in adult patients with systemic lupus erythematosus: a randomized controlled trial. *Arthritis research & therapy* 2018;20(1):184.
114. Yelnik CM, Richey M, Haiduc V, et al. Cardiovascular disease prevention counseling program for systemic lupus erythematosus patients. *Arthritis care & research* 2017;69(8):1209-16.
115. Young S, Henderson E, Cheseldine D, et al. Development and assessment of a World Wide Web site for systemic lupus erythematosus patient information. *Lupus* 2002;11(8):478-84.
116. Yuen HK, Holthaus K, Kamen DL, et al. Using Wii Fit to reduce fatigue among African American women with systemic lupus erythematosus: a pilot study. *Lupus* 2011;20(12):1293-99.
117. Yuen HK, Marlow NM, Reed SG, et al. Effect of orofacial exercises on oral aperture in adults with systemic sclerosis. *Disability and rehabilitation* 2012;34(1):84-89.

118. Yuen HK, Weng Y, Bandyopadhyay D, et al. Effect of a multi-faceted intervention on gingival health among adults with systemic sclerosis. *Clinical and experimental rheumatology* 2011;29(2 Suppl 65):S26.
119. Zanatta E, Rodeghiero F, Pigatto E, et al. Long-term improvement in activities of daily living in women with systemic sclerosis attending occupational therapy. *British Journal of Occupational Therapy* 2017;80(7):417-22.
