# Supplementary material for: Suitability for e-health of non-pharmacological interventions in connective tissue diseases: scoping review with a descriptive analysis
Source: HighWire-hosted journal article supplement (doi:10.1136/rmdopen-2021-001710), 2021-07-01
Supplement: rmdopen-2021-001710supp005_data_supplement.pdf [file rmdopen-2021-001710supp005_data_supplement.pdf]

**Supplement 5.** Interventions described using the TIDieR checklist<sup>1</sup>. The interventions are described as they were reported in the studies.

| Authors, Year, Diagnoses                       | Item 1: Brief name                                               | Item 2: Why                                    | Item 3, 4, 6, 7, 8, 10:<br>What (materials, procedures)<br>How<br>Where<br>How much<br>Modification                                                                                                                                                                                                                                                                                                                                                                                                                                                                                                                                                                                                                                                                                                                                                                                                                                                                                                                                                                                                                                                                                                                                                                                                                                                                                                                                                                                                                                                                                                                                                                                                                                                                                                                                                                | Item 5: Who (provided) | Item 9: Tailoring                           | Item 11, 12:<br>How well (planned, actual)                                                                                                                |
|------------------------------------------------|------------------------------------------------------------------|------------------------------------------------|--------------------------------------------------------------------------------------------------------------------------------------------------------------------------------------------------------------------------------------------------------------------------------------------------------------------------------------------------------------------------------------------------------------------------------------------------------------------------------------------------------------------------------------------------------------------------------------------------------------------------------------------------------------------------------------------------------------------------------------------------------------------------------------------------------------------------------------------------------------------------------------------------------------------------------------------------------------------------------------------------------------------------------------------------------------------------------------------------------------------------------------------------------------------------------------------------------------------------------------------------------------------------------------------------------------------------------------------------------------------------------------------------------------------------------------------------------------------------------------------------------------------------------------------------------------------------------------------------------------------------------------------------------------------------------------------------------------------------------------------------------------------------------------------------------------------------------------------------------------------|------------------------|---------------------------------------------|-----------------------------------------------------------------------------------------------------------------------------------------------------------|
| Alexanderson , et al. <sup>2</sup> ; 2014; SSC | Intensive aerobic exercise and muscle endurance training program | Improvement in the six minute walk test (6MWT) | <p>Aerobic exercise on a stationary bike and muscular endurance training of the shoulder flexors and the hip flexors; exercised three times a week under supervision</p> <p>aerobic exercise: 10-minute warm-up biking session at an intensity corresponding to perceived light exertion (10 on the Borg RPE, 6–20 scale), afterward, the load increased to 15 on the Borg RPE scale for 15 minutes; last five minutes loads were reduced to light exertion; first week, only the 10-minute warmup exercise; following week 5 minutes were added with an intensity corresponding to somewhat exerting (13 on the Borg RPE scale); remaining six weeks, goal intensity corresponding to perceived heavy exertion (15 on the Borg RPE scale) for a maximum of 30 minutes.</p> <p>After biking exercises repetitive dynamic muscle resistance training: As many shoulder flexion repetitions as possible in a sitting position without back support with a 1-kg weight cuff around the wrist, and in hip flexion, lifting one leg at a time while lying in a supine position. The numbers of repetitions were based on the results of the FI-2 tests for these muscle groups. If participants at some point during the exercise period performed the maximal number of repetitions (60) of shoulder flexion, a heavier cuff was attached to the wrist to increase the load. In case of performing maximal repetitions of hip flexion, a weight cuff of 0.5 – 1.0 kg was attached to the ankle. Every other week, the numbers of repetitions were adapted according to the results of every other week systematic assessments. During the first two weeks, patients performed only 50% of the maximal number of repetitions performed at the 0-week assessment and then gradually increased to perform the maximal number of repetitions at each exercise session.</p> | Physiotherapist        | Exercise adapted to the patient's condition | To enhance compliance, participants were given the choice to exercise at home or at a gym twice a week and once a week under supervision at the hospital. |

| Authors,<br>Year,<br>Diagnoses    | Item 1: Brief name                    | Item 2: Why                                                                                                | Item 3, 4, 6, 7, 8, 10:<br>What (materials, procedures)<br>How<br>Where<br>How much<br>Modification                                                                                                                                                                                                                                                                                                                                                                                                                                                                                                                                                                                                                                                                                                                                                                                                                                                                                                                                                                                                                                                                                                                                                                                                           | Item 5: Who<br>(provided)               | Item 9: Tailoring                                                          | Item 11, 12:<br>How well<br>(planned,<br>actual)                               |
|-----------------------------------|---------------------------------------|------------------------------------------------------------------------------------------------------------|---------------------------------------------------------------------------------------------------------------------------------------------------------------------------------------------------------------------------------------------------------------------------------------------------------------------------------------------------------------------------------------------------------------------------------------------------------------------------------------------------------------------------------------------------------------------------------------------------------------------------------------------------------------------------------------------------------------------------------------------------------------------------------------------------------------------------------------------------------------------------------------------------------------------------------------------------------------------------------------------------------------------------------------------------------------------------------------------------------------------------------------------------------------------------------------------------------------------------------------------------------------------------------------------------------------|-----------------------------------------|----------------------------------------------------------------------------|--------------------------------------------------------------------------------|
| Allaire, et al.<br>3; 2005; SLE   | Job retention intervention            | Prevent job loss                                                                                           | <p>Job retention intervention based on Roessler and Rumrill's theory about the relationship between workplace barriers and job satisfaction</p> <p>Setting: 2 Meetings, lasting 1.5 hours; additional time was available if desired.</p> <p>Content: (a) identification of work barriers and solutions, (b) vocational counseling and guidance, and (c) education and self-advocacy.</p> <p>a) Identified barriers were prioritized, the counselor suggested potential solutions and discussed their feasibility with participants, plan of action was developed</p> <p>b) Counselors conveyed positive messages about a participant's ability to work, individual's long-term job-person match was evaluated in light of the impact of his or her rheumatic disease; possible job alternatives, requirements, and relevant resources were identified so the individual could begin the process of changing job or career.</p> <p>c) Counselors provided information about disability-related employment legal rights and responsibilities, also conducted a skill training exercise to increase ability to request a job accommodation in an appropriate manner; copies of pamphlets and flyers about how to manage health-related employment problems and available resources were given and discussed.</p> | Rehabilitation counselors               | Tailored to the needs of the patient.                                      | No information.                                                                |
| Antonioli, et al.<br>4; 2009; SSc | Individualized rehabilitation program | To increase functioning, quality of life, impaired health and perceived QOL in airways disease, skin score | <p>Ten individual sessions of 30 min, each session included warm-up and cool-down exercises, training of motor functions, and respiratory exercises (diaphragmatic breathing and controlled coughing).</p> <p>Lower extremity exercises: combination of treadmill and free-walking</p> <p>Upper-extremity exercises: combination of finger-stretching and occupational therapy</p> <p>In addition, if needed: physical therapy for patients with particular problems, transcutaneous electrical nerve stimulation, magnetic fields therapy, laser therapy, radar therapy, extracorporeal shock waves, and ultrasound immersion therapy.</p>                                                                                                                                                                                                                                                                                                                                                                                                                                                                                                                                                                                                                                                                   | Occupational therapist, physiotherapist | Individual program, individual sessions, changes in intervention if needed | At each visit, they were asked for compliance with the home-treatment program. |

| Authors, Year, Diagnoses                | Item 1: Brief name                                                                                                                      | Item 2: Why                                                                   | Item 3, 4, 6, 7, 8, 10:<br>What (materials, procedures)<br>How<br>Where<br>How much<br>Modification                                                                                                                                                                                                                                                                                                                                                                                                                                                                                          | Item 5: Who (provided)                             | Item 9: Tailoring                                                                                                                        | Item 11, 12:<br>How well (planned, actual)                            |
|-----------------------------------------|-----------------------------------------------------------------------------------------------------------------------------------------|-------------------------------------------------------------------------------|----------------------------------------------------------------------------------------------------------------------------------------------------------------------------------------------------------------------------------------------------------------------------------------------------------------------------------------------------------------------------------------------------------------------------------------------------------------------------------------------------------------------------------------------------------------------------------------------|----------------------------------------------------|------------------------------------------------------------------------------------------------------------------------------------------|-----------------------------------------------------------------------|
| Attia <sup>5</sup> , 2014, SSc          | Physiotherapy                                                                                                                           | Improve cervical dysfunction                                                  | At-home exercise on days when the program was terminated.<br>3 times per week for one month<br>Active Range of Motion Activities. Aerobic Conditioning: Upper Body Ergometer. Client Education. Home Exercise Program. Joint Mobilization Techniques. Manual Therapy Techniques.<br>Modalities: As Needed. Neuromuscular Re-education. Self-Care/Home Management. Soft Tissue Mobilization Techniques. Stretching/Flexibility Activities. Therapeutic Exercise.                                                                                                                              | Physiotherapist                                    | Interventions during the course of treatment will be directed toward addressing the problems and achieving the goals previously outlined | No information.                                                       |
| Austin, et al. <sup>6</sup> ; 1996; SLE | Telephone intervention strategies; treatment counseling (TC); symptom monitoring (SM); both interventions were expected to be effective | Improve health outcomes (fatigue, physical dysfunction, psychological affect) | TC: targeted 6 patient behaviors: selfcare activities in managing fatigue, patient's communication skills, removing barriers to medical care, medication self-management, symptom monitoring, and stress control methods; intervention consisted of coaching strategies to empower the patient for proper physician-patient-communication, and to achieve desired goals. SM: question and answer format emphasizing a review of function that consisted of fatigue, physical function, self-care activities, social activity, support from family, flare-ups, joint pain, mood, and tension. | Trained counsellor (TC), trained staff member (SM) | Individual coaching and counselling (TC)                                                                                                 | Medication adherence was discussed (TC group).                        |
| Avaux, et al. <sup>7</sup> ; 2016; SLE  | Supervised training (ST) compared to home training (HT)                                                                                 | Improve fatigue                                                               | Patients were asked to exercise 3 h per week during 12 weeks. The training consisted of (i): Endurance exercises (walking or bicycle) with the aim of achieving between 60 and 80% of the theoretical maximal heart rate; and (ii): Strengthening exercises (with elastoband or weights for both upper and lower limbs); at the beginning multidisciplinary information session about the benefits of exercise in SLE, during which practical information was also delivered; two groups differed by the level of supervision (ST under supervision; HT exercised at home on their own).     | Multidisciplinary team                             | The intensity of the exercise sessions was set individually at the HR of the patient.                                                    | Compliance was similar and low ( $\pm 50\%$ ) in both exercise groups |

| Authors, Year, Diagnoses                 | Item 1: Brief name                                            | Item 2: Why                                                                                                                                                    | Item 3, 4, 6, 7, 8, 10:<br>What (materials, procedures)<br>How<br>Where<br>How much<br>Modification                                                                                                                                                                                                                                                                                                                                                                                                                                                                                                                                                                                                                                                                                          | Item 5: Who (provided)                                                                | Item 9: Tailoring                         | Item 11, 12:<br>How well (planned, actual) |
|------------------------------------------|---------------------------------------------------------------|----------------------------------------------------------------------------------------------------------------------------------------------------------------|----------------------------------------------------------------------------------------------------------------------------------------------------------------------------------------------------------------------------------------------------------------------------------------------------------------------------------------------------------------------------------------------------------------------------------------------------------------------------------------------------------------------------------------------------------------------------------------------------------------------------------------------------------------------------------------------------------------------------------------------------------------------------------------------|---------------------------------------------------------------------------------------|-------------------------------------------|--------------------------------------------|
| Ball <sup>8</sup> ; 2010; SLE            | Fascial Release Therapy (FRT) and structural integration (SI) | 1) Reducing pain, stiffness, fatigue, anxiety.<br>2) Enhancing functional mobility, autonomy, quality of life, emotional state, autonomic and immune function. | FRT and SI Aim: Through manual manipulation and movement re-education, they aim to restore 'tensegrity' - integrity of length, symmetry, balance, and equal tension in all planes between the fascial 'guy ropes' pulling, and hence applying compressive forces on, the skeletal structure, about its vertical axis.<br>Setting: Session duration was 1 h except for the initial consultation (75 min), and timings were determined by best clinical judgment in correlation with mutual availability.<br>Case 1: eight treatments were provided over a fourteen-week span.<br>Case 2: four treatments in seven weeks, plus three treatments in five weeks some two months later due to patient's interim overseas trip.                                                                    | Physiotherapist                                                                       | Tailored to the needs of the patient.     | No information.                            |
| Benatti, et al. <sup>9</sup> ; 2014; SLE | Exercise training program                                     | Improve lipid profile; composition of high-density lipoprotein (HDL) HDL2 and HDL3                                                                             | Twice a week; consisted of seven strength exercises for the major muscle groups (4 sets of 8–12 repetitions maximum for each exercise). Following 30 min of aerobic exercise on a treadmill at the corresponding heart rate between the ventilatory anaerobic threshold (VAT) and 10 % below the respiratory compensation point (RCP).                                                                                                                                                                                                                                                                                                                                                                                                                                                       | No information.                                                                       | At the corresponding heart rate.          | No information.                            |
| Berdal, et al. <sup>10</sup> ; 2018; SLE | Structured Goal Planning and Supportive Telephone Follow-up   | Improve health-related quality of life (HRQoL)                                                                                                                 | The add-on program comprised a self-management booklet, motivational interviewing in structured individualized goal planning, and 4 supportive follow-up phone calls after discharge. It comprised 4 components: 1) a self-management booklet based on cognitive behavioural theory, 2) two semi structured goal-setting conversations in which patient-specific rehabilitation goals were developed by individual patients and health care professionals on admission and discharge, 3) telephone follow-up after discharge to support patients in their efforts to reach their goals, and 4) motivational interviewing systematically employed by the health professionals throughout the goalsetting procedures and the follow-up phone calls. More details are displayed in the article. | Health care professionals (physician, physiotherapist, occupational therapist, nurse) | Individually tailored to patient's needs. | Adherence was measured with checklists.    |

| Authors, Year, Diagnoses                     | Item 1: Brief name                            | Item 2: Why                                                           | Item 3, 4, 6, 7, 8, 10:<br>What (materials, procedures)<br>How<br>Where<br>How much<br>Modification                                                                                                                                                                                                                                                                                                                                                                                                                                                                                                                                                                                    | Item 5: Who (provided)                                                                              | Item 9: Tailoring                                              | Item 11, 12:<br>How well (planned, actual)                                                                                         |
|----------------------------------------------|-----------------------------------------------|-----------------------------------------------------------------------|----------------------------------------------------------------------------------------------------------------------------------------------------------------------------------------------------------------------------------------------------------------------------------------------------------------------------------------------------------------------------------------------------------------------------------------------------------------------------------------------------------------------------------------------------------------------------------------------------------------------------------------------------------------------------------------|-----------------------------------------------------------------------------------------------------|----------------------------------------------------------------|------------------------------------------------------------------------------------------------------------------------------------|
| Bogdanovic, et al. <sup>11</sup> ; 2015; SLE | Different types of physical activity          | Improve quality of life                                               | Aerobic training: on a bicycle ergometer for 15 minutes, 3 times a week for 6 weeks.<br>Isotonic exercises: for 30 minutes, 3 times a week for 6 weeks.<br>Muscle strength and flexibility were combined with a focus on concentration, balance, breathing and relaxation. Training has the objective of building up strength in the entire body with an emphasis on the abdominal and the back muscles.                                                                                                                                                                                                                                                                               | No information.                                                                                     | No tailoring.                                                  | No information.                                                                                                                    |
| Boström, et al. <sup>12</sup> ; 2016; SLE    | Physical activity programme                   | To increase the aerobic capacity                                      | The programme was organized into two periods, months 0–3 (more supervised); and months 4–12 (less supervised).<br><br>Period 0-3: education, supervised aerobic exercise (2/week, 60 minutes, aerobic exercises [20 min], muscle strength/ endurance training [15 min]), individual coaching of physical activity (30 min after 6 and 12 weeks), loan and use of heart rate monitor and the use of a physical activity diary<br>Period 4-9: individual coaching of physical activity (30 min after 6 and 9 months), use of heart rate monitor and the use of the physical activity diary<br>Period 9-12: only use of the heart rate monitor and the use of the physical activity diary | Physiotherapist                                                                                     | Individual coaching of physical activity and activity goals    | No information                                                                                                                     |
| Braden, et al. <sup>13</sup> ; 1993; SLE     | Systemic Lupus Erythematosus Self-Help Course | To improve psychosocial concerns                                      | Seven weekly 21/2-hour sessions for groups of 8-18 adults of all ages: teaches coping skills, conveys information, provides support, and fosters problem solving, cognitive reframing, decision making, and efficacy enhancement.                                                                                                                                                                                                                                                                                                                                                                                                                                                      | lay instructors and health or mental health professional                                            | Standardized workshop                                          | No information                                                                                                                     |
| Broadbent, et al. <sup>14</sup> ; 2014; SSc  | Nintendo Wii Fit exercises                    | Improve functional capacity, exercise tolerance, strength and balance | Three 30-minute sessions of Wii Fit exercises per week for 12 weeks. The exercises included step aerobics, marching and interactive games to develop balance, weight transfer and upper and lower body strength. Following games were chosen: Step Basic, Rhythm Parade, Ski Slalom (beginner), Ski Slalom (advanced), Balance Bubble (beginner), Balance Bubble Plus, Table Tilt (beginner), Penguin Slide, Tightrope Tension (beginner), Tilt City (beginner)                                                                                                                                                                                                                        | Each session was supervised by a clinical exercise physiologist and/or member of the research team. | Single case study – Intervention was designed for the patient. | The participant completed 30 of the 36 sessions (82% compliance), the 'fun factor' appeared to contribute to programme compliance. |

| Authors, Year, Diagnoses                | Item 1: Brief name                                               | Item 2: Why                                                                                                  | Item 3, 4, 6, 7, 8, 10:<br>What (materials, procedures)<br>How<br>Where<br>How much<br>Modification                                                                                                                                                                                                                                                                                                                                                                                                                                                                                                                                                                                                                                                                                                                                                                                                                                                                                                                                                                                                                   | Item 5: Who (provided) | Item 9: Tailoring                                | Item 11, 12:<br>How well (planned, actual)                                                                                                                                                |
|-----------------------------------------|------------------------------------------------------------------|--------------------------------------------------------------------------------------------------------------|-----------------------------------------------------------------------------------------------------------------------------------------------------------------------------------------------------------------------------------------------------------------------------------------------------------------------------------------------------------------------------------------------------------------------------------------------------------------------------------------------------------------------------------------------------------------------------------------------------------------------------------------------------------------------------------------------------------------------------------------------------------------------------------------------------------------------------------------------------------------------------------------------------------------------------------------------------------------------------------------------------------------------------------------------------------------------------------------------------------------------|------------------------|--------------------------------------------------|-------------------------------------------------------------------------------------------------------------------------------------------------------------------------------------------|
| Brown <sup>15</sup> ; 2010; SSc         | Role of the nurse specialist in the management of digital ulcers | Helping patients to deal with the physical, psychological and social effects associated with digital ulcers. | <p><b>Burden of digital ulcers:</b><br/>consultations with the nurse specialist (one-to-one support and education), referral to other specialists such as occupational therapist (for function or work-related issues) or a podiatrist for assistance with the management of foot ulcers; encouraging to join a support group or attend a group educational session and patients should also be given an advice-line number to call for support between visits.</p> <p><b>Prevention of further digital ulcers:</b><br/>encouraged to keep and record information in a diary when their ulcers develop, education to understand the disease process, advice about reduction of exposure to cold, avoidance of emotional stress and cessation of tobacco use, and advice on effective skin care. Patients need to be aware of the danger of infection.</p> <p><b>Wound care for digital ulcers:</b><br/>keep the digital ulcer area as clean as possible, dressings need to be removed every one to two days to inspect the wound for signs of infection and to clean and re-dress the ulcer to prevent infection.</p> | Nurse                  | n.a.                                             | n.a.                                                                                                                                                                                      |
| Brown, et al. <sup>16</sup> ; 2012; SLE | Cognitive behavioral therapy OR Education only                   | To manage pain, enhance disease adjustment and adaptation, increase quality of life                          | <p>Cognitive-Behavioral Therapy (CBT)<br/>Setting: over 6 weeks, each 45 min<br/>Content: CBT included coping skills training and cognitive restructuring techniques.</p> <p>Coping skills training: enhancing existing skills, teaching new skills to manage stressors associated with SLE, training in relaxation, distraction, and problem-solving skills.</p> <p>Restructuring exercises: focus on negative cognitions and evaluative responses to stressful situations in daily life, negative perceptions of physical appearance, and negative responses to pain.</p> <p>Education-Only<br/>Aim: understanding their disease would help patients manage the disease more appropriately.<br/>Setting: 45-minute long modules on a laptop.</p>                                                                                                                                                                                                                                                                                                                                                                    | Therapists             | Content was tailored to the needs of the people. | Telephoned the participants in the week between sessions one and two, sessions two and three, and during the week immediately following the third session to monitor treatment adherence, |

| Authors, Year, Diagnoses                                                            | Item 1: Brief name                                                                    | Item 2: Why                | Item 3, 4, 6, 7, 8, 10:<br>What (materials, procedures)<br>How<br>Where<br>How much<br>Modification                                                                                                                                                                                                                                                                                                                                                                                                                                                                                                                                                                                                                                                                      | Item 5: Who (provided)             | Item 9: Tailoring                                                                                                     | Item 11, 12:<br>How well (planned, actual)                                                                                                                 |
|-------------------------------------------------------------------------------------|---------------------------------------------------------------------------------------|----------------------------|--------------------------------------------------------------------------------------------------------------------------------------------------------------------------------------------------------------------------------------------------------------------------------------------------------------------------------------------------------------------------------------------------------------------------------------------------------------------------------------------------------------------------------------------------------------------------------------------------------------------------------------------------------------------------------------------------------------------------------------------------------------------------|------------------------------------|-----------------------------------------------------------------------------------------------------------------------|------------------------------------------------------------------------------------------------------------------------------------------------------------|
|                                                                                     |                                                                                       |                            | Content: first session focused on the impact of SLE on daily functioning at home and at school, second session, held during the third week, focused on issues pertaining to healthy living (e.g., maintaining a balanced diet, exercise, and appropriate sleep hygiene), third session, conducted during the fifth week, reviewed the material that had been taught up to that point. In addition, two 10–15 minute telephone contacts during the week between the first and second sessions, the second and third sessions, and the week immediately following the third session to review the instructional materials.                                                                                                                                                 |                                    |                                                                                                                       | answer any questions about the module, and ensure compliance with treatment homework.                                                                      |
| Carrera, et al. <sup>17</sup> ; Soriano-Maldonado, et al. <sup>18</sup> ; 2019; SLE | 12-week aerobic exercise intervention                                                 | Improve arterial stiffness | Two 75-min sessions per week during a total of 12 weeks (i.e., 24 sessions) of moderate to vigorous intensity aerobic exercise on a treadmill;<br>All the sessions began with a warm-up comprising 3–4 min of activation on the treadmill at about 35–40% of the heart rate reserve (HRR) and 3–4 min of active stretching of major muscle groups, and ended with a cool down phase of static stretching of major muscle groups and relaxation. During month 2, there were alternated continuous and interval sessions, and at month 3, the patients undertook interval training sessions, where there were periods of lower and periods of higher intensity efforts followed some minutes of rest for hydration. More detailed description is displayed in the article. | Exercise professionals, physicians | Intervention was tailored to the patient's physical condition.                                                        | Adherence to exercise is reported as the median attendance frequency and the proportion of patients attending more as 75% and more as 90% of the sessions. |
| Carrier, et al. <sup>19</sup> ; 2020; SSc                                           | Scleroderma Patient-Centered Intervention Network Self-Management Program (SPIN-SELF) | Increase self-efficacy     | The SPIN-SELF program utilizes social modeling through educational videos of patients with SSc, as well as videos of health professionals; the nine modules focus on (1) coping with pain; (2) skincare, finger ulcers and Raynaud's; (3) sleep problems; (4) fatigue; (5) gastrointestinal symptoms; (6) itch; (7) managing emotions and stress; (8) coping with body image concerns due to disfigurement; and (9) effective communication with health care providers.                                                                                                                                                                                                                                                                                                  | Web based                          | Intervention was tailored to the patient's needs (participants can select the modules in the order that they prefer). | No information.                                                                                                                                            |
| Carrier, et al. <sup>20</sup> ; 2018; SSc                                           | Scleroderma patient-centered intervention network hand exercise program (SPIN-HAND)   | Improve hand functioning   | First 4 weeks focus on exercises 3-5 times per week; graduates from 3-4 minutes in week 1, 5-15 minutes in week 4; week 5, participants are asked to select options to fit their needs (from                                                                                                                                                                                                                                                                                                                                                                                                                                                                                                                                                                             | Web based                          | Intervention was tailored to the                                                                                      | internet-based tool to increase                                                                                                                            |

| Authors, Year, Diagnoses                                                               | Item 1: Brief name                                                 | Item 2: Why                                                                                             | Item 3, 4, 6, 7, 8, 10:<br>What (materials, procedures)<br>How<br>Where<br>How much<br>Modification                                                                                                                                                                                                                                                                                                                                                                                                                                                                                                                                                                   | Item 5: Who (provided) | Item 9: Tailoring                                                                    | Item 11, 12:<br>How well (planned, actual)                                                       |
|----------------------------------------------------------------------------------------|--------------------------------------------------------------------|---------------------------------------------------------------------------------------------------------|-----------------------------------------------------------------------------------------------------------------------------------------------------------------------------------------------------------------------------------------------------------------------------------------------------------------------------------------------------------------------------------------------------------------------------------------------------------------------------------------------------------------------------------------------------------------------------------------------------------------------------------------------------------------------|------------------------|--------------------------------------------------------------------------------------|--------------------------------------------------------------------------------------------------|
|                                                                                        |                                                                    |                                                                                                         | 5-10 minutes to 30-35 minutes per day). The core of the program consists of four modules that address specific aspects of hand function: (1) Thumb Flexibility and Strength (3 exercises); (2) Finger Bending (3 exercises); (3) Finger Extension (3 exercises); and (4) Wrist Flexibility and Strength (2 exercises).                                                                                                                                                                                                                                                                                                                                                |                        | patient's needs (participants can select the modules in the order that they prefer). | adherence and motivation. Log information are used to detect adherence.                          |
| Carvalho, et al. <sup>21</sup> ; 2005; SLE                                             | Supervised cardiovascular training                                 | Improve exercise tolerance, aerobic capacity, fatigue, depression, functional capacity, quality of life | Program was conducted 3 times a week for 12 consecutive weeks and was supervised by 2 physiotherapists: 60 minutes in the morning, consisted of 10 minutes of initial warmup/stretching, 40 minutes of walking, and 10 minutes of cooling down; walk was performed at the ventilatory anaerobic threshold.                                                                                                                                                                                                                                                                                                                                                            | Physiotherapist        | The intensity was set individually at the HR of the patient.                         | No information.                                                                                  |
| Clarke-Jenssen, et al. <sup>22</sup> ; 2005; SLE                                       | Supervised aerobic exercise program                                | To improve pain and fatigue, disease activity, aerobic capacity, physical function                      | Walking on a treadmill at an intensity of 70% of the patients' maximum heart rate. The heart rate was carefully controlled during all walking sessions; walking at a comfortable self-selected speed (from 3.5–5.5 km/hour). The inclination of the treadmill was adjusted (from 0% to 2%) to achieve the desired heart rate. The exercise period increased gradually during the first 3-week period from 25 to 40 minutes, including 5 minutes for warming up and 5 minutes for cooling down. The program included 3 exercise sessions a week for a total of 12 weeks. The number of exercise sessions performed varied from 24 to 33 out of a possible 36 sessions. | No information.        | Tailored to the patient's heart rate, walking at a self-selected speed.              | No information                                                                                   |
| Cunningham, et al. <sup>23</sup> ; 2018; Cunningham, et al. <sup>24</sup> ; 2019; cSLE | Treatment and education approach for childhood-onset lupus (TEACH) | Increase disease activity, fatigue, psychological distress, pain                                        | 6 weekly in-person sessions (60 min); caregivers were invited to attend three of the six sessions. Cognitive behavioral therapy (CBT): psychoeducation for managing physical symptoms, sleep hygiene recommendations, relaxation training, behavioral activation, activity pacing, calming statements, problem solving, and maintenance planning; mindfulness meditation, medication adherence, and                                                                                                                                                                                                                                                                   | Psychologist           | Intervention was tailored to the patient's needs.                                    | Protocol feasibility was assessed by attendance/completion rates and through themes that emerged |



| Authors, Year, Diagnoses                   | Item 1: Brief name                                             | Item 2: Why                                                                                                    | Item 3, 4, 6, 7, 8, 10:<br>What (materials, procedures)<br>How<br>Where<br>How much<br>Modification                                                                                                                                                                                                                                                                                                                                                                                                                                                                                                                                                                                                                                                                                                                                                                           | Item 5: Who (provided)        | Item 9: Tailoring                                                                     | Item 11, 12:<br>How well (planned, actual)                                                                                    |
|--------------------------------------------|----------------------------------------------------------------|----------------------------------------------------------------------------------------------------------------|-------------------------------------------------------------------------------------------------------------------------------------------------------------------------------------------------------------------------------------------------------------------------------------------------------------------------------------------------------------------------------------------------------------------------------------------------------------------------------------------------------------------------------------------------------------------------------------------------------------------------------------------------------------------------------------------------------------------------------------------------------------------------------------------------------------------------------------------------------------------------------|-------------------------------|---------------------------------------------------------------------------------------|-------------------------------------------------------------------------------------------------------------------------------|
|                                            |                                                                |                                                                                                                | challenging automatic thoughts, was included during the iterative refinement process                                                                                                                                                                                                                                                                                                                                                                                                                                                                                                                                                                                                                                                                                                                                                                                          |                               |                                                                                       | from the qualitative interviews.                                                                                              |
| Daltroy, et al. <sup>25</sup> ; 1995; SLE  | Exercise prescription and unsupervised home exercise programme | Improve exercise tolerance, fatigue, depression, helplessness                                                  | 12 week home cardiopulmonary conditioning; Stationary bicycles were provided, patients were asked to exercise three times per week for 30 min, achieving a heart rate of 60-80% of the maximum heart rate achieved on the ETT.                                                                                                                                                                                                                                                                                                                                                                                                                                                                                                                                                                                                                                                | Physiotherapist               | The intensity of the exercise sessions was set individually at the HR of the patient. | Physical therapist or research assistant contacted the patient once a week to update logs of exercise                         |
| Dobkin, et al. <sup>26</sup> ; 2002; SLE   | Brief Supportive-Expressive Group Psychotherapy                | Reducing psychological distress<br>2) medical symptoms<br>3) health care costs<br>4) improving quality of life | Training included materials pertaining to SLE (e.g., medications, common psychosocial challenges); weekly for 12 weeks, each session 90 min, in total of 22.5 hr of patient contact; "Booster sessions" were offered once per month for 3 months (reinforce changes and encourage the transfer of new experiences into daily life); Specific topics: (a) medical status and treatment; (b) doctor-patient relationships; (c) family and social network; (d) group therapy issues (e.g., cohesion, asking for or receiving help from others); (e) illness-related coping skills; (f) illness, dying, and feelings regarding these issues; (g) life values and principles; and (h) self-image; end of each session, a brief self-hypnosis exercise was carried out with the guidance of the therapist. Participants were encouraged to practice it at home in between sessions. | Psychologists, social workers | Order of topics according to the members' needs.                                      | The intervention was designed to prevent symptom exacerbation and improve compliance and coping. Measured by attendance-rate. |
| Doerfler, et al. <sup>27</sup> ; 2017; SSc | Medical nutrition therapy (MNT) intervention                   | To increase physical activity, health related quality of life                                                  | Undernutrition and weight loss - Increase calories by 500-1000/d through the following strategies:<br>- Increasing frequency of snacks<br>- Layering calories by adding healthy oils and spreads to foods<br>- Preventing missed calories by developing a prescribed pattern of regular eating<br>- Add liquid calories to meals and snacks<br>- Oral enteral supplements (either premade or homemade) based on preferences<br>GI complaints: dysphagia - Modified texture:                                                                                                                                                                                                                                                                                                                                                                                                   | Dietitian                     | Whole intervention was declared as individualized nutrition counseling.               | Patients were contacted weekly by phone or email by the dietitian to enhance intervention adherence.                          |

| Authors,<br>Year,<br>Diagnoses                | Item 1: Brief name                              | Item 2: Why                                                       | Item 3, 4, 6, 7, 8, 10:<br>What (materials, procedures)<br>How<br>Where<br>How much<br>Modification                                                                                                                                                                                                                                                                                                                                                                                                                                                                                                                                                                                                                                                                                                                                                                                                                                                                                                                                                                                                                                                                                                                                                                                                                      | Item 5: Who<br>(provided) | Item 9: Tailoring                                 | Item 11, 12:<br>How well<br>(planned,<br>actual)                                                |
|-----------------------------------------------|-------------------------------------------------|-------------------------------------------------------------------|--------------------------------------------------------------------------------------------------------------------------------------------------------------------------------------------------------------------------------------------------------------------------------------------------------------------------------------------------------------------------------------------------------------------------------------------------------------------------------------------------------------------------------------------------------------------------------------------------------------------------------------------------------------------------------------------------------------------------------------------------------------------------------------------------------------------------------------------------------------------------------------------------------------------------------------------------------------------------------------------------------------------------------------------------------------------------------------------------------------------------------------------------------------------------------------------------------------------------------------------------------------------------------------------------------------------------|---------------------------|---------------------------------------------------|-------------------------------------------------------------------------------------------------|
|                                               |                                                 |                                                                   | <ul style="list-style-type: none"> <li>- Dysphagia diet modification level identified</li> <li>- Drizzling healthy fats to meals for calories and lubrication</li> <li>- Consume texture-appropriate liquids to meals to improve food bolus clearance Gastroesophageal reflux disease and esophageal dysmotility</li> <li>- Diet and lifestyle modifications:</li> <li>- Elevate head of bed when sleeping as directed by gastroenterologist</li> <li>- Avoid tightfitting clothing to reduce reflux</li> <li>- Remain upright after late-day meals to reduce reflux</li> <li>- Small, frequent meals</li> <li>- Lower fiber and lower fat foods to improve gastric emptying</li> <li>- Rely on gravity for esophageal clearance: pureed foods or liquid meals when symptoms flare</li> <li>Bloating, gas, and constipation - Volume and carbohydrate modified:</li> <li>- Increase liquid meals and pureed options for gastroparesis</li> <li>- Low FODMAPS diet</li> <li>- Lactose- and sugar-modified oral supplements if calories are needed</li> <li>Diarrhea and fecal incontinence</li> <li>- Small frequent meals</li> <li>- Provide low-lactose fluids and oral rehydration solutions to prevent dehydration</li> <li>Constipation</li> <li>- Nutrition management of fluids, fiber, and food volume</li> </ul> |                           |                                                   |                                                                                                 |
| Drenkard, et al.<br><sup>28</sup> ; 2020; SLE | Chronic Disease Self-Management Program (CDSMP) | Improvement in quality of life, self-management, disease severity | Chronic Disease Self-Management Program (CDSMP) is a workshop for adults with at least one chronic health condition. It focuses on disease management skills including decision making, problem-solving, and action planning.<br>Key Activities: Interactive educational activities like discussions, brain storming, practice of action-planning and feedback, behavior modeling, problem-solving techniques, and decision making. Also includes symptom management activities like                                                                                                                                                                                                                                                                                                                                                                                                                                                                                                                                                                                                                                                                                                                                                                                                                                     | Lay instructors           | Intervention was tailored to the patient's needs. | The study's aim was to evaluate barriers to recruitment and retention of African–American women |

| Authors,<br>Year,<br>Diagnoses | Item 1: Brief name | Item 2: Why | Item 3, 4, 6, 7, 8, 10:<br>What (materials, procedures)<br>How<br>Where<br>How much<br>Modification                                                                                                                                                                                                                         | Item 5: Who<br>(provided) | Item 9: Tailoring | Item 11, 12:<br>How well<br>(planned,<br>actual)                                                                                                                                                                                                                                                                                                                                                                                                         |
|--------------------------------|--------------------|-------------|-----------------------------------------------------------------------------------------------------------------------------------------------------------------------------------------------------------------------------------------------------------------------------------------------------------------------------|---------------------------|-------------------|----------------------------------------------------------------------------------------------------------------------------------------------------------------------------------------------------------------------------------------------------------------------------------------------------------------------------------------------------------------------------------------------------------------------------------------------------------|
|                                |                    |             | <p>exercise, relaxation, communication, healthy eating, medication management, and managing fatigue.<br/>           Setting: Community/ Group-based workshop.<br/>           Suggested class size: Between 10 and 16 participants.<br/>           Duration: Participants meet for two hours once a week, for six weeks.</p> |                           |                   | <p>with SLE in this program; major barriers were unpredicted personal and health-related issues, misunderstanding of the scope and benefits of the intervention, and transportation problems. Early implementation of tailored strategies helped to reduce participant barriers and achieve a CDSMP registration of 168 participants, with 126 (75%) completers. Frequent contact with participants and compensation helped to reach 92.3% retention</p> |

| Authors, Year, Diagnoses                     | Item 1: Brief name                               | Item 2: Why                                                                | Item 3, 4, 6, 7, 8, 10: What (materials, procedures) How Where How much Modification                                                                                                                                                                                                                                                                                                                                                                                                                                                                                                                                                                                                                                        | Item 5: Who (provided)                          | Item 9: Tailoring                                              | Item 11, 12: How well (planned, actual)                                    |
|----------------------------------------------|--------------------------------------------------|----------------------------------------------------------------------------|-----------------------------------------------------------------------------------------------------------------------------------------------------------------------------------------------------------------------------------------------------------------------------------------------------------------------------------------------------------------------------------------------------------------------------------------------------------------------------------------------------------------------------------------------------------------------------------------------------------------------------------------------------------------------------------------------------------------------------|-------------------------------------------------|----------------------------------------------------------------|----------------------------------------------------------------------------|
|                                              |                                                  |                                                                            |                                                                                                                                                                                                                                                                                                                                                                                                                                                                                                                                                                                                                                                                                                                             |                                                 |                                                                | for the 6-month survey.                                                    |
| Drenkard, et al. <sup>29</sup> ; 2012; SLE   | Chronic Disease Self-Management Program (CDSMP)  | To increase health status, self-efficacy and self-management behaviors     | Setting: six weekly sessions, each lasting 2.5 hours, led by two trained leaders and conducted in a small group (10–15 participants)<br>Content: The CDSMP curriculum addresses depression, anger/fear/frustration and fatigue management, better breathing, exercise, healthy eating, medication management, working with health professionals, and cognitive techniques for relaxation and symptom management.                                                                                                                                                                                                                                                                                                            | lay instructors                                 | Individualised program                                         | No information                                                             |
| Edworthy, et al. <sup>30</sup> ; 2003; SLE   | Brief supportive-expressive group psychotherapy  | Reduce illness-induced interference with valued activities and interests   | Authors refer to Dobkin, et al. <sup>26</sup>                                                                                                                                                                                                                                                                                                                                                                                                                                                                                                                                                                                                                                                                               | Authors refer to Dobkin, et al. <sup>26</sup> . | Authors refer to Dobkin, et al. <sup>26</sup>                  | Authors refer to Dobkin, et al. <sup>26</sup>                              |
| Everett, et al. <sup>31</sup> ; 2015; SLE    | Patient-centered nutrition counselling           | Improve selection of nutrient; anthropometric and clinical outcomes        | Setting: nutrition counselling in form of individual face-to-face initial consultation (60 minutes) and follow-up visits (30 minutes each) over a six-month period; at least once a month over the six-month period.<br>Goal of counselling: reduce total and saturated fat intake, sodium intake, cholesterol intake, and overall calorie intake (for weight management), and to increase omega-3 fatty acid and fiber intake, according to Therapeutic Lifestyle Change (TLC) guidelines.<br>Content: goal-setting; self-monitoring practices (use of food diaries); motivational interviewing (MI); tailored instruction based on stage of change; addressing patients' barriers to making and maintaining diet changes. | Dietitian                                       | Individual face-to-face initial consultation                   | Attended an average of 3 sessions (range 2–5).                             |
| Filippetti, et al. <sup>32</sup> ; 2020; SSC | Home-based minimally supervised exercise program | Improve functional capacity, health related quality of life and disability | Consists of an aerobic exercise on a stationary bike (Energetics ct220p, Neomark Sarl, Luxembourg), muscular endurance training of the upper limb, and stretching exercises for the hands; three times a week.<br>Each session consisted of three phases: (i) Patient pedaled for five minutes without a load; (ii) Patient was instructed to set the                                                                                                                                                                                                                                                                                                                                                                       | Not reported.                                   | Intervention was tailored to the patient's physical condition. | Patients were asked about their side effects and adherence to the exercise |

| Authors,<br>Year,<br>Diagnoses | Item 1: Brief name | Item 2: Why | Item 3, 4, 6, 7, 8, 10:<br>What (materials, procedures)<br>How<br>Where<br>How much<br>Modification                                                                                                                                                                                                                                                                                                                                                                                                                                                                                                                                                                                                                                                                                                                                                                                                                                                                                                                                                                                                   | Item 5: Who<br>(provided) | Item 9: Tailoring | Item 11, 12:<br>How well<br>(planned,<br>actual)                                                                                                                                                                                                                                                                                                                                                                                                 |
|--------------------------------|--------------------|-------------|-------------------------------------------------------------------------------------------------------------------------------------------------------------------------------------------------------------------------------------------------------------------------------------------------------------------------------------------------------------------------------------------------------------------------------------------------------------------------------------------------------------------------------------------------------------------------------------------------------------------------------------------------------------------------------------------------------------------------------------------------------------------------------------------------------------------------------------------------------------------------------------------------------------------------------------------------------------------------------------------------------------------------------------------------------------------------------------------------------|---------------------------|-------------------|--------------------------------------------------------------------------------------------------------------------------------------------------------------------------------------------------------------------------------------------------------------------------------------------------------------------------------------------------------------------------------------------------------------------------------------------------|
|                                |                    |             | <p>brake at a load of approximately 60% of the watts achieved at the peak of the maximal ergocycle exercise test; two periods of fifteen minutes divided by a recovery of three minutes; (iii) Five minutes of cooldown without a load.</p> <p>Frequency of pedaling higher than 60 rotations/min during the second phase and 50 during the other phases.</p> <p>Upper limbs training, the patients performed two series of 10 repetitions separated by 2 minutes of rest consisting in repeatedly lifting and lowering a weight from the waist to the shoulders. The load was about 60% of the 1-RM.</p> <p>Stretching of the upper limbs, shoulders, and neck was performed after each exercise session. The load for the strength and aerobic exercise was decreased by 20% to allow a gradual muscular adaptation, in the first 2 weeks. After 3 months, the loads were adjusted on the basis of the results of the maximal cardiopulmonary test and of 1-RM.</p> <p>The patients were given written and illustrated instructions for hand stretching, which had to be performed twice daily.</p> |                           |                   | <p>program. The patients were invited to report each type of exercise whether the tasks were partially completed, completed, or not carried out (which corresponded to a score of 1-0.5-0, respectively) on a diary card. The attendance rate at the training session was calculated as the ratio between the scores registered on the diary card within 3 months (1-3, 4-6 months) and the number of scheduled sessions in the same period.</p> |

| Authors, Year, Diagnoses                   | Item 1: Brief name                                                                               | Item 2: Why                                                | Item 3, 4, 6, 7, 8, 10:<br>What (materials, procedures)<br>How<br>Where<br>How much<br>Modification                                                                                                                                                                                                                                                                                                                                                                                                                                                                                                                                                                                                                                                                                                                                                                                                                                                                                                                                                                                                                                                                                                                                                                                                                                                                                                                       | Item 5: Who (provided) | Item 9: Tailoring   | Item 11, 12:<br>How well (planned, actual) |
|--------------------------------------------|--------------------------------------------------------------------------------------------------|------------------------------------------------------------|---------------------------------------------------------------------------------------------------------------------------------------------------------------------------------------------------------------------------------------------------------------------------------------------------------------------------------------------------------------------------------------------------------------------------------------------------------------------------------------------------------------------------------------------------------------------------------------------------------------------------------------------------------------------------------------------------------------------------------------------------------------------------------------------------------------------------------------------------------------------------------------------------------------------------------------------------------------------------------------------------------------------------------------------------------------------------------------------------------------------------------------------------------------------------------------------------------------------------------------------------------------------------------------------------------------------------------------------------------------------------------------------------------------------------|------------------------|---------------------|--------------------------------------------|
| Freedman, et al. <sup>33</sup> ; 1984; SSc | 1) Autogenic training OR<br>2) Finger temperature biofeedback OR<br>3) Frontalis EMG biofeedback | To improve finger temperature (Skin)                       | <p>First session (pretraining voluntary control): increase temperature of fingers as much as possible using any mental means during a 16-min period</p> <p>Second session (pretraining cold stress): identical to first session, except that the middle phalanx of the middle finger of the dominant side rested for 16-min on a cold stimulus, whose temperature decreased from 30 to 20 degrees at a rate of 1 degree for 10 min and was then maintained at 20 degrees for 6 min.</p> <p>One of three treatments: 10 biweekly training sessions: 10 min of adaptation, a 16-min resting baseline, and 16 min of feedback or instructions</p> <p>Temperature biofeedback: sinusoidal tone whose pitch varied inversely with the temperature of the middle finger of their dominant hand, subjects were told to increase the temperature of their fingers as much as possible using the tone as a guide.</p> <p>Autogenic training: tape-recorded instructions for 3 min, after which they repeated the phrase "my hands are warm and heavy" for 13 min.</p> <p>EMG biofeedback: sinusoidal tone whose pitch varied directly with the amplitude of their frontalis EMG, which had been rectified and smoothed (time constant = 0.5 sec), the subjects were told to relax all of the muscles in their body as much as possible using the tone as a guide.</p> <p>All were instructed to practice at home the same way.</p> | No information.        | No tailoring.       | No information.                            |
| Greco <sup>34</sup> ; 2015; SLE            | Mind-Body Skills Training (MBST)                                                                 | Reducing depressive Symptoms                               | In 8 individual sessions (CBT), each lasting approximately one hour, sessions take place on a weekly basis, so that the intervention phase of the study lasts for approximately two months.                                                                                                                                                                                                                                                                                                                                                                                                                                                                                                                                                                                                                                                                                                                                                                                                                                                                                                                                                                                                                                                                                                                                                                                                                               | No information         | No information      | No information                             |
| Greco, et al. <sup>35</sup> ; 2004; SLE    | Stress-reduction program: BF /CBT (biofeedback/cognitive behavioural therapy)                    | To improve pain, psychological function, physical function | BF /CBT (biofeedback/cognitive behavioural therapy): standardized 6-session protocol that included auditory electromyographic biofeedback from the trapezius area, progressive muscle relaxation, and cognitive-behavioral pain and stress management training. Cognitive-behavioral training                                                                                                                                                                                                                                                                                                                                                                                                                                                                                                                                                                                                                                                                                                                                                                                                                                                                                                                                                                                                                                                                                                                             | Licensed psychologist  | Individual coaching | No information                             |

| Authors, Year, Diagnoses                   | Item 1: Brief name                                                                                        | Item 2: Why                   | Item 3, 4, 6, 7, 8, 10:<br>What (materials, procedures)<br>How<br>Where<br>How much<br>Modification                                                                                                                                                                                                                                                                                                                                                                                                                                                                                                                                                                                                                                                                                                                                                                                                                                                                                                                                                          | Item 5: Who (provided)                               | Item 9: Tailoring                   | Item 11, 12:<br>How well (planned, actual)                         |
|--------------------------------------------|-----------------------------------------------------------------------------------------------------------|-------------------------------|--------------------------------------------------------------------------------------------------------------------------------------------------------------------------------------------------------------------------------------------------------------------------------------------------------------------------------------------------------------------------------------------------------------------------------------------------------------------------------------------------------------------------------------------------------------------------------------------------------------------------------------------------------------------------------------------------------------------------------------------------------------------------------------------------------------------------------------------------------------------------------------------------------------------------------------------------------------------------------------------------------------------------------------------------------------|------------------------------------------------------|-------------------------------------|--------------------------------------------------------------------|
|                                            |                                                                                                           |                               | included problem-solving strategies for coping with pain, other lupus symptoms, and interpersonal issues; the training also included recognition and alteration of automatic maladaptive thinking patterns that can contribute to stress and pain.                                                                                                                                                                                                                                                                                                                                                                                                                                                                                                                                                                                                                                                                                                                                                                                                           |                                                      |                                     |                                                                    |
| Gregory, et al. <sup>36</sup> ; 2019; SSC  | Daily hand exercises with daily home wax bath hand treatment                                              | Improvement in hand function  | <p>Set of three finger exercises was combined with paraffin wax bath.</p> <p>The wax bath is heated to 45 to 55 °C participants place their hands in to the wax, up to the wrist level and then remove within a few seconds(Fig.1). This dipping into the wax is repeated 5 or 6 times. The hand is then wrapped in a plastic bag and then a towel to prolong the heating period. The wax layering, bag and towel are then left on for 10 minutes. Participants were asked to perform wax bath treatment to each hand no less than 4 times per week.</p> <p>The three stretches involved (i) push in to full finger flexion, (ii) push in to full finger extension and(iii) a push in to proximal interphalangeal joint extension whilst maintaining distal interphalangeal and metacarpophalangeal joint flexion. Participants were asked to perform these stretch exercises 3 or 10 times per day. The participants in the wax bath group were asked to perform at least one of these exercise repetitions immediately after their wax bath treatment.</p> | Physiotherapist                                      | No tailoring.                       | Patient reported Compliance showed 100% compliance in both groups. |
| Harrison, et al. <sup>37</sup> ; 2005; SLE | MINDFUL (Mastering the Intellectual Navigation of Daily Functioning and Undoing the Limitations of Lupus) | Improve cognitive dysfunction | Intervention combines functional strategy training and psychosocial support based on the theory that basic cognitive strategies can be learned and then generalized or applied for use across different day-to-day situations. This Multicontext approach teaches selfmonitoring techniques to increase awareness of cognitive lapse so that appropriate strategies can be applied to these lapses. The intervention consisted of eight weekly 2-hour sessions led by an occupational therapist.                                                                                                                                                                                                                                                                                                                                                                                                                                                                                                                                                             | Occupational therapist                               | No information.                     | No information.                                                    |
| Haupt, et al. <sup>38</sup> ; 2005; SLE    | Psychological intervention                                                                                | Improving coping              | Groups of up to eight patients, in two blocks over six months each                                                                                                                                                                                                                                                                                                                                                                                                                                                                                                                                                                                                                                                                                                                                                                                                                                                                                                                                                                                           | Rheumatologically qualified physicians together with | General discussion was conducted to | The patients attended an average of 15                             |

| Authors, Year, Diagnoses                    | Item 1: Brief name                            | Item 2: Why                                                                                                  | Item 3, 4, 6, 7, 8, 10:<br>What (materials, procedures)<br>How<br>Where<br>How much<br>Modification                                                                                                                                                                                                                                                                                                                                                                                                                                                                                                                                                                                                                                                                                | Item 5: Who (provided)                                                                                                   | Item 9: Tailoring                                                                                                                        | Item 11, 12:<br>How well (planned, actual)                                              |
|---------------------------------------------|-----------------------------------------------|--------------------------------------------------------------------------------------------------------------|------------------------------------------------------------------------------------------------------------------------------------------------------------------------------------------------------------------------------------------------------------------------------------------------------------------------------------------------------------------------------------------------------------------------------------------------------------------------------------------------------------------------------------------------------------------------------------------------------------------------------------------------------------------------------------------------------------------------------------------------------------------------------------|--------------------------------------------------------------------------------------------------------------------------|------------------------------------------------------------------------------------------------------------------------------------------|-----------------------------------------------------------------------------------------|
|                                             |                                               |                                                                                                              | <p>Psychoeducational interventions: Information on symptoms, course, prognosis, and therapeutic options (two sessions); assessment and handling of the disease (three sessions); development and sustainability of social contacts and competence (three sessions).</p> <p>Psychotherapeutic interventions: directed at identification and management of disease related/disease affecting anxieties (three sessions), coping possibilities concerning fatigue and reduction of initiative and motivation in everyday living (two sessions), with structuring day activities and establishing pleasurable contacts, how to cope with stress and the usual everyday problems under conditions of a continuously present illness (two sessions), Coping with pain (one session).</p> | members of the German Lupus Erythematosus Self Help Group, graduate psychotherapist                                      | enable participants to highlight problems that were still unresolved or remained unmentioned within the previous sessions (one session). | group sessions (minimum 12, maximum 18). Three patients attended fewer than 14 sessions |
| Herschman, et al. <sup>39</sup> ; 2014; SLE | Mobile app for adolescents with SLE           | To improve autonomy; enabling symptom tracking; and facilitating communication with care providers and peers | Project outcomes included the selection of the following features: symptom tracking; appointment and medication reminders; a social media component; a medical summary; easy navigation; informational content; gamification; and personalization (options for customization).                                                                                                                                                                                                                                                                                                                                                                                                                                                                                                     | n.a.                                                                                                                     | n.a.                                                                                                                                     | n.a.                                                                                    |
| Horton, et al. <sup>40</sup> ; 1997; SLE    | LupusLine (telephone peer counseling service) | Satisfaction on LupusLine                                                                                    | Telephone peer counseling service; to bridge a gap in psychosocial support services for people with systemic lupus erythematosus (SLE) and their family members. Goal: mission of the program is to enhance coping strategies, self-esteem, and health-related behaviors, and to reduce feelings of isolation and anxiety as users struggle with the challenges of living with SLE.                                                                                                                                                                                                                                                                                                                                                                                                | Professionally screened by a social worker, further counselling with peers (trained patients with SLE or family members) | Individual counselling.                                                                                                                  | No information.                                                                         |
| Horváth, et al. <sup>41</sup> ; 2017; SSc   | Hand physical therapy                         | Improve hand function                                                                                        | Complex physiotherapy program including thermal baths (37-38°C, 30 minutes/day), mud baths of the hands (42°C, 20 minutes/day), whirlpool therapy of the extremities (37-38°C mineral water, 20 minutes/day), medical massages of the trunk                                                                                                                                                                                                                                                                                                                                                                                                                                                                                                                                        | Occupational therapist, physiotherapist                                                                                  | Partly personalized adaption to client's needs.                                                                                          | No information.                                                                         |



| Authors, Year, Diagnoses                          | Item 1: Brief name                        | Item 2: Why                                       | Item 3, 4, 6, 7, 8, 10:<br>What (materials, procedures)<br>How<br>Where<br>How much<br>Modification                                                                                                                                                                                                                                                                                                                                                                                                                                                                                                                                                                                                                             | Item 5: Who (provided) | Item 9: Tailoring                                 | Item 11, 12:<br>How well (planned, actual) |
|---------------------------------------------------|-------------------------------------------|---------------------------------------------------|---------------------------------------------------------------------------------------------------------------------------------------------------------------------------------------------------------------------------------------------------------------------------------------------------------------------------------------------------------------------------------------------------------------------------------------------------------------------------------------------------------------------------------------------------------------------------------------------------------------------------------------------------------------------------------------------------------------------------------|------------------------|---------------------------------------------------|--------------------------------------------|
|                                                   |                                           |                                                   | and the upper extremities (mechanical, stimulating and vasodilator techniques in 30 minutes/occasion), exercise (30 minutes/day, isometric, isotonic and stretching hand exercises; 15 minutes isotonic and stretching exercises for the spine, hip and knee); occupational therapy (30-60 minutes; muscle facilitation, proprioceptive training, improvement of coordination and fine motor skills, practicing self-care tasks if needed).                                                                                                                                                                                                                                                                                     |                        |                                                   |                                            |
| Kankaya and Karadakovan <sup>42</sup> ; 2020; SLE | Web-based education and counselling       | Improve self-efficacy, fatigue, care satisfaction | Education topics included: (i) Information about SLE, including a definition, frequency, causal factors, signs and symptoms, treatment, prognosis and complications; (ii) Management of fever; (iii) Fatigue and rest; (iv) Exercise; (v) The psychological effects of lupus and stress reduction; (vi) Prevention, early identification and management of lupus flares; (vii) Skin care and sun protection; (viii) Nutrition; (ix) Protection of joints; (x) sex and lupus; (xi) Pregnancy, contraception and birth; and (xii) Use of medicines; literacy level was adjusted to primary-school level. Individual consultancy and information updates were made by the researcher according to the questions asked by patients. | Physician, nurse       | Intervention was tailored to the patient's needs. | No information.                            |
| Karlson, et al. <sup>43</sup> ; 2004; SLE         | Psychoeducational Intervention            | Improve patient self-efficacy and partner support | 30–45-minute discussion between educator, patient, and partner, after a regular visit for medical care, patients chose their own partners, the pair identified the problems they wished to work on, and they came up with their own plans. First aim: The couple was introduced to a problem-solving approach, including problem identification, generation and evaluation of alternative solutions, choosing a solution, and making concrete plans. Second aim: identify discordant patient and partner beliefs about patient self-management abilities, to help them come to a common understanding of the patient's actual abilities and improve their communication about lupus management.                                 | Nurse, partner         | Whole intervention is tailored                    | n.a.                                       |
| Keramiotou, et al. <sup>44</sup> ; 2020; SLE      | Individually tailored 30-min daily upper- | Improve hand function                             | Participants were provided with a booklet including pictures and instructions for the exercise programme and a kit of equipment including a stick, two resistance bands and a plastic container of                                                                                                                                                                                                                                                                                                                                                                                                                                                                                                                              | Hand therapist         | Intervention was tailored to the patient's        | In order to enhance adherence,             |

| Authors, Year, Diagnoses                     | Item 1: Brief name                                                                  | Item 2: Why                   | Item 3, 4, 6, 7, 8, 10:<br>What (materials, procedures)<br>How<br>Where<br>How much<br>Modification                                                                                                                                                                                                                                                                                                                                                                                                                                                                                                                                       | Item 5: Who (provided)                 | Item 9: Tailoring                                     | Item 11, 12:<br>How well (planned, actual)                                                                                    |
|----------------------------------------------|-------------------------------------------------------------------------------------|-------------------------------|-------------------------------------------------------------------------------------------------------------------------------------------------------------------------------------------------------------------------------------------------------------------------------------------------------------------------------------------------------------------------------------------------------------------------------------------------------------------------------------------------------------------------------------------------------------------------------------------------------------------------------------------|----------------------------------------|-------------------------------------------------------|-------------------------------------------------------------------------------------------------------------------------------|
|                                              | limb exercise programme                                                             |                               | 4oz, with therapeutic putty of medium soft or medium resistance depending on their strength.<br><br>Exercise programme was tailored to the strength, pain level and flexibility of the patient. The initial intensity of exercise was set at a moderate level and the programme was reassessed, using a modified Borg Scale, to maintain the same intensity, in every face to face session with the hand therapist at 0, 3, 6 and 9 weeks. Patients in the exercise group received by the hand therapist a 30-min daily programme at home of strengthening and stretching upper limb exercises for 12 weeks, in addition to routine care. |                                        | physical condition.                                   | participants were provided with an exercise diary to record completion of the daily exercise programme.                       |
| Khanna <sup>45</sup> ; 2019; SSc             | Internet-based self-management program                                              | Enhancing self-management     | The site will be accessed via secured website. The modules will be presented 1-2 per week and will be moderated by a researcher with expertise in moderating Discussion Boards.                                                                                                                                                                                                                                                                                                                                                                                                                                                           | Researcher                             | No information                                        | No information                                                                                                                |
| Khanna, et al. <sup>46</sup> ; 2020; SSc     | Internet-Based Self-Management Program                                              | Improve self-efficacy         | Self-management website, with 1 module focus made available per week; 15 modules included a basic overview, coping and body image, exercise, self-advocacy, pain management, activities of daily living, fatigue and energy conservation, tips for families and caregivers, muscle and lung disease with a focus on African Americans, gastrointestinal tract, Raynaud's disease, sexuality and scleroderma, mouth and teeth care, clinical trials, and emergencies. Two investigators moderated online discussion. Participants were asked to log on to the discussion board at least once weekly.                                       | Web-based                              | Intervention was tailored to the patient's needs.     | Not reported.                                                                                                                 |
| Kristensen, et al. <sup>47</sup> ; 2019; SSc | Paraffin prior to hand exercises compared to lukewarm water prior to hand exercises | Improvements in hand function | Hands actively warmed up (CG warmed water, 37° Celsius; IG paraffin bath 52° Celsius)<br>Both groups received an individual exercise programme consisting of 12 active range-of-motion exercises for the forearm, the wrist and the fingers, and a few stretching exercises (detailed description see: <a href="https://journals.sagepub.com/doi/suppl/10.1177/1758998318824346">https://journals.sagepub.com/doi/suppl/10.1177/1758998318824346</a> ). Exercises were selected according to each patient's impairment in hand mobility measured at baseline.                                                                             | Self-administered (after instruction). | Intervention was tailored to the patient's condition. | All patients followed the treatment allocated, but the frequency of performing the advised number of exercise sessions varied |

| Authors, Year, Diagnoses                     | Item 1: Brief name                       | Item 2: Why                                                       | Item 3, 4, 6, 7, 8, 10:<br>What (materials, procedures)<br>How<br>Where<br>How much<br>Modification                                                                                                                                                                                                                                                                                                                                                                                                                                                                                                                                                                               | Item 5: Who (provided)                                                                | Item 9: Tailoring                                                       | Item 11, 12:<br>How well (planned, actual)                                                                                                                                        |
|----------------------------------------------|------------------------------------------|-------------------------------------------------------------------|-----------------------------------------------------------------------------------------------------------------------------------------------------------------------------------------------------------------------------------------------------------------------------------------------------------------------------------------------------------------------------------------------------------------------------------------------------------------------------------------------------------------------------------------------------------------------------------------------------------------------------------------------------------------------------------|---------------------------------------------------------------------------------------|-------------------------------------------------------------------------|-----------------------------------------------------------------------------------------------------------------------------------------------------------------------------------|
|                                              |                                          |                                                                   | The program was performed twice daily for six months (30 min per exercise session) at home self-administered by the patient.                                                                                                                                                                                                                                                                                                                                                                                                                                                                                                                                                      |                                                                                       |                                                                         | (average percentage of adherence was 68% (range 13% to 96%) in the water group and 59% (range 17% to 95%) in the paraffin group). No patients were excluded due to low adherence. |
| Kusnanto, et al. <sup>48</sup> ; 2018; SLE   | Orem's self-care model                   | Improve self-care agency, self-care operation and quality of life | education and counselling: 4 h in the self-care management training program (the education part), followed by four weekly home visits of about 30 min each (the counselling part).<br>home visits: patients were asked about SLE symptom recurrence in the previous week and precipitating factors of symptoms, then assessed the self-care activities that had been implemented, the problems that had been encountered, discussed alternative solutions, gave counselling when needed, and made progress notes.<br>The modules were divided into five parts: 1) lupus, 2) physical activity, 3) healthy diet, 4) stress management, and 5) managing SLE symptoms independently. | Nurses                                                                                | Counselling part was tailored to the patients needs.                    | No information.                                                                                                                                                                   |
| Kwakkenbos, et al. <sup>49</sup> ; 2014; SSc | Cognitive-Behavioural Therapy            | Reduce emotional distress and concerns about the future           | The intervention (in addition to usual care) consisted of an intake interview, 5 sessions that focused on depressive symptoms, 4 sessions that targeted fear of disease progression and a tenth session focused on relapse prevention and evaluation of the intervention.                                                                                                                                                                                                                                                                                                                                                                                                         | Psychologist                                                                          | Tailored cognitive-behavioural therapy                                  | No information.                                                                                                                                                                   |
| Kwakkenbos, et al. <sup>50</sup> ; 2011; SSc | Group-based psycho-educational programme | Improve disease related cognitions, depressed mood,               | Groups of 6 to 10 patients; programme consists of modules of 1.5 hours each, covering 13 different topics, over three weekends: goal setting and evaluation, education about disease characteristics, diagnosis and treatment, education about joint protection and energy conservation, discussing psychosocial                                                                                                                                                                                                                                                                                                                                                                  | goal setting and evaluation (social worker), education about disease characteristics, | At the start of each session, the participating patients' questions and | No information.                                                                                                                                                                   |

| Authors, Year, Diagnoses                 | Item 1: Brief name                                                     | Item 2: Why                         | Item 3, 4, 6, 7, 8, 10:<br>What (materials, procedures)<br>How<br>Where<br>How much<br>Modification                                                                                                                                                                                                                                                                                                                                                                                                                                                                                                                                                                                                                                                                                                                                                                                                                         | Item 5: Who (provided)                                                                                                                                                                                                                                     | Item 9: Tailoring                                                                                      | Item 11, 12:<br>How well (planned, actual)   |
|------------------------------------------|------------------------------------------------------------------------|-------------------------------------|-----------------------------------------------------------------------------------------------------------------------------------------------------------------------------------------------------------------------------------------------------------------------------------------------------------------------------------------------------------------------------------------------------------------------------------------------------------------------------------------------------------------------------------------------------------------------------------------------------------------------------------------------------------------------------------------------------------------------------------------------------------------------------------------------------------------------------------------------------------------------------------------------------------------------------|------------------------------------------------------------------------------------------------------------------------------------------------------------------------------------------------------------------------------------------------------------|--------------------------------------------------------------------------------------------------------|----------------------------------------------|
|                                          |                                                                        | physical functioning                | aspects of the disease and education about the benefits of exercise and an introduction lesson of Tai Chi. Patients were invited to bring their partner or a significant other person at the first day.                                                                                                                                                                                                                                                                                                                                                                                                                                                                                                                                                                                                                                                                                                                     | diagnosis and treatment (rheumatologist), education about joint protection and energy conservation (occupational therapist), discussing psychosocial aspects of the disease (psychologist) and education about the benefits of exercise (Physiotherapist). | problems related to that topic are individually assessed to determine the exact content of the session |                                              |
| Landim, et al. <sup>51</sup> ; 2019; SSc | Home-based self-management program (Hands on-a hand care guide in SSc) | Improve hand pain and hand function | The program consisted of a booklet (written in simple language) and a DVD with hand exercises. Patients were instructed to practice the exercises daily, as a routine. In case of pain or discomfort when performing any of the exercises, they were advised to stop doing it and to contact the researchers.<br><br>Content:<br>Recommendations: (1) Managing Raynaud phenomenon, (2) Maintaining well-hydrated skin, (3) Preventing digestive discomfort, (4) Treating dry mouth, (5) Maintaining oral health, (6) Avoiding fatigue, and (7) Physical activity.<br>Hand exercises: (1) Active finger flexion and extension, (2) Wrist flexion stretch, (3) Wrist extension stretch, (4) Active wrist flexion, (5) Active wrist extension, (6) Active forearm pronation and supination, (7) Finger flexion stretching, (8) Finger extension stretching, (9) Opening of the first commissure, and (10) Active finger pinch. | Self-administered                                                                                                                                                                                                                                          | No tailoring.                                                                                          | Adherence was not determined in the project. |
| Landim, et al. <sup>52</sup> ; 2020; SSc | Home-based self-management programme (same                             | Same as in Landim, et al. 51        | Same as in Landim, et al. 51                                                                                                                                                                                                                                                                                                                                                                                                                                                                                                                                                                                                                                                                                                                                                                                                                                                                                                | Same as in Landim, et al. 51                                                                                                                                                                                                                               | Same as in Landim, et al. 51                                                                           | Same as in Landim, et al. 51                 |

| Authors, Year, Diagnoses            | Item 1: Brief name                                                 | Item 2: Why                                                               | Item 3, 4, 6, 7, 8, 10:<br>What (materials, procedures)<br>How<br>Where<br>How much<br>Modification                                                                                                                                                                                                                                                                                                                                                                                                                                                                                                                                                                                                                                                                                                                                                                                                                                                                                                                            | Item 5: Who (provided) | Item 9: Tailoring                                     | Item 11, 12:<br>How well (planned, actual)                                                                                                                                                               |
|-------------------------------------|--------------------------------------------------------------------|---------------------------------------------------------------------------|--------------------------------------------------------------------------------------------------------------------------------------------------------------------------------------------------------------------------------------------------------------------------------------------------------------------------------------------------------------------------------------------------------------------------------------------------------------------------------------------------------------------------------------------------------------------------------------------------------------------------------------------------------------------------------------------------------------------------------------------------------------------------------------------------------------------------------------------------------------------------------------------------------------------------------------------------------------------------------------------------------------------------------|------------------------|-------------------------------------------------------|----------------------------------------------------------------------------------------------------------------------------------------------------------------------------------------------------------|
|                                     | as in Landim, et al. 51)                                           |                                                                           |                                                                                                                                                                                                                                                                                                                                                                                                                                                                                                                                                                                                                                                                                                                                                                                                                                                                                                                                                                                                                                |                        |                                                       |                                                                                                                                                                                                          |
| Li, et al. 53; 2020; SLE            | Physical Activity Counselling Program with Use of Wearable Tracker | Increase time spent in moderate/vigorous physical activity                | 8-week intervention included 3 components:<br>1) an in-person session with 20 minutes (mins) of group education and 30 minutes of individual counselling with a PT. Focus: benefits of being physically active, how to be active without aggravating symptoms, and pain management, PTs guided participants to set goals, develop an action plan, and identify barriers and solutions<br>2) use of a Fitbit Flex-2 with account access in the company website (tailored to participant's goal, the PT then set the physical activity parameters on FitViz, included 1) the upper and lower bound of intensity and duration, 2) the upper limit of time in continuous sedentary behaviour, and 3) the rest time between sessions3).<br>3) 4 bi-weekly phone calls (20-30 mins) from a PT, reviewing participants' progress remotely on FitViz and counselled them to modify activity goals.                                                                                                                                     | Physiotherapist        | Intervention was tailored to the patient's condition. | Average intervention adherence in the Immediate Group was 98.3% for the education session attendance, 88.1% for the PT phone calls, and 83.1% for Fitbit use (Table 5). 78% met all 3 fidelity criteria. |
| Maddali-Bongi, et al. 54; 2011; SSc | Manual lymph drainage (MLD)                                        | Reducing edema, increasing functionality of the hands and quality of life | Manual lymph drainage (Vodder method)<br>Setting: sessions were performed in both upper extremities, starting from the less edematous side, for 60 minutes, once a week for 5 weeks.<br>Content/Structure: first at the "terminus" (the triangular area at the base of the neck, above the clavicles, where the lymph returns to the circulatory system by flowing into the subclavian veins) with light massage strokes, secondly the neck and head lymphatic skin vessels and lymph nodes were massaged; subsequently, the axillary lymph nodes were treated and a light massage was directed from the proximal site of the arm to the wrist, following a centrifugal direction in the upper extremity, with the aim of opening the lymphatic vessels. The treatment was performed by stimulating sequentially the lymphatic vessels of the arm, elbow, forearm, and wrist. This procedure was followed by the treatment of the dorsal and, then, of the palmar side of the hand and fingers. Afterward, the upper extremity | Trained operator       | No tailoring                                          | No information                                                                                                                                                                                           |

| Authors, Year, Diagnoses                        | Item 1: Brief name                                                         | Item 2: Why                                                           | Item 3, 4, 6, 7, 8, 10:<br>What (materials, procedures)<br>How<br>Where<br>How much<br>Modification                                                                                                                                                                                                                                                                                                                                                                                                                                                                                                                                                                                                                                                                                                                                                                                                                                                                                                                                                                                                                                                                            | Item 5: Who (provided) | Item 9: Tailoring                                                      | Item 11, 12:<br>How well (planned, actual) |
|-------------------------------------------------|----------------------------------------------------------------------------|-----------------------------------------------------------------------|--------------------------------------------------------------------------------------------------------------------------------------------------------------------------------------------------------------------------------------------------------------------------------------------------------------------------------------------------------------------------------------------------------------------------------------------------------------------------------------------------------------------------------------------------------------------------------------------------------------------------------------------------------------------------------------------------------------------------------------------------------------------------------------------------------------------------------------------------------------------------------------------------------------------------------------------------------------------------------------------------------------------------------------------------------------------------------------------------------------------------------------------------------------------------------|------------------------|------------------------------------------------------------------------|--------------------------------------------|
|                                                 |                                                                            |                                                                       | was treated in a centripetal direction by massaging the lymph nodes of the wrist, elbow, and axilla, and reaching again to the neck, with the aim of draining the content of the lymphatic vessels into the circulatory system.                                                                                                                                                                                                                                                                                                                                                                                                                                                                                                                                                                                                                                                                                                                                                                                                                                                                                                                                                |                        |                                                                        |                                            |
| Maddali-Bongi, et al. <sup>55</sup> ; 2009; SSc | Combination of connective tissue massage and Mc Mennell joint manipulation | Improve hand function                                                 | <p>Connective tissue massage and Mc Mennell joint manipulation<br/>Setting: 9 weeks, twice a week, 1 h per session and home daily exercises.</p> <p>Connective tissue massage: brief examination of both upper limbs to control the presence of Raynaud phenomenon and ulcers, the treatment starts with the massage of forearm and hand lasting about 10 min per limb. If necessary, after Mc Mennell manipulations, other 5 min of massage can be performed.</p> <p>Mc Mennell joint manipulation: starts with wrist manipulations on frontal and radial side diastasis and continues with the manipulations of the MCP and finally of the interphalangeal joints lasting 15 min per side.</p> <p>Programme of home daily exercises: one session/day (lasting 20 min) of active exercises for the hand, consisting in movements of the fingers and fine movements of the hand like flexion and extension of the single fingers, adduction and abduction of the fingers, terminal and subterminal pinches with all fingers in opposition to thumb, movements of flexion, extension, ulnar and radial deviation of the wrist and pronation and supination of the forearms.</p> | No information.        | No tailoring.                                                          | No information.                            |
| Maddali-Bongi, et al. <sup>56</sup> ; 2009; SSc | District specific and global rehabilitation program                        | Patients' global health condition and their hand and face involvement | <p>9-week rehabilitation program, district specific techniques for hands and face involvement and with a global technique:</p> <ol style="list-style-type: none"> <li>1. Hand involvement: combination of connective tissue massage and Mc Mennell joint manipulation (1 hour/session, twice a week). Patients with edematous hands were also treated with supplementary sessions of manual lymphatic drainage (1 hour/session, twice a week).</li> <li>2. Face involvement: combination of Kabat's method, connective tissue massage and kinesitherapy was used (1 hour/session, twice a week).</li> </ol>                                                                                                                                                                                                                                                                                                                                                                                                                                                                                                                                                                    | Physiotherapist        | Individualized for each patient according to clinical characteristics. | No information.                            |

| Authors, Year, Diagnoses                        | Item 1: Brief name                                                     | Item 2: Why                       | Item 3, 4, 6, 7, 8, 10:<br>What (materials, procedures)<br>How<br>Where<br>How much<br>Modification                                                                                                                                                                                                                                                                                                                                                                                                                                                                                                                                                                                                                                                                                                                                                                                                                                                                                                                                                                                                                                                                                                   | Item 5: Who (provided)                                                            | Item 9: Tailoring                                | Item 11, 12:<br>How well (planned, actual)                   |
|-------------------------------------------------|------------------------------------------------------------------------|-----------------------------------|-------------------------------------------------------------------------------------------------------------------------------------------------------------------------------------------------------------------------------------------------------------------------------------------------------------------------------------------------------------------------------------------------------------------------------------------------------------------------------------------------------------------------------------------------------------------------------------------------------------------------------------------------------------------------------------------------------------------------------------------------------------------------------------------------------------------------------------------------------------------------------------------------------------------------------------------------------------------------------------------------------------------------------------------------------------------------------------------------------------------------------------------------------------------------------------------------------|-----------------------------------------------------------------------------------|--------------------------------------------------|--------------------------------------------------------------|
|                                                 |                                                                        |                                   | 3.Global rehabilitation programs: included Hydrokinesytherapy, performed by SSc patients without ulcers. Patients with ulcers were assigned to a land-based rehabilitation. In both cases, patients performed respiratory rehabilitation exercises (1 hour/session, once a week). More detailed description in the article.                                                                                                                                                                                                                                                                                                                                                                                                                                                                                                                                                                                                                                                                                                                                                                                                                                                                           |                                                                                   |                                                  |                                                              |
| Maddali-Bongi, et al. <sup>57</sup> ; 2010; SSc | Combination of Kabat's technique, connective massage and kinesitherapy | Improve mouth-opening,<br>1) Face | Frequency: 9 weeks twice a week (each session lasting 1 h) combined<br>Sturcture: connective tissue massage first 10 min, Kabat's method 15 min and kinesitherapy 15 min; remaining 20 min relaxing exercise;<br><br>home program of mimic exercises:<br>patients were instructed to perform daily mouth stretching and opening exercises, and grimacing exercises for mimic muscles; three sequences.<br><b>First sequence</b> (at least 5 min, 3 times/day): patient placed thumbs into the mouth in order to enlarge the oral angles, movements were done bilaterally and simultaneously.<br><b>Second sequence</b> (once a day): patient inserted a number (as high as possible) of tongue depressors between the premolars of one arch toward the molars of the contralateral one to properly open the mouth. The tongue depressors should be maintained for a minimum of 8 min and, after a stop, the exercise should be repeated, if possible, for additional 8 min, by increasing the number of tongue depressors (modified from 6 to 12).<br><b>third sequence</b> : consisted in mimic exercises to be performed once a day, based on a series of grimaces to exercise (oro)facial muscles. | Physiotherapist                                                                   | No information.                                  | No information.                                              |
| Maisiak, et al. <sup>58</sup> ; 1996; SLE       | Telephone-based counselling intervention                               | Improving psychological status    | counselled exclusively by telephone, every 4 to 6 weeks over a 6-month period. The initial counseling session lasted approximately 30 minutes and subsequent sessions lasted 15 to 30 minutes.                                                                                                                                                                                                                                                                                                                                                                                                                                                                                                                                                                                                                                                                                                                                                                                                                                                                                                                                                                                                        | Counselors had a Master's degree in counselling.<br>Counselors had been diagnosed | Content was tailored to the needs of the people. | Some of the specific medically related topics that tended to |

| Authors,<br>Year,<br>Diagnoses              | Item 1: Brief name                 | Item 2: Why                                          | Item 3, 4, 6, 7, 8, 10:<br>What (materials, procedures)<br>How<br>Where<br>How much<br>Modification                                                                                                                                                                                                                                                                                                                                                                      | Item 5: Who<br>(provided)                                                                          | Item 9: Tailoring                                   | Item 11, 12:<br>How well<br>(planned,<br>actual)                                                                                                                                                                                                          |
|---------------------------------------------|------------------------------------|------------------------------------------------------|--------------------------------------------------------------------------------------------------------------------------------------------------------------------------------------------------------------------------------------------------------------------------------------------------------------------------------------------------------------------------------------------------------------------------------------------------------------------------|----------------------------------------------------------------------------------------------------|-----------------------------------------------------|-----------------------------------------------------------------------------------------------------------------------------------------------------------------------------------------------------------------------------------------------------------|
|                                             |                                    |                                                      | Goal was to reduce anxiety and depression by helping the clients explore their emotional concerns regarding their illness and recognize blocks to personal growth., counselling tended to be nondirective and reflective, meaning counsellor helped the clients search and find their own solutions. The techniques used: active and passive listening, accurate reflection of thoughts and feelings, clarification, summarization, confrontation, and open-ended leads. | having RA respectively ankylosing spondylitis as well as other non-rheumatologic chronic diseases. |                                                     | be discussed were the patient's last visit with the doctor, how to reach the physician, medication compliance, and coping with symptoms.                                                                                                                  |
| Mancuso and Poole <sup>59</sup> ; 2009; SSc | Paraffin and active hand exercises | Improve activity and participation                   | Frequency: 20-minute paraffin bath, followed by hand exercises five days per week for eight weeks.<br>Content exercises: flexion of the MCP joints, extension of the PIP joints, and thumb abduction. Participants held each exercise for 3-5 seconds with five repetitions. Participants were given a paraffin unit for use in their homes, and were responsible for completing both interventions.                                                                     | Occupational therapist                                                                             | No tailoring                                        | To reinforce the program and answer questions, researchers contacted participants weekly. To monitor compliance, participants were asked to keep a diary of participation. Participants reported 100% compliance with the interventions in their diaries. |
| Martin <sup>60</sup> ; 2009; SSc            | Myofascial release (MR)            | Improve the functionality of temporomandibular joint | Materials: Clinical Physiotherapeutic Assessment form, massage therapy table, camera, standard goniometer, 160mm caliper, and standard measuring tape with cm and mm markings.                                                                                                                                                                                                                                                                                           | Physiotherapist                                                                                    | Intervention was done because her individual needs. | No information.                                                                                                                                                                                                                                           |



| Authors, Year, Diagnoses                                                          | Item 1: Brief name                                                             | Item 2: Why                                | Item 3, 4, 6, 7, 8, 10:<br>What (materials, procedures)<br>How<br>Where<br>How much<br>Modification                                                                                                                                                                                                                                                                                                                                                                                                                                                                                                                                                                                                                                                                  | Item 5: Who (provided)                                                                           | Item 9: Tailoring                                              | Item 11, 12:<br>How well (planned, actual)                                                                                                                                |
|-----------------------------------------------------------------------------------|--------------------------------------------------------------------------------|--------------------------------------------|----------------------------------------------------------------------------------------------------------------------------------------------------------------------------------------------------------------------------------------------------------------------------------------------------------------------------------------------------------------------------------------------------------------------------------------------------------------------------------------------------------------------------------------------------------------------------------------------------------------------------------------------------------------------------------------------------------------------------------------------------------------------|--------------------------------------------------------------------------------------------------|----------------------------------------------------------------|---------------------------------------------------------------------------------------------------------------------------------------------------------------------------|
|                                                                                   |                                                                                |                                            | How: 20 MR sessions, each lasting 60 min, once a week, 10 sessions focused on neck and head (5), and right upper limb (RUL) (5), particularly the forearm and hand. Nine other sessions focused on the body as a whole, especially the patient's median plane. Then, after a break of 110 days, one session focused again head and RUL.                                                                                                                                                                                                                                                                                                                                                                                                                              |                                                                                                  |                                                                |                                                                                                                                                                           |
| McNearney, et al. <sup>61</sup> ; 2013; SSc                                       | Transcutaneous electrical nerve stimulation (TENS)                             | Improve neurogastric functioning           | 30 min TENS treatment >10Hz at GI acupuncture points PC6 and ST36, once (acute TENS) and then after two weeks of TENS sessions for 30 min twice daily (prolonged TENS); two-channel TENS electrodes applied bilaterally to PC6 and ST36 GI acupoints.<br><br>First visit: The electrical stimulus consisted of pulse trains; 12/min and 2 sec, respectively and pulses in each train had a frequency of 25 Hz; amplitude range of 2–10 mA, and was based on patient tolerance. At the end of the first visit, patients were trained in the operation of the unit and lead placement of the TENS electrodes for home use<br><br>Days 2-14: the patients performed TENS at home twice a day for 30 minutes each, preprandially, before breakfast and the evening meal. | No information                                                                                   | Amplitude range of 2–10 mA, and was based on patient tolerance | Patients filled out a daily log to report their TENS use and were contacted by phone after the first seven days to confirm their use and correct placement of TENS leads. |
| Miljeteig and Graue <sup>62</sup> ; 2009; SLE                                     | Educational program                                                            | Improve pain, fatigue, and quality of life | Education: patients learn about their disease and possible treatment to help them cope with daily living.<br>Information: about the multidisciplinary team and the ways that patients can contribute.<br>Coaching/Counselling: how patients can manage the disease better and achieve better physical and psychosocial health.                                                                                                                                                                                                                                                                                                                                                                                                                                       | Designed with health professionals as moderators (physician, therapist, social worker, or nurse) | Active participation, discussion and coaching from patients    | No information.                                                                                                                                                           |
| Mitropoulos, et al. <sup>63</sup> ; Mitropoulos, et al. <sup>64</sup> ; 2019; SSc | High-intensity interval training (HIIT) combined with resistance training (RT) | Improve microvascular function             | The HIIT protocol was described in Mitropoulos, et al. <sup>65</sup> . The RT exercises consisted of 1) chest press with dumbbells on a 30° inclined bench, 2) arms lateral raise with dumbbells in a seated position, 3) biceps curl with dumbbells, 4) triceps extension on the pulley from a standing position and, 5) handgrip dynamometer.                                                                                                                                                                                                                                                                                                                                                                                                                      | No information                                                                                   | Intervention was tailored to the patient's condition.          | We used our 'Six Pillars of Adherence' framework (based upon 'social support',                                                                                            |

| Authors, Year, Diagnoses                      | Item 1: Brief name                                          | Item 2: Why                                         | Item 3, 4, 6, 7, 8, 10:<br>What (materials, procedures)<br>How<br>Where<br>How much<br>Modification                                                                                                                                                                                                                                                                                                                                                                                                                                                                                                                                                                                                                                                  | Item 5: Who (provided) | Item 9: Tailoring                                                                                                 | Item 11, 12:<br>How well (planned, actual)                                                                                                                |
|-----------------------------------------------|-------------------------------------------------------------|-----------------------------------------------------|------------------------------------------------------------------------------------------------------------------------------------------------------------------------------------------------------------------------------------------------------------------------------------------------------------------------------------------------------------------------------------------------------------------------------------------------------------------------------------------------------------------------------------------------------------------------------------------------------------------------------------------------------------------------------------------------------------------------------------------------------|------------------------|-------------------------------------------------------------------------------------------------------------------|-----------------------------------------------------------------------------------------------------------------------------------------------------------|
|                                               |                                                             |                                                     |                                                                                                                                                                                                                                                                                                                                                                                                                                                                                                                                                                                                                                                                                                                                                      |                        |                                                                                                                   | 'education', 'reachability', 'small groups intervention implementation', 'reminders', and 'simplicity' to support patients to adhere to the intervention. |
| Mitropoulos, et al. <sup>65</sup> ; 2018; SSC | High-intensity interval training (cycling and arm cranking) | To improve the microcirculation of the digital area | 12-weeks, twice per week; 5 min warm-up on an arm crank or cycle ergometer, a 5 min cool-down period (lower- and upper-limb light intensity aerobic exercise and light stretching). Cycling and Arm cranking: exercise session on a cycle ergometer/an arm crank ergometer, high intensity interval training for 30 minutes (30s 100% PPO/ 30s passive recovery)                                                                                                                                                                                                                                                                                                                                                                                     | No information         | Tailored to the patient's condition.                                                                              | No information                                                                                                                                            |
| Mouthon and Thombs <sup>66</sup> ; 2020; SSC  | SPIN-HAND Program                                           | Difference in Cochin Hand Function Scale            | Internet-based SPIN-HAND program consists of 4 modules (1) Thumb Flexibility and Strength (3 exercises); (2) Finger Bending (3 exercises); (3) Finger Extension (3 exercises); and (4) Wrist Flexibility and Strength (2 exercises). The program includes sections on developing a personalized program, goal-setting strategies and examples, progress tracking, sharing goals and progress with friends and family, and patient stories of experiences with hand disability and hand exercises. Instructional videos demonstrate and explain how to perform each exercise properly with pictures to illustrate common mistakes. Separate versions of each exercise are available for patients with mild/moderate and more severe hand involvement. | No information         | Separate versions of each exercise are available for patients with mild/moderate and more severe hand involvement | No information                                                                                                                                            |
| Mugij, et al. <sup>67</sup> ; 2006; SSC       | Self-administered stretching of each finger                 | Improve functionality                               | Occupational therapist coached the patients on a home program for stretching, which is a self-administered exercise. Home program for stretching, which is a self-administered exercise: Individual fingers were maintained in a stretched position using the opposite hand for 10 s, and this was repeated                                                                                                                                                                                                                                                                                                                                                                                                                                          | Occupational therapist | No tailoring.                                                                                                     | No information.                                                                                                                                           |

| Authors, Year, Diagnoses                 | Item 1: Brief name                          | Item 2: Why                               | Item 3, 4, 6, 7, 8, 10:<br>What (materials, procedures)<br>How<br>Where<br>How much<br>Modification                                                                                                                                                                                                                                                                                                                                                                                                                                                                                                                                                                                                                                               | Item 5: Who (provided)                                                                                            | Item 9: Tailoring                                                                          | Item 11, 12:<br>How well (planned, actual)                                                                                                                                                                                |
|------------------------------------------|---------------------------------------------|-------------------------------------------|---------------------------------------------------------------------------------------------------------------------------------------------------------------------------------------------------------------------------------------------------------------------------------------------------------------------------------------------------------------------------------------------------------------------------------------------------------------------------------------------------------------------------------------------------------------------------------------------------------------------------------------------------------------------------------------------------------------------------------------------------|-------------------------------------------------------------------------------------------------------------------|--------------------------------------------------------------------------------------------|---------------------------------------------------------------------------------------------------------------------------------------------------------------------------------------------------------------------------|
|                                          |                                             |                                           | 3–10 times. Frequency: once per day. The exercise was performed carefully if aches occurred due to inflammation or skin ulcers. Since self-exercise was difficult for patients with severe contracture restrictions to perform, instructions were given to family members on behalf of the patient instead. The therapist confirmed whether the exercise was correctly performed every month, when the patient visited our hospital for treatment of SSc.                                                                                                                                                                                                                                                                                         |                                                                                                                   |                                                                                            |                                                                                                                                                                                                                           |
| Mugji, et al. <sup>68</sup> ; 2018; SSc  | Self-administered stretching of each finger | Improve functionality                     | Same stretching as Mugji, et al. <sup>67</sup> . regular check-ups occurred every one or two months, or at least every 6 months (within the 9 years)                                                                                                                                                                                                                                                                                                                                                                                                                                                                                                                                                                                              | Occupational therapist                                                                                            | No tailoring.                                                                              | No information.                                                                                                                                                                                                           |
| Murphy <sup>69</sup> ; 2019; SSc         | Intensive treatment                         | Improve arm function                      | 8 sessions; interventions includes various thermal modalities, manual therapy, Physiotouch and education. Home app involves 1 session of education with the OT. The App consists of videos depicting each exercise and ability to track adherence to exercises.                                                                                                                                                                                                                                                                                                                                                                                                                                                                                   | Occupational therapist, Home App                                                                                  | Therapy service are provided as appropriate                                                | No information                                                                                                                                                                                                            |
| Murphy, et al. <sup>70</sup> ; 2018; SSc | Occupational therapy                        | Improve extremity function (contractures) | <b>Preparation for treatment:</b> Thermal modalities (such as Hot packs, focused on areas with limitations Paraffin, focused on digital limitations)<br><b>Tissue mobilization:</b> PhysioTouch, applied proximal to distal in areas with pathological skin in sections<br><b>Arm mobility:</b> <u>Passive ROM exercises</u> (hold end position of joint for 3–10 seconds [dependent on skin and joint integrity]; repeat for each affected joint/digit) and <u>active ROM exercises</u> (Functional activities [manual dexterity activities such as working with small foam cubes or jar openers, or rolling putty])<br><b>At-home ROM exercises:</b> Tailored active and passive ROM exercises based on limitations in upper extremity mobility | Occupational therapist (certified hand therapist with >30 years of experience treating patients with scleroderma) | Tailored active and passive ROM exercises based on limitations in upper extremity mobility | Did not formally assess adherence; long-term adherence to the home exercise program was poor, participants who did adhere to the daily home exercises had better effects over time compared with those who did not adhere |

| Authors, Year, Diagnoses                              | Item 1: Brief name                    | Item 2: Why                          | Item 3, 4, 6, 7, 8, 10:<br>What (materials, procedures)<br>How<br>Where<br>How much<br>Modification                                                                                                                                                                                                                                                                                                                                                                                                                                                                                                                                                                                                                                                                                                                                                                                                                                                                                                                                                                                                                                      | Item 5: Who (provided)                       | Item 9: Tailoring                                             | Item 11, 12:<br>How well (planned, actual) |
|-------------------------------------------------------|---------------------------------------|--------------------------------------|------------------------------------------------------------------------------------------------------------------------------------------------------------------------------------------------------------------------------------------------------------------------------------------------------------------------------------------------------------------------------------------------------------------------------------------------------------------------------------------------------------------------------------------------------------------------------------------------------------------------------------------------------------------------------------------------------------------------------------------------------------------------------------------------------------------------------------------------------------------------------------------------------------------------------------------------------------------------------------------------------------------------------------------------------------------------------------------------------------------------------------------|----------------------------------------------|---------------------------------------------------------------|--------------------------------------------|
| Navarrete-Navarrete, et al. <sup>71</sup> ; 2010; SLE | Cognitive-behavioural intervention    | Stress reduction                     | Stress Management Program; 10 weekly group meetings lasting 1.5 or 2 h, groups of 7–9 patients; Structure and elements: introduction to the session, discussion of homework, group discussion and the development of new coping skills. The sessions dealt with the following: (1) Concept of stress; (2) Cognitive restructuring – main errors in thinking; (3) Cognitive restructuring – main central beliefs; (4) Cognitive restructuring – challenging thoughts; (5) Alternative thought control strategies – self-instructional training and thought stopping; (6) Relaxation techniques – diaphragm breathing and deep muscle relaxation (the short circuits); (7) An approach to controlling pain oneself; (8) Training in social skills – assertiveness techniques and basic assertive rights; (9) Training in social skills – how to say no without feeling bad, asking another person to change their behaviour, and (10) Humour and optimism as coping strategies.                                                                                                                                                            | Psychologists, Rheumatologist/Physician      | No information.                                               | No information.                            |
| Naylor <sup>72</sup> ; 1982; SSc                      | Oral augmentation program (exercises) | Improve mastication and oral hygiene | Frequency: daily for 5 to 7 minutes<br><br>Content: oral augmentation program consisted of cheek and mouth stretching; performed cheek-stretching exercises by placing the thumb of the right hand in her mouth and stretching the left cheek laterally as far as possible. The process was repeated several times and then the patient was asked to switch hands and repeat the exercise on the right side. After three sets of five stretches on each side she was instructed to perform the movements bilaterally and simultaneously. The final exercise used a bundle of tongue depressors held together by an elastic band. The actual size of the initial bundle should be such that it can be readily placed in the patient's mouth and extend from the premolar area on one side of the arch to the molar region on the opposite side. The bottom and top blades should gently contact the occlusal surface of the distal molars or premolars. By placing the bundle diagonally across the arch, the patient avoids the weaker, single-rooted anterior teeth and directs the forces to the stronger multirooted posterior teeth. | Not clearly stated (Dentist/Physiotherapist) | Intervention was tailored to the patients physical condition. | No information.                            |

| Authors, Year, Diagnoses                     | Item 1: Brief name                            | Item 2: Why                 | Item 3, 4, 6, 7, 8, 10:<br>What (materials, procedures)<br>How<br>Where<br>How much<br>Modification                                                                                                                                                                                                                                                                                                                                                                                                                                                                                                                                                                                                                                                                                                                                                                                                                                                                                                                                                                                                                                                                                                                                                                                                                       | Item 5: Who (provided) | Item 9: Tailoring | Item 11, 12:<br>How well (planned, actual)                                                                                                                                                                                 |
|----------------------------------------------|-----------------------------------------------|-----------------------------|---------------------------------------------------------------------------------------------------------------------------------------------------------------------------------------------------------------------------------------------------------------------------------------------------------------------------------------------------------------------------------------------------------------------------------------------------------------------------------------------------------------------------------------------------------------------------------------------------------------------------------------------------------------------------------------------------------------------------------------------------------------------------------------------------------------------------------------------------------------------------------------------------------------------------------------------------------------------------------------------------------------------------------------------------------------------------------------------------------------------------------------------------------------------------------------------------------------------------------------------------------------------------------------------------------------------------|------------------------|-------------------|----------------------------------------------------------------------------------------------------------------------------------------------------------------------------------------------------------------------------|
| Naylor, et al.<br><sup>73</sup> ; 1984; SSC  | Comparison of two different exercise programs | Improve oral opening        | <p>IG: three mouth-stretching exercises and a new oral augmentation exercise, using tongue depressors<br/>           CG: six "facial grimacing" exercises performed in three sets of five stretches and including the following instructions: open mouth as wide as possible, open mouth as wide as possible and pull mandible down, purse lips, puff out cheeks, make an exaggerated smile, move mandible to left, right, down, and forward (range of motion).</p> <p>Mouth-stretching exercises: place the right thumb inside the corner of the mouth on the left side and stretched laterally as far as possible, switched hands, and then stretched the right side of the mouth before placing both thumbs in the mouth at the same time; three sets of five stretches were performed.<br/>           Oral augmentation exercise: inserting tongue depressors between the teeth from the left premolar area to the right molar region. Additional depressors were added to prop open the mouth and stretch the sclerosed facial skin and musculature and held for several minutes. Patients were instructed to stop, rest, and repeat the exercise before recording the number of tongue blades used for that session. Patients were encouraged to increase the number of tongue depressors as often as possible.</p> | Dentist                | No tailoring      | Persons in the experimental group were instructed to exercise regularly and then were re-examined at the 6-month meeting to evaluate their levels of compliance with the recommended Program when not monitored regularly. |
| Neville, et al.<br><sup>74</sup> ; 2016; SLE | Lupus Interactive Navigator (LIN)             | To increase self-management | <p>Web based program to provide education and to support self-management in persons with SLE. Topics:<br/>           About Lupus (What Causes Lupus?, Lupus &amp; the Immune System, A Lupus Diagnosis, Prognosis, Flares and Remissions, Lupus &amp; The Body, FAQs/ Myths)<br/>           Symptom Management &amp; Treatments (Symptoms of Lupus, Medications to Treat Lupus, Side Effects of Medications, Preventing and Managing Flares, Monitoring Your Lupus, Complementary Therapies, Other Therapies, Clinical Trials)<br/>           Accessing Healthcare (Your Care Team, Communicating with Your Care Team, Covering Medical Costs, Transitioning From Pediatric to Adult Care, Accessing Care in Rural Areas)</p>                                                                                                                                                                                                                                                                                                                                                                                                                                                                                                                                                                                             | Web-based              | n.a.              | Number of log-ins, duration of each session,                                                                                                                                                                               |

| Authors, Year, Diagnoses                    | Item 1: Brief name                               | Item 2: Why                                                                                     | Item 3, 4, 6, 7, 8, 10:<br>What (materials, procedures)<br>How<br>Where<br>How much<br>Modification                                                                                                                                                                                                                                                                                                                                                                                                                                                                                                                                                                                                                                                                                                                                                                                                                                                                            | Item 5: Who (provided)                                            | Item 9: Tailoring                                                            | Item 11, 12:<br>How well (planned, actual) |
|---------------------------------------------|--------------------------------------------------|-------------------------------------------------------------------------------------------------|--------------------------------------------------------------------------------------------------------------------------------------------------------------------------------------------------------------------------------------------------------------------------------------------------------------------------------------------------------------------------------------------------------------------------------------------------------------------------------------------------------------------------------------------------------------------------------------------------------------------------------------------------------------------------------------------------------------------------------------------------------------------------------------------------------------------------------------------------------------------------------------------------------------------------------------------------------------------------------|-------------------------------------------------------------------|------------------------------------------------------------------------------|--------------------------------------------|
|                                             |                                                  |                                                                                                 | Support Services (Community Services search tool to locate available lupus- support resources in close proximity to the user's postal code)<br>Family, Friends & Work (Family & Lupus, Lupus & Work, Supporting Someone With Lupus, Resources for Family Members & Friends)<br>Living Well With Lupus (Managing Stress & Fatigue, Getting Enough Sleep, The Importance of Exercise, Depression, Overcoming the Emotional Hurdles of Lupus, Maintaining Healthy Diet, Vaccinations, Pregnancy & Lupus, Young People & Lupus)                                                                                                                                                                                                                                                                                                                                                                                                                                                    |                                                                   |                                                                              |                                            |
| Ng and Chan <sup>75</sup> ; 2007; SLE       | Group Psychosocial Program                       | Enhancing Psychological Well-Being                                                              | 6-week, 2.5-hour weekly session psychosocial group (eight to ten persons with SLE)<br>Goal: equip members with knowledge and skills to cope with SLE and stress arising from the illness, to enhance their self-confidence and develop a positive attitude toward the illness, and to enhance their social support network.<br>Content: Understanding SLE, Managing Frustration and Emotion, Identifying the Consequences of Negative Beliefs and Disputing the Beliefs, Breaking through Yourself and Developing Personal Strengths, Understanding One's Rights as a Patient, and Locating Community Resources for Rehabilitation.<br>session started with a warm-up game and a 30-minute mini-lecture adopting psychoeducational techniques such as providing information, teaching stress management, and demonstrating problem-solving skills, rest of the time therapeutic group interaction and support through simulation exercises and sharing among the participants. | Social worker                                                     | The content of the group sessions was tailored to the needs of these people. | No information.                            |
| O'Riordan, et al. <sup>76</sup> ; 2017; SLE | Fatigue and Activity Management Education (FAME) | To increase participants' understanding of SLE related fatigue and to facilitate development of | Overall aims of FAME are for participants to develop effective fatigue management strategies and increase their occupational participation.<br>Frequency 6 weeks, weekly session of 2.5 hours: one-hour group education and one-hour individual goal setting component with a 30-minute tea/coffee break.                                                                                                                                                                                                                                                                                                                                                                                                                                                                                                                                                                                                                                                                      | Led by an occupational therapist, included multidisciplinary team | Goal setting was tailored to the needs of the people.                        | Attendance-rate median 5, range 3-6.       |

| Authors, Year, Diagnoses                   | Item 1: Brief name                       | Item 2: Why                                                                | Item 3, 4, 6, 7, 8, 10:<br>What (materials, procedures)<br>How<br>Where<br>How much<br>Modification                                                                                                                                                                                                                                                                                                                                                                                                                                                                                                                                                                                                                                                                                                                                                                                                                                                                                                                                                                                                                                                                                                                                                                 | Item 5: Who (provided)                   | Item 9: Tailoring                                                                                                                                                                                                | Item 11, 12:<br>How well (planned, actual) |
|--------------------------------------------|------------------------------------------|----------------------------------------------------------------------------|---------------------------------------------------------------------------------------------------------------------------------------------------------------------------------------------------------------------------------------------------------------------------------------------------------------------------------------------------------------------------------------------------------------------------------------------------------------------------------------------------------------------------------------------------------------------------------------------------------------------------------------------------------------------------------------------------------------------------------------------------------------------------------------------------------------------------------------------------------------------------------------------------------------------------------------------------------------------------------------------------------------------------------------------------------------------------------------------------------------------------------------------------------------------------------------------------------------------------------------------------------------------|------------------------------------------|------------------------------------------------------------------------------------------------------------------------------------------------------------------------------------------------------------------|--------------------------------------------|
|                                            |                                          | strategies to decrease the impact of fatigue on occupational participation | Educational topics: fatigue management, pain management, exercise (delivered by a physiotherapist), joint protection, stress management, and nutrition (delivered by a dietician).<br>Goal setting: aimed to facilitate participants to implement learning gained during the educational session between the weekly sessions.                                                                                                                                                                                                                                                                                                                                                                                                                                                                                                                                                                                                                                                                                                                                                                                                                                                                                                                                       |                                          |                                                                                                                                                                                                                  |                                            |
| O'Connor, et al. <sup>77</sup> ; 2016; SSc | Osteopathic manipulative treatment (OMT) | Improve hand function, decrease pain, decrease dyspnea, improve fatigue    | Objectives of the OMT<br>1- Improve hand function by potentially releasing connective tissue (skin, subcutaneous tissues, fasciae, interosseous membrane, tendons, ligaments and joint capsules) tension and retraction, and muscle tension (in upper limbs, thorax and neck);<br>2- Decrease pain, possibly by relieving pressure on lymphatic, vascular and neurologic structures resulting from connective tissue and muscle tension or retraction <sup>17</sup> ;<br>3- Decrease dyspnea by potentially restoring better motion and function to the thoracic cage, diaphragm, and thoracic and cervical spine, thoracic inlet and intrathoracic tissues; and<br>4- Improve fatigue possibly through the previous objectives, and by addressing thoracic and diaphragmatic regions to promote lymphatic and arterial flow, and addressing upper thoracic spine, <sup>27</sup> the associated rib dysfunctions and the cranial base for potential effects on sympathetic/parasympathetic balance.<br><br>The following techniques were used: fascial, ligamentous, myofascial and soft tissue techniques, muscle energy techniques, cranial, visceral and lymphatic drainage techniques. A more detailed description is in the supplemental files of the article. | Osteopath with over 10 years' experience | Individual adaptations (order of the techniques and dosage) were possible if justified by the Participant's specific needs and response to OMT techniques, but the global structure of each session was similar. | No information.                            |
| Oliveira, et al. <sup>78</sup> ; 2009; SSc | Aerobic exercise                         | Improve aerobic capacity                                                   | Over 8 weeks, 40 min sessions, twice a week; 5 minutes warm-up period, where speed was progressively increased until target heart rate was reached. Last 5 minutes of exercise a cool down was performed, decreasing speed until full stop; first session, performed 15 min of aerobic exercise within the target heart rate, second session 20 min, 25 min in the third and 30 min in all                                                                                                                                                                                                                                                                                                                                                                                                                                                                                                                                                                                                                                                                                                                                                                                                                                                                          | No information.                          | The intensity was set individually at the HR of the patient.                                                                                                                                                     | Adherence rate of 100 %                    |

| Authors, Year, Diagnoses                    | Item 1: Brief name                      | Item 2: Why                                                 | Item 3, 4, 6, 7, 8, 10:<br>What (materials, procedures)<br>How<br>Where<br>How much<br>Modification                                                                                                                                                                                                                                                                                                                                                                                                                                                                                                                                                                                                                                                                                                                                                                                                                                                                                                                                                                                                                                                                                                                                                                                       | Item 5: Who (provided) | Item 9: Tailoring                                                                     | Item 11, 12:<br>How well (planned, actual) |
|---------------------------------------------|-----------------------------------------|-------------------------------------------------------------|-------------------------------------------------------------------------------------------------------------------------------------------------------------------------------------------------------------------------------------------------------------------------------------------------------------------------------------------------------------------------------------------------------------------------------------------------------------------------------------------------------------------------------------------------------------------------------------------------------------------------------------------------------------------------------------------------------------------------------------------------------------------------------------------------------------------------------------------------------------------------------------------------------------------------------------------------------------------------------------------------------------------------------------------------------------------------------------------------------------------------------------------------------------------------------------------------------------------------------------------------------------------------------------------|------------------------|---------------------------------------------------------------------------------------|--------------------------------------------|
|                                             |                                         |                                                             | subsequent sessions; intensity within anaerobic threshold and 10 % before Respiratory compensation point.                                                                                                                                                                                                                                                                                                                                                                                                                                                                                                                                                                                                                                                                                                                                                                                                                                                                                                                                                                                                                                                                                                                                                                                 |                        |                                                                                       |                                            |
| Parisi, et al. <sup>79</sup> ; 2017; SSC    | Neuromuscular Taping                    | Improving hand functioning                                  | <p>Cotton-based elastic adhesive and paper backed tape; applied in eccentric way; applied bilaterally, dorsal and palmar sided of the hand;</p> <p><b>Dorsal hand</b> application consisted of 5 tapes of 20-25 cm in length and 0.5-0.7 cm width applied over the dorsal aspect of the fingers and thumb, starting at the fingernail base and ending above the wrist, with the patient maintaining a clenched fist position with the wrist in flexion; if the patient could not hold a complete clenched fist then the skin has been passively stretched in the direction of the elbow during the tape application;</p> <p><b>Palmar side</b> of the hand the tape was applied using 5 tapes of 20-25 cm in length and 0.5-0.7 cm width positioned over the palmar aspect of the fingers and thumb, starting at the finger pad and ending above the wrist, with the patient maintaining the hand in opened position with the wrist in extension; also for this side if the patient could not hold a complete extension the skin has been passively stretched in the direction of the elbow during the tape application. For both side application, each tape has been positioned with 0% tension over the skin in a stretched position.</p> <p>Frequency: 2 times weekly for 4 weeks</p> | Physiotherapist        | No tailoring                                                                          | No information.                            |
| Perandini, et al. <sup>80</sup> ; 2014; SLE | 12-week exercise training program       | Improvement of cytokines and soluble TNF receptors (sTNFRs) | 12-week exercise training program, twice a week, supervised exercise training program in an intrahospital gymnasium. Content: training sessions consisted of a 5-min warm-up, followed by 30–50 min of treadmill walking, and a 5-min cooling-down period. The walking duration was gradually increased at every 4 weeks, from 30 to 50 min. The intensity of the exercise sessions was set at the HR correspondent to the interval between the VAT and 10% below the RCP.                                                                                                                                                                                                                                                                                                                                                                                                                                                                                                                                                                                                                                                                                                                                                                                                                | No information.        | The intensity of the exercise sessions was set individually at the HR of the patient. | No information.                            |
| Piga, et al. <sup>81</sup> ; 2014; SSC      | Recovery of Movement and Telemonitoring | Improve hand function                                       | Telemonitoring approach to self-managed kinesiotherapy session                                                                                                                                                                                                                                                                                                                                                                                                                                                                                                                                                                                                                                                                                                                                                                                                                                                                                                                                                                                                                                                                                                                                                                                                                            | Telemonitoring         | No tailoring.                                                                         | Adherence to protocol was defined as the   |



| Authors, Year, Diagnoses                | Item 1: Brief name                                                  | Item 2: Why                                               | Item 3, 4, 6, 7, 8, 10:<br>What (materials, procedures)<br>How<br>Where<br>How much<br>Modification                                                                                                                                                                                                                                                                                                                                                                                                                                                                                                                                                                                                                                                                                                                                                                     | Item 5: Who (provided)          | Item 9: Tailoring                                              | Item 11, 12:<br>How well (planned, actual)                              |
|-----------------------------------------|---------------------------------------------------------------------|-----------------------------------------------------------|-------------------------------------------------------------------------------------------------------------------------------------------------------------------------------------------------------------------------------------------------------------------------------------------------------------------------------------------------------------------------------------------------------------------------------------------------------------------------------------------------------------------------------------------------------------------------------------------------------------------------------------------------------------------------------------------------------------------------------------------------------------------------------------------------------------------------------------------------------------------------|---------------------------------|----------------------------------------------------------------|-------------------------------------------------------------------------|
|                                         | (Re.Mo.Te.)                                                         |                                                           | Strength exercises (described in detail in appendix 2 in the study): isometric muscle contraction, mobility exercises are low resistance or without resistance and performed at the maximum pain-free intensity; patients were taught how to perform the kinesiotherapy exercises, patients were trained to keep the wrist in a neutral position during the exercises, resting on a flat surface when possible.<br>Telemonitoring system: interface allows recognizing (1) The kinesiotherapeutic sessions performed by the patient; (2) The number of sets and repetitions performed for each exercise; (3) How the patient performed the exercises, providing statistics. The statistics are presented to the physician. The system offers a fast remote analysis of the home sessions, enabling identification of low adherence to the protocol or poor performance. |                                 |                                                                | percentage of complete workout sessions over those scheduled.           |
| Pinto, et al. <sup>82</sup> ; 2011; SSc | Supervised exercise Training Program                                | To improve muscle strength/function, and aerobic capacity | 12 weeks of supervised training twice a week; sessions consisted of a 5-minute treadmill warm-up followed by 30 minutes of resistance training, 20 minutes of treadmill aerobic training, and 5 minutes of stretching exercises.<br>Resistance training: 5 exercises for the main muscle groups: bench press, leg press, lat pull down, leg extension, and seated row; 4 sets of 8–12 repetition-maximum (RM) [first week only 2 sets of 15–20RM] for each exercise. Progression to greater resistance when patient could perform 12 or more repetitions<br>Aerobic training: intensity of approximately 70% of VO <sub>2</sub> peak.                                                                                                                                                                                                                                   | Fitness professional, physician | Progression of resistance, according to individual performance | No information                                                          |
| Pizzo, et al. <sup>83</sup> ; 2003; SSc | Exercise program (mouth-stretching and oral augmentation exercises) | Improve mouth opening                                     | Sitting in front of a mirror, place both thumbs into the mouth in order to enlarge the left and right oral angles; stretching movements are done bilaterally and simultaneously, for at least 15 min, twice per day, then insert a stick of soft wood (dimensions: 2×1.5×9.5 cm) between the teeth from the premolars of one arch towards the molars of the contralateral one, the stick was also rotated on the corner. The patient was also requested to push the stick, as much as possible, further                                                                                                                                                                                                                                                                                                                                                                 | Dentist                         | No tailoring.                                                  | Patients were evaluated every 2 weeks to check the levels of compliance |

| Authors, Year, Diagnoses                | Item 1: Brief name                                                 | Item 2: Why                              | Item 3, 4, 6, 7, 8, 10:<br>What (materials, procedures)<br>How<br>Where<br>How much<br>Modification                                                                                                                                                                                                                                                                                                                                                                                                                                                                                                                                                                                                                                                                                                                                                                                                                                                                                                                                                                                                                                                                           | Item 5: Who (provided)                              | Item 9: Tailoring               | Item 11, 12:<br>How well (planned, actual)                                                            |
|-----------------------------------------|--------------------------------------------------------------------|------------------------------------------|-------------------------------------------------------------------------------------------------------------------------------------------------------------------------------------------------------------------------------------------------------------------------------------------------------------------------------------------------------------------------------------------------------------------------------------------------------------------------------------------------------------------------------------------------------------------------------------------------------------------------------------------------------------------------------------------------------------------------------------------------------------------------------------------------------------------------------------------------------------------------------------------------------------------------------------------------------------------------------------------------------------------------------------------------------------------------------------------------------------------------------------------------------------------------------|-----------------------------------------------------|---------------------------------|-------------------------------------------------------------------------------------------------------|
|                                         |                                                                    |                                          | and further back towards the posterior teeth. This exercise was performed in the evening for a period of 18 weeks.                                                                                                                                                                                                                                                                                                                                                                                                                                                                                                                                                                                                                                                                                                                                                                                                                                                                                                                                                                                                                                                            |                                                     |                                 |                                                                                                       |
| Poole, et al. <sup>84</sup> ; 2013; SSc | Mail-delivered self-management program                             | Improve self-management                  | The program consisted of a workbook and exercise DVD that provided information on medical aspects of the disease, dysphagia, fatigue management, advocacy, activities of daily living, oral hygiene, skin and wound care, psychosocial changes, exercises, and other features of the condition.                                                                                                                                                                                                                                                                                                                                                                                                                                                                                                                                                                                                                                                                                                                                                                                                                                                                               | Mail-delivered                                      | No tailoring.                   | No information.                                                                                       |
| Poole, et al. <sup>85</sup> ; 2014; SSc | Interactive internet-based SSc self-management program             | Improve self-management                  | Same as <sup>84</sup> , translated into an internet format. Each of the modules featured written material, learning activities/action plans, and/or homework and forms to apply strategies. Questions were posted on a discussion board for each module. Participants were notified when questions were posted.                                                                                                                                                                                                                                                                                                                                                                                                                                                                                                                                                                                                                                                                                                                                                                                                                                                               | Internet based                                      | No tailoring.                   | No information.                                                                                       |
| Poole, et al. <sup>86</sup> ; 2010; SSc | Structured oral hygiene instructions and facial and hand exercises | Improve oral hygiene                     | Dental prophylaxis: scaling and root planning; education videotape on proper brushing and flossing; individual hygiene instructions to be used at home and a 6-month supply of dental products to each participant.<br>Occupational therapy: educational video on hand and facial and oral augmentation exercises; six exercises performed in three sets of five stretches, each held for 3–5 s: open mouth as wide as possible, pull mandible down, purse lips, puff out cheeks, make exaggerated smile, move mandible to left, right, down and forward; Oral stretching/augmentation exercises: right thumb in corner of the left side of the mouth and stretching, switching thumbs to stretch the right side of the mouth, and finally, stretching with both thumbs at the same time; inserting tongue depressors between the teeth from the left premolar area to the right molar region. For more details see Naylor, et al. <sup>73</sup> . Hand exercises consisted of making a fist, pressing the fingers flat against each other, and touching the thumb to the base of the little finger - performed in three sets of five stretches, held for 3–5 s, twice a day. | Registered dental hygienist, Occupational therapist | Individual hygiene instructions | Subjects were not contacted on a regular basis to ensure compliance with exercises or dental program. |
| Prado, et al. <sup>87</sup> ; 2013;     | Supervised moderate-intensity                                      | Improving the cardiorespiratory capacity | 12 weeks of twice weekly supervised moderate-intensity aerobic exercise training. Training sessions comprised a 5-minute warmup followed by 20 to 50 minutes of treadmill aerobic                                                                                                                                                                                                                                                                                                                                                                                                                                                                                                                                                                                                                                                                                                                                                                                                                                                                                                                                                                                             | Fitness professional and rheumatologist             | Aerobic training volume         | The exercise adherence rate                                                                           |

| Authors, Year, Diagnoses                         | Item 1: Brief name                                                    | Item 2: Why                                                                                           | Item 3, 4, 6, 7, 8, 10:<br>What (materials, procedures)<br>How<br>Where<br>How much<br>Modification                                                                                                                                                                                                                                                                                                                                                                                                                                                                                                                                                                                                                                                                                                                                                                                                                                                                                                                                                                                                                                                                                                                                                                                                                                                                                                                                                                                                         | Item 5: Who (provided)       | Item 9: Tailoring                                                                                                                                                                                                                                                                                                                                                             | Item 11, 12:<br>How well (planned, actual)                                      |
|--------------------------------------------------|-----------------------------------------------------------------------|-------------------------------------------------------------------------------------------------------|-------------------------------------------------------------------------------------------------------------------------------------------------------------------------------------------------------------------------------------------------------------------------------------------------------------------------------------------------------------------------------------------------------------------------------------------------------------------------------------------------------------------------------------------------------------------------------------------------------------------------------------------------------------------------------------------------------------------------------------------------------------------------------------------------------------------------------------------------------------------------------------------------------------------------------------------------------------------------------------------------------------------------------------------------------------------------------------------------------------------------------------------------------------------------------------------------------------------------------------------------------------------------------------------------------------------------------------------------------------------------------------------------------------------------------------------------------------------------------------------------------------|------------------------------|-------------------------------------------------------------------------------------------------------------------------------------------------------------------------------------------------------------------------------------------------------------------------------------------------------------------------------------------------------------------------------|---------------------------------------------------------------------------------|
| childhood onset SLE                              | aerobic exercise program                                              |                                                                                                       | training (a 10-minute increment in the aerobic training volume was applied every four weeks), and 5 minutes of cool down on the treadmill at a low speed followed by stretching exercises.                                                                                                                                                                                                                                                                                                                                                                                                                                                                                                                                                                                                                                                                                                                                                                                                                                                                                                                                                                                                                                                                                                                                                                                                                                                                                                                  | (monitoring adverse events)  |                                                                                                                                                                                                                                                                                                                                                                               | was 94.0 ± 7.03%.                                                               |
| Prado, et al. <sup>88</sup> ; 2011; juvenile SLE | Exercise training                                                     | To improve physical capacity and functioning                                                          | Training sessions twice a week: 5-min treadmill warm-up; 30- to 50-min treadmill aerobic training. Aerobic training intensity was monitored by an HR monitor (HR correspondent to the ventilatory anaerobic threshold (VAT)).                                                                                                                                                                                                                                                                                                                                                                                                                                                                                                                                                                                                                                                                                                                                                                                                                                                                                                                                                                                                                                                                                                                                                                                                                                                                               | Fitness professionals        | Tailored to the patients HR.                                                                                                                                                                                                                                                                                                                                                  | No information.                                                                 |
| Ramsey-Goldman, et al. <sup>89</sup> , 2000; SLE | Aerobic exercise (AER), range of motion/muscle strengthening (ROM/MS) | Efficacy and safety of different exercise therapies on patient-reported fatigue and functional status | <p>AER: <i>Phase I</i> (2month): pat received an exercise prescription which specified types of activities allowed, intensity and duration of each activity, and total duration of the exercise session. Exercise to 70-80% of max heart rate. Each exercise session began with a 5-10min warm-up, followed by 20-30minutes of aerobic activity, and concluded with a 5-10min cool-down period. Met for 50 min 3 times per week. <i>Phase II</i>: continued supervised for the first month and then in an unsupervised home exercise for 6 months- prescription similar to the supervised sessions. Pat were instructed to take their pulse, keep logs of their exercise duration, max. heartrate and symptoms experienced during exercise. Monitored by telephone and exercise logs.</p> <p>ROM: <i>Phase I</i> (2month): exercise program limited to isolate upper and lower extremity joint range of motion as well as to limb movement patterns. 3 times a week for 50-min session.</p> <p><i>Phase II</i>: muscle strengthening was added to the ROM exercise. Session began with stretching, proceeded to the isometric and progressive resistive exercises, and ended with gentle stretching. Typical stretching: 2-3 sets, 10 repetitive isotonic contractions per muscle group using increasing weights from 1-2 pounds. Patients were instructed in a formal, 1-month, 3 times a week, 40-minute session. Continue at home for additional 6 months. Monitored by telephone and exercise logs.</p> | Trained health professionals | Patients received an individual exercise prescription based on their initial level of fitness, which specified types of activities allowed, intensity and duration of each activity, and total duration of the exercise session. A typical strengthening program included 2 to 3 sets of 10 repetitive isotonic contractions per muscle group using increasing weights from 1 | Patients were monitored by telephone and exercise logs to encourage compliance. |

| Authors, Year, Diagnoses                     | Item 1: Brief name       | Item 2: Why        | Item 3, 4, 6, 7, 8, 10:<br>What (materials, procedures)<br>How<br>Where<br>How much<br>Modification                                                                                                                                                                                                                                                                                                                                                                                                                                                                                         | Item 5: Who (provided)            | Item 9: Tailoring                                                                                       | Item 11, 12:<br>How well (planned, actual)                                                                                                                                                                                                                                                                 |
|----------------------------------------------|--------------------------|--------------------|---------------------------------------------------------------------------------------------------------------------------------------------------------------------------------------------------------------------------------------------------------------------------------------------------------------------------------------------------------------------------------------------------------------------------------------------------------------------------------------------------------------------------------------------------------------------------------------------|-----------------------------------|---------------------------------------------------------------------------------------------------------|------------------------------------------------------------------------------------------------------------------------------------------------------------------------------------------------------------------------------------------------------------------------------------------------------------|
|                                              |                          |                    |                                                                                                                                                                                                                                                                                                                                                                                                                                                                                                                                                                                             |                                   | to 2 pounds depending on subject tolerance.                                                             |                                                                                                                                                                                                                                                                                                            |
| Rannou, et al. <sup>90</sup> ; 2016; SSc     | Physical therapy program | Improve disability | supervised standardized program of 6 physical therapy sections, 13 occupational therapy exercises, 3 types of splints, and a standardized individual impairment report tailored to the patient.<br>Exercises stratified by patient objectives (range of motion, strength, aerobic capacity, and activity limitations) and disease localization (mouth and face, shoulders, increase the range of motion of impaired joints, increase muscle strength and aerobic capacity, and decrease mouth microstomia, skin retractions, limitations in activities, and restrictions in participation.) | Physical and occupational therapy | Standardized individual impairment report tailored to the patient, exercises stratified by patient aims | Adherence to supervised and daily home sessions: 15 patients (14%) in the physical therapy group did not attend any supervised session. The mean attendance over the 4-week supervised period was 9.3 sessions (median 11 [range 0–12]). Adherence to the daily home sessions part of the program was low. |
| Reis and Trevisani <sup>91</sup> ; 2014; SLE | Aerobic exercise         | Improving Sleep    | 16 weeks, two times per a week; from 1st week up to and including 4th week, subjects will do: 5 minutes warm-up, then 15-30 minutes low to moderate (55-65% VO <sub>2</sub> ) exercise, then 15 minutes stretching. From 5th week up to and including 16th week, subjects will do: 5 minutes warm-up, then intermittent training for between 30-40 minutes, then 10 minutes stretching.                                                                                                                                                                                                     | No information                    | The intensity was set individually at the VO <sub>2</sub> of the patient.                               | No information.                                                                                                                                                                                                                                                                                            |

| Authors, Year, Diagnoses                        | Item 1: Brief name                                                            | Item 2: Why                                                                                               | Item 3, 4, 6, 7, 8, 10:<br>What (materials, procedures)<br>How<br>Where<br>How much<br>Modification                                                                                                                                                                                                                                                                                                                                                                                                                                                                                                                                                                                                                                                                                                                                                       | Item 5: Who (provided)                                                                                                                                                    | Item 9: Tailoring                                                                                                                     | Item 11, 12:<br>How well (planned, actual)                                       |
|-------------------------------------------------|-------------------------------------------------------------------------------|-----------------------------------------------------------------------------------------------------------|-----------------------------------------------------------------------------------------------------------------------------------------------------------------------------------------------------------------------------------------------------------------------------------------------------------------------------------------------------------------------------------------------------------------------------------------------------------------------------------------------------------------------------------------------------------------------------------------------------------------------------------------------------------------------------------------------------------------------------------------------------------------------------------------------------------------------------------------------------------|---------------------------------------------------------------------------------------------------------------------------------------------------------------------------|---------------------------------------------------------------------------------------------------------------------------------------|----------------------------------------------------------------------------------|
| Reis-Neto, et al. <sup>92</sup> ; 2013; SLE     | Supervised physical exercise                                                  | Increase endothelial function, ergospirometric test variables and disease activity                        | Exercise protocol: three times per week for 60 min (a 10-min warm-up, 40 min of walking and a 10-min cool-down) in the morning over 16 weeks, walk was conducted at a heart rate corresponding to the ventilatory 1 threshold (VT1) obtained from ergospirometry.                                                                                                                                                                                                                                                                                                                                                                                                                                                                                                                                                                                         | Physical educator or physician                                                                                                                                            | Heart rate corresponding to the ventilatory 1 threshold                                                                               | Patients were excluded if they did not attend at least 75% of exercise sessions. |
| Rimmer, et al. <sup>93</sup> ; 2013; SLE        | Personalized Online Weight and Exercise Response System (POWER and POWERplus) | Weight management                                                                                         | POWER and POWERplus: 1) Recommendation to exercise from physician; 2) Information brochure on exercise; 3) Pedometer; 4) Monthly newsletter; 5) Telephone consultation to develop a personalized physical activity program; 6) Telephone consultation to develop a personalized nutrition program; 7) Coaching calls to set goals, overcome barriers, and monitor progress regarding physical activity only PowerPlus: 8) Coaching calls to set goals, overcome barriers, and monitor progress regarding healthy eating                                                                                                                                                                                                                                                                                                                                   | POWERS telephone coaches, who had undergraduate degrees in exercise science, nutrition, health education, or a related field, were recruited and trained for this project | Personalized physical activity program, nutrition program, goals to overcome barriers and monitor progress                            | No information.                                                                  |
| Sahebalzamani, et al. <sup>94</sup> ; 2016; SLE | Continuous care model (CCM)                                                   | Improve knowledge scores (patient's knowledge and patient's perception of family awareness and knowledge) | Aim is to build a continuous and effective relationship between the nurse, the patient, and his/her family.<br>CCM consist of four stages: orientation, sensitization, control, and evaluation.<br>Orientation: intended to explain the intervention to the patients and their families.<br>Sensitization: intended to increase awareness and involvement of the patients and their families about SLE and the process of self-care by providing educational materials and arranging discussion sessions with the patients and their families.<br>Control: evaluate the quality of care received by the patients and reinforce and internalize the healthy behaviors.<br>Evaluation: intended to reevaluate the process of care and consider the achievements and failures in the process of patient care.<br>Details summary is depicted in the article. | Rheumatologist                                                                                                                                                            | Tailored according to the needs of patients, family is exclusively addressed and educated to achieve better surrounding for patients. | 7 patients dropped out.                                                          |
| Samuelson and Ahlmén <sup>95</sup> ; 2003; SSC  | Patient education program                                                     | Improve self-efficacy                                                                                     | Aim of the educational program: 1) Increase knowledge about the disease, 2) Decrease feelings of being concerned, 3) Facilitate daily activities and influence the participants to adapt                                                                                                                                                                                                                                                                                                                                                                                                                                                                                                                                                                                                                                                                  | Occupational therapist, social worker, rheumatologist,                                                                                                                    | Individual goals. Patients could ask for                                                                                              | No information.                                                                  |

| Authors,<br>Year,<br>Diagnoses | Item 1: Brief name | Item 2: Why | Item 3, 4, 6, 7, 8, 10:<br>What (materials, procedures)<br>How<br>Where<br>How much<br>Modification                                                                                                                                                                                                                                                                                                                                                                                                                                                                                                                                                                                                                                                                                                                                                                                                                                                                                                                                                                                                                                                                                                                                                                                                                                                                                                                                                                                                                                                                                                                                                                                              | Item 5: Who<br>(provided)  | Item 9: Tailoring   | Item 11, 12:<br>How well<br>(planned,<br>actual) |
|--------------------------------|--------------------|-------------|--------------------------------------------------------------------------------------------------------------------------------------------------------------------------------------------------------------------------------------------------------------------------------------------------------------------------------------------------------------------------------------------------------------------------------------------------------------------------------------------------------------------------------------------------------------------------------------------------------------------------------------------------------------------------------------------------------------------------------------------------------------------------------------------------------------------------------------------------------------------------------------------------------------------------------------------------------------------------------------------------------------------------------------------------------------------------------------------------------------------------------------------------------------------------------------------------------------------------------------------------------------------------------------------------------------------------------------------------------------------------------------------------------------------------------------------------------------------------------------------------------------------------------------------------------------------------------------------------------------------------------------------------------------------------------------------------|----------------------------|---------------------|--------------------------------------------------|
|                                |                    |             | <p>their behavior to their current capacity, 4) Formulate realistic goals that could be reach during the course, 5) Peer contact.</p> <p>Frequency: seven 3-hour group sessions for 5 weeks</p> <p>Content:</p> <p>First session: conversation concerning experiences of “living with scleroderma”, and participants had an opportunity to suggest additional topics for the course</p> <p>Second session: rheumatologist informed the participants about medical aspects of the disease/medication, discussion, goal setting as homework</p> <p>Third session: PT taught about the human body and about mobility in regard to bones, muscles, and joints, patients were led through the activities of a home exercise program, together with the nurse different kinds of physical pain control methods were discussed</p> <p>Fourth session: OT told about hand function and common SSc hand problems, practical test of thermotherapy and hand exercises was introduced, and information about joint protection, splints, and skin care was given, ADLs affected by the disease, and how to solve such problems</p> <p>Fifth session: Exercises in a temperate pool, different relaxation methods by the PT; ergonomics by an OT</p> <p>Sixth session: goal-setting exercise results, information presented by a dietitian, social worker informed about influences on everyday tasks, work, and leisure activities and gave information about available community resources.</p> <p>Seventh session: Time for questions with the rheumatologist, patients carried out practical activities in the training kitchen, with the opportunity to use ergonomic methods and assistive devices.</p> | physiotherapist, dietitian | additional content. |                                                  |

| Authors, Year, Diagnoses                              | Item 1: Brief name                               | Item 2: Why                                                                                               | Item 3, 4, 6, 7, 8, 10:<br>What (materials, procedures)<br>How<br>Where<br>How much<br>Modification                                                                                                                                                                                                                                                                                                                                                                                                                                                                                                                           | Item 5: Who (provided)                                                        | Item 9: Tailoring                                                                                                  | Item 11, 12:<br>How well (planned, actual)                                                                                                        |
|-------------------------------------------------------|--------------------------------------------------|-----------------------------------------------------------------------------------------------------------|-------------------------------------------------------------------------------------------------------------------------------------------------------------------------------------------------------------------------------------------------------------------------------------------------------------------------------------------------------------------------------------------------------------------------------------------------------------------------------------------------------------------------------------------------------------------------------------------------------------------------------|-------------------------------------------------------------------------------|--------------------------------------------------------------------------------------------------------------------|---------------------------------------------------------------------------------------------------------------------------------------------------|
| Sandqvist, et al. <sup>96</sup> ; 2004; SSC           | Paraffin bath in combination with hand exercises | Improve hand function                                                                                     | Paraffin treatment once a day (for a month); hand was dipped five to six times into a 50°C warm paraffin bath, then inserted into a plastic bag and then in quilted mittens, in which it was kept for about 10 min until the paraffin got cold. Hand exercise was performed immediately after the paraffin bath; exercise programme was adapted to each individual's needs, apart from five compulsory exercises (only four exercises were reported in the article): isolated finger flexion, finger extension, finger abduction and thumb abduction.                                                                         | No information.                                                               | Exercise programme was adapted to each individual's needs                                                          | To ensure compliance with the procedure, the patients were allowed to borrow the paraffin bath for another month for the treatment of both hands. |
| Schouffoer, et al. <sup>97</sup> ; 2011; SSC          | Multidisciplinary team care program              | To improve body function, functional ability and quality of life                                          | Standardized group sessions for 12 consecutive weeks, one day per week. (general exercises, hand/mouth exercises, and educational sessions); patients were required to participate in individual supervised exercises provided by a physical therapist near their own home in a private practice once a week and to perform a home-based exercise program on at least 6 days per week.                                                                                                                                                                                                                                        | rheumatologist, occupational therapist, physiotherapist, social worker, nurse | Depending on the patients' individual needs, individual treatments by the rheumatologist and health professionals. | Adherence was monitored by attendance lists and records of individual progress. For the home-based individual exercises a diary was filled in.    |
| Sheffield Hallam University <sup>98</sup> ; 2019; SSC | Exercise intervention - arm cranking             | Examine the feasibility of exercise in patients with Systemic Sclerosis experiencing Raynaud's Phenomenon | <p>Exercise intervention arm cranking: on an arm crank ergometer; Each training will be consisted of high intensity interval training for 30 minutes (30s 100% PPO/ 30s passive recovery) twice per week for 3 months. Patients will perform two visits for the baseline measurements prior the exercise intervention by repeating them at the end of the exercise intervention.</p> <p>Exercise intervention - Cycling<br/>Patients will be requested to perform an exercise session on a cycle ergometer. Each training will be consisted of high intensity interval training for 30 minutes (30s 100% PPO/ 30s passive</p> | No information                                                                | Tailored to the patients physical fitness                                                                          | Three Parts of primary Outcome Measures:<br>1) Part I (Pilot study): Microcirculation in the digital area [Time Frame: 12 months]                 |

| Authors, Year, Diagnoses                 | Item 1: Brief name     | Item 2: Why                                    | Item 3, 4, 6, 7, 8, 10:<br>What (materials, procedures)<br>How<br>Where<br>How much<br>Modification                                                                                                                                                                                                                                                                                                                                                                                                                                                                                                                                                                                                          | Item 5: Who (provided)                            | Item 9: Tailoring                                 | Item 11, 12:<br>How well (planned, actual)                                                                                                                                                                                       |
|------------------------------------------|------------------------|------------------------------------------------|--------------------------------------------------------------------------------------------------------------------------------------------------------------------------------------------------------------------------------------------------------------------------------------------------------------------------------------------------------------------------------------------------------------------------------------------------------------------------------------------------------------------------------------------------------------------------------------------------------------------------------------------------------------------------------------------------------------|---------------------------------------------------|---------------------------------------------------|----------------------------------------------------------------------------------------------------------------------------------------------------------------------------------------------------------------------------------|
|                                          |                        |                                                | recovery) twice per week for 3 months. Patients will perform two visits for the baseline measurements prior the exercise intervention by repeating them at the end of the exercise intervention (follow up measurements                                                                                                                                                                                                                                                                                                                                                                                                                                                                                      |                                                   |                                                   | 2) Part II (Feasibility study): Feasibility of a combined exercise protocol (aerobic with resistance training). [Time Frame: 12 months]<br>3) Part II (Feasibility study): Assessment of Quality of life [Time Frame: 12 months] |
| Sheikh, et al. <sup>99</sup> ; 2019; SLE | Walk With Ease (WWE)   | Improve pain, stiffness, and fatigue           | Walk With Ease (WWE) is a 6-week evidencebased walking program for adults with arthritis, available in group or self-directed formats.<br>Self-Guided Format: Patients have to purchase the guidebook. It includes coaching and counselling techniques to (1) Develop a walking plan that will meet the patient's needs, (2) Stay motivated, (3) Manage pain, (4) Learn to exercise safely.<br>In-Person Community Format: WWE group sessions meet three times per week for 6 weeks. Trained group exercise leaders begin each session with a pre-walk discussion covering a specified topic related to exercise and arthritis, followed by a 10- to 40-minute walk that includes a warm-up and a cool-down. | Self-administered, trained group exercise leaders | Intervention was tailored to the patient's needs. | Participants tracked their walking on paper logs (duration walked and distance walked for each day that they walked).                                                                                                            |
| Sohng <sup>100</sup> ; 2003; SLE         | Self-management course | Improve fatigue, coping skills, self-efficacy, | Six weekly 2-hour sessions; course activities focused on an overview of pharmacological therapy, symptom management, exercise, interpersonal relationships, coping with flares, healthy                                                                                                                                                                                                                                                                                                                                                                                                                                                                                                                      | Nurses                                            | No information.                                   | No information.                                                                                                                                                                                                                  |



| Authors, Year, Diagnoses                  | Item 1: Brief name                  | Item 2: Why                                                                           | Item 3, 4, 6, 7, 8, 10:<br>What (materials, procedures)<br>How<br>Where<br>How much<br>Modification                                                                                                                                                                                                                                                                                                                                                                                                                                                                                                                                                  | Item 5: Who (provided) | Item 9: Tailoring               | Item 11, 12:<br>How well (planned, actual)                                                                                                                                                                                                                                    |
|-------------------------------------------|-------------------------------------|---------------------------------------------------------------------------------------|------------------------------------------------------------------------------------------------------------------------------------------------------------------------------------------------------------------------------------------------------------------------------------------------------------------------------------------------------------------------------------------------------------------------------------------------------------------------------------------------------------------------------------------------------------------------------------------------------------------------------------------------------|------------------------|---------------------------------|-------------------------------------------------------------------------------------------------------------------------------------------------------------------------------------------------------------------------------------------------------------------------------|
|                                           |                                     | depression, pain, disease activity                                                    | lifestyles, and management of common SLE-related health problems                                                                                                                                                                                                                                                                                                                                                                                                                                                                                                                                                                                     |                        |                                 |                                                                                                                                                                                                                                                                               |
| Tench, et al. <sup>101</sup> ; 2003; SLE  | Exercise Group and Relaxation group | To improve fatigue                                                                    | Exercise group: patients asked to exercise at home three times a week for 30 to 50 min for a period of 12 weeks at a heart rate corresponding to 60% of peak oxygen consumption; main exercise: walking but patients were encouraged to take other forms of exercise, such as cycling and swimming, and were seen every 2 weeks for a supervised exercise session.<br>Relaxation group: patients were asked to listen to a 30-min relaxation audiotape a minimum of three times a week in a darkened, warm and quiet room; in addition every 2 weeks a supervised relaxation session.                                                                | Rheumatologist         | Exercise could be chosen freely | Exercise group median (interquartile range) of supervised sessions attended 5 (4–5); relaxation group 4 (2–5). median number home exercise sessions was 35 (25–40); median number home relaxation sessions was 33 (12–36), with a median duration of 30 min for each session. |
| Thombs, et al. <sup>102</sup> , 2018; SSc | SPIN-SSLED Program                  | Improving SSc support group leaders' self-efficacy for carrying out their leader role | The program includes 13 modules that will be delivered live via webinar over the course of the 3-month program. Each module will be delivered in a 60- to 90-minute session. Module topics include (1) The leader's role; (2) Starting a support group; (3) Structuring a support group meeting; (4) Scleroderma 101; (5) Successful support group culture; (6 &7) Managing support group dynamics I and II; (8) grief and crisis in scleroderma; (9) Marketing and recruitment; (10) The continuity of the group; (11) Supporting yourself as a leader; (12) Virtual support group meetings, (13) Support group leader resources. Participants will | No information         | No tailoring                    | No information                                                                                                                                                                                                                                                                |

| Authors, Year, Diagnoses                                                  | Item 1: Brief name                              | Item 2: Why                                                                             | Item 3, 4, 6, 7, 8, 10:<br>What (materials, procedures)<br>How<br>Where<br>How much<br>Modification                                                                                                                                                                                                                                                                                                                                                                                                                                                                                                                                                                                                                                                                                                                                                                                                                                                                                                                                                                                                                                                                                                                                                                                                                                                                                                                                                                                                                        | Item 5: Who (provided)                                                                              | Item 9: Tailoring                                            | Item 11, 12:<br>How well (planned, actual) |
|---------------------------------------------------------------------------|-------------------------------------------------|-----------------------------------------------------------------------------------------|----------------------------------------------------------------------------------------------------------------------------------------------------------------------------------------------------------------------------------------------------------------------------------------------------------------------------------------------------------------------------------------------------------------------------------------------------------------------------------------------------------------------------------------------------------------------------------------------------------------------------------------------------------------------------------------------------------------------------------------------------------------------------------------------------------------------------------------------------------------------------------------------------------------------------------------------------------------------------------------------------------------------------------------------------------------------------------------------------------------------------------------------------------------------------------------------------------------------------------------------------------------------------------------------------------------------------------------------------------------------------------------------------------------------------------------------------------------------------------------------------------------------------|-----------------------------------------------------------------------------------------------------|--------------------------------------------------------------|--------------------------------------------|
|                                                                           |                                                 |                                                                                         | receive a workbook, be shown filmed vignettes, and will have access to an online resource center.                                                                                                                                                                                                                                                                                                                                                                                                                                                                                                                                                                                                                                                                                                                                                                                                                                                                                                                                                                                                                                                                                                                                                                                                                                                                                                                                                                                                                          |                                                                                                     |                                                              |                                            |
| Timóteo, et al. <sup>103</sup> ; 2018; SLE                                | Kinesiotherapy                                  | Improve functional capacity, quality of life, and serum levels of immune system markers | <p>Frequency: period of 4 months, three times a week, individually in sessions lasting 50 min.</p> <p>Structure: warm-up, strengthening and stretching sessions.</p> <p>Content:</p> <p>1) Warm-up consisted of active movement and self-stretching of the upper limbs, trunk and lower limbs, for 5 min in an orthostatic position.</p> <p>2) Muscular strength training of the upper and lower limbs consisted of resistance exercises with barbell plates and dumbbells, with voluntary ventilation, performed in three sets of 10 repetitions, with a load of 70%; according to the 10 RM test there were increases of between 2 and 10% of the maximum current load, for one or two additional repetitions.</p> <p>3) Stretching in the final minutes consisted of passive stretching of the posterior chain of the lower limbs with the patient in dorsal decubitus, neck stretching with the patient seated, and stretching of the upper limbs also with the patient seated. Each movement was performed three times and was maintained for 30 seconds</p> <p>An aerobic training was added after the first month and consisted of 10 min on a stationary electromagnetic bicycle with the load regulated as desired by the patient. (60 rotations per minute and the load could be intensified every 3 min, without the goal of increasing performance in this exercise, but increases of from 5 to 10%, in terms of time and load, were made whenever possible, depending on the willingness of the patient.)</p> | Physiotherapist                                                                                     | The intensity was set individually at the RM of the patient. | No information.                            |
| Twumasi, et al. <sup>104</sup> ; Twumasi, et al. <sup>105</sup> 2020; SLE | Chronic Disease Self-Management Program (CDSMP) | Improve self-management                                                                 | The CDSMP is designed to enhance the skills necessary to managing health problems (enhance self-efficacy through weekly action plans, behavior modeling, vicarious learning, problem solving, and peer support) among people with chronic conditions.                                                                                                                                                                                                                                                                                                                                                                                                                                                                                                                                                                                                                                                                                                                                                                                                                                                                                                                                                                                                                                                                                                                                                                                                                                                                      | Trained leaders, one or both of whom are non-health professionals with chronic diseases themselves. | Intervention was tailored to the patient's needs.            | n.a.                                       |

| Authors, Year, Diagnoses                     | Item 1: Brief name                                                | Item 2: Why                  | Item 3, 4, 6, 7, 8, 10:<br>What (materials, procedures)<br>How<br>Where<br>How much<br>Modification                                                                                                                                                                                                                                                                                                                                                                                                                                                                                                                                                                                                                                                                                                                                          | Item 5: Who (provided) | Item 9: Tailoring                                     | Item 11, 12:<br>How well (planned, actual)                                                                                                             |
|----------------------------------------------|-------------------------------------------------------------------|------------------------------|----------------------------------------------------------------------------------------------------------------------------------------------------------------------------------------------------------------------------------------------------------------------------------------------------------------------------------------------------------------------------------------------------------------------------------------------------------------------------------------------------------------------------------------------------------------------------------------------------------------------------------------------------------------------------------------------------------------------------------------------------------------------------------------------------------------------------------------------|------------------------|-------------------------------------------------------|--------------------------------------------------------------------------------------------------------------------------------------------------------|
|                                              |                                                                   |                              | Format: Small group workshops (12-16 participants), 1 session per week for 6 weeks (2,5 hours per session).<br>Content: (1) Techniques to deal with problems such as frustration, fatigue, pain and isolation, (2) Appropriate exercise for maintaining and improving strength, flexibility, and endurance, (3) Appropriate use of medications, (4) Communicating effectively with family, friends, and health professionals, (5) Nutrition, (6) Decision making, and (7) How to evaluate new treatments.                                                                                                                                                                                                                                                                                                                                    |                        |                                                       |                                                                                                                                                        |
| Uras, et al.<br><sup>106</sup> ; 2019; SSc   | Educational materials and a specific “face-to-face” interventions | Improve mouth opening        | Educational materials (brochures and DVD) plus a face-to-face intervention. A nurse provided explanations of the exercises, watched the explanatory DVD with the patients, and answered questions and commented relevant points. She then had the patients, under direct observation, repeat the exercises in front of a mirror, so that any errors could be pointed out and corrected.<br><br>The intervention consisted of stretching exercises and movements involving the mimic muscles to be performed in front of a mirror. These exercises were to be done every day (for 25 minutes) for the entire duration of the program (12 months) and registered in the diary, with any comments. The audio-visual DVD is available at <a href="https://www.youtube.com/watch?v=F2Gzc10cRKE">https://www.youtube.com/watch?v=F2Gzc10cRKE</a> . | Nurse                  | No tailoring.                                         | Patients were contacted each month by a nurse, who checked to see if there were any problems and asked about the patient’s adherence to the exercises. |
| Vitali, et al.<br><sup>107</sup> ; 2019; SSc | Oral exercises                                                    | Improve oral motor functions | Treatments for impairments of oral structures were sequentially introduced: at first we provided exercises to increase MMO (stretching exercises were performed slowly to prevent injuries, stretch tissues as far as patients are comfortable, held position for 15–20 s.), when a minimum range of motion of oral structures was achieved, strength exercises were provided.<br>Function-oriented exercises (10–20 repetitions): several objects, such as food, kitchen utensils, or others (straws, spoons, tongue depressors, lollypops, gauzes), were used to make them more functional and show the subjects how they performed movements (see study for a detailed description of exercises).                                                                                                                                         | Speech therapist       | Intervention was tailored to the patient’s condition. | The exercises were embedded in daily activities, using everyday objects to encourage adherence and promote generalization.                             |

| Authors, Year, Diagnoses                                                            | Item 1: Brief name                                                                          | Item 2: Why                                                                                                                                | Item 3, 4, 6, 7, 8, 10:<br>What (materials, procedures)<br>How<br>Where<br>How much<br>Modification                                                                                                                                                                                                                                                                                                                                                                                                                                                                                                                    | Item 5: Who (provided)   | Item 9: Tailoring                                   | Item 11, 12:<br>How well (planned, actual)                                                                                                           |
|-------------------------------------------------------------------------------------|---------------------------------------------------------------------------------------------|--------------------------------------------------------------------------------------------------------------------------------------------|------------------------------------------------------------------------------------------------------------------------------------------------------------------------------------------------------------------------------------------------------------------------------------------------------------------------------------------------------------------------------------------------------------------------------------------------------------------------------------------------------------------------------------------------------------------------------------------------------------------------|--------------------------|-----------------------------------------------------|------------------------------------------------------------------------------------------------------------------------------------------------------|
|                                                                                     |                                                                                             |                                                                                                                                            | The intervention and intensity was tailored to subjects' performance.                                                                                                                                                                                                                                                                                                                                                                                                                                                                                                                                                  |                          |                                                     |                                                                                                                                                      |
| Williams, et al. <sup>108</sup> ;<br>Williams, et al. <sup>109</sup> ; 2019;<br>SLE | Peer Approaches to Lupus Self-Management (PALS) project                                     | To improve self-management, Quality of Life, disease activity, stress, anxiety, depression and Th1/ Th2 balance in peripheral blood        | Patients were matched with peer mentors; by telephone for approximately 60 min every week for 12 weeks; content was adapted from the six modules of the Chronic Disease Self-Management Program (CDMP), Arthritis Self-Management Program (ASMP), and Systemic Lupus Erythematosus Self-Help (SLESH) Course.<br>Content: (1) Goal setting & action planning, (2) Exercise, (3) Medication overview, (4) Effective communication, (5) Nutrition & healthy eating, (6) Stress relaxation techniques, (7) Coping, (8) Body image, (9) Complications, (10) Self-monitoring, (11) Sexuality & sexual health, and (12) Trust | Peer mentoring           | Tailored to African American women and their needs. | Three mentees and one mentor were lost to follow-up over the course of the study.                                                                    |
| Williams, et al. <sup>110</sup> ; 2017;<br>SLE                                      | Peer Approaches to Lupus Self-Management (PALS) project; primary outcome was not specified, | To improve PROs (self-management, Quality of Life, disease activity, stress, anxiety, depression) and Th1/ Th2 balance in peripheral blood | Patients were matched with peer mentors; by telephone for approximately 60 min every week for 12 weeks; content was adapted from the six modules of the Chronic Disease Self-Management Program (CDMP), Arthritis Self-Management Program (ASMP), and Systemic Lupus Erythematosus Self-Help (SLESH) Course, and further tailored to African American women with six added sessions based on cultural issues reported as important to African Americans in earlier research conducted by the principle investigator.                                                                                                   | Peer mentoring           | Tailored to African American women                  | No information.                                                                                                                                      |
| Williams, et al. <sup>111</sup> ; 2016;<br>SLE                                      | Improve Quality of life for African-American lupus patients (IQAN)                          | To improve self-management (health behaviors, health status, health care utilization, biological markers)                                  | Individualized intervention plan will be developed with each participant. Each IIP will include 1–4 options, including a mail-delivered arthritis kit, addition and access to a listserv, participation in a support group, and enrollment in local self-management program(s); intervention will inherently vary by participant.                                                                                                                                                                                                                                                                                      | Intervention Coordinator | Tailored to the participant needs                   | Quarterly review of their IIP, intervention participants will receive follow up calls to gauge their progress, comfort, adherence, and occurrence of |

| Authors, Year, Diagnoses                 | Item 1: Brief name                                                  | Item 2: Why                                                                     | Item 3, 4, 6, 7, 8, 10:<br>What (materials, procedures)<br>How<br>Where<br>How much<br>Modification                                                                                                                                                                                                                                                                                                                                                                                                                                                                                                                                                                                                                                                                                                                                                                                                                                                            | Item 5: Who (provided) | Item 9: Tailoring                                 | Item 11, 12:<br>How well (planned, actual)                     |
|------------------------------------------|---------------------------------------------------------------------|---------------------------------------------------------------------------------|----------------------------------------------------------------------------------------------------------------------------------------------------------------------------------------------------------------------------------------------------------------------------------------------------------------------------------------------------------------------------------------------------------------------------------------------------------------------------------------------------------------------------------------------------------------------------------------------------------------------------------------------------------------------------------------------------------------------------------------------------------------------------------------------------------------------------------------------------------------------------------------------------------------------------------------------------------------|------------------------|---------------------------------------------------|----------------------------------------------------------------|
|                                          |                                                                     |                                                                                 |                                                                                                                                                                                                                                                                                                                                                                                                                                                                                                                                                                                                                                                                                                                                                                                                                                                                                                                                                                |                        |                                                   | any adverse events.                                            |
| Wolff, et al. <sup>112</sup> , 2014; SSC | SMART framework for long term management of chronic hand conditions | To improve confidence and ability to self-management                            | The program consists of a "in-person" and a "remote management" component. The "in-person" component contains an initial phase (from one session to 1-2 sessions weekly over a period of a month to 6 weeks) and a follow up (re-evaluate and assess status performed every 4-6 weeks). Content "in-person": assessment, education, individualized hand home exercise program, general conditioning program, comprehensive treatment. Content "remote management": self Daily: self assessment with templates, self stretches, paraffin treatment Weekly: online logs of their performance, photo documentation                                                                                                                                                                                                                                                                                                                                                | Physician              | No information.                                   | No information.                                                |
| Wu, et al. <sup>113</sup> ; 2019; SLE    | Physical activity counselling                                       | To improve physical activity, disease activity, quality of life, fatigue, sleep | The consultations were developed based on the 5A's model (assess, advise, agree, assist, arrange) combined with the three M's techniques (mention, model, and monitor):<br>Assess: to assess patient's knowledge, attitude and behaviour towards exercise<br>Advise: to advise on the benefits, exercise regimen, and self-monitoring tool<br>Agree: to establish a personal SMART goal<br>Assist: to achieve personal goals and problem-solving abilities<br>Arrange: to schedule a follow-up visit<br>Patients participated in an exercise counselling programme and wore a pedometer on the waist for 1 week as the baseline and for 12 weeks following the baseline, they were taught how to set up the pedometer, the f2f counselling was conducted at weeks 1, 4, and 8 and lasted 30 minutes; follow-up phone calls were made on weeks 2, 6, and 10 to assess the participants' achievement of their daily goals, and possible barriers were discussed. | Nurse                  | Intervention was tailored to the patient's needs. | Not reported                                                   |
| Xie, et al. <sup>114</sup> ; 2018; SLE   | Transitional care (Omaha System)                                    | Improve self-care, disease activity, quality of life                            | In this study, the transitional care was designed on the basis of the Omaha System.<br>Omaha System is a framework for problem-solving;<br>Content: consists of three subsystems: problem classification scheme, intervention scheme, and problem rating scale.                                                                                                                                                                                                                                                                                                                                                                                                                                                                                                                                                                                                                                                                                                | Nurses                 | To the needs of the patients                      | Telephone follow-up was used to monitor participant compliance |

| Authors, Year, Diagnoses                  | Item 1: Brief name                                          | Item 2: Why                               | Item 3, 4, 6, 7, 8, 10:<br>What (materials, procedures)<br>How<br>Where<br>How much<br>Modification                                                                                                                                                                                                                                                                                                                                                                                                                                                                                                                                                                                                                                                                                                                                                                                                                                                                                                                                                                                                                                 | Item 5: Who (provided)   | Item 9: Tailoring                                                                                                                   | Item 11, 12:<br>How well (planned, actual)                                                  |
|-------------------------------------------|-------------------------------------------------------------|-------------------------------------------|-------------------------------------------------------------------------------------------------------------------------------------------------------------------------------------------------------------------------------------------------------------------------------------------------------------------------------------------------------------------------------------------------------------------------------------------------------------------------------------------------------------------------------------------------------------------------------------------------------------------------------------------------------------------------------------------------------------------------------------------------------------------------------------------------------------------------------------------------------------------------------------------------------------------------------------------------------------------------------------------------------------------------------------------------------------------------------------------------------------------------------------|--------------------------|-------------------------------------------------------------------------------------------------------------------------------------|---------------------------------------------------------------------------------------------|
|                                           |                                                             |                                           | <p>Problem classification scheme: covers physiological, psychosocial, health-related behaviors and four environmental domains, each of which contains a number of health problems, totaling health problems.</p> <p>Intervention scheme: consists of teaching, guidance, and counseling, treatments and procedures, case management and four broad surveillance categories.</p> <p>Problem rating scale: is composed of three Likert 5-point scales to measure client's knowledge, behavior, and status</p> <p>Intervention used in the study: first, SLE-related health problems were included in the transitional care protocol; each of the problems was scored on knowledge, behavior, and status by using the three Likert 5-point scales in the problem rating scale. If any one of the scores of a patient's knowledge, behavior, or status is less than 4 points, it indicates that the intervention categories and specific interventions corresponding to the problem should be provided</p> <p>Frequency: 12 weeks, four structural assessments and corresponding interventions as well as four telephone follow-ups</p> |                          |                                                                                                                                     | with transitional care interventions and identify the self-management barriers of patients. |
| Yelnik, et al. <sup>115</sup> ; 2016; SLE | Cardiovascular disease (CVD) prevention counseling program; | To improve prevalence of CVD risk factors | <p>consisted of 2 phases:</p> <p>1) Assessment phase: evaluation of blood pressure, blood glucose, cholesterol profile, body mass index (BMI), smoking, lifestyle habits (diet and exercise), aPL profile, and medications.</p> <p>2) Education phase: detailed discussion of the above risk factors, as well as CVD and thrombosis prevention strategies, tailored lifestyle recommendations, written summary report, referral further institutions (dietitian, anti-smoking, etc.) if needed.</p> <p>During the 3-year follow up, patients were followed every 3–6 months (based on their baseline risk) for CVD risk factor reassessment and for continued education by trained personnel (a nurse practitioner and a medical doctor), also regular</p>                                                                                                                                                                                                                                                                                                                                                                          | Nurse and rheumatologist | Tailored lifestyle recommendations, written summary report, referral further institutions (dietitian, anti-smoking, etc.) if needed | At each follow up visit, questions about diet/exercise habits were repeated.                |

| Authors, Year, Diagnoses                 | Item 1: Brief name                                   | Item 2: Why                   | Item 3, 4, 6, 7, 8, 10:<br>What (materials, procedures)<br>How<br>Where<br>How much<br>Modification                                                                                                                                                                                                                                                                                                                                                                                                                                                                                                                                                                                                                                                                                                                           | Item 5: Who (provided)                         | Item 9: Tailoring                                                                                                                                                                                        | Item 11, 12:<br>How well (planned, actual)                                                                                                                           |
|------------------------------------------|------------------------------------------------------|-------------------------------|-------------------------------------------------------------------------------------------------------------------------------------------------------------------------------------------------------------------------------------------------------------------------------------------------------------------------------------------------------------------------------------------------------------------------------------------------------------------------------------------------------------------------------------------------------------------------------------------------------------------------------------------------------------------------------------------------------------------------------------------------------------------------------------------------------------------------------|------------------------------------------------|----------------------------------------------------------------------------------------------------------------------------------------------------------------------------------------------------------|----------------------------------------------------------------------------------------------------------------------------------------------------------------------|
|                                          |                                                      |                               | newsletters, pamphlets, and brochures about CVD risk factors and prevention strategies.                                                                                                                                                                                                                                                                                                                                                                                                                                                                                                                                                                                                                                                                                                                                       |                                                |                                                                                                                                                                                                          |                                                                                                                                                                      |
| Young, et al. <sup>116</sup> ; 2002; SLE | LupusHelp                                            | Increasing patient knowledge  | Patient information easy to understand without being too basic.                                                                                                                                                                                                                                                                                                                                                                                                                                                                                                                                                                                                                                                                                                                                                               | Internet-based                                 | No tailoring                                                                                                                                                                                             | n.a.                                                                                                                                                                 |
| Yuen, et al. <sup>117</sup> ; 2011; SLE  | Home-based exercise program using the Wii Fit system | Improve fatigue               | Each exercise session began with a 5-min warm up (e.g. one of the games in Yoga involves stretching and/or deep breathing), then aerobic exercise followed by strength training, 5-min cool-down involving deep breathing and/or slow stepping and walking. Wii Fit exercise (aerobic and strengthening) last for 10–20 min depending on the participant's ability, goal was to increase to 30 min per session on 3 days per week over a 10-week period. Participants were allowed to increase the frequency and/or duration of the Wii Fit exercise if they wished to do so, and were encouraged to choose the exercise games that they enjoyed; exercise intensity at a perceived exertion level of 11–13 ('fairly light – somewhat hard') on the 15-point Borg 'Rating of Perceived Exertion' Scale (ranging from 6 to 20) | Research coordinator, Nintendo Wii Fit         | Intensity adapted to the patient's condition; increase the frequency and/or duration of the Wii Fit exercise if they wished to do so, and were encouraged to choose the exercise games that they enjoyed | Participants were encouraged to invite their spouse, significant other, or other family members to engage in the Wii Fit exercises together for increased adherence. |
| Yuen, et al. <sup>118</sup> ; 2011; SSC  | home orofacial exercise program                      | Improve size of oral aperture | Manual mouth-stretching and oral-augmentation exercises<br>manual mouth-stretching exercise: placing the right thumb at the corner of the left side of the mouth and the left thumb at the corner of the right side of the mouth; simultaneously stretch both sides of the mouth horizontally as far as possible, hold position for 15 to 20s, rest for 10s before repeating the stretching.<br>oral-augmentation exercise: inserting a wood stick (2 cm × 1.5 cm × 9.5 cm) between the upper and lower teeth at one side of the mouth corner, stretch the mouth opening by turning the stick on the corner and gently pushing the stick as far back towards the posterior teeth as possible, hold the stick in this position for 15 to 20s, then removed the stick and rested for                                            | Home exercise/<br>trained research coordinator | No tailoring.                                                                                                                                                                                            | Adherence rates were determined by computing the ratio of the number of exercise sessions performed by the participants to the number of sessions requested.         |

| Authors, Year, Diagnoses                                                    | Item 1: Brief name                                        | Item 2: Why                        | Item 3, 4, 6, 7, 8, 10:<br>What (materials, procedures)<br>How<br>Where<br>How much<br>Modification                                                                                                                                                                                                                                                                                                                                                                                                                                                                                                        | Item 5: Who (provided)                         | Item 9: Tailoring                                                                        | Item 11, 12:<br>How well (planned, actual)                                                                                                                                                                                                                                                |
|-----------------------------------------------------------------------------|-----------------------------------------------------------|------------------------------------|------------------------------------------------------------------------------------------------------------------------------------------------------------------------------------------------------------------------------------------------------------------------------------------------------------------------------------------------------------------------------------------------------------------------------------------------------------------------------------------------------------------------------------------------------------------------------------------------------------|------------------------------------------------|------------------------------------------------------------------------------------------|-------------------------------------------------------------------------------------------------------------------------------------------------------------------------------------------------------------------------------------------------------------------------------------------|
|                                                                             |                                                           |                                    | 10s, repeat the entire process on the opposite side of the mouth.<br>each exercise repeat for three times consecutively, perform each type of exercise two times a day (morning and evening).<br>Handouts with pictures showing the exercises were given.                                                                                                                                                                                                                                                                                                                                                  |                                                |                                                                                          |                                                                                                                                                                                                                                                                                           |
| Yuen, et al. <sup>119</sup> ; 2011; SSc; (same patients as <sup>118</sup> ) | Adaptive oral hygiene devices and orofacial home-exercise | Improve gingival health            | Patients were instructed to brush their teeth for 2 minutes and to floss using the devices provided, as well as perform the orofacial exercise twice a day, if applicable, for 6 months; intervention group received a rechargeable, powered Oral-B® oscillating-rotating-pulsating toothbrush (no brushing time display) and a Reach® Access™ Flosser. An Oral-B® Precision Clean™ brush head was provided; patients with oral aperture of less than 40 mm, orofacial (manual mouth stretching and oral augmentation) exercises were taught, and handouts with pictures showing the exercises were given. | Home exercise/<br>trained research coordinator | No tailoring.                                                                            | To analyze adherence rates, we calculate the monthly adherence rates across the 6-month study period as the ratio of the number of brushing and flossing sessions each month recorded in the participants' log to the number of sessions prescribed (i.e., number of days in that month). |
| Zanatta, et al. <sup>120</sup> ; 2017; SSc                                  | Occupational therapy                                      | Improve activities of daily living | Preliminary informative meeting and six sessions of 90 minutes each over a 3-week period; topic of the program: cooking; getting dressed; personal care; cleaning the house; and leisure time. Patients were taught movements that are less damaging; elaborated different strategies to perform activities, or explore new devices to carry them out.                                                                                                                                                                                                                                                     | Occupational therapist                         | More difficult activities were recorded to elaborate different strategies or explore new | No information.                                                                                                                                                                                                                                                                           |



| Authors, Year, Diagnoses | Item 1: Brief name | Item 2: Why | Item 3, 4, 6, 7, 8, 10:<br>What (materials, procedures)<br>How<br>Where<br>How much<br>Modification | Item 5: Who (provided) | Item 9: Tailoring          | Item 11, 12:<br>How well (planned, actual) |
|--------------------------|--------------------|-------------|-----------------------------------------------------------------------------------------------------|------------------------|----------------------------|--------------------------------------------|
|                          |                    |             |                                                                                                     |                        | devices to carry them out. |                                            |

## References

- Hoffmann TC, Glasziou PP, Boutron I, et al. Better reporting of interventions: template for intervention description and replication (TIDieR) checklist and guide. *Bmj* 2014;348:g1687.
- Alexanderson H, Bergegård J, Björnådal L, et al. Intensive aerobic and muscle endurance exercise in patients with systemic sclerosis: a pilot study. *BMC research notes* 2014;7(1):86.
- Allaire SH, Niu J, LaValley MP. Employment and satisfaction outcomes from a job retention intervention delivered to persons with chronic diseases. *Rehabilitation Counseling Bulletin* 2005;48(2):100-09.
- Antonioli CM, Bua G, Frigè A, et al. An individualized rehabilitation program in patients with systemic sclerosis may improve quality of life and hand mobility. *Clinical rheumatology* 2009;28(2):159-65.
- Attia MW. Evidence-Based Physical Therapy Practice for Patients with Scleroderma. Florida Gulf Coast University, 2014.
- Austin JS, Maisiak RS, Macrina DM, et al. Health outcome improvements in patients with systemic lupus erythematosus using two telephone counseling interventions. *Arthritis & Rheumatism: Official Journal of the American College of Rheumatology* 1996;9(5):391-99.
- Avaux M, Hoellinger P, Nieuwland-Husson S, et al. Effects of two different exercise programs on chronic fatigue in lupus patients. *Acta Clinica Belgica* 2016;71(6):403-06.
- Ball TM. Structural integration-based fascial release efficacy in systemic lupus erythematosus (SLE): two case studies. *Journal of bodywork and movement therapies* 2011;15(2):217-25.
- Benatti FB, Miossi R, Passarelli M, et al. The effects of exercise on lipid profile in systemic lupus erythematosus and healthy individuals: a randomized trial. *Rheumatology international* 2015;35(1):61-69.
- Berdal G, Ingvild Bø, Dager TN, et al. Structured Goal Planning and Supportive Telephone Follow-up in Rheumatology Care: Results From a Pragmatic, Stepped-Wedge, Cluster-Randomized Trial. *Arthritis Care and Research* 2018;70(11):1576-86. doi: 10.1002/acr.23520

11. Bogdanovic G, Stojanovich L, Djokovic A, et al. Physical activity program is helpful for improving quality of life in patients with systemic lupus erythematosus. *The Tohoku journal of experimental medicine* 2015;237(3):193-99.
12. Boström C, Elfving B, Dupre B, et al. Effects of a one-year physical activity programme for women with systemic lupus erythematosus—a randomized controlled study. *Lupus* 2016;25(6):602-16.
13. Braden CJ, McGlone K, Pennington F. Specific psychosocial and behavioral outcomes from the systemic lupus erythematosus self-help course. *Health Education Quarterly* 1993;20(1):29-41.
14. Broadbent S, Crowley-McHattan Z, Zhou S, et al. The effect of the Nintendo Wii Fit on exercise capacity and gait in an elderly woman with CREST syndrome. *International Journal of Therapy and Rehabilitation* 2014;21(11):539-46.
15. Brown S. Management of digital ulcers related to systemic sclerosis. *Nursing Standard (through 2013)* 2010;24(32):53.
16. Brown RT, Shaftman SR, Tilley BC, et al. The health education for lupus study: a randomized controlled cognitive-behavioral intervention targeting psychosocial adjustment and quality of life in adolescent females with systemic lupus erythematosus. *The American journal of the medical sciences* 2012;344(4):274-82.
17. Carrera BG, Vargas-Hitos JA, Morillas-De-Laguno P, et al. Might a 12-week aerobic exercise intervention improve patient-reported outcomes in women with systemic lupus erythematosus? *Annals of the Rheumatic Diseases* 2019;78:798. doi: 10.1136/annrheumdis-2019-eular.6789
18. Soriano-Maldonado A, Morillas-de-Laguno P, Sabio JM, et al. Effects of 12-week aerobic exercise on arterial stiffness, inflammation, and cardiorespiratory fitness in women with systemic LUPUS erythematosus: non-randomized controlled trial. *Journal of clinical medicine* 2018;7(12):477.
19. Carrier ME, Kwakkenbos L, Nielson WR, et al. The Scleroderma Patient-Centered Intervention Network Self-Management Program: Protocol for a Randomized Feasibility Trial. *JMIR Res Protoc* 2020;9(4):e16799. doi: 10.2196/16799 [published Online First: 2020/04/25]
20. Carrier ME, Kwakkenbos L, Boutron I, et al. Randomized feasibility trial of the Scleroderma patient-centered intervention network hand exercise program (SPIN-HAND): Study protocol. *Journal of Scleroderma and Related Disorders* 2018;3(1):91-97. doi: 10.5301/jsrd.5000263
21. Carvalho MRPd, Sato EI, Tebexreni AS, et al. Effects of supervised cardiovascular training program on exercise tolerance, aerobic capacity, and quality of life in patients with systemic lupus erythematosus. *Arthritis Care & Research: Official Journal of the American College of Rheumatology* 2005;53(6):838-44.
22. Clarke-Jenssen AC, Fredriksen PM, Lilleby V, et al. Effects of supervised aerobic exercise in patients with systemic lupus erythematosus: a pilot study. *Arthritis Care & Research: Official Journal of the American College of Rheumatology* 2005;53(2):308-12.
23. Cunningham N, Moorman E, Fussner L, et al. Development of the treatment and education approach for childhood-onset lupus (TEACH) intervention for adolescents and young adults. *Pediatric Rheumatology* 2018;16 doi: 10.1186/s12969-018-0252-y
24. Cunningham NR, Fussner LM, Moorman E, et al. Development and pilot testing of the treatment and education approach for childhood-onset lupus (TEACH): a cognitive behavioral treatment. *Pediatric Rheumatology* 2019;17(1):9.
25. Daltroy L, Robb-Nicholson C, Iversen M, et al. Effectiveness of minimally supervised home aerobic training in patients with systemic rheumatic disease. *Rheumatology* 1995;34(11):1064-69.
26. Dobkin PL, Da Costa D, Joseph L, et al. Counterbalancing patient demands with evidence: results from a pan-Canadian randomized clinical trial of brief supportive-expressive group psychotherapy for women with systemic lupus erythematosus. *Annals of Behavioral Medicine* 2002;24(2):88-99.

27. Doerfler B, Allen TS, Southwood C, et al. Medical nutrition therapy for patients with advanced systemic sclerosis (MNT PASS): a pilot intervention study. *Journal of Parenteral and Enteral Nutrition* 2017;41(4):678-84.
28. Drenkard C, Easley K, Bao G, et al. Overcoming barriers to recruitment and retention of African-American women with SLE in behavioural interventions: lessons learnt from the WELL study. *Lupus Sci Med* 2020;7(1) doi: 10.1136/lupus-2020-000391 [published Online First: 2020/06/14]
29. Drenkard C, Dunlop-Thomas C, Easley K, et al. Benefits of a self-management program in low-income African-American women with systemic lupus erythematosus: results of a pilot test. *Lupus* 2012;21(14):1586-93.
30. Edworthy SM, Dobkin PL, Clarke AE, et al. Group psychotherapy reduces illness intrusiveness in systemic lupus erythematosus. *The Journal of rheumatology* 2003;30(5):1011-16.
31. Everett ST, Wolf R, Contento I, et al. Short-term patient-centered nutrition counseling impacts weight and nutrient intake in patients with systemic lupus erythematosus. *Lupus* 2015;24(12):1321-26.
32. Filippetti M, Cazzoletti L, Zamboni F, et al. Effect of a tailored home-based exercise program in patients with systemic sclerosis: a randomized controlled trial. *Scandinavian Journal of Medicine & Science in Sports* 2020 Apr 29:Epub ahead of print 2020
33. Freedman RR, Ianni P, Wenig P. Behavioral treatment of Raynaud's phenomenon in scleroderma. *Journal of behavioral medicine* 1984;7(4):343-53.
34. Greco CM. Reducing Depressive Symptoms in Systemic Lupus Erythematosus [ClinicalTrials.gov identifier: NCT01120652]: ClinicalTrials.gov; 2015 [access year 2020].
35. Greco CM, Rudy TE, Manzi S. Effects of a stress-reduction program on psychological function, pain, and physical function of systemic lupus erythematosus patients: A randomized controlled trial. *Arthritis Care & Research* 2004;51(4):625-34.
36. Gregory WJ, Wilkinson J, Herrick AL. A randomised controlled trial of wax baths as an additive therapy to hand exercises in patients with systemic sclerosis. *Physiotherapy* 2019;105(3):370-77. doi: 10.1016/j.physio.2018.08.008
37. Harrison M, Morris K, Horton R, et al. Results of intervention for lupus patients with self-perceived cognitive difficulties. *Neurology* 2005;65(8):1325-27.
38. Haupt M, Millen S, Jänner M, et al. Improvement of coping abilities in patients with systemic lupus erythematosus: a prospective study. *Annals of the rheumatic diseases* 2005;64(11):1618-23.
39. Herschman J, Kasenberg T, Levy D, et al. Development of a smartphone app for adolescents with lupus: a collaborative meeting-based methodology inclusive of a wide range of stakeholders. *Revista Panamericana de Salud Pública* 2014;35:471-76.
40. Horton R, Peterson MG, Powell S, et al. Users evaluate lupusline a telephone peer counseling service. *Arthritis & Rheumatism: Official Journal of the American College of Rheumatology* 1997;10(4):257-63.
41. Horváth J, Bálint Z, Szép E, et al. Efficacy of intensive hand physical therapy in patients with systemic sclerosis. *Clin Exp Rheumatol* 2017;35(Suppl 106):159-66.
42. Kankaya H, Karadakovan A. Effects of web-based education and counselling for patients with systemic lupus erythematosus: self-efficacy, fatigue and assessment of care. *Lupus* 2020;29(8):884-91. doi: 10.1177/0961203320928423 [published Online First: 2020/06/02]
43. Karlson EW, Liang MH, Eaton H, et al. A randomized clinical trial of a psychoeducational intervention to improve outcomes in systemic lupus erythematosus. *Arthritis & Rheumatism: Official Journal of the American College of Rheumatology* 2004;50(6):1832-41.

44. Keramiotou K, Anagnostou C, Kataxaki E, et al. The impact of upper limb exercise on function, daily activities and quality of life in systemic lupus erythematosus: A pilot randomised controlled trial. *RMD Open* 2020;6(1) doi: 10.1136/rmdopen-2019-001141
45. Khanna D. Taking Charge of Systemic Sclerosis (TOSS) [ClinicalTrials.gov identifier: NCT02494401] 2019 [
46. Khanna D, Serrano J, Berrocal VJ, et al. Randomized Controlled Trial to Evaluate an Internet-Based Self-Management Program in Systemic Sclerosis. *Arthritis Care & Research* 2019;71(3):435-47. doi: 10.1002/acr.23595
47. Kristensen LQ, Oestergaard LG, Bovbjerg K, et al. Use of paraffin instead of lukewarm water prior to hand exercises had no additional effect on hand mobility in patients with systemic sclerosis: a randomized clinical trial. *Hand Therapy* 2019 Mar;24(1):13-21 2019
48. Kusnanto K, Sari NPWP, Harmayetty H, et al. Self-care model application to improve self-care agency, self-care activities, and quality of life in patients with systemic lupus erythematosus. *Journal of Taibah University medical sciences* 2018;13(5):472-78.
49. Kwakkenbos L, Willems LM, van den Hoogen FH, et al. Cognitive-behavioural therapy targeting fear of progression in an interdisciplinary care program: a case study in systemic sclerosis. *Journal of clinical psychology in medical settings* 2014;21(4):297-312.
50. Kwakkenbos L, Bluysen S, Vonk M, et al. Addressing patient health care demands in systemic sclerosis: pre-post assessment of a psycho-educational group programme. *Clinical and Experimental Rheumatology-Incl Supplements* 2011;29(2):S60.
51. Landim SF, Bertolo MB, Marcatto de Abreu MF, et al. The evaluation of a home-based program for hands in patients with systemic sclerosis. *Journal of Hand Therapy* 2019;32(3):313-21. doi: 10.1016/j.jht.2017.10.013
52. Landim S, Bertolo M, Del Rio AP, et al. Sustained efficacy of a concise self-management programme for hands in systemic sclerosis: a longitudinal case-control observational study. *Rheumatology* 2020
53. Li LC, Feehan LM, Xie H, et al. Efficacy of a physical activity counselling program with use of wearable tracker in people with inflammatory arthritis: a randomized controlled trial [with consumer summary]. *Arthritis Care & Research* 2020 Apr 5:Epub ahead of print 2020
54. Maddali-Bongi S, Del Rosso A, Passalacqua M, et al. Manual lymph drainage improving upper extremity edema and hand function in patients with systemic sclerosis in edematous phase. *Arthritis care & research* 2011;63(8):1134-41.
55. Maddali-Bongi S, Del Rosso A, Galluccio F, et al. Efficacy of connective tissue massage and Mc Mennell joint manipulation in the rehabilitative treatment of the hands in systemic sclerosis. *Clinical rheumatology* 2009;28(10):1167-73.
56. Maddali-Bongi S, Del Rosso A, Galluccio F, et al. Efficacy of a tailored rehabilitation program for systemic sclerosis. *Clinical & Experimental Rheumatology* 2009;27(3):S44.
57. Maddali-Bongi S, Landi G, Galluccio F, et al. The rehabilitation of facial involvement in systemic sclerosis: efficacy of the combination of connective tissue massage, Kabat's technique and kinesitherapy: a randomized controlled trial. *Rheumatology international* 2011;31(7):895-901.
58. Maisiak R, Austin J, West S, et al. The effect of person-centered counseling on the psychological status of persons with systemic lupus erythematosus or rheumatoid arthritis. A randomized, controlled trial. *Arthritis & Rheumatism: Official Journal of the American College of Rheumatology* 1996;9(1):60-66.
59. Mancuso T, Poole JL. The effect of paraffin and exercise on hand function in persons with scleroderma: a series of single case studies. *Journal of Hand Therapy* 2009;22(1):71-78.
60. Martin MM. Effects of the myofascial release in diffuse systemic sclerosis. *Journal of bodywork and movement therapies* 2009;13(4):320-27.

61. McNearney TA, Sallam HS, Hunnicutt SE, et al. Prolonged treatment with transcutaneous electrical nerve stimulation (TENS) modulates neuro-gastric motility and plasma levels of vasoactive intestinal peptide (VIP), motilin and interleukin-6 (IL-6) in systemic sclerosis. *Clin Exp Rheumatol* 2013;31(2 suppl 76):140-50.
62. Miljeteig K, Graue M. Evaluation of a multidisciplinary patient education program for people with systemic lupus erythematosus. *Journal of Nursing and Healthcare of Chronic Illness* 2009;1(1):87-95.
63. Mitropoulos A, Gumber A, Akil M, et al. Exploring the microcirculatory effects of an exercise programme including aerobic and resistance training in people with limited cutaneous systemic sclerosis. *Microvasc Res* 2019;125:103887. doi: 10.1016/j.mvr.2019.103887 [published Online First: 2019/06/21]
64. Mitropoulos A, Gumber A, Crank H, et al. Exploring the feasibility of an exercise programme including aerobic and resistance training in people with limited cutaneous systemic sclerosis [with consumer summary]. *Clinical Rheumatology* 2020 Jun;39(6):1889-1898 2020
65. Mitropoulos A, Gumber A, Crank H, et al. The effects of upper and lower limb exercise on the microvascular reactivity in limited cutaneous systemic sclerosis patients. *Arthritis research & therapy* 2018;20(1):112.
66. Mouthon L, Thombs BD. Scleroderma Patient-centered Intervention Network (SPIN) Hand Program (SPIN-HAND) [ClinicalTrials.gov identifier: NCT03419208]: ClinicalTrials.gov; 2020 [access year 2020].
67. Mugii N, Hasegawa M, Matsushita T, et al. The efficacy of self-administered stretching for finger joint motion in Japanese patients with systemic sclerosis. *The Journal of rheumatology* 2006;33(8):1586-92.
68. Mugii N, Matsushita T, Oohata S, et al. Long-term follow-up of finger passive range of motion in Japanese systemic sclerosis patients treated with self-administered stretching. *Modern rheumatology* 2019;29(3):484-90.
69. Murphy S. Rehabilitation for Arm Coordination and Hand Movement in Systemic Sclerosis (REACH) [ClinicalTrials.gov identifier: NCT03482219]: ClinicalTrials.gov; 2019 [access year 2020].
70. Murphy SL, Barber MW, Homer K, et al. Occupational therapy treatment to improve upper extremity function in individuals with early systemic sclerosis: a pilot study. *Arthritis care & research* 2018;70(11):1653-60.
71. Navarrete-Navarrete N, Peralta-Ramírez M, Sabio-Sánchez J, et al. Efficacy of cognitive behavioural therapy for the treatment of chronic stress in patients with lupus erythematosus: a randomized controlled trial. *Psychotherapy and psychosomatics* 2010;79(2):107-15.
72. Naylor WP. Oral management of the scleroderma patient. *The Journal of the American Dental Association* 1982;105(5):814-17.
73. Naylor WP, Douglass CW, Mix E. The nonsurgical treatment of microstomia in scleroderma: a pilot study. *Oral surgery, oral medicine, oral pathology* 1984;57(5):508-11.
74. Neville C, Da Costa D, Rochon M, et al. Development of the Lupus interactive navigator as an empowering web-based eHealth tool to facilitate Lupus management: users perspectives on usability and acceptability. *JMIR research protocols* 2016;5(2):e44.
75. Ng P, Chan W. Group psychosocial program for enhancing psychological well-being of people with systemic lupus erythematosus. *Journal of Social Work in Disability & Rehabilitation* 2007;6(3):75-87.
76. O'Riordan R, Doran M, Connolly D. Fatigue and activity management education for individuals with systemic lupus erythematosus. *Occupational therapy international* 2017;2017

77. O'Connor S, Durand M-J, Hudson M, et al. Effects of osteopathic manipulative treatment on hand function, disease symptoms and functional status in systemic sclerosis: a series of single-case studies in working women. *International Journal of Osteopathic Medicine* 2016;22:21-32.
78. Oliveira N, dos Santos Sabbag L, de Sa Pinto A, et al. Aerobic exercise is safe and effective in systemic sclerosis. *International journal of sports medicine* 2009;30(10):728-32.
79. Parisi S, Celletti C, Scarati M, et al. Neuromuscular taping enhances hand function in patients with systemic sclerosis: a pilot study. *La Clinica Terapeutica* 2017;168(6):e371-e75.
80. Perandini LA, Sales-de-Oliveira D, Mello SB, et al. Exercise training can attenuate the inflammatory milieu in women with systemic lupus erythematosus. *Journal of Applied Physiology* 2014;117(6):639-47.
81. Piga M, Tradori I, Pani D, et al. Telemedicine applied to kinesiotherapy for hand dysfunction in patients with systemic sclerosis and rheumatoid arthritis: recovery of movement and telemonitoring technology. *The Journal of rheumatology* 2014;41(7):1324-33.
82. Pinto AL, Oliveira NC, Gualano B, et al. Efficacy and safety of concurrent training in systemic sclerosis. *The Journal of Strength & Conditioning Research* 2011;25(5):1423-28.
83. Pizzo G, Scardina G, Messina P. Effects of a nonsurgical exercise program on the decreased mouth opening in patients with systemic scleroderma. *Clinical oral investigations* 2003;7(3):175-78.
84. Poole JL, Skipper B, Mendelson C. Evaluation of a mail-delivered, print-format, self-management program for persons with systemic sclerosis. *Clinical rheumatology* 2013;32(9):1393-98.
85. Poole JL, Mendelson C, Skipper B, et al. Taking charge of systemic sclerosis: A pilot study to assess the effectiveness of an internet self-management program. *Arthritis care & research* 2014;66(5):778-82.
86. Poole J, Conte C, Brewer C, et al. Oral hygiene in scleroderma: the effectiveness of a multi-disciplinary intervention program. *Disability and rehabilitation* 2010;32(5):379-84.
87. Prado DM, Benatti FB, de Sá-Pinto AL, et al. Exercise training in childhood-onset systemic lupus erythematosus: a controlled randomized trial. *Arthritis research & therapy* 2013;15(2):R46.
88. Prado DM, Gualano B, Pinto A, et al. Exercise in a child with systemic lupus erythematosus and antiphospholipid syndrome. *Medicine and science in sports and exercise* 2011;43(12):2221-23.
89. Ramsey-Goldman R, Schilling EM, Dunlop D, et al. A pilot study on the effects of exercise in patients with systemic lupus erythematosus. *Arthritis Care & Research* 2000;13(5):262-69.
90. Rannou F, Boutron I, Mouthon L, et al. Personalized physical therapy versus usual care for patients with systemic sclerosis: a randomized controlled trial. *Arthritis care & research* 2017;69(7):1050-59.
91. Reis LK, Trevisani VF. Aerobic Exercise on Improving Sleep in Systemic Lupus Erythematosus. (EFEXO) [ClinicalTrials.gov identifier: NCT02037971]: ClinicalTrials.gov; 2014 [access year 2020].
92. Reis-Neto ETd, Silva AEd, Monteiro CMdC, et al. Supervised physical exercise improves endothelial function in patients with systemic lupus erythematosus. *Rheumatology* 2013;52(12):2187-95.

93. Rimmer JH, Wang E, Pellegrini CA, et al. Telehealth weight management intervention for adults with physical disabilities: a randomized controlled trial. *American journal of physical medicine & rehabilitation* 2013;92(12):1084-94.
94. Sahebalzamani M, Farahani H, Tabatabaee Jamarani M, et al. Effects of a Continuous Care Model on Patients' Knowledge and Health-Related Quality of Life in Systemic Lupus Erythematosus. *Rehabilitation Nursing* 2016
95. Samuelson UK, Ahlmén EM. Development and evaluation of a patient education program for persons with systemic sclerosis (scleroderma). *Arthritis Care & Research* 2000;13(3):141-48.
96. Sandqvist G, Åkesson A, Eklund M. Evaluation of paraffin bath treatment in patients with systemic sclerosis. *Disability and rehabilitation* 2004;26(16):981-87.
97. Schouffoer A, Ninaber M, Beart-van de Voorde L, et al. Randomized comparison of a multidisciplinary team care program with usual care in patients with systemic sclerosis. *Arthritis care & research* 2011;63(6):909-17.
98. Sheffield Hallam University. The Effects of Exercise in Patients With Systemic Sclerosis [ClinicalTrials.gov identifier: NCT03058887]: ClinicalTrials.gov; 2019 [access year 2020].
99. Sheikh SZ, Kaufman K, Gordon BB, et al. Evaluation of the self-directed format of Walk With Ease in patients with systemic lupus erythematosus: the Walk-SLE Pilot Study. *Lupus* 2019;28(6):764-70. doi: 10.1177/0961203319846387 [published Online First: 2019/05/02]
100. Sohng KY. Effects of a self-management course for patients with systemic lupus erythematosus. *Journal of Advanced Nursing* 2003;42(5):479-86.
101. Tench C, McCarthy J, McCurdie I, et al. Fatigue in systemic lupus erythematosus: a randomized controlled trial of exercise. *Rheumatology* 2003;42(9):1050-54.
102. Thombs BD, Dyas L, Pepin M, et al. Scleroderma Patient-centered Intervention Network-Scleroderma Support group Leader EDucation (SPIN-SSLED) program: non-randomised feasibility trial. *BMJ open* 2019;9(11):e029935. doi: 10.1136/bmjopen-2019-029935 [published Online First: 2019/11/14]
103. Timóteo RP, Silva AF, Micheli DC, et al. Increased flexibility, pain reduction and unaltered levels of IL-10 and CD11b+ lymphocytes in patients with systemic lupus erythematosus were associated with kinesiotherapy. *Lupus* 2018;27(7):1159-68.
104. Twumasi AA, Shao A, Dunlop-Thomas C, et al. Exploring the Perceived Impact of the Chronic Disease Self-Management Program on Self-Management Behaviors among African American Women with Lupus: A Qualitative Study. *ACR Open Rheumatology* 2020;2(3):147-57. doi: 10.1002/acr2.11117
105. Twumasi AA, Shao A, Dunlop-Thomas C, et al. Health service utilization among African American women living with systemic lupus erythematosus: perceived impacts of a self-management intervention. *Arthritis Res Ther* 2019;21(1):155. doi: 10.1186/s13075-019-1942-7 [published Online First: 2019/06/27]
106. Uras C, Mastroeni S, Tabolli S, et al. A comparison between two educational methods in the rehabilitation of the microstomia in systemic sclerosis: A randomized controlled trial. *Clinical Rehabilitation* 2019;33(11):1747-56.
107. Vitali C, Baldanzi C, Crispiatico V, et al. Effect of Impairment-Oriented and Function-Oriented Exercises on Mouth Function in Subjects with Systemic Sclerosis. *Folia Phoniatr Logop* 2019;1-13. doi: 10.1159/000502643 [published Online First: 2019/09/25]
108. Williams EM, Dismuke CL, Faith TD, et al. Cost-effectiveness of a peer mentoring intervention to improve disease self-management practices and self-efficacy among African American women with systemic lupus erythematosus: analysis of the Peer Approaches to Lupus Self-management (PALS) pilot study. *Lupus* 2019;28(8):937-44. doi: 10.1177/0961203319851559

109. Williams EM, Egede L, Oates JC, et al. Peer approaches to self-management (PALS): comparing a peer mentoring approach for disease self-management in African American women with lupus with a social support control: study protocol for a randomized controlled trial. *Trials* 2019;20(1):N.PAG-N.PAG. doi: 10.1186/s13063-019-3580-4
110. Williams EM, Hyer JM, Viswanathan R, et al. Cytokine balance and behavioral intervention; findings from the Peer Approaches to Lupus Self-Management (PALS) project. *Human immunology* 2017;78(9):574-81.
111. Williams EM, Lorig K, Glover S, et al. Intervention to Improve Quality of life for African-American lupus patients (IQAN): study protocol for a randomized controlled trial of a unique a la carte intervention approach to self-management of lupus in African Americans. *BMC health services research* 2016;16(1):339.
112. Wolff A, Weinstock-Zlotnick G, Gordon J. SSc management—In person appointments and remote therapy (SMART): A framework for management of chronic hand conditions. *Journal of Hand Therapy* 2014;27(2):143-51.
113. Wu ML, Tsai JC, Yu KH, et al. Effects of physical activity counselling in women with systemic lupus erythematosus: A randomized controlled trial. *International Journal of Nursing Practice (John Wiley & Sons, Inc)* 2019;25(5):N.PAG-N.PAG. doi: 10.1111/ijn.12770
114. Xie X, Song Y, Yang H, et al. Effects of transitional care on self-care, readmission rates, and quality of life in adult patients with systemic lupus erythematosus: a randomized controlled trial. *Arthritis research & therapy* 2018;20(1):184.
115. Yelnik CM, Richey M, Haiduc V, et al. Cardiovascular disease prevention counseling program for systemic lupus erythematosus patients. *Arthritis care & research* 2017;69(8):1209-16.
116. Young S, Henderson E, Cheseldine D, et al. Development and assessment of a World Wide Web site for systemic lupus erythematosus patient information. *Lupus* 2002;11(8):478-84.
117. Yuen HK, Holthaus K, Kamen DL, et al. Using Wii Fit to reduce fatigue among African American women with systemic lupus erythematosus: a pilot study. *Lupus* 2011;20(12):1293-99.
118. Yuen HK, Marlow NM, Reed SG, et al. Effect of orofacial exercises on oral aperture in adults with systemic sclerosis. *Disability and rehabilitation* 2012;34(1):84-89.
119. Yuen HK, Weng Y, Bandyopadhyay D, et al. Effect of a multi-faceted intervention on gingival health among adults with systemic sclerosis. *Clinical and experimental rheumatology* 2011;29(2 Suppl 65):S26.
120. Zanatta E, Rodeghiero F, Pigatto E, et al. Long-term improvement in activities of daily living in women with systemic sclerosis attending occupational therapy. *British Journal of Occupational Therapy* 2017;80(7):417-22.
